# Supplementary material for: Genome-Wide Classification and Evolutionary Analysis Reveal Diverged Patterns of Chalcone Isomerase in Plants
Source: MDPI journal article supplement (doi:10.3390/biom12070961), 2022-07-08
Supplement: s1 [file s1]

A

OsCHI1

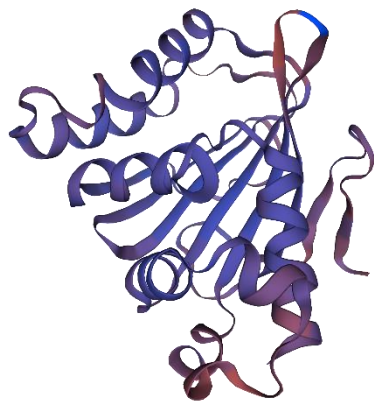

OsCHI2

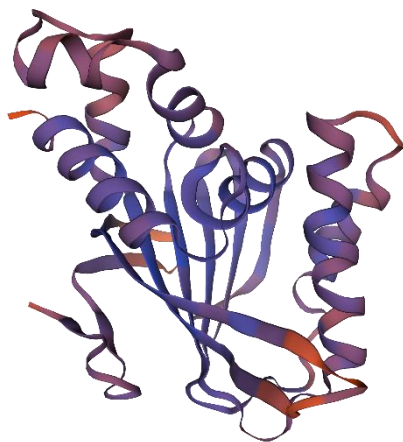

OsCHI3

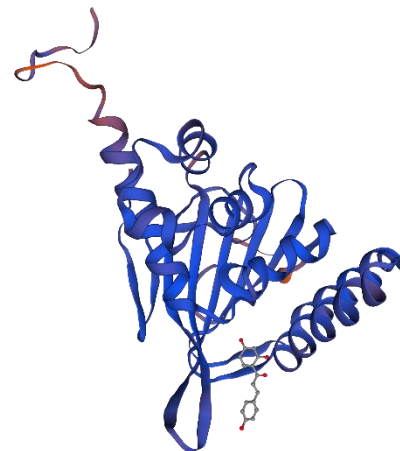

OsCHI4

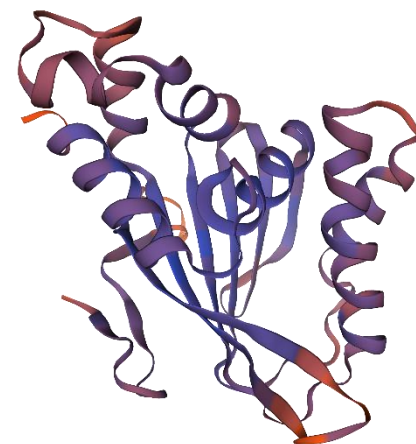

OsCHI5

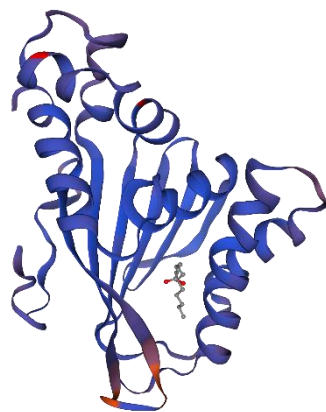

OsCHI6

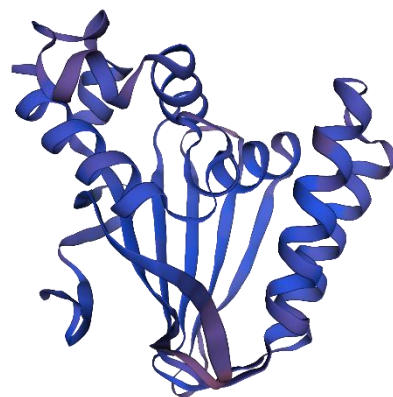

OsCHI7

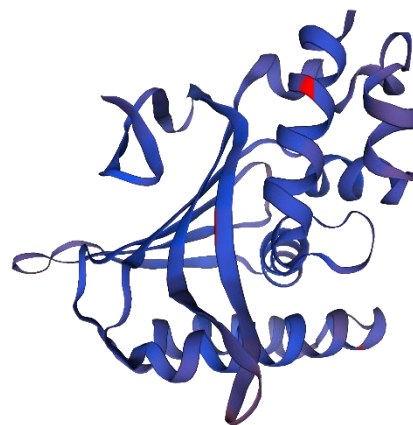

B

AtCHI1

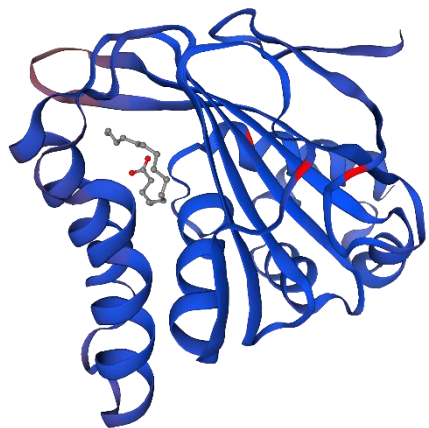

AtCHI2

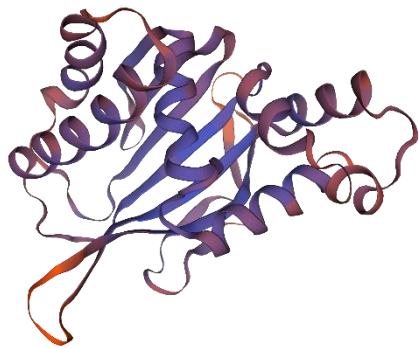

AtCHI3

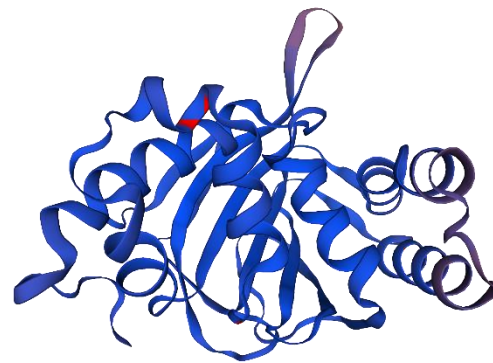

AtCHI4

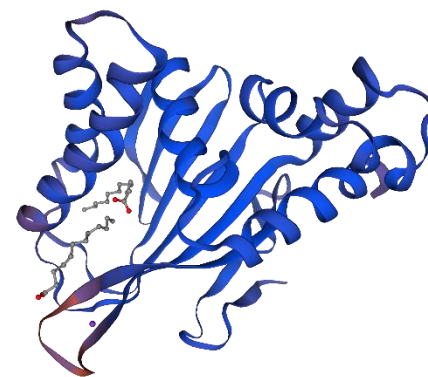

AtCHI5

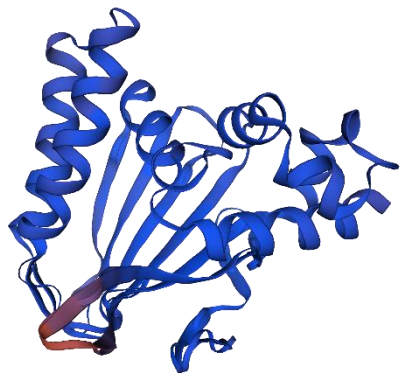

AtCHI6

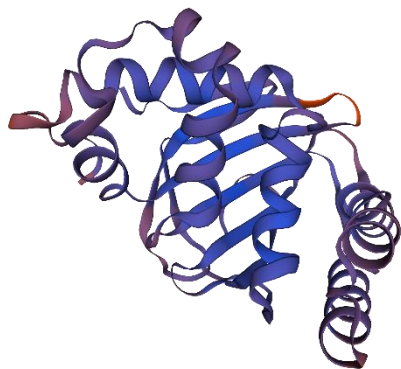

AtCHI7

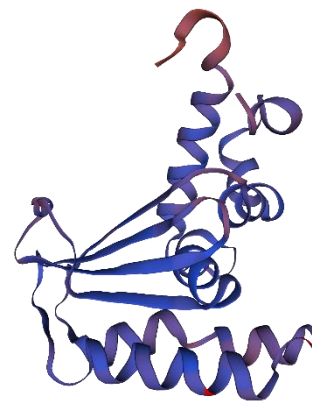

C

CrCHI1

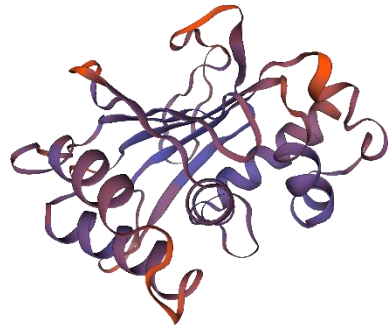

CrCHI2

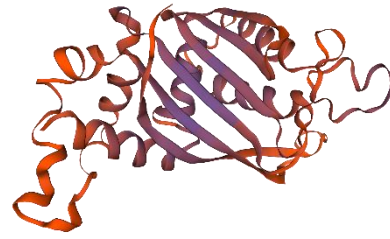

CrCHI3

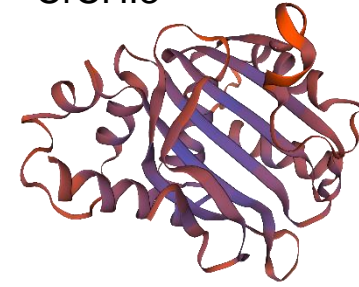

D

CsCHI1

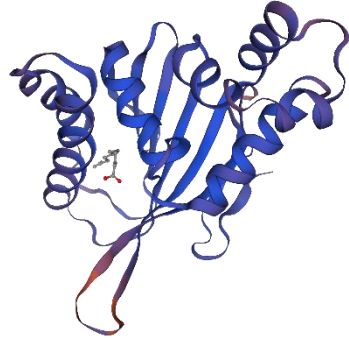

CsCHI2

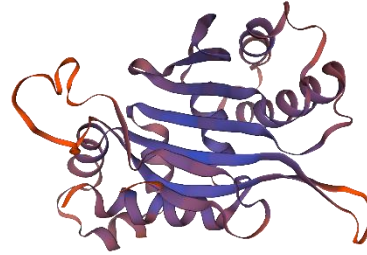

CsCHI3

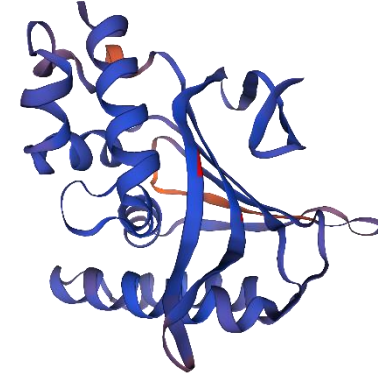

CsCHI4

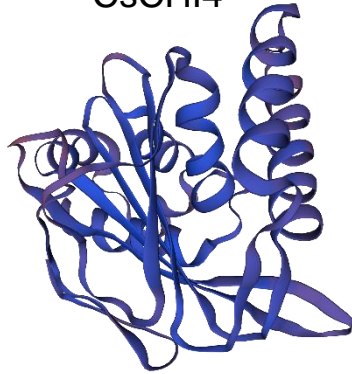

CsCHI5

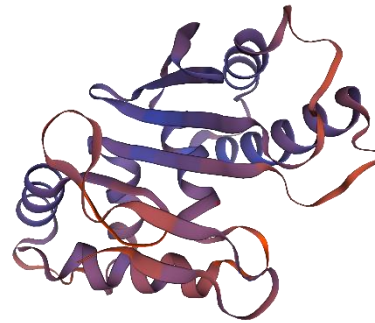

E

BoCHI1

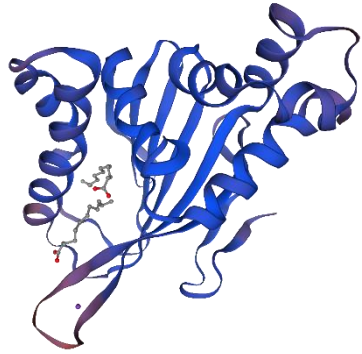

BoCHI2

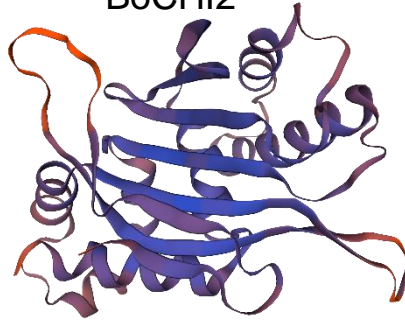

BoCHI3

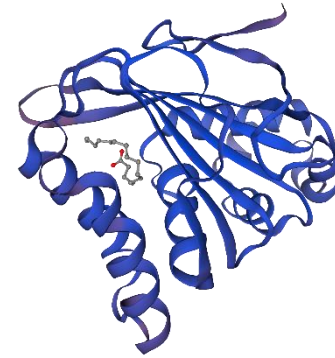

BoCHI4

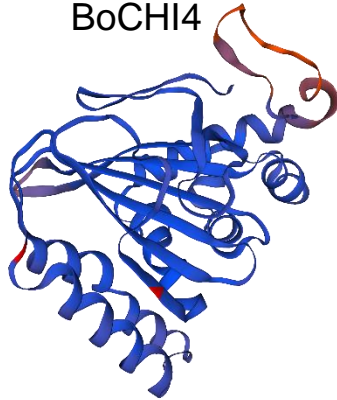

BoCHI5

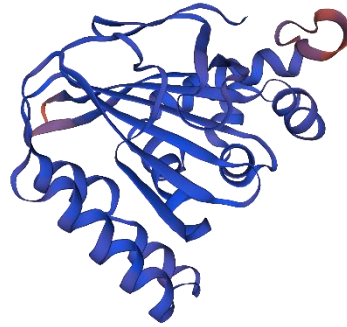

BoCHI6

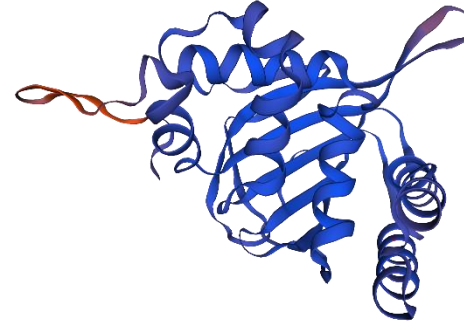

BoCHI7

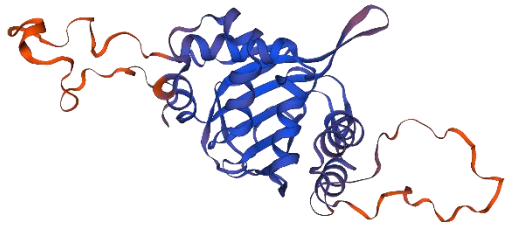

BoCHI8

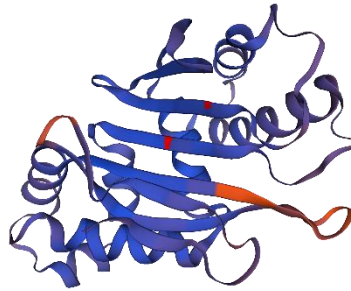

BoCHI9

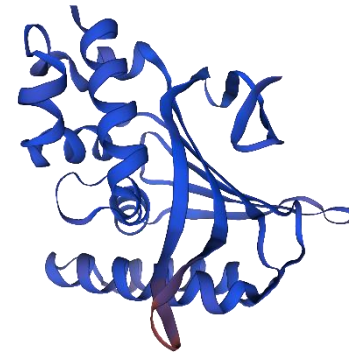

F

CqCHI1

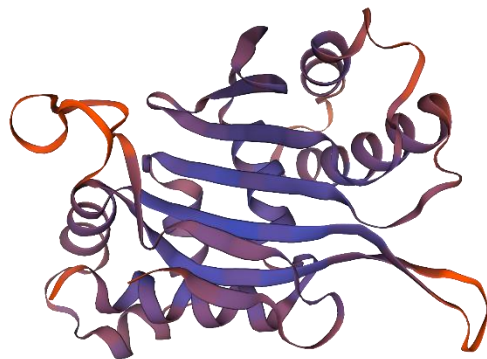

CqCHI2

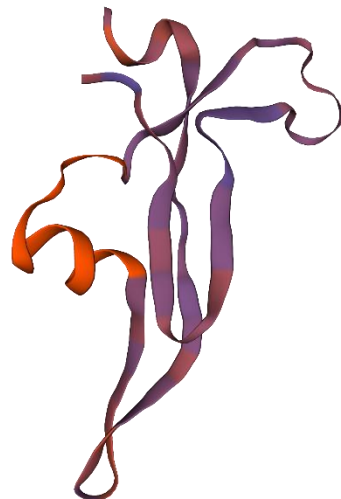

CqCHI3

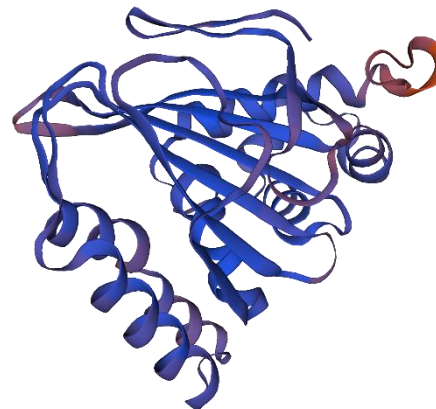

CqCHI4

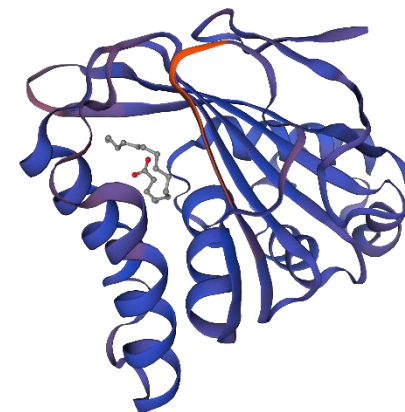

CqCHI5

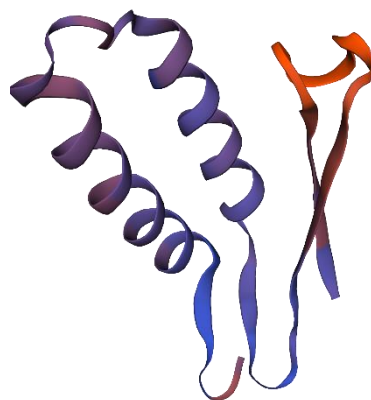

CqCHI6

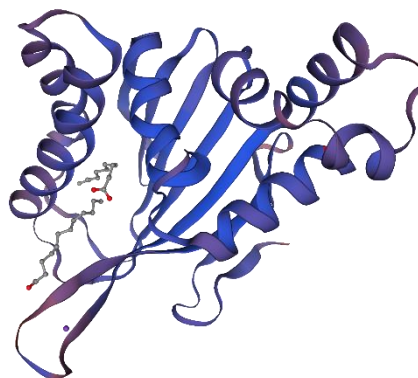

CqCHI7

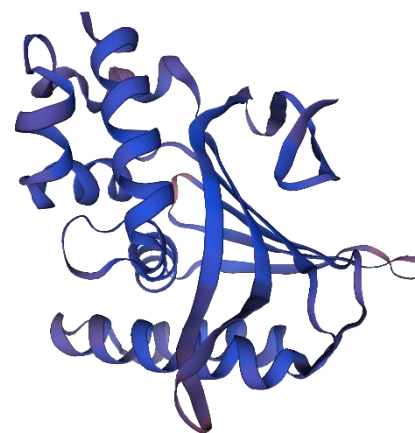



G

CriCHI1

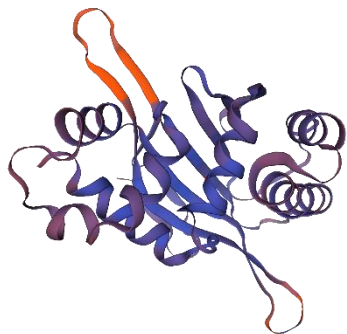

CriCHI2

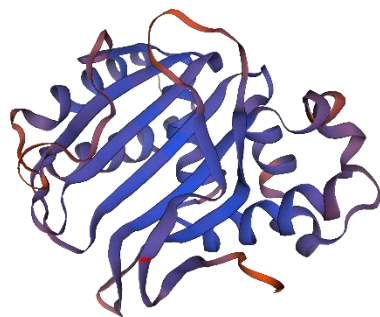

CriCHI3

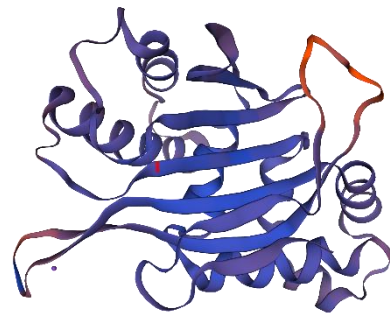

CriCHI4

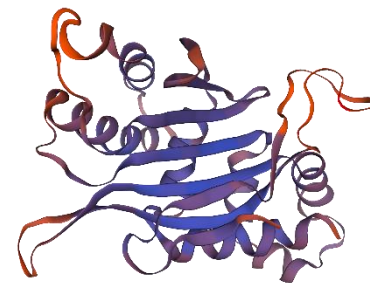

CriCHI5

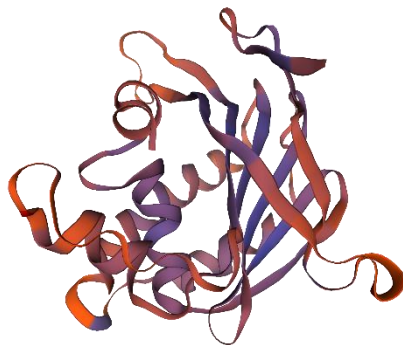

CriCHI6

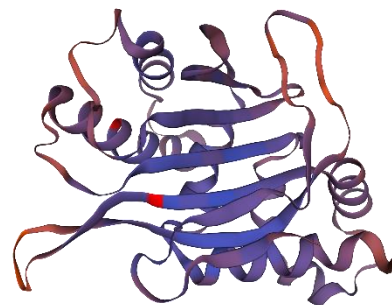

CriCHI7

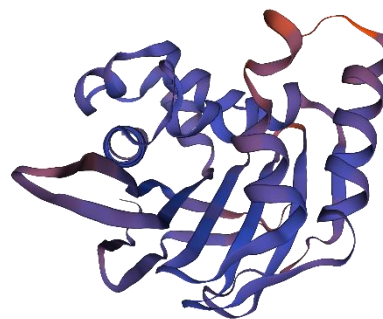

CriCHI8

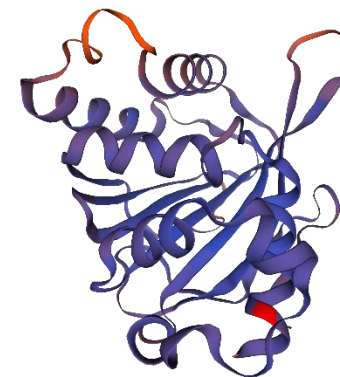

H

GmCHI1

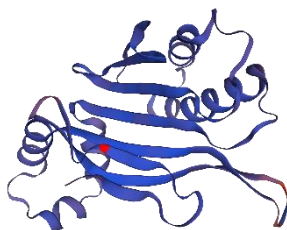

GmCHI2

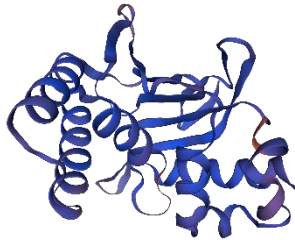

GmCHI3

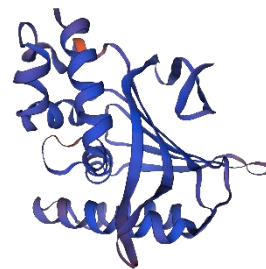

GmCHI4

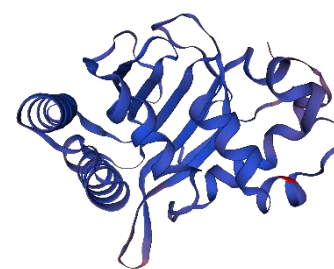

GmCHI5

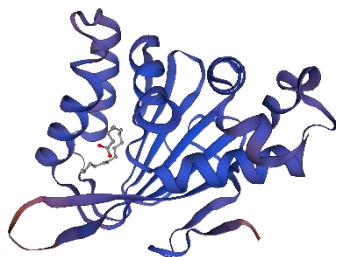

GmCHI6

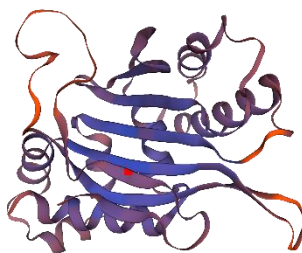

GmCHI7

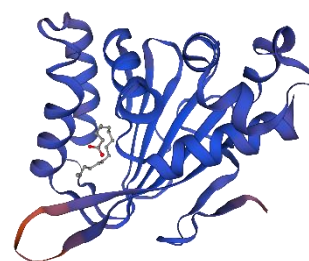

GmCHI8

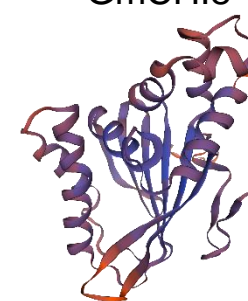

GmCHI9

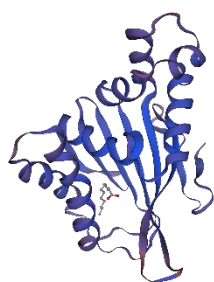

GmCHI10

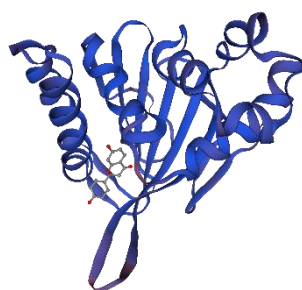

GmCHI11

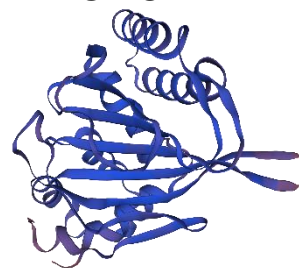

GmCHI12

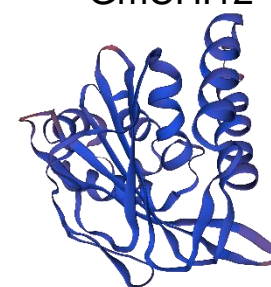

I

PpCHI1

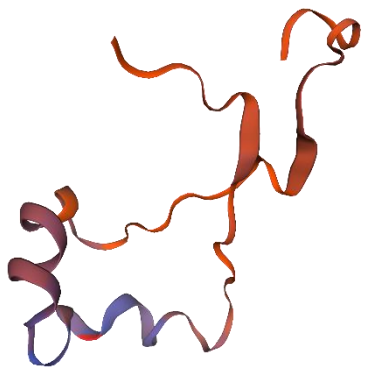

PpCHI2

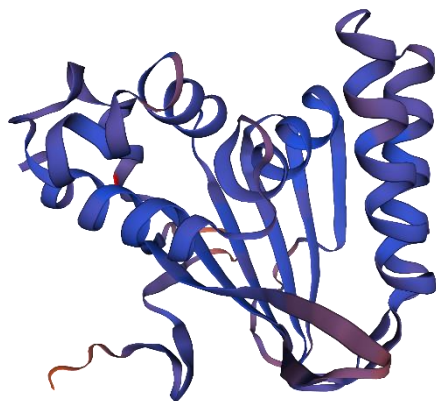

PpCHI3

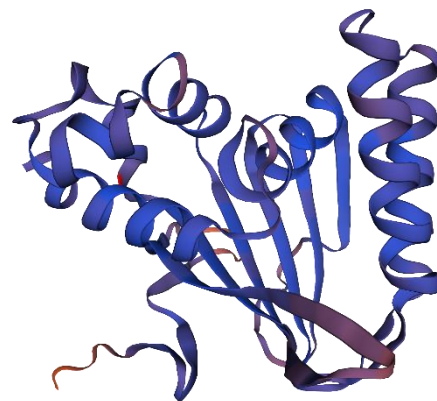

PpCHI4

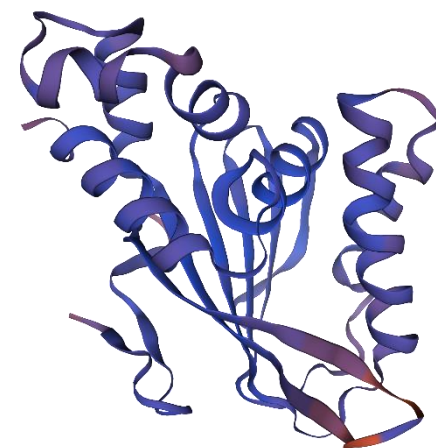

PpCHI5

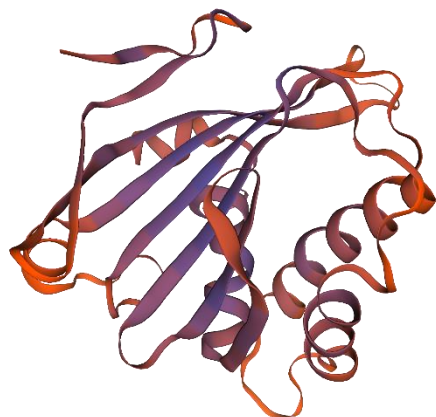

PpCHI6

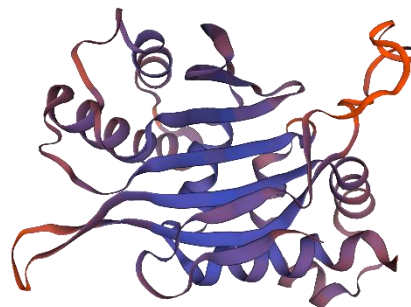

PpCHI7

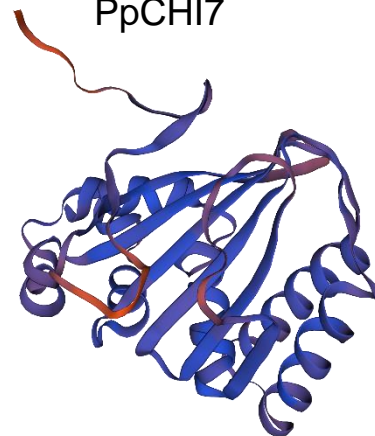



J

PtCHI1

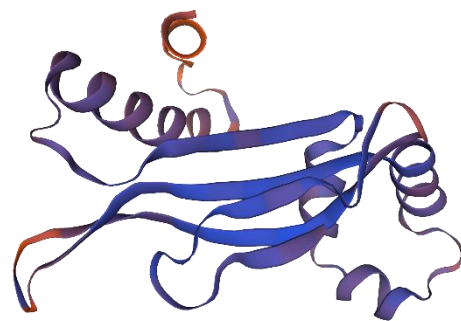

PtCHI2

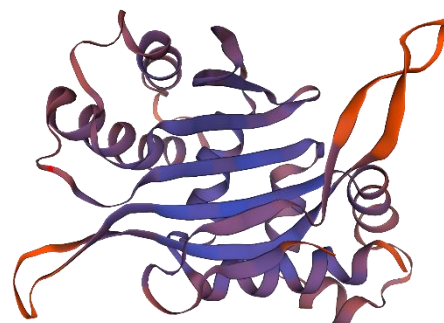

PtCHI3

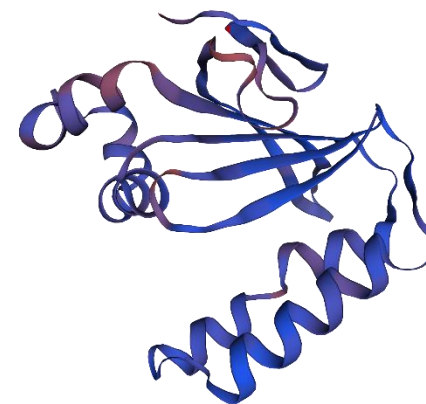

PtCHI4

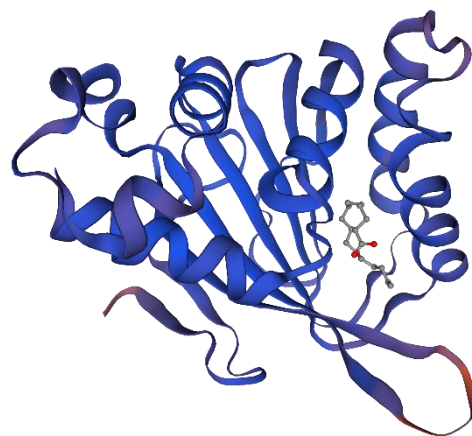

PtCHI5

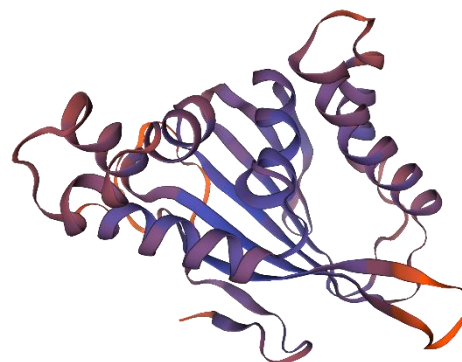

PtCHI6

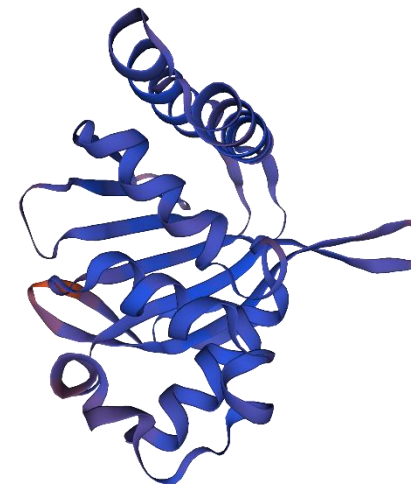

K

SICHI1

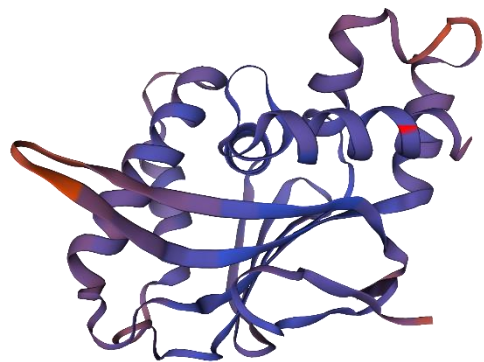

SICHI2

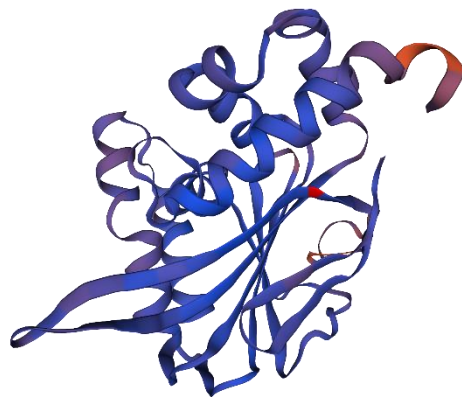

SICHI3

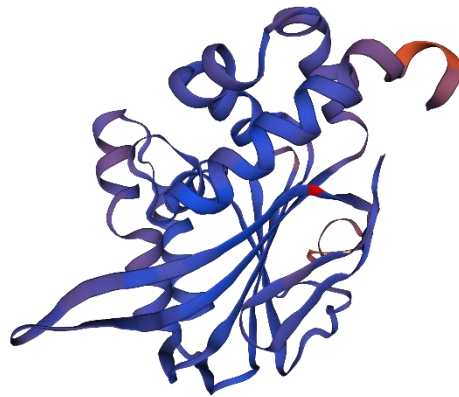

SICHI4

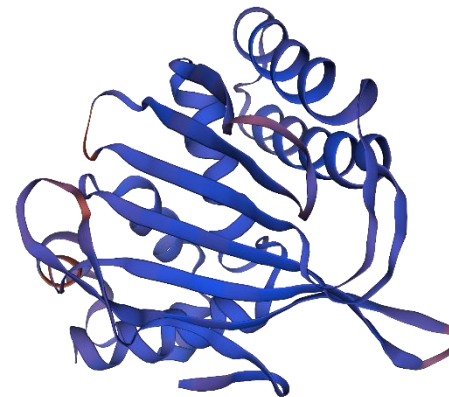

SICHI5

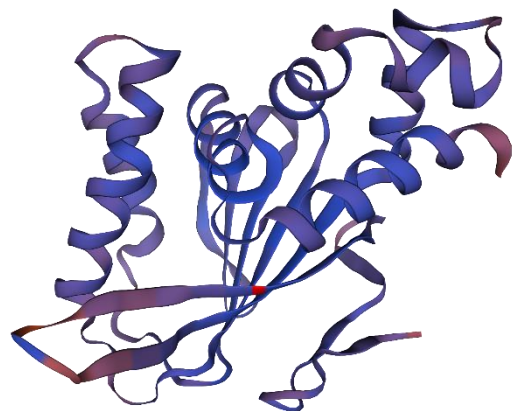

SICHI6

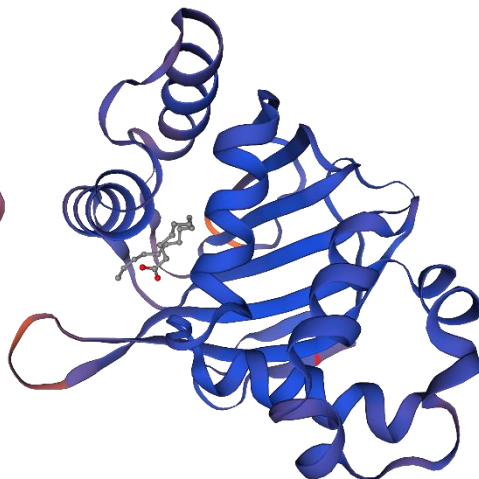

SICHI7

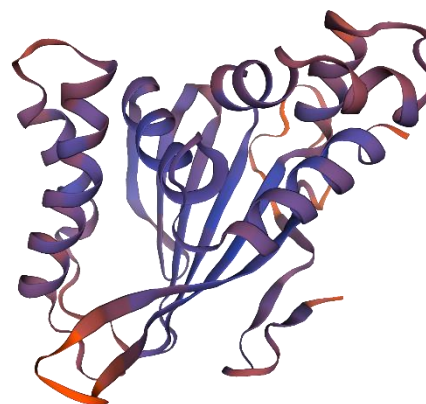

L

SmCHI1

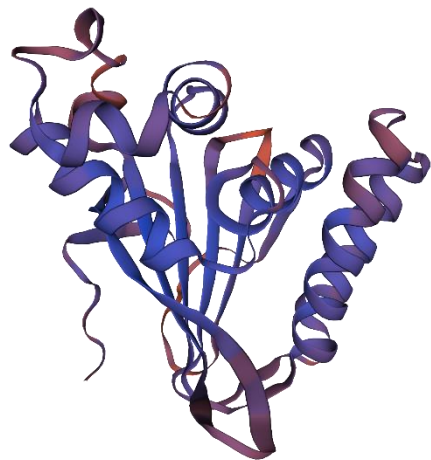

SmCHI2

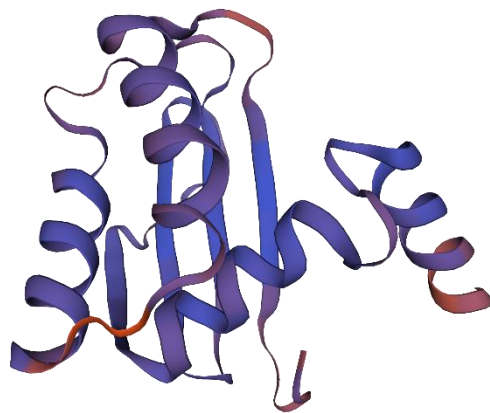

SmCHI3

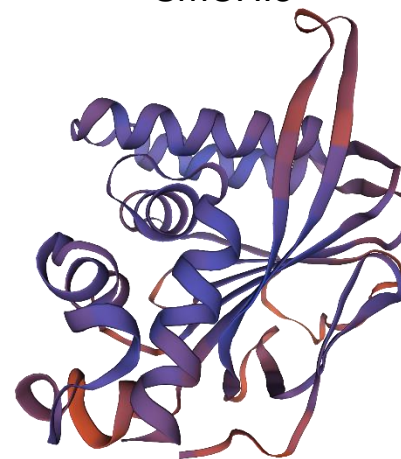

SmCHI4

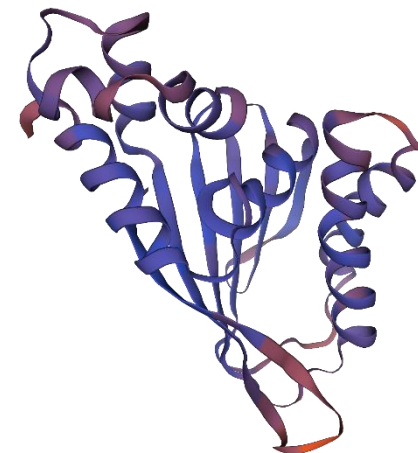

SmCHI5

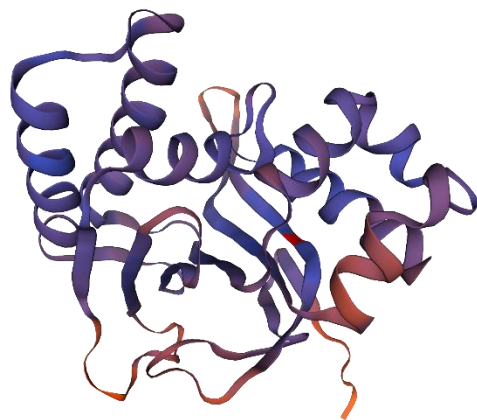

SmCHI6

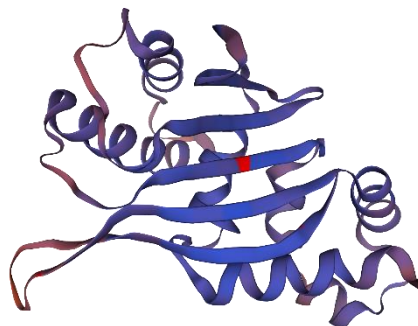

SmCHI7

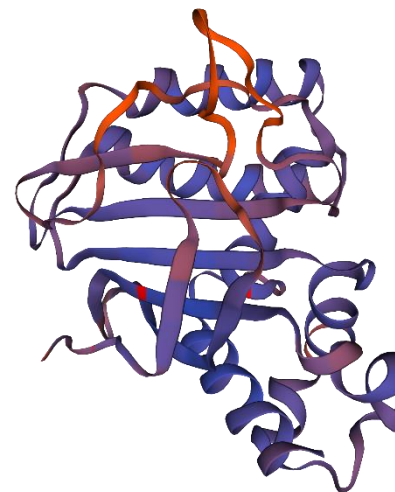

SmCHI8

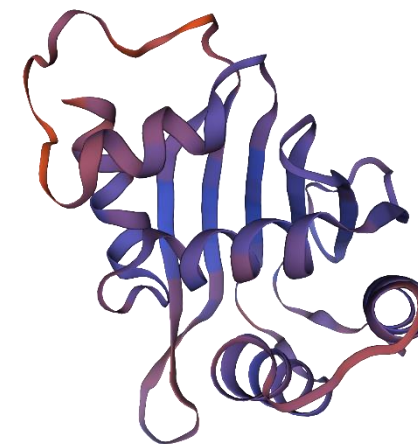

M

TaCHI1

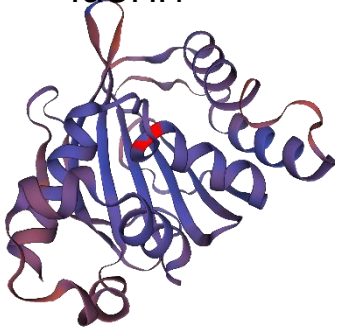

TaCHI2

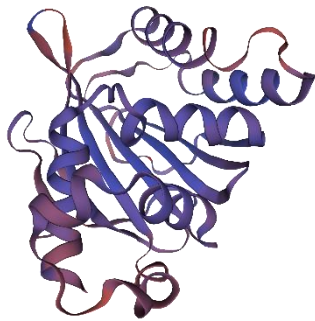

TaCHI3

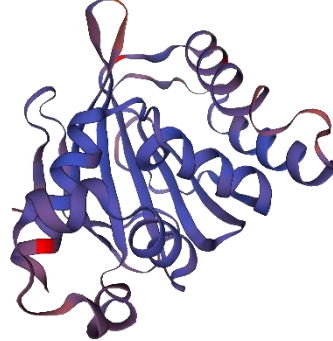

TaCHI4

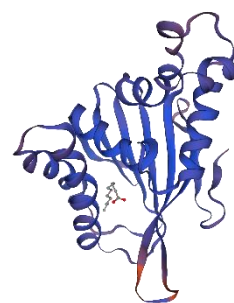

TaCHI5

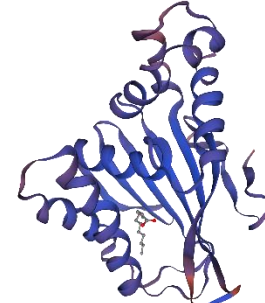

TaCHI6

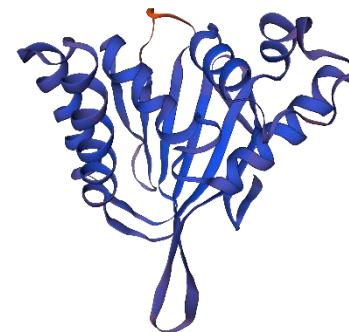

TaCHI7

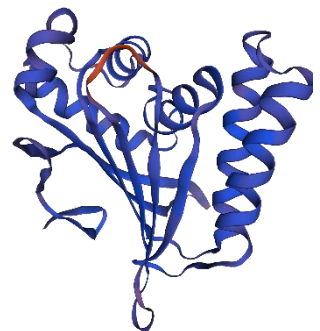

TaCHI8

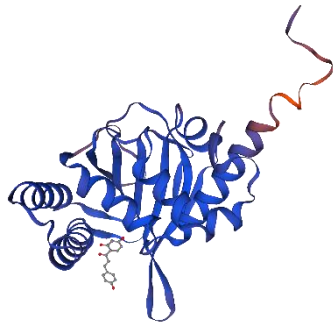

TaCHI9

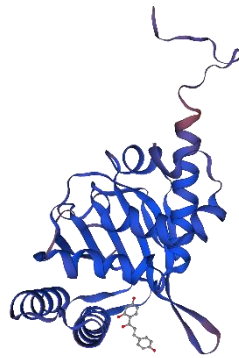

TaCHI10

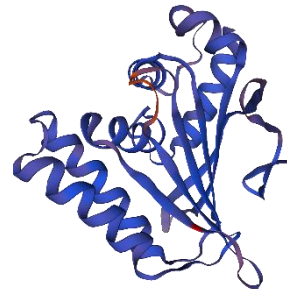

TaCHI11

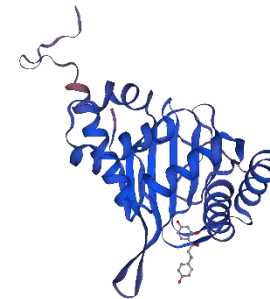

TaCHI12

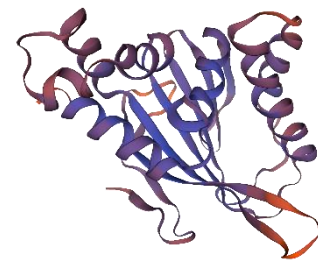

TaCHI13

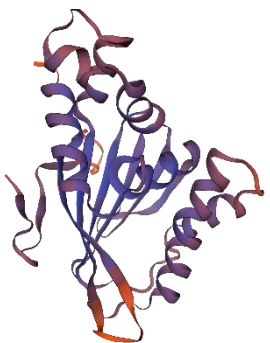

TaCHI14

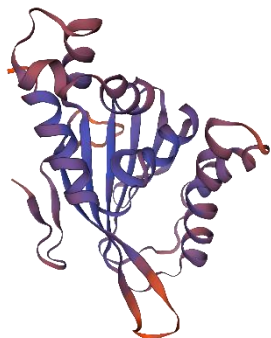

TaCHI15

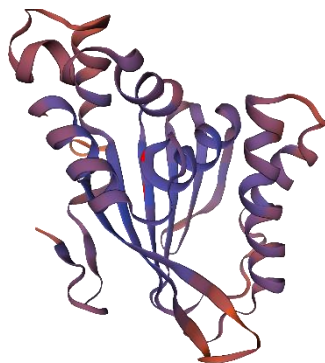

TaCHI16

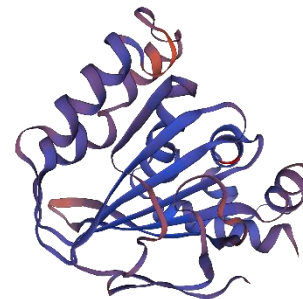

TaCHI17

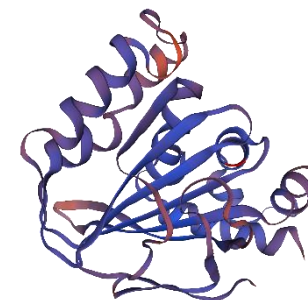

TaCHI18

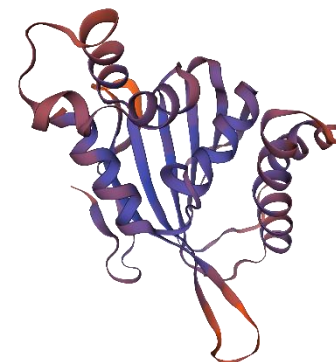



N

ZmCHI1

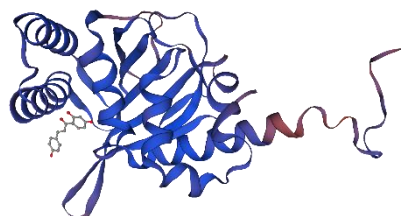

ZmCHI2

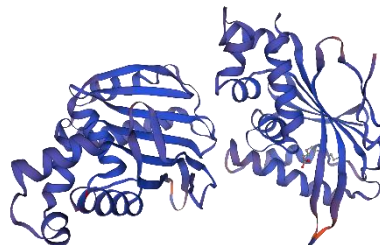

ZmCHI3

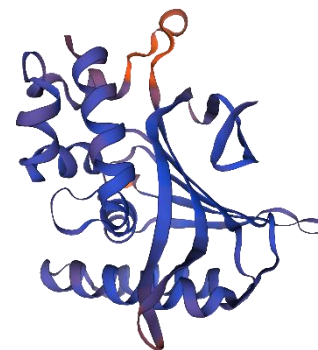

ZmCHI4

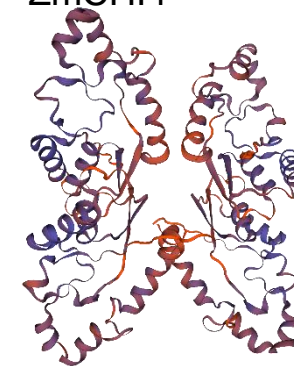

ZmCHI5

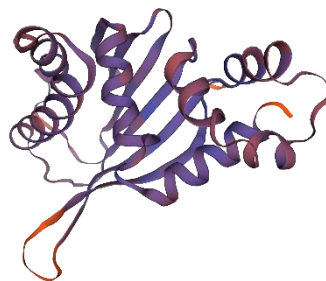

ZmCHI6

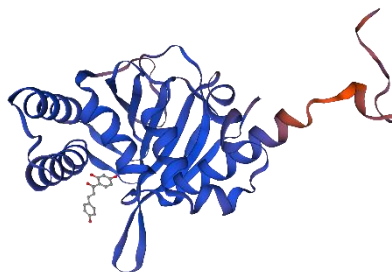

ZmCHI7

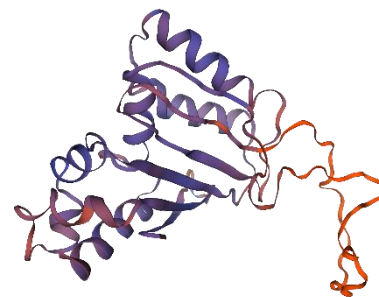

ZmCHI8

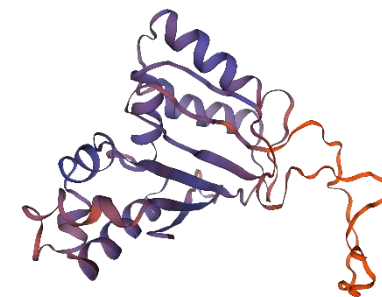

ZmCHI9

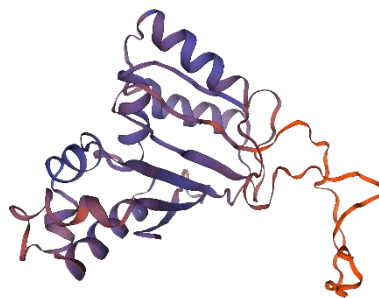

ZmCHI10

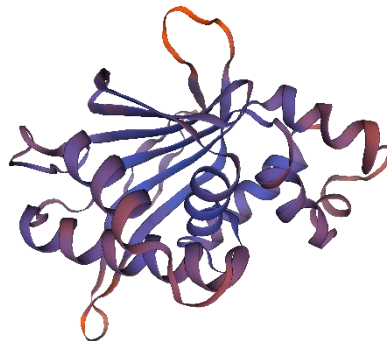



O

PaCHI1

PaCHI2

PaCHI3

PaCHI4

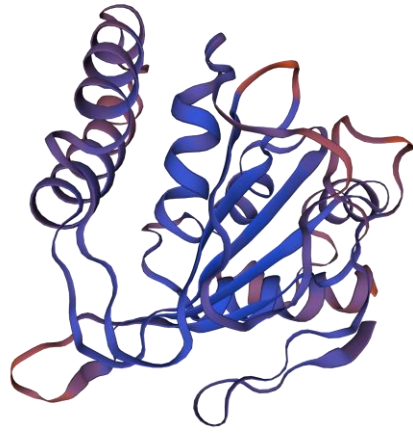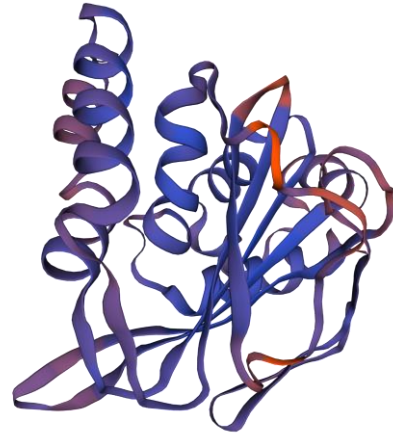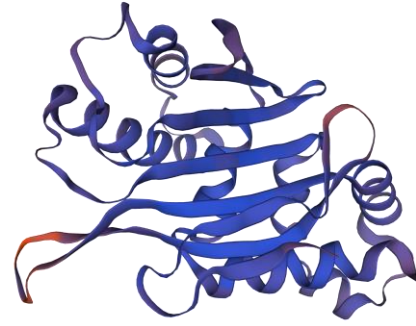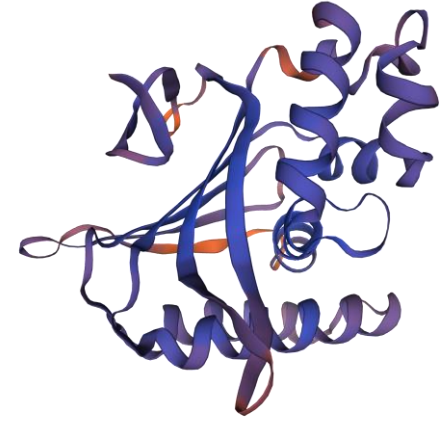

PaCHI5

PaCHI6

PaCHI7

PaCHI8

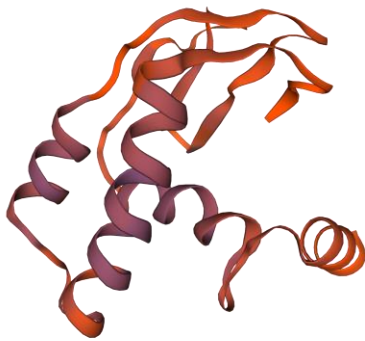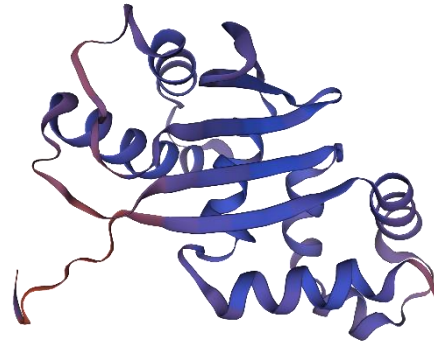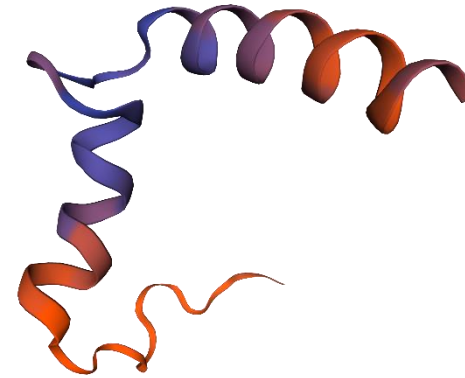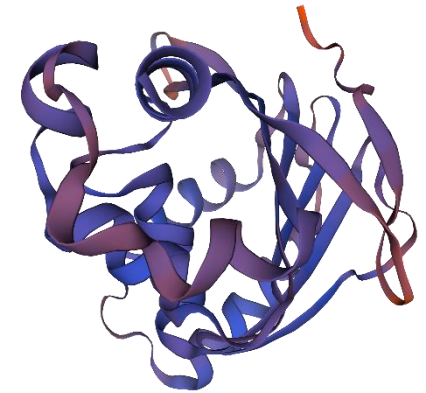

**Supplementary Figure S4.** 3D homology model of 122 CHIs among 15 green plants. A: *O.sativa*. B: *A.thaliana*. C: *C.reinhardtii*. D: *C.sativa*. E: *B.oleracea*. F: *C.quinoa*. G: *C.richardii*. H: *G.max*. I: *P.patens*. J: *P.trichocarpa*. K: *S.lycopersicum*. L: *S.moellendorffii*. M: *T.aestivum*. N: *Z.mays*. O: *P.abies*. The model was built using SWISS-MODEL. Blue colors represent  $\alpha$ -helices and red colors represent  $\beta$ -stranded sheet.  $\alpha$ -helices and  $\beta$ -stranded sheets connected by loops. Ball and stick represent the ligands.
