# Supplementary material for: Genome-Wide Classification and Evolutionary Analysis Reveal Diverged Patterns of Chalcone Isomerase in Plants
Source: MDPI journal article supplement (doi:10.3390/biom12070961), 2022-07-08
Supplement: s1 [file s1]

type II

type I

type IV

FAP3

FAP2

FAP1

Outgroup

|         |                                                                                                                                  |
|---------|----------------------------------------------------------------------------------------------------------------------------------|
| MsCHI   |                                                                                                                                  |
| GmCHI4  |                                                                                                                                  |
| GmCHI11 |                                                                                                                                  |
| GmCHI10 |                                                                                                                                  |
| SmCHI3  |                                                                                                                                  |
| SmCHI5  |                                                                                                                                  |
| CrCHI7  |                                                                                                                                  |
| PaCHI5  |                                                                                                                                  |
| TaCHI16 |                                                                                                                                  |
| PaCHI2  |                                                                                                                                  |
| PaCHI1  |                                                                                                                                  |
| CqCHI5  |                                                                                                                                  |
| ZmCHI1  |                                                                                                                                  |
| ZmCHI6  |                                                                                                                                  |
| OsCHI3  |                                                                                                                                  |
| TaCHI11 |                                                                                                                                  |
| TaCHI9  |                                                                                                                                  |
| TaCHI7  |                                                                                                                                  |
| AtCHI6  |                                                                                                                                  |
| AtCHI7  |                                                                                                                                  |
| GmCHI12 |                                                                                                                                  |
| BoCHI7  |                                                                                                                                  |
| BoCHI5  |                                                                                                                                  |
| AtCHI3  |                                                                                                                                  |
| BoCHI6  |                                                                                                                                  |
| BoCHI4  |                                                                                                                                  |
| CqCHI2  |                                                                                                                                  |
| CqCHI3  |                                                                                                                                  |
| SlCHI2  |                                                                                                                                  |
| SlCHI3  |                                                                                                                                  |
| CsCHI4  |                                                                                                                                  |
| PtCHI3  |                                                                                                                                  |
| AtCHI5  |                                                                                                                                  |
| ZmCHI4  |                                                                                                                                  |
| ZmCHI9  |                                                                                                                                  |
| SmCHI7  |                                                                                                                                  |
| SmCHI1  |                                                                                                                                  |
| CrCHI2  |                                                                                                                                  |
| PpCHI2  |                                                                                                                                  |
| PpCHI7  |                                                                                                                                  |
| PaCHI4  |                                                                                                                                  |
| CqCHI7  |                                                                                                                                  |
| TaCHI6  |                                                                                                                                  |
| TaCHI10 |                                                                                                                                  |
| TaCHI8  |                                                                                                                                  |
| ZmCHI3  |                                                                                                                                  |
| OsCHI6  |                                                                                                                                  |
| OsCHI7  |                                                                                                                                  |
| BoCHI9  |                                                                                                                                  |
| GmCHI2  |                                                                                                                                  |
| GmCHI3  |                                                                                                                                  |
| CsCHI3  |                                                                                                                                  |
| PtCHI6  |                                                                                                                                  |
| SlCHI4  |                                                                                                                                  |
| PpCHI1  |                                                                                                                                  |
| PaCHI7  |                                                                                                                                  |
| AtCHI1  |                                                                                                                                  |
| CrCHI3  |                                                                                                                                  |
| SmCHI2  |                                                                                                                                  |
| SmCHI8  |                                                                                                                                  |
| PpCHI3  |                                                                                                                                  |
| CrCHI8  |                                                                                                                                  |
| TaCHI3  |                                                                                                                                  |
| TaCHI2  |                                                                                                                                  |
| TaCHI1  |                                                                                                                                  |
| ZmCHI7  |                                                                                                                                  |
| OsCHI1  |                                                                                                                                  |
| PaCHI8  |                                                                                                                                  |
| GmCHI5  |                                                                                                                                  |
| GmCHI7  |                                                                                                                                  |
| SlCHI6  |                                                                                                                                  |
| BoCHI3  |                                                                                                                                  |
| CqCHI4  |                                                                                                                                  |
| PtCHI4  |                                                                                                                                  |
| AtCHI2  |                                                                                                                                  |
| CrCHI4  |                                                                                                                                  |
| SmCHI6  |                                                                                                                                  |
| SmCHI4  |                                                                                                                                  |
| PpCHI6  |                                                                                                                                  |
| CrCHI6  |                                                                                                                                  |
| CrCHI1  |                                                                                                                                  |
| ZmCHI5  | MLGVGTAAAVLLGAVALVLADAAARRAHWWYREAAEVVLVGGVALVVVDAAARRAHGWYREAAARLPPGEMGWPLVGGMWAFLRAFKFGRTRTG VYQGFMFSSLTVLMTTAEACKQVLMDEDAFVIG |
| ZmCHI8  | MLGVGTAAAVLLGAVALVLADAAARRAHWWYREAAEVVLVGGVALVVVDAAARRAHGWYREAAARLPPGEMGWPLVGGMWAFLRAFKFGRTRTG VYQGFMFSSLTVLMTTAEACKQVLMDEDAFVIG |
| OsCHI2  |                                                                                                                                  |
| TaCHI2  |                                                                                                                                  |
| TaCHI14 |                                                                                                                                  |
| TaCHI13 |                                                                                                                                  |
| TaCHI15 |                                                                                                                                  |
| TaCHI17 |                                                                                                                                  |
| TaCHI18 |                                                                                                                                  |
| OsCHI4  |                                                                                                                                  |
| ZmCHI10 |                                                                                                                                  |
| CqCHI1  |                                                                                                                                  |
| BoCHI2  |                                                                                                                                  |
| GmCHI6  |                                                                                                                                  |
| GmCHI8  |                                                                                                                                  |
| SlCHI7  |                                                                                                                                  |
| CsCHI2  |                                                                                                                                  |
| PtCHI2  |                                                                                                                                  |
| PtCHI5  |                                                                                                                                  |
| AtCHI4  |                                                                                                                                  |
| PpCHI5  |                                                                                                                                  |
| CrCHI5  |                                                                                                                                  |
| CsCHI5  |                                                                                                                                  |
| SlCHI1  |                                                                                                                                  |
| CrCHI3  |                                                                                                                                  |
| BoCHI8  |                                                                                                                                  |
| BoCHI1  |                                                                                                                                  |
| CqCHI6  |                                                                                                                                  |
| PtCHI1  |                                                                                                                                  |
| ZmCHI2  |                                                                                                                                  |
| OsCHI5  |                                                                                                                                  |
| TaCHI4  |                                                                                                                                  |
| TaCHI5  |                                                                                                                                  |
| SlCHI5  |                                                                                                                                  |
| CsCHI1  |                                                                                                                                  |
| GmCHI1  |                                                                                                                                  |
| GmCHI9  |                                                                                                                                  |
| PpCHI4  |                                                                                                                                  |
| PaCHI3  |                                                                                                                                  |
| PaCHI6  |                                                                                                                                  |
| CrCHI1  |                                                                                                                                  |
| CrCHI2  |                                                                                                                                  |

|          |         |                 |
|----------|---------|-----------------|
| type II  | MsCHI   |                 |
|          | GmCHI4  |                 |
|          | GmCHI11 |                 |
|          | GmCHI10 |                 |
|          | SmCHI3  |                 |
|          | SmCHI5  |                 |
|          | CriCHI7 |                 |
|          | PaCHI5  |                 |
|          | TaCHI16 |                 |
|          | PaCHI2  |                 |
| type I   | PaCHI1  | MDVEGVAFSATVTVP |
|          | CqCHI5  | MDVEGVAFSATVTVP |
|          | ZmCHI1  | MDVEGVAFSATVTVP |
|          | ZmCHI6  | MDVEGVAFSATVTVP |
|          | OsCHI3  | MDVEGVAFSATVTVP |
|          | TaCHI11 | MDVEGVAFSATVTVP |
|          | TaCHI7  | MDVEGVAFSATVTVP |
|          | TaCHI9  | MDVEGVAFSATVTVP |
|          | AtCHI6  | MDVEGVAFSATVTVP |
|          | AtCHI7  | MDVEGVAFSATVTVP |
|          | GmCHI12 |                 |
|          | BoCHI7  |                 |
|          | BoCHI5  |                 |
|          | AtCHI3  |                 |
|          | BoCHI6  |                 |
|          | BoCHI4  |                 |
|          | CqCHI2  |                 |
|          | CqCHI3  |                 |
|          | SlCHI2  |                 |
|          | SlCHI3  |                 |
|          | CsCHI4  |                 |
|          | PtCHI3  |                 |
|          | AtCHI5  |                 |
|          | ZmCHI4  |                 |
|          | ZmCHI9  |                 |
|          | SmCHI7  |                 |
|          | SmCHI1  |                 |
|          | CriCHI2 |                 |
|          | PpCHI2  |                 |
|          | PpCHI7  |                 |
| type IV  | PaCHI4  |                 |
|          | CqCHI7  |                 |
|          | TaCHI6  |                 |
|          | TaCHI10 |                 |
|          | TaCHI8  |                 |
|          | ZmCHI3  |                 |
|          | OsCHI6  |                 |
|          | OsCHI7  |                 |
|          | BoCHI9  |                 |
|          | GmCHI2  |                 |
|          | GmCHI3  |                 |
|          | CsCHI3  |                 |
|          | PtCHI6  |                 |
|          | SlCHI4  |                 |
|          | PpCHI1  |                 |
|          | PaCHI7  |                 |
|          | AtCHI1  |                 |
|          | CrCHI3  |                 |
|          | SmCHI2  |                 |
|          | SmCHI8  |                 |
| FAP3     | PpCHI3  |                 |
|          | CriCHI8 |                 |
|          | TaCHI3  |                 |
|          | TaCHI2  |                 |
|          | TaCHI1  |                 |
|          | ZmCHI7  |                 |
|          | OsCHI1  |                 |
|          | PaCHI8  |                 |
|          | GmCHI5  |                 |
|          | GmCHI7  |                 |
|          | SlCHI6  |                 |
|          | BoCHI3  |                 |
|          | CqCHI4  |                 |
|          | PtCHI4  |                 |
|          | AtCHI2  |                 |
|          | CriCHI4 |                 |
|          | SmCHI6  |                 |
|          | SmCHI4  |                 |
|          | PpCHI6  |                 |
|          | CriCHI6 |                 |
|          | CriCHI1 |                 |
|          | ZmCHI5  | WPKATVALVGRS    |
|          | ZmCHI8  | WPKATVALVGRS    |
|          | OsCHI2  | WPKATVALVGRS    |
|          | TaCHI12 | WPKATVALVGRS    |
|          | TaCHI14 | WPKATVALVGRS    |
|          | TaCHI13 | WPKATVALVGRS    |
|          | TaCHI15 | WPKATVALVGRS    |
|          | TaCHI17 | WPKATVALVGRS    |
|          | TaCHI18 | WPKATVALVGRS    |
| FAP2     | OsCHI4  |                 |
|          | ZmCHI10 |                 |
|          | CqCHI1  |                 |
|          | BoCHI2  |                 |
|          | GmCHI6  |                 |
|          | GmCHI8  |                 |
|          | SlCHI7  |                 |
|          | CsCHI2  |                 |
|          | PtCHI2  |                 |
|          | PtCHI5  |                 |
|          | AtCHI4  |                 |
|          | PpCHI5  |                 |
|          | CriCHI5 |                 |
|          | CsCHI5  |                 |
|          | SlCHI1  |                 |
|          | CriCHI3 |                 |
|          | BoCHI8  |                 |
|          | BoCHI1  |                 |
|          | CqCHI6  |                 |
|          | PtCHI1  |                 |
| FAP1     | ZmCHI2  |                 |
|          | OsCHI5  |                 |
|          | TaCHI4  |                 |
|          | TaCHI5  |                 |
|          | SlCHI5  |                 |
|          | CsCHI1  |                 |
|          | GmCHI1  |                 |
|          | GmCHI9  |                 |
|          | PpCHI4  |                 |
|          | PaCHI3  |                 |
| Outgroup | PaCHI6  |                 |
|          | CrCHI1  |                 |
|          | CrCHI2  | MSEPEGVGMP      |

type II

type I

type IV

FAP3

FAP2

FAP1

Outgroup

|         |                                                                                                                                       |
|---------|---------------------------------------------------------------------------------------------------------------------------------------|
| MsCHI   | .....                                                                                                                                 |
| GmCHI4  | .....                                                                                                                                 |
| GmCHI11 | .....                                                                                                                                 |
| GmCHI10 | .....                                                                                                                                 |
| SmCHI3  | .....                                                                                                                                 |
| SmCHI5  | .....                                                                                                                                 |
| CriCHI7 | .....MSFSFTMTWACGCK.....                                                                                                              |
| PaCHI5  | .....                                                                                                                                 |
| TaCHI16 | .....                                                                                                                                 |
| PaCHI2  | .....                                                                                                                                 |
| PaCHI1  | PHLALKWKDSTAEELGNRVDFYMDIITCPYEKFTRVTLILPLSGAQYSEKVSSEGCKAAWEAAAGIYGEEAEAKAIEQFKDIPQDQNFPPGSSIMFTTSPTRLVIAFSKDGSIPEKAAAVIENRIMAEGV    |
| CqCHI5  | .....                                                                                                                                 |
| ZmCHI3  | .....                                                                                                                                 |
| ZmCHI6  | .....                                                                                                                                 |
| OsCHI3  | .....                                                                                                                                 |
| TaCHI11 | .....                                                                                                                                 |
| TaCHI7  | .....                                                                                                                                 |
| TaCHI9  | .....                                                                                                                                 |
| AtCHI6  | .....                                                                                                                                 |
| AtCHI7  | .....                                                                                                                                 |
| GmCHI12 | .....                                                                                                                                 |
| BoCHI7  | .....                                                                                                                                 |
| BoCHI5  | .....                                                                                                                                 |
| AtCHI3  | .....                                                                                                                                 |
| BoCHI6  | .....MSSSNACAS.....                                                                                                                   |
| BoCHI4  | .....                                                                                                                                 |
| CqCHI2  | .....                                                                                                                                 |
| CqCHI3  | .....                                                                                                                                 |
| SlCHI2  | .....                                                                                                                                 |
| SlCHI3  | .....                                                                                                                                 |
| CsCHI4  | .....                                                                                                                                 |
| PtCHI3  | .....                                                                                                                                 |
| AtCHI5  | .....                                                                                                                                 |
| ZmCHI4  | .....                                                                                                                                 |
| ZmCHI9  | .....                                                                                                                                 |
| SmCHI7  | .....                                                                                                                                 |
| SmCHI1  | .....                                                                                                                                 |
| CriCHI2 | .....                                                                                                                                 |
| PpCHI2  | .....                                                                                                                                 |
| PpCHI7  | .....                                                                                                                                 |
| PaCHI4  | .....MNKQNTDQPNNVWSKPCHPNRRGSSSTTTTYPFFNCYSVLSSALFNKSHSSSPLFIHIIRALPRIQ                                                               |
| CqCHI7  | .....                                                                                                                                 |
| TaCHI6  | .....                                                                                                                                 |
| TaCHI10 | .....                                                                                                                                 |
| TaCHI8  | .....                                                                                                                                 |
| ZmCHI3  | .....                                                                                                                                 |
| OsCHI6  | .....                                                                                                                                 |
| OsCHI7  | .....                                                                                                                                 |
| BoCHI9  | .....                                                                                                                                 |
| GmCHI2  | .....                                                                                                                                 |
| GmCHI3  | .....                                                                                                                                 |
| CsCHI3  | .....                                                                                                                                 |
| PtCHI6  | .....                                                                                                                                 |
| SlCHI4  | .....                                                                                                                                 |
| PpCHI1  | .....                                                                                                                                 |
| PaCHI7  | .....                                                                                                                                 |
| AtCHI1  | .....MDGILAAVPSAVCVSLRISCRNLDNAESIYHFPFGKSLNRVSVLQTGNVY                                                                               |
| CriCHI3 | .....                                                                                                                                 |
| SmCHI2  | .....                                                                                                                                 |
| SmCHI8  | .....                                                                                                                                 |
| PpCHI8  | .....MHYCHYYLGLSIWVLIELHLELGFSVNDRSYLDDLHFSLAMALLSCLRAVCSQISISISLSSSVVAASK                                                            |
| CriCHI8 | .....                                                                                                                                 |
| TaCHI3  | .....MSSSLQSVSIQGLTGG                                                                                                                 |
| TaCHI2  | .....MVVRSPPSKRCAGAAAMMVASVVPSPLAGPALARPGRTRILL                                                                                       |
| TaCHI1  | .....MMVPSVVPAPLAGPALARPVTRTLPPCDLPAGPSLQASAGCRVARGGARR                                                                               |
| ZmCHI2  | .....MMVASVVPSPALARPVTRTLPPCDLPAGPSLQASAGCRVARGGARR                                                                                   |
| OsCHI1  | .....                                                                                                                                 |
| PaCHI1  | .....MSAVPVVSSALAGPAVAVAVARPASGGSVTRLRAPAPHGVAGSVPLASGLA                                                                              |
| GmCHI5  | .....                                                                                                                                 |
| GmCHI7  | .....MLGAVAAASTSLCFSPSTYSTRIVVLLRRISNSTLALNNGHSFLLLSAKPMHFFSSSHKSSRRQPHFL                                                             |
| SlCHI6  | .....MLGAVAAASTSLYFSPSTNSTRIVVLLKRISNSTLPPSNDHSFLLSATPMHFFSSSHKSSRRQPHFL                                                              |
| BoCHI1  | .....MAAGAGISVWLSTSTPTKITAFNSTIPRICYPLKLSRNGIYPL                                                                                      |
| CqCHI4  | .....MDGVVLTSPVYVVICGLSLRSVCLNRVWAGSYHSPNVSVLRTVNCVSSLSHHPKQSSFL                                                                      |
| PtCHI4  | .....                                                                                                                                 |
| AtCHI2  | .....MAMSMCSTQAWNILHHFPLKSPNHPVSLPPYKTHSDFSPSLSTIPLHNNN                                                                               |
| CriCHI4 | .....LFSQLHIPGSLAFEPFSCISKFTGALLCWFSHGNLQKEVSKH.....QWGLTCKSRDLSLKHVFEHRNVSVFPFHVSKDISPGFFGNISKSTIQHFVNEAERLHSCSLLSLAAAMI             |
| SmCHI4  | .....                                                                                                                                 |
| SlCHI4  | .....MPPFEDMSPKVLPNLTESIEIDGL                                                                                                         |
| PpCHI6  | HLSDVSPLSILSSNSISPVPEKLVILGNGVAAVLHAAGAFLLRLLRSRDGDRGSRRRFIKSEKLTLDLKAVNYYTLIRDISPGIITISLCTRGVLSSSFPFSQISSVLEGGWSKLLCYDAAPIVLAAAL     |
| CriCHI6 | .....                                                                                                                                 |
| CriCHI1 | .....SKPIKGEFPGGAWKLALRSTIAVLPTTYIVKSSSRSETTIGKEDLNGTNSQRSPASAGLADSTGAYLSS.....SYSQHLRHLRLECLLMQATFLCSPAASALAAVVM                     |
| ZmCHI5  | RHI..CATGSGTVQEAFCCLNKFABEAFYFWFSRASNPVKLFQRL.SA...AAGSSSRVCRSHIKOVASCLQHLPGLQFG...SOLRKDHAVQMLLARLASATTFGRLWT.EVEEHACNIMLMAA..AATVV  |
| ZmCHI8  | RHI..CATGSGAVQEAFCFNKFAAGAFYFWFSRASNPVKLFQRLSAA...AGSSSRACRSHIKOVTSCLQHLPGLQFG...SOLREDHAVQVLLARLASATTFGRLWTEVEERHACNIMLMAA..ATVI     |
| OsCHI2  | RHI..CSTGNGAVQEAFCFNKFAAGAFYFWFSRASNPVKILHRL.SA...AGSSSRACQSHIKOVTSCLQHLPGLQFG...SOLREDHAVQVLLARLASATTFGRLWTEVEERHACNIMLMAA..AATVV    |
| TaCHI12 | RHL..SSAGSGAVQEAFCSPFNKVAGAFYFCLSRASNPVKILHRL.SA...VAGSGSRACRAHIKOVTSQVQHLAGL.....QVREEHAIQMLLAKLANATLGRVNN.EVEERHACNIMLMAA..ASVI     |
| TaCHI14 | RHA..CSTGSGAVQEAFCFNKVAGAFYFCLSRASNPVKILHRL.SA...IAGSGSRACRAHIKOVTSQVQHLAGL.....QVREEHAIQMLLAKLANATLGRAWN.EVEERHACNIMLMAA..ASVI       |
| TaCHI13 | RHV..CSTGSGAVQEAFCFNKVAGAFYFCLSRATNPVKILHRL.....SATIAGSGSRACRAQIKOVTSQVQHLAGL.....QVREEHAIQMLLAKLANATLGRAWN.EVEERHACNIMLMAA..ASVI     |
| TaCHI15 | REI..CSSGNVKAQEAFCICLRKFARAFFFWFSRAYDPKSPHGF.....SHIKRVTSQVQNLVSGQFASLKEGHAVQVLLARLAQATVGRMWN.DIEQOHASNLLTMAGFAAIV                    |
| TaCHI11 | REI..CFSGNVKAQEAFCICLRKFARAFFFWFSRAYDPKSPHGF.....SHIKRVTSQVQNLVSGQFASLKEGHAVQVLLARLAQATVGRMWN.DIEQOHASNLLTMAGFAAIV                    |
| TaCHI18 | REI..CSSGNVKAQEAFCICLRKFARAFFFWFSRAYDPKSPHGF.....SHIKRVTSQVQNLVSGQFASLKEGHAVQVLLARLAQATVGRMWN.DIEQOHASNLLTMAGFAAIV                    |
| OsCHI4  | RQI..CSSGNLIVQEAFDRLNKFARAFACYVLSRVSNPKNLRL.....MSMEGSPSSGACQSHINHLSRRMQNLAVLQFGYLVREEHAVQVLLANFASATTLGRLWN.DFOQOHACNVLLTAGAMAIV      |
| ZmCHI10 | .....MKPNOLITSHVDIHRFSFPMREEQAVQLILARLASATIGRLN...EQORACNLLTAGAVAIV                                                                   |
| CqCHI1  | KYL..LAPASVALTEAFTCFSKFAGSIVLFFS..GSSQIQTKF..NSDSNLPKPSN...SFGQSKHNAPSTKPYRRLPVTVSCFRFPFHESFAALFGHKFSAFSLRHLFLRAAADVVKFPVLSLA..AALI   |
| BoCHI2  | KRSLHLVPGSLALEAFSCITKFTGAMLCWNNNNNNLQ.....KMEISNYQLRSLSSGDDSSQQRVVKSCYHPNFSLFRIHYGSKDLIPALFBSKSTIQHFVNEAERLHSCSVLSLAVSLMSV            |
| SlCHI5  | .....TNSRSPALAEAFGHVSREFAGALLFWLSRASNNLARS.LRG.SPPLRFGS...VOVKA..YSTNVVFGPFPFG...SKWK..SSFSVRLGKISLAMRMWR.EAKRLSFPVLSLA..VAIV         |
| GmCHI8  | .....NNRSPALAEAFGHVSREFAGALLFWLSRASNNLARS.LRG.SPPLRFGS...VOVKA..YSTNVVFGPFPFG...LKKK..SPFASVRLGKISLAMRMWR.EAKRLSFPVLSLA..VAIV         |
| CqCHI6  | RNL..YVPGSQALQEAFCFKCFSKYAGALLVVFATVTNNSRGNNQI..SGGYRSSRNRTRSGMSIQTOETSSRHYPFMEFLWO...SRCKGKIIPVPIFRRISKFTVMQMYK.EAKHLQSPVLSLA..AALV  |
| SlCHI7  | SHLSSIPGSLAI..EGFNHHTAKLAGAILFVLVSSGSSVNI..REI..SGSPHGSKTRSCTSFSQVKHITSSRQNFKKFCFS...FRSQGDSRMPVPIFGKISSFPVSKLVPR.EAERLQSPVLSLA..AALV |
| CsCHI2  | GFL..HVPETMAFQEAALNHVSKLAGGLIFWFTSASSSNLSRQI..SGNQSRSPRPGSCKSPAQVKNSTSTRHDLAGLQFG...SISKGESSHPVVFPSKIISNFVMRLLR.EAERLQSPVLSLA..AALI   |
| PtCHI5  | RFL..HVPETMAFQEAALNHVSKLAGGLIFWFTSASSSNLSRQI..SGNQISPTPGSCRSSAQVKNSTSTRCDLQAGLQFG...FVSKVSSPPVVSSTISSFVMRLLLG.EAERLQSPVLSLA..ASIV     |
| AtCHI4  | .....MVSFRFPFSPSQPPRATTSFSGFSISAVAVSVTVGAAAGAATAASRNPSHPILLEWAFSSHRSL                                                                 |
| PpCHI5  | .....MAMASRNMGILLAIL                                                                                                                  |
| CriCHI5 | .....MAWRVUNGLATPLATLAAIQOQSYTVLLE                                                                                                    |
| CsCHI5  | .....MAT                                                                                                                              |
| SlCHI1  | .....MPTTMDVTAKIDAVEIDSQSVVVALKEKAIIEGVKTTTETQEKITNEAKSN                                                                              |
| CriCHI3 | .....MAASFYSYFFGNVFANAPLWKKVSVGAGVAAASGMVAEEIYNRQNGFSAIASLSLDEFAFSGFMHNSL                                                             |
| BoCHI8  | .....MVRRGGHVGNSSSSSTSSSLNHIKGVCLSVLMRECNERTKTKTNTSHLPNTRMLRSLASRFLSPLSPNHR                                                           |
| BoCHI1  | .....MVSFRFPFSPSQPSLPKPPRATSSSSSFSVSAVAVTLTVGAAAVAAASRNPHITLDWVFSHRSSL                                                                |
| CqCHI6  | .....MGSIRFPFSSFPFPFPNPKPSATSLRLLLAAGASIAAGACAGIAITQNSDKHIPILQNTDLFLLH                                                                |
| PtCHI1  | .....MVSIRFPFPLFSQPKKHNGPISRTITSRSPFATTTTACALAGAAGAFAGIAATRNSKNPKQDNPFQ                                                               |
| ZmCHI2  | .....MVSIRFPPTAAIPRLPPSQAPNGVAIAATAVAAAAAANAASLTLTGKSTGRPVPHPA                                                                        |
| OsCHI5  | .....MVSIRFPATFPRLPPPPPPPSRPAFAAALAAAAA                                                                                               |
| TaCHI4  | .....MVSIRFPATFPRLPPPPPPPSRPAFAAALAAAAA                                                                                               |
| TaCHI5  | .....MVSIRFPATFPRLPPPPPPPSRPAFAAALAAAAA                                                                                               |
| SlCHI5  | .....MASIRFPFPLFPQPHKTPSSATSDAPSRSPSTVAVAVASGGSGALAAAGAITAITQSPKNPFLENANLILSNF                                                        |
| CsCHI1  | .....MVSIRFPFSPSQSSTSTLPSPNSPFPFRASTLAVTVAAATAAVATIAATAAASASTKDTGATPNPKHPF                                                            |
| GmCHI1  | .....MSSMLRFPFSPFLQOPRQOPRPFPTAFAAAAAVSSSDRSFLRNALNSFFSVNPSM                                                                          |
| GmCHI9  | .....MSSMLRFPFSPFPQRRKQFPFPPTAFAAAAVAGASAAVAVVSSSDRSFLRNALNSFFSDLSM                                                                   |
| PpCHI4  | .....MNAVPPSPSSSSSFPFTGVTSFVKNGGVPQRWRAAGAGAGVGLGALTTPV                                                                               |
| PaCHI3  | .....MASSILPLPLNPNSPQIPRHSSSTPTSSSTSSSIRCLAVTLGVGIGVGLVAPHLAKQRNWWAQSLRDV                                                             |
| PaCHI6  | .....                                                                                                                                 |
| CriCHI1 | .....MVGFTETRDGFAIPTGNAGQSDSLKPFENKFWASARAAPM                                                                                         |
| CriCHI2 | GQFTLGRRRRGPLKRFYKIALKTFTFGLAGRGGRGGAVGARRRRGRGARGPPLASLSAAILEPADVDLDDGYGPSTGQPLALTTTGVPGMSVTLTPAGVASFPFLATLPVPHDSEVPGLVEHSHIR        |

type II

type I

type IV

FAP3

FAP2

FAP1

Outgroup

|         |                  | 1                          | 10                           | 20                           | 30                  |
|---------|------------------|----------------------------|------------------------------|------------------------------|---------------------|
| MsCH1   | .....            | ..M...AASITAITVENL         | EVFA.VV                      | ..TSPVTGK                    | ..SYFLGGA           |
| GmCH14  | .....            | ..MAT..PASITNVTVEFI        | QFFA.VV                      | ..TPPASTK                    | ..SYFLGGA           |
| GmCH111 | .....            | ..MAT..PASITNVTVEFI        | QFFA.LV                      | ..TPPGSTK                    | ..SYFLGGA           |
| GmCH110 | .....            | ..MAT..MATISAVQVEFI        | EVFA.VV                      | ..TSPASGK                    | ..TYFLGGA           |
| SmCH13  | .....            | ..MAP..ELLKQGLVIEG         | TFPP.GL                      | ..TSPVSQK                    | ..SLFLGGA           |
| SmCH15  | .....            | ..MAP..ELLKQGLVIEG         | TFPP.GL                      | ..TSPVSQK                    | ..SLFLGGA           |
| Cr1CH17 | .....            | ..QIDFGSLGSL               | TFFA.SI                      | ..TLTGSTT                    | ..ELILGGA           |
| PaCH15  | .....            | ..MFI..                    |                              | ..                           | ..RPSLAIN           |
| TaCH116 | .....MED         | ..TTF..PAGITDMEVGRV        | VVFGA.SA                     | ..TPPHSSK                    | ..ILFLGGA           |
| PaCH12  | AFSELVFCFCFKSSXS | NLSAVAAM                   | ..SSA..VASVVSMEVEG           | VVTFSP.TV                    | ..TPRTSSK           |
| PaCH11  | LASIIGKSGSVSPPAK | ASIAIDRVSKLYPFELD          | ..HCF..ATVLNGVELEG           | IAFFPP.TV                    | ..RPPGGTK           |
| CqCH15  | .....            | ..MAVPEVVVDG               | VVFFP.VA                     | ..RPPGSAG                    | ..SHFLGGA           |
| ZmCH11  | .....            | ..MAVPEVVVDG               | VVFFP.VA                     | ..RPPGSAG                    | ..SHFLGGA           |
| ZmCH16  | .....            | ..MAVPEVVVDG               | VVFFP.VA                     | ..RPPGSAG                    | ..SHFLGGA           |
| OsCH13  | .....            | ..MAVSEVVDG                | VVFFP.VA                     | ..RPPGSAGH                   | ..AHFLGGA           |
| TaCH111 | .....            | ..MAVSEVVDG                | VVFFP.VA                     | ..RPPGSAGH                   | ..AHFLGGA           |
| TaCH17  | .....            | ..MAVSEVVDG                | VVFFP.VA                     | ..RPPGSAGH                   | ..AHFLGGA           |
| TaCH19  | .....            | ..MAVSEVVDG                | VVFFP.VA                     | ..RPPGSAGH                   | ..AHFLGGA           |
| AtCH16  | .....            | ..MP..LPSTPLHVDAT          | TFPP.AV                      | ..ESFASHK                    | ..RLFLGGA           |
| AtCH17  | .....            | .....                      | .....                        | .....                        | .....               |
| GmCH112 | .....            | ..MAMA..FPSVTSVTIVEN       | VTFPP.TV                     | ..KPPCSFN                    | ..TFFLAGA           |
| BoCH17  | ..MFDQIIISSGV    | ..QSP..LPSVTNLQVDS         | VNFPP.SV                     | ..ISPASSN                    | ..RLFLGGA           |
| BoCH15  | .....MFSSGS      | ..QLO..LPSVTNLQVDS         | VNFPP.SV                     | ..ISPASSN                    | ..PLFLGGA           |
| AtCH13  | .....            | ..PSP..FPAVTKLHVD          | TFPP.SV                      | ..KSPASSN                    | ..PLFLGGA           |
| BoCH16  | .....            | ..PSP..LPTVTKLQVDS         | VTFPP.SV                     | ..ISPASSN                    | ..PLFLGGA           |
| BoCH14  | .....MSSSHC      | ..PTP..LPSVTKLQVDS         | VTFPP.SV                     | ..ISPASSN                    | ..PLFLGGA           |
| CqCH12  | .....            | ..MGT..STGVSEVKVED         | VVFFA.TV                     | ..KAPGSDN                    | ..SFFLAGAG          |
| CqCH13  | .....            | ..MAT..STPVTTEVKVED        | VVFFP.TV                     | ..KAPGSDK                    | ..SFFLAGAG          |
| SlCH12  | .....            | ..MACVTKLQVENN             | VVFFPSKV                     | ..KPPSSNN                    | ..TFFLAGA           |
| SlCH13  | .....            | ..MNLS..PLTSSGQIEA         | AKFFP.AV                     | ..KPPGLDK                    | ..TLFLGGA           |
| CsCH14  | .....            | ..MSP..AVPLSEIQIEN         | VTFPP.AV                     | ..KPPASNN                    | ..TLFLGGA           |
| PtCH13  | .....            | ..MGT..MGTEMVMVHE          | VVFFP.OI                     | ..I..T.SK                    | ..PLSLLGQ           |
| AtCH15  | .....            | ..MSPLHPPPRDA              | TFPPS.AI                     | ..PPPSRRIPSS                 | ..PPPLSAL           |
| ZmCH14  | .....            | ..MSPLHPPPRDA              | TFPPS.AI                     | ..PPPSRRIPSS                 | ..PPPLSAL           |
| ZmCH19  | .....            | ..MEMD..TFQA..SI           |                              | ..QSPSSSE                    | ..TLILLGH           |
| SmCH17  | .....            | ..MGSECVVFE                | GGSSFFM.AV                   | ..SPPASSK                    | ..TLVLLGN           |
| Cr1CH12 | .....            | ..MGLQVNVNEG               | DDFAT.KF                     | ..APPTSTT                    | ..ELDILGH           |
| PpCH12  | .....            | ..MGSPQVVKVED              | DDFAT.KF                     | ..TPPTGST                    | ..ELDLIGY           |
| PaCH14  | QYPPIRPISSVLT    | YICSLASSSI                 | ..DRP..KMASEVVMYDE           | TFPPK.SI                     | ..APTASK            |
| CqCH17  | .....            | ..GSEQE..KKAATAVE          | EGTFPPR.EI                   | ..A..G.AK                    | ..ALSLVGH           |
| TaCH16  | .....            | ..GSEQE..KKAATAVE          | EGTFPPR.EI                   | ..A..G.AK                    | ..ALSLVGH           |
| TaCH110 | .....            | ..GSEQE..KKAATAVE          | EGTFPPR.EI                   | ..A..G.AK                    | ..ALSLVGH           |
| TaCH18  | .....            | ..GSEQE..KKAATAVE          | EGTFPPR.EI                   | ..A..G.AK                    | ..ALSLVGH           |
| ZmCH13  | .....            | ..TETVNVNEG                | TFPPA.EI                     | ..T..V.GN                    | ..TSLVLGT           |
| OsCH16  | .....            | ..GTEIATVE                 | VEGTFPP.OI                   | ..TVSK                       | ..PLSLLAN           |
| OsCH17  | .....            | ..MGTEIVMHE                | VVFFP.OI                     | ..I..T.SK                    | ..PLSLLGH           |
| BoCH19  | .....            | ..MATEEVLD                 | VEITTFPS.KI                  | ..TTTK                       | ..PLSLLGH           |
| GmCH12  | .....            | ..MATEEVLD                 | VEITTFPS.KI                  | ..TTTK                       | ..PLSLLGH           |
| GmCH13  | .....            | ..MANNMVMVHE               | VTFPP.TE                     | ..KTTK                       | ..PLSLLGY           |
| PtCH16  | .....            | ..MVNVDE                   | TFPPF.EI                     | ..QIAIATK                    | ..PLSLLGH           |
| SlCH14  | .....            | ..VKNSEVMYDE               | TFPPF.OI                     | ..M.VN.NK                    | ..PLFMGH            |
| PpCH11  | .....            | ..MGSPQVNVNEG              | DDFAT.KF                     | .....                        | .....               |
| PaCH17  | .....            | ..IAP..WKDSWSVPEKA         | IAV.VI                       | ..ENRILAE                    | ..PLVLGT            |
| AtCH11  | SRKGNLSLLKNRHC   | GEISRVIKSAASS              | ..VGN..AEDYAEETATS           | VKKFRR.SV                    | ..TLFGCSS           |
| CrCH13  | CPPAALRSRPA      | AVSRGACQPV                 | ..ASLTVRKDAQSG               | VEYD.LA                      | ..QKFWQGE           |
| SmCH12  | .....            | .....                      | .....                        | .....                        | ..FAGA              |
| SmCH18  | .....            | ..AVG..ADNVVTEPAT          | SKFFAL.LL                    | ..TVPDSN                     | ..TLTFLGA           |
| PpCH13  | PASRTNATKCGS     | ARLQSSLVAGSQL              | .....GTSSILSVTAKSKVSVNKLGVRA | .....                        | ..MLL               |
| Cr1CH18 | VQPLLGLLSSRP     | QVQPCYRINTSVPHLSAYQVPSKQIV | ..ITC..SEKVKVERTN            | VSFT.SL                      | ..EAPGGST           |
| PtCH12  | PPCDLPAGSS       | LQASAGCRIA                 | RGGARRPQHSFAAGG              | ..GAE..GDAFVVEGATN           | VKKFRR.EL           |
| TaCH12  | PQHISFAAGGG      | AA                         | .....                        | ..GDAFVVEGATN                | VKKFRR.EL           |
| TaCH11  | PQHISFAAGGG      | AA                         | .....                        | ..GDAFVVEGATN                | VKKFRR.EL           |
| AtCH17  | .....MLGW        | .....                      | .....                        | ..GTV..GDAFVIED              | TNTNKKFPR.EI        |
| OsCH11  | NCYRRSAAAA       | ARRLP                      | IPPSAAGG                     | .....                        | ..AVPGYTE           |
| PaCH18  | .....            | .....                      | .....                        | ..MPYRATVSYKH                | GLLLT.RI            |
| GmCH15  | AQAAAASSG        | MLALSWKMMNNADWGINF         | .....KAVV..NAEYVEEP          | ATNKKFOT.SL                  | ..SFPGCSN           |
| GmCH17  | AQAASSAA         | .....                      | .....NAEYVEEP                | ATNKKFOT.SL                  | ..SFPGCSN           |
| SlCH16  | STFERNGQ         | VEQNLTIKAAASS              | .....SVG..SAEYTEPAT          | NKKFOT.SL                    | ..SFPGCSN           |
| BoCH13  | RKNRCVATS        | RIVVKAAASSVGN              | .....A..NAEYAE               | EATNKKFOT.SL                 | ..SFPGCSN           |
| CqCH14  | .....            | .....                      | .....A..NAEYAE               | EATNKKFOT.SL                 | ..SFPGCSN           |
| PtCH14  | STPTHLSPK        | ASSSSSSSSSSSF              | .....SVG..SAEYTE             | EATNKKFOT.SL                 | ..SFPGCSN           |
| AtCH12  | PSLNVM           | SANGALALPLGSDNDVKLR        | ENIEHRTCPENTEHR              | TCQVGC                       | EYSGSL              |
| Cr1CH14 | DEKEDLLE         | QVSAMRVQDY                 | .....TFS..TESFVIE            | PKTGKFFTYLE                  | PVGYKDRLDGGSL       |
| SmCH16  | .....            | .....                      | .....                        | .....                        | ..MOVLCGV           |
| SmCH14  | .....            | .....                      | .....                        | .....                        | ..MOVLCGV           |
| PpCH16  | PFSSSLAFQ        | YGQDAPGV                   | DNC                          | DGALFGLP                     | .....SCN..SQAVV     |
| Cr1CH16 | .....            | .....                      | .....                        | .....                        | ..MDM..SENVSEPT     |
| Cr1CH11 | PSLENIP          | SKMLSNQLDKAGNV             | MGNK                         | .....EDFP                    | EEKVATVDIPHMSKHTFDK |
| ZmCH15  | PFENN            | .....                      | .....                        | .....                        | ..RVL..LPEDTE       |
| ZmCH18  | PFENISPK         | MLAASMAIRKDR               | NIETP                        | .....                        | ..RVL..LPEDTE       |
| PpCH12  | PFENISPK         | MLADSM                     | TLGRDNGRTEP                  | .....                        | ..RVL..LPEDTE       |
| TaCH112 | PFENISPK         | MLADSM                     | TLGRDNGRTEP                  | .....                        | ..RVL..LPEDTE       |
| TaCH114 | PFENISPK         | MLADSM                     | TLGRDNGRTEP                  | .....                        | ..RVL..LPEDTE       |
| TaCH11  | PFENISPK         | MLADSM                     | TLGRDNGRTEP                  | .....                        | ..RVL..LPEDTE       |
| TaCH115 | PFENISPK         | MLAELITFG                  | NVDGYNMP                     | .....                        | ..TTI..FQEDAVE      |
| TaCH117 | PFENISPK         | MLAELMV                    | FNGVDGYNMP                   | .....                        | ..TTI..FQEDAVE      |
| AtCH18  | PFENISPK         | MLAELMA                    | FNGVDGYNMP                   | .....                        | ..TTI..FQEDAVE      |
| OsCH14  | PLENISL          | SKTLAESMALGN               | IKRDYVSRPMDKPYLEDK           | CIKRSRV                      | .....AVPSTI         |
| PtCH110 | PLENISS          | MLAESITSRN                 | IDS                          | DIRRL                        | .....STI..FQEDPI    |
| CqCH11  | PLDHF            | TPSM                       | LITIPPEDAD                   | TQVLASM                      | .....EFK..WLRD      |
| BoCH12  | NGLGLSLG         | SDDDVQVSSNNV               | EHRS                         | CQVGRNGL                     | .....SPFKLD         |
| GmCH16  | PPQNLS           | SNVLASPL                   | LLNP                         | DVOIFGAM                     | .....ELS..QARPA     |
| GmCH18  | PPQNLS           | SNVLASPL                   | LLNP                         | DVOIFGAM                     | .....ELS..QARPA     |
| SlCH17  | PPENFA           | .....                      | .....                        | .....                        | ..NLN..WSRHAVE      |
| CsCH12  | PLDNL            | ISSKVLTA                   | PL                           | ENDVVMV                      | .....DLN..WRRHVE    |
| PtCH12  | PPFGN            | LSKLLAIP                   | GENDDVP                      | VHAST                        | .....DLN..WRRHVE    |
| PtCH15  | PPFDNL           | ASKVLAIP                   | LE                           | NDVQVHAST                    | .....DLN..WRRHVE    |
| AtCH14  | SWG              | SITL                       | .....                        | .....                        | ..SNA..YENK         |
| PpCH15  | PLLSN            | SHDAVLSH                   | .....                        | .....                        | ..SNA..YENK         |
| Cr1CH15 | P                | .....                      | .....                        | .....                        | ..SNA..YENK         |
| CsCH15  | SDGSS            | NAAT                       | ..K                          | .....                        | ..SNA..YENK         |
| SlCH11  | PEKES            | NGATFKEE                   | .....                        | .....                        | ..SNA..YENK         |
| Cr1CH13 | PNRSV            | IPFACLSPL                  | .....                        | .....                        | ..SNA..YENK         |
| BoCH18  | PRRHL            | SVSAVA                     | VT                           | VGGAAIVA                     | .....SRN..SVSP      |
| BoCH11  | LMWGS            | ITL                        | .....                        | .....                        | ..SRN..SVSP         |
| CqCH16  | LPFT             | PNAPF                      | WGCL                         | SLSSDV                       | .....ADS..SSES      |
| PtCH11  | NALN             | LLFSNHLLAP                 | WASLSLAD                     | .....                        | ..ADS..SSES         |
| ZmCH12  | PLWAS            | LSL                        | .....                        | .....                        | ..ADS..SSES         |
| OsCH15  | AAAAS            | LT                         | LAKS                         | AGRPPLP                      | .....HPA..PLWAS     |
| TaCH15  | SLWAS            | LSL                        | ..ADS                        | .....                        | ..HPA..PLWAS        |
| TaCH15  | PLWAS            | LSL                        | LAES                         | .....                        | ..HPA..PLWAS        |
| SlCH15  | SPNKN            | HSSPLWGS                   | SVS                          | .....                        | ..LAD..NSAP         |
| CsCH11  | LQEA             | NL                         | FFPANRSLPLWGS                | LSL                          | .....LAN..SADP      |
| GmCH11  | PLLG             | SL                         | SLAD                         | .....                        | ..LAN..SADP         |
| GmCH19  | PLWGS            | LSL                        | AD                           | .....                        | ..LAN..SADP         |
| PpCH14  | APHKLA           | AAREL                      | WRGLSS                       | WKCDVSRFASIA                 | .....WAE..PVE       |
| PaCH13  | CAQRK            | RAPS                       | YFWG                         | PLIACLSLAT                   | .....EVSQ           |
| PaCH16  | .....            | .....                      | .....                        | .....                        | ..MO                |
| CrCH11  | TFPAS            | LSAS                       | ILGGLG                       | .....                        | ..KPG..SAGGR        |
| CrCH12  | SLHYHGHAEHL      | AHNNQ                      | QNLSQLWNR                    | ARQPHHAHAQPHQTSHHQATQLCTCGGA | .....STG..MDCS      |



type II

type I

type IV

FAP3

FAP2

FAP1

Outgroup

|         |                 | 110     | 120     |                                                                                                           | 130    | 140                  |
|---------|-----------------|---------|---------|-----------------------------------------------------------------------------------------------------------|--------|----------------------|
| MsCHI   | GPEYSRK         | ..VMEN  | GAH     | ILKSVGTG                                                                                                  | ..DAE  | ..AEAMOKFAEAKPV      |
| GmCHI4  | GREYVRK         | ..VSEN  | CAH     | MSVSGTYS                                                                                                  | ..EAE  | ..EKATEEERNNAFKDQ    |
| GmCHI11 | GREYVRK         | ..VSEN  | CAH     | MSVSGTYS                                                                                                  | ..DEE  | ..EKATEEERNNAFKDQ    |
| GmCHI10 | GAEYSKK         | ..VMEN  | CAH     | MSVSGTYS                                                                                                  | ..DAE  | ..AAATEEERNAFAKNV    |
| SmCHI3  | GTFDSKK         | ..VMEN  | KQV     | LAESNSLG                                                                                                  | ..EDE  | ..EKATEEERNNAFKDQ    |
| SmCHI5  | GTGFSKK         | ..VMEN  | KQV     | LAESNSLG                                                                                                  | ..EDE  | ..EKATEEERNNAFKDQ    |
| CrCHI7  | GPQYSEK         | ..VVER  | IGL     | IENSGVKE                                                                                                  | ..KVE  | ..ESKLELEIFKTE       |
| PaCHI5  | .....           | ..AEG   | CAW     | ETAGIYG                                                                                                   | ..KVE  | ..AVATEE...FKDQN     |
| TaCHI16 | GQEYSDK         | ..VTEN  | VNI     | WKSSEHY                                                                                                   | ..VDE  | ..GHGSAAATSEILKGIYPA |
| PaCHI2  | GVEFCRK         | ..VSEN  | CAH     | ESAGIYS                                                                                                   | ..EAE  | ..EKATEEERNNAFKDQ    |
| PaCHI1  | GIOYTEK         | ..VTEG  | CAW     | EAGIYG                                                                                                    | ..KAE  | ..AAATEEERNAFAKNV    |
| CqCHI5  | GQYVSNK         | ..LTEN  | CAW     | KATGIYT                                                                                                   | ..DEE  | ..EKATEEERNNAFKDQ    |
| ZmCHI1  | GEQYAEK         | ..VTEN  | CAW     | KAAAGLYT                                                                                                  | ..DAE  | ..GVAVEKFRVFKPE      |
| ZmCHI6  | GEQYAGK         | ..VAEN  | CAW     | KAAAGLYT                                                                                                  | ..DAE  | ..GVAVEKFRVFKPE      |
| OsCHI3  | GEQYSDK         | ..VTEN  | CAW     | KAAAGLYT                                                                                                  | ..DAE  | ..GVAVEKFRVFKPE      |
| TaCHI11 | GAQYSDK         | ..VTEN  | CAW     | KATGIYT                                                                                                   | ..DAE  | ..AAATEEERNAFAKNV    |
| TaCHI7  | GAQYSDK         | ..VTEN  | CAW     | KAAAGLYT                                                                                                  | ..DAE  | ..AAATEEERNAFAKNV    |
| TaCHI9  | GAQYSDK         | ..VTEN  | CAW     | KATGIYT                                                                                                   | ..DAE  | ..AAATEEERNAFAKNV    |
| AtCHI6  | GIOYSEK         | ..VVEN  | EEI     | MKASGKYT                                                                                                  | ..RSE  | ..AKADDOFLMVFKNQ     |
| AtCHI7  | GIOYSEK         | ..VVEN  | EEI     | MKASGKYT                                                                                                  | ..RSE  | ..AKADDOFLMVFKNQ     |
| GmCHI12 | GQOYSEK         | ..VAEN  | CAW     | WKSIGIYT                                                                                                  | ..DSE  | ..AKADDOFLMVFKNQ     |
| BoCHI7  | GQOYSEK         | ..VTEN  | CAW     | WKSIGIYT                                                                                                  | ..DSE  | ..AKADDOFLMVFKNQ     |
| BoCHI5  | GQYVSNK         | ..LTEN  | CAW     | KATGIYT                                                                                                   | ..DEE  | ..EKATEEERNNAFKDQ    |
| AtCHI3  | GQOYSEK         | ..VTEN  | CAW     | KATGIYT                                                                                                   | ..DSE  | ..AKADDOFLMVFKNQ     |
| BoCHI6  | GQOYSEK         | ..VTEN  | CAW     | KATGIYT                                                                                                   | ..DSE  | ..AKADDOFLMVFKNQ     |
| BoCHI4  | GQOYSEK         | ..VTEN  | CAW     | KATGIYT                                                                                                   | ..DSE  | ..AKADDOFLMVFKNQ     |
| CqCHI2  | .....           | ..      | CAW     | KATGIYT                                                                                                   | ..DSE  | ..AKADDOFLMVFKNQ     |
| CqCHI3  | GQOYSEK         | ..VTEN  | CAW     | KATGIYT                                                                                                   | ..DSE  | ..AKADDOFLMVFKNQ     |
| SlCHI2  | GKQYSEK         | ..VAEN  | CAW     | KATGIYT                                                                                                   | ..DSE  | ..AKADDOFLMVFKNQ     |
| SlCHI3  | GKQYSEK         | ..VAEN  | CAW     | KATGIYT                                                                                                   | ..DSE  | ..AKADDOFLMVFKNQ     |
| CsCHI4  | GKQYSEK         | ..VAEN  | CAW     | KATGIYT                                                                                                   | ..DSE  | ..AKADDOFLMVFKNQ     |
| PtCHI3  | GLOYSEK         | ..VAEN  | CAW     | KATGIYT                                                                                                   | ..DSE  | ..AKADDOFLMVFKNQ     |
| AtCHI5  | GAQYGVQ         | ..LENT  | RDR     | LAEDDKYE                                                                                                  | ..EEE  | ..EATEEERNAFAKNV     |
| ZmCHI4  | GESLWNEKNLFTGCC | ..VDP   | ELTPKGV | EEAIEAGKRICNIPIDVIYTSSLIHAQMTAMLAMMOHRHKKVCFVFPFKFYGELGQNLNKOETVDRFRGKEQVHEWRRSYDIPPPNGESLEBKAKRAVAYFKDQV | ..DAE  | ..EKATEEERNNAFKDQ    |
| ZmCHI9  | GESLWNEKNLFTGCC | ..VDP   | ELTPKGV | EEAIEAGKRICNIPIDVIYTSSLIHAQMTAMLAMMOHRHKKVCFVFPFKFYGELGQNLNKOETVDRFRGKEQVHEWRRSYDIPPPNGESLEBKAKRAVAYFKDQV | ..DAE  | ..EKATEEERNNAFKDQ    |
| SmCHI7  | GSQYAST         | ..IETS  | RDR     | LAYDDKYE                                                                                                  | ..EDE  | ..EATEEERNAFAKNV     |
| SmCHI1  | GSQYAST         | ..IETS  | RDR     | LAYDDKYE                                                                                                  | ..EDE  | ..EATEEERNAFAKNV     |
| CrCHI12 | GSQFVTP         | ..LQST  | RDR     | LAYADLYE                                                                                                  | ..DEE  | ..EATEEERNAFAKNV     |
| PpCHI2  | GLPYGSA         | ..LQSS  | RDR     | LVNDDKFE                                                                                                  | ..DEE  | ..EATEEERNAFAKNV     |
| PpCHI7  | GLPYGSA         | ..LQSS  | RDR     | LVNDDKFE                                                                                                  | ..DEE  | ..EATEEERNAFAKNV     |
| PaCHI4  | GAALFSSA        | ..LNDEL | KPR     | KSSPEGE                                                                                                   | ..DEE  | ..EATEEERNAFAKNV     |
| CqCHI7  | ASOLGTO         | ..LEGAV | RDR     | LAADKYE                                                                                                   | ..DEE  | ..EATEEERNAFAKNV     |
| TaCHI6  | GSQYGVQ         | ..LESS  | RDR     | LVAADKYE                                                                                                  | ..DEE  | ..EATEEERNAFAKNV     |
| TaCHI10 | GSQYGVQ         | ..LESS  | RDR     | LVAADKYE                                                                                                  | ..DEE  | ..EATEEERNAFAKNV     |
| TaCHI8  | GSQYGVQ         | ..LESS  | RDR     | LVAADKYE                                                                                                  | ..DEE  | ..EATEEERNAFAKNV     |
| ZmCHI3  | GSQYGVQ         | ..LESS  | RDR     | LVAADKYE                                                                                                  | ..DEE  | ..EATEEERNAFAKNV     |
| OsCHI6  | GSQYGVQ         | ..LESS  | RDR     | LVAADKYE                                                                                                  | ..DEE  | ..EATEEERNAFAKNV     |
| OsCHI7  | GSQYGVQ         | ..LESS  | RDR     | LVAADKYE                                                                                                  | ..DEE  | ..EATEEERNAFAKNV     |
| BoCHI9  | GAQYGVQ         | ..LENS  | RDR     | LVAADKYE                                                                                                  | ..DEE  | ..EATEEERNAFAKNV     |
| GmCHI2  | GAQYGVQ         | ..IETA  | RDR     | LVAADKYE                                                                                                  | ..DEE  | ..EATEEERNAFAKNV     |
| GmCHI3  | GAQYGVQ         | ..IETA  | RDR     | LVAADKYE                                                                                                  | ..DEE  | ..EATEEERNAFAKNV     |
| CsCHI3  | GSQYGVQ         | ..LESS  | RDR     | LVAADKYE                                                                                                  | ..DEE  | ..EATEEERNAFAKNV     |
| PtCHI6  | GSQYGVQ         | ..LESS  | RDR     | LVAADKYE                                                                                                  | ..DEE  | ..EATEEERNAFAKNV     |
| SlCHI4  | GSQYGVQ         | ..LESS  | RDR     | LVAADKYE                                                                                                  | ..DEE  | ..EATEEERNAFAKNV     |
| PpCHI1  | GFAPT KH        | ..LSRS  | KQD     | WININLIE                                                                                                  | ..EEE  | ..EATEEERNAFAKNV     |
| PaCHI7  | .....           | ..VRRH  | HATF    | KLDL                                                                                                      | ..MVO  | IFDIE...             |
| AtCHI1  | GKTFWDA         | ..LDEA  | IPR     | IKKSPSSD                                                                                                  | ..TTAL | STARGIFQNR           |
| CrCHI3  | GEQFTEA         | ..INKS  | LPR     | MLAGDTA                                                                                                   | ..SDD  | KRFTYFNSK            |
| SmCHI2  | GAALFSSA        | ..LNDEL | KPR     | KSSPEGE                                                                                                   | ..DEE  | ..EATEEERNAFAKNV     |
| SmCHI8  | GAALFSSA        | ..LNDEL | KPR     | KSSPEGE                                                                                                   | ..DEE  | ..EATEEERNAFAKNV     |
| PpCHI3  | GATFWGA         | ..LDEA  | VPR     | LTAAGAGA                                                                                                  | ..DGD  | ..AAALAEFGNVFKNR     |
| CrCHI18 | GATFWSA         | ..LDEA  | VPR     | LEAANAGA                                                                                                  | ..AGK  | ..EALDAFGVEFKGR      |
| TaCHI3  | GKTFVKA         | ..LDGV  | IAR     | IKORT                                                                                                     | ..DEE  | ..ESSLSAFRNSFLGR     |
| TaCHI2  | GNTFVKA         | ..LDGV  | IAR     | IKORT                                                                                                     | ..DEE  | ..ESSLSAFRNSFLGR     |
| SmCHI1  | GNTFVKA         | ..LDGV  | IAR     | IKORT                                                                                                     | ..DEE  | ..ESSLSAFRNSFLGR     |
| ZmCHI7  | GKTFVNA         | ..LNDV  | IAR     | IKORT                                                                                                     | ..DEE  | ..ESSLSAFRNSFLGR     |
| OsCHI1  | GKTFVKA         | ..LDDI  | IAR     | IKORT                                                                                                     | ..DEE  | ..ESSLSAFRNSFLGR     |
| PaCHI8  | GETFWGA         | ..LDEA  | IPR     | IKKTGAAE                                                                                                  | ..EQS  | ..LSTQKTFLGR         |
| GmCHI5  | GKTFWDA         | ..LSDA  | IPR     | IKQTITTD                                                                                                  | ..ESA  | ..LSTQKTFLGR         |
| GmCHI7  | GKTFWDA         | ..LSDA  | IPR     | IKQTITTD                                                                                                  | ..ESA  | ..LSTQKTFLGR         |
| SlCHI6  | GKTFWDA         | ..LSDA  | IPR     | IKQTITTD                                                                                                  | ..ESA  | ..LSTQKTFLGR         |
| BoCHI3  | GKTFWDA         | ..LDEA  | IPR     | IKKSPSPD                                                                                                  | ..ESA  | ..LSTQKTFLGR         |
| CqCHI4  | GKTFWDA         | ..LDEA  | IPR     | IKKSPSPD                                                                                                  | ..ESA  | ..LSTQKTFLGR         |
| PtCHI4  | GKTFWDA         | ..LDDA  | IPR     | IKKTAIPVD                                                                                                 | ..ESA  | ..LSTQKTFLGR         |
| AtCHI2  | INTVRDV         | ..FEKS  | LGR     | LQKMNPN                                                                                                   | ..DYN  | ..CTTGGSGFTKDV       |
| CrCHI4  | IGLVKST         | ..FETA  | KNR     | LKKMKSN                                                                                                   | ..DYN  | ..CTTGGSGFTKDV       |
| SmCHI6  | VDLVRS          | ..FQVS  | LNR     | LKKMKSN                                                                                                   | ..DYN  | ..CTTGGSGFTKDV       |
| SmCHI4  | VDLVRS          | ..FQVS  | LNR     | LKKMKSN                                                                                                   | ..DYN  | ..CTTGGSGFTKDV       |
| PpCHI6  | MRMVRNA         | ..FHES  | LNR     | LKKMKSN                                                                                                   | ..DYN  | ..CTTGGSGFTKDV       |
| CrCHI16 | AGMVRSA         | ..FDTS  | LNR     | LKKMKSN                                                                                                   | ..DYN  | ..CTTGGSGFTKDV       |
| CrCHI11 | MGWVRKA         | ..FDTS  | LNR     | LKKMKSN                                                                                                   | ..DYN  | ..CTTGGSGFTKDV       |
| ZmCHI5  | IGTVRDA         | ..FEKS  | LGR     | LQKMNPN                                                                                                   | ..DYN  | ..CTTGGSGFTKDV       |
| SmCHI9  | IGTVRDA         | ..FEKS  | LGR     | LQKMNPN                                                                                                   | ..DYN  | ..CTTGGSGFTKDV       |
| OsCHI2  | IGTVRDA         | ..FEKS  | LGR     | LQKMNPN                                                                                                   | ..DYN  | ..CTTGGSGFTKDV       |
| TaCHI12 | ISAVRDA         | ..FEKS  | LGR     | LQKMNPN                                                                                                   | ..DYN  | ..CTTGGSGFTKDV       |
| TaCHI14 | ISAVRDA         | ..FEKS  | LGR     | LQKMNPN                                                                                                   | ..DYN  | ..CTTGGSGFTKDV       |
| TaCHI13 | ISAVRDA         | ..FEKS  | LGR     | LQKMNPN                                                                                                   | ..DYN  | ..CTTGGSGFTKDV       |
| TaCHI15 | IGAVRDA         | ..FEKS  | LGR     | LQKMNPN                                                                                                   | ..DYN  | ..CTTGGSGFTKDV       |
| TaCHI17 | IGAVRDA         | ..FEKS  | LGR     | LQKMNPN                                                                                                   | ..DYN  | ..CTTGGSGFTKDV       |
| TaCHI18 | IGAVRDA         | ..FEKS  | LGR     | LQKMNPN                                                                                                   | ..DYN  | ..CTTGGSGFTKDV       |
| OsCHI4  | IGAVRDA         | ..FEKS  | LGR     | LQKMNPN                                                                                                   | ..DYN  | ..CTTGGSGFTKDV       |
| ZmCHI10 | VGAVRDA         | ..FEKS  | LGR     | LQKMNPN                                                                                                   | ..DYN  | ..CTTGGSGFTKDV       |
| CqCHI1  | VYTVKDA         | ..IEKA  | LAR     | LAKTNPBT                                                                                                  | ..DYN  | ..CTTGGSGFTKDV       |
| BoCHI2  | INTVRDA         | ..FEKS  | LGR     | LQKMNPN                                                                                                   | ..DYN  | ..CTTGGSGFTKDV       |
| GmCHI6  | INSVKDA         | ..FEKS  | LAR     | LAKTNPBT                                                                                                  | ..DYN  | ..CTTGGSGFTKDV       |
| GmCHI8  | INSVKDA         | ..FEKS  | LAR     | LAKTNPBT                                                                                                  | ..DYN  | ..CTTGGSGFTKDV       |
| SlCHI7  | INTVRDA         | ..FEKS  | LGR     | LQKMNPN                                                                                                   | ..DYN  | ..CTTGGSGFTKDV       |
| CsCHI2  | INSVKDA         | ..FEKS  | LAR     | LAKTNPBT                                                                                                  | ..DYN  | ..CTTGGSGFTKDV       |
| PtCHI2  | INTVRDA         | ..FEKS  | LGR     | LQKMNPN                                                                                                   | ..DYN  | ..CTTGGSGFTKDV       |
| PtCHI5  | INTVRDA         | ..FEKS  | LGR     | LQKMNPN                                                                                                   | ..DYN  | ..CTTGGSGFTKDV       |
| AtCHI4  | IRSVRNA         | ..FQES  | GSR     | LKKFGGSD                                                                                                  | ..NDE  | ..LQSTTSIFKDEY       |
| PpCHI5  | GHHIAKG         | ..FDRS  | LPR     | IRKKAQGGG                                                                                                 | ..NDE  | ..LQSTTSIFKDEY       |
| CrCHI5  | GHHIAKG         | ..FDRS  | LPR     | IRKKAQGGG                                                                                                 | ..NDE  | ..LQSTTSIFKDEY       |
| CsCHI5  | LSMAKKG         | ..FTEA  | MES     | MLKLTGQK                                                                                                  | ..NDE  | ..LQSTTSIFKDEY       |
| SlCHI1  | MNMVRKN         | ..FDEG  | LAR     | LAKTNPBT                                                                                                  | ..NDE  | ..LQSTTSIFKDEY       |
| CrCHI3  | VGSVRSA         | ..FEES  | VGR     | LKKFGGSD                                                                                                  | ..NDE  | ..LQSTTSIFKDEY       |
| BoCHI8  | IRSVRSA         | ..FEES  | VGR     | LKKFGGSD                                                                                                  | ..NDE  | ..LQSTTSIFKDEY       |
| BoCHI1  | IRSVRSA         | ..FEES  | VGR     | LKKFGGSD                                                                                                  | ..NDE  | ..LQSTTSIFKDEY       |
| CqCHI6  | IRSVRSA         | ..FEES  | VGR     | LKKFGGSD                                                                                                  | ..NDE  | ..LQSTTSIFKDEY       |
| PtCHI1  | IRSVRSA         | ..FEES  | VGR     | LKKFGGSD                                                                                                  | ..NDE  | ..LQSTTSIFKDEY       |
| ZmCHI2  | IRSVRSA         | ..FEES  | VGR     | LKKFGGSD                                                                                                  | ..NDE  | ..LQSTTSIFKDEY       |
| OsCHI5  | IRSVRSA         | ..FEES  | VGR     | LKKFGGSD                                                                                                  | ..NDE  | ..LQSTTSIFKDEY       |
| TaCHI4  | IGSVRSA         | ..FEES  | VGR     | LKKFGGSD                                                                                                  | ..NDE  | ..LQSTTSIFKDEY       |
| TaCHI5  | IGSVRSA         | ..FEES  | VGR     | LKKFGGSD                                                                                                  | ..NDE  | ..LQSTTSIFKDEY       |
| SlCHI5  | INSVRSA         | ..FEES  | VGR     | LKKFGGSD                                                                                                  | ..NDE  | ..LQSTTSIFKDEY       |
| CsCHI1  | IRSVRNA         | ..FEES  | VGR     | LKKFGGSD                                                                                                  | ..NDE  | ..LQSTTSIFKDEY       |
| GmCHI1  | IRSVRSA         | ..FEES  | VGR     | LKKFGGSD                                                                                                  | ..NDE  | ..LQSTTSIFKDEY       |
| GmCHI9  | IRSVRSA         | ..FEES  | VGR     | LKKFGGSD                                                                                                  | ..NDE  | ..LQSTTSIFKDEY       |
| PpCHI4  | IGSVRSA         | ..FEES  | VGR     | LKKFGGSD                                                                                                  | ..NDE  | ..LQSTTSIFKDEY       |
| PaCHI3  | IGSVRSA         | ..FEES  | VGR     | LKKFGGSD                                                                                                  | ..NDE  | ..LQSTTSIFKDEY       |
| PaCHI6  | IGSVRSA         | ..FEES  | VGR     | LKKFGGSD                                                                                                  | ..NDE  | ..LQSTTSIFKDEY       |
| CrCHI1  | RKKFLDA         | ..LEDR  | APR     | LKKQAGPS                                                                                                  | ..NDE  | ..LQSTTSIFKDEY       |
| CrCHI2  | LPLLGAE         | ..FERI  | LGR     | HEKAGGRA                                                                                                  | ..DDP  | ..ALRELSYSRE         |



type II

type I

type IV

FAP3

FAP2

FAP1

Outgroup

|         |                    |  | 150                |    | 160        |    |        | 170 |    | 180 |    |              |            |           |      |      |        |        |       |    |
|---------|--------------------|--|--------------------|----|------------|----|--------|-----|----|-----|----|--------------|------------|-----------|------|------|--------|--------|-------|----|
| MsCH1   | NFP                |  | P <sup>6</sup> ASV | .. | FYRO       | .. | SPDG   | IG  | .. | LS  | .. | FSPDT        | SIPEK      | ..        | EAAL | ..   | LENKAV | SSAV   | LE    |    |
| GmCH14  | NFP                |  | P <sup>6</sup> STV | .. | FYKO       | .. | SPTG   | TI  | G  | ..  | LS | ..           | FSKDE      | TIPEH     | ..   | EHAV | ..     | IDNKPL | SEAV  | LE |
| GmCH11  | NFP                |  | P <sup>6</sup> STV | .. | FYKO       | .. | SPTG   | TI  | G  | ..  | LS | ..           | FSKDE      | TIPEH     | ..   | EHAV | ..     | IDNKPL | SEAV  | LE |
| SmCH10  | NFA                |  | P <sup>6</sup> SV  | .. | FYRO       | .. | SPDG   | IG  | .. | YG  | .. | FSKDS        | SWSPEK     | ..        | ATAV | ..   | LENKAV | SSAV   | LE    |    |
| SmCH13  | ALK                |  | P <sup>6</sup> MGF | .. | FYVS       | .. | SSSG   | IG  | .. | VG  | .. | FTDDP        | ..         | EPSNLKISS | ..   | ..   | IGNVK  | ANALLS | ..    |    |
| SmCH15  | ALK                |  | P <sup>6</sup> MGF | .. | FYVS       | .. | SSSG   | IG  | .. | VG  | .. | FTDDP        | ..         | EPSNLKISS | ..   | ..   | IGNVK  | ANALLS | ..    |    |
| Cr1CH17 | NFP                |  | P <sup>6</sup> TSV | .. | VVVSF      | .. | TKSALK | ..  | .. | ..  | .. | FTKDN        | EIPKE      | ..        | PAAV | ..   | TEDEAF | ACG    | FLA   |    |
| PaCH15  | FLP                |  | ..                 | .. | CFIHPLHDT  | .. | FTPL   | ..  | .. | ..  | .. | AGMEDCKPM    | ..         | ..        | ..   | ..   | VTSRMT | VEGV   | LA    |    |
| TaCH116 | SFP                |  | T <sup>6</sup> STI | .. | PFTH       | .. | SADG   | ..  | .. | ..  | .. | FSDDT        | KVPEQ      | ..        | ESGR | ..   | VDSRAL | SEAV   | LE    |    |
| PaCH12  | NFP                |  | P <sup>6</sup> STI | .. | LYTI       | .. | SPAG   | ..  | .. | ..  | .. | FSKDS        | SWSPEK     | ..        | ATAV | ..   | LENKAV | SSAV   | LE    |    |
| PaCH11  | NFP                |  | P <sup>6</sup> STI | .. | LLTI       | .. | SPTGLA | ..  | .. | ..  | .. | FSKDS        | SIPEK      | ..        | GRAV | ..   | IKSAVL | LAQ    | GVLA  |    |
| CqCH15  | KFP                |  | P <sup>6</sup> HSI | .. | LFTO       | .. | ..     | ..  | .. | ..  | .. | SLWDH        | QRPIS      | ..        | ..   | ..   | ..     | KTAF   | RVNLK | .. |
| ZmCH11  | TFA                |  | P <sup>6</sup> ASI | .. | LFTH       | .. | SPAG   | ..  | .. | ..  | .. | FSKDS        | SVPAA      | ..        | GGVA | ..   | LENKRL | CEAV   | LE    |    |
| ZmCH16  | TFP                |  | P <sup>6</sup> ASI | .. | HFTH       | .. | SPAG   | ..  | .. | ..  | .. | FSRDS        | SVPVA      | ..        | GGVA | ..   | IDNKLL | CEAV   | LE    |    |
| OsCH13  | SFP                |  | P <sup>6</sup> ASI | .. | LFTH       | .. | SPPG   | ..  | .. | ..  | .. | FSKDS        | SVEGAVAAAA | ..        | ..   | ..   | IDNKAL | CEAV   | LD    |    |
| TaCH111 | SFA                |  | P <sup>6</sup> STI | .. | LFTH       | .. | SPAG   | ..  | .. | ..  | .. | FSKDS        | SVPES      | ..        | GGVA | ..   | IDNKAL | CEAV   | LE    |    |
| TaCH17  | SFA                |  | P <sup>6</sup> ASI | .. | LFTH       | .. | SPAG   | ..  | .. | ..  | .. | FSKDS        | SVPES      | ..        | GGVA | ..   | IDNKAL | CEAV   | LE    |    |
| TaCH19  | SFA                |  | P <sup>6</sup> ASI | .. | LFTH       | .. | SPAG   | ..  | .. | ..  | .. | FSKDS        | SVPES      | ..        | GGVA | ..   | IDNKAL | CEAV   | LE    |    |
| AtCH16  | DFF                |  | P <sup>6</sup> STI | .. | IFAI       | .. | CPKG   | ..  | .. | ..  | .. | FSKEE        | RVPKT      | ..        | ..   | ..   | IKNKLL | CEAV   | LE    |    |
| AtCH17  | DFF                |  | P <sup>6</sup> STI | .. | IFAI       | .. | CPKG   | ..  | .. | ..  | .. | FSKEE        | RVPKT      | ..        | ..   | ..   | IKNKLL | CEAV   | LE    |    |
| GmCH112 | TFF                |  | P <sup>6</sup> STI | .. | LFTH       | .. | SPNG   | ..  | .. | ..  | .. | FSGDE        | TIPEV      | ..        | TSAV | ..   | IKNKLL | CEAV   | LE    |    |
| BoCH17  | KFP                |  | P <sup>6</sup> STI | .. | LFAL       | .. | SPKG   | ..  | .. | ..  | .. | FSDD         | GIPKR      | ..        | GNTA | ..   | IDNKFL | CEAV   | LE    |    |
| BoCH15  | KFP                |  | P <sup>6</sup> STI | .. | LFAL       | .. | SPEG   | ..  | .. | ..  | .. | FSKDD        | SIPVT      | ..        | ..   | ..   | IKNKLL | CEAV   | LE    |    |
| AtCH13  | TFF                |  | P <sup>6</sup> STI | .. | LFAL       | .. | SPTG   | ..  | .. | ..  | .. | FSKDD        | SIPET      | ..        | ..   | ..   | IKNKLL | CEAV   | LE    |    |
| BoCH16  | KFP                |  | P <sup>6</sup> STI | .. | LFAL       | .. | ASKG   | ..  | .. | ..  | .. | FSKDD        | SIPET      | ..        | ..   | ..   | IKNKLL | CEAV   | LE    |    |
| BoCH14  | TFF                |  | P <sup>6</sup> STI | .. | LFAL       | .. | SPNG   | ..  | .. | ..  | .. | FSKDD        | SIPKT      | ..        | ..   | ..   | IKNKLL | CEAV   | LE    |    |
| CqCH12  | ..                 |  | ..                 | .. | ..         | .. | ..     | ..  | .. | ..  | .. | ..           | ..         | ..        | ..   | ..   | ..     | ..     | ..    | .. |
| CqCH13  | ..                 |  | ..                 | .. | ..         | .. | ..     | ..  | .. | ..  | .. | ..           | ..         | ..        | ..   | ..   | ..     | ..     | ..    | .. |
| SlCH12  | TFS                |  | P <sup>6</sup> STI | .. | LFTO       | .. | SVVG   | ..  | .. | ..  | .. | FSDDD        | SVPGT      | ..        | GNVV | ..   | IDNKPL | SEAV   | LE    |    |
| SlCH13  | TFF                |  | P <sup>6</sup> STI | .. | LFTO       | .. | SPLG   | ..  | .. | ..  | .. | FSDDD        | SVPV       | ..        | GNV  | ..   | IDNKQL | SEAV   | LD    |    |
| CsCH14  | NFL                |  | P <sup>6</sup> STI | .. | LFTO       | .. | SPNG   | ..  | .. | ..  | .. | FSKDE        | SIPET      | ..        | ..   | ..   | IESKLL | SEAV   | LE    |    |
| PtCH13  | TFF                |  | P <sup>6</sup> STI | .. | LFTH       | .. | SPHG   | ..  | .. | ..  | .. | ..           | ..         | ..        | ..   | ..   | ..     | ..     | ..    | .. |
| AtCH15  | YFK                |  | P <sup>6</sup> STI | .. | TYHFS      | .. | AKDG   | ..  | .. | ..  | .. | ..           | ..         | ..        | ..   | ..   | ..     | ..     | ..    | .. |
| ZmCH14  | HLA                |  | P <sup>6</sup> STI | .. | NWKH       | .. | PLG    | ..  | .. | ..  | .. | ..           | ..         | ..        | ..   | ..   | ..     | ..     | ..    | .. |
| ZmCH19  | LPRYTSHISA         |  | H <sup>6</sup> SL  | .. | IRSLERLMRW | .. | LTTR   | ..  | .. | ..  | .. | FLPSRSVSHHP  | ..         | ..        | ..   | ..   | ..     | ..     | ..    | .. |
| SmCH17  | KLE                |  | P <sup>6</sup> STI | .. | VYSW       | .. | PSSSSH | ..  | .. | ..  | .. | ARSQKFLSGKIP | ..         | ..        | ..   | ..   | ..     | ..     | ..    | .. |
| SmCH11  | KLE                |  | P <sup>6</sup> STI | .. | VYSW       | .. | PSSSSH | ..  | .. | ..  | .. | ..           | ..         | ..        | ..   | ..   | ..     | ..     | ..    | .. |
| Cr1CH12 | WLA                |  | Q <sup>6</sup> CTI | .. | YLHWP      | .. | SPTCLO | ..  | .. | ..  | .. | ..           | ..         | ..        | ..   | ..   | ..     | ..     | ..    | .. |
| PpCH12  | NLP                |  | P <sup>6</sup> STI | .. | TYHW       | .. | ATPD   | ..  | .. | ..  | .. | ..           | ..         | ..        | ..   | ..   | ..     | ..     | ..    | .. |
| PpCH17  | NLP                |  | P <sup>6</sup> STI | .. | TYHW       | .. | ATPD   | ..  | .. | ..  | .. | ..           | ..         | ..        | ..   | ..   | ..     | ..     | ..    | .. |
| PaCH14  | YLK                |  | P <sup>6</sup> STI | .. | TYNP       | .. | SASTKT | ..  | .. | ..  | .. | ..           | ..         | ..        | ..   | ..   | ..     | ..     | ..    | .. |
| CqCH17  | YLK                |  | P <sup>6</sup> STI | .. | TFSP       | .. | FASG   | ..  | .. | ..  | .. | ..           | ..         | ..        | ..   | ..   | ..     | ..     | ..    | .. |
| TaCH16  | YFR                |  | P <sup>6</sup> STI | .. | TFHFP      | .. | ATPTAA | ..  | .. | ..  | .. | ..           | ..         | ..        | ..   | ..   | ..     | ..     | ..    | .. |
| TaCH110 | YFR                |  | P <sup>6</sup> STI | .. | TFHFP      | .. | ATPTAA | ..  | .. | ..  | .. | ..           | ..         | ..        | ..   | ..   | ..     | ..     | ..    | .. |
| TaCH18  | YFR                |  | P <sup>6</sup> STI | .. | TFHFP      | .. | ATPTAA | ..  | .. | ..  | .. | ..           | ..         | ..        | ..   | ..   | ..     | ..     | ..    | .. |
| OsCH13  | YFK                |  | P <sup>6</sup> STI | .. | TFHFP      | .. | ATPTAA | ..  | .. | ..  | .. | ..           | ..         | ..        | ..   | ..   | ..     | ..     | ..    | .. |
| OsCH17  | YFK                |  | P <sup>6</sup> STI | .. | TFHFP      | .. | ATPTAA | ..  | .. | ..  | .. | ..           | ..         | ..        | ..   | ..   | ..     | ..     | ..    | .. |
| BoCH19  | YFK                |  | P <sup>6</sup> STI | .. | TYRFS      | .. | AKDG   | ..  | .. | ..  | .. | ..           | ..         | ..        | ..   | ..   | ..     | ..     | ..    | .. |
| GmCH12  | YFK                |  | P <sup>6</sup> STI | .. | TYHFS      | .. | PTNSAT | ..  | .. | ..  | .. | ..           | ..         | ..        | ..   | ..   | ..     | ..     | ..    | .. |
| GmCH13  | YFK                |  | P <sup>6</sup> STI | .. | TYHFS      | .. | PTNSAT | ..  | .. | ..  | .. | ..           | ..         | ..        | ..   | ..   | ..     | ..     | ..    | .. |
| CsCH13  | YFK                |  | P <sup>6</sup> STI | .. | TYHFS      | .. | PTNSAT | ..  | .. | ..  | .. | ..           | ..         | ..        | ..   | ..   | ..     | ..     | ..    | .. |
| PtCH16  | YMK                |  | P <sup>6</sup> STI | .. | TYHFS      | .. | PTNSAT | ..  | .. | ..  | .. | ..           | ..         | ..        | ..   | ..   | ..     | ..     | ..    | .. |
| SlCH14  | YFK                |  | P <sup>6</sup> STI | .. | TYHFS      | .. | PTNSAT | ..  | .. | ..  | .. | ..           | ..         | ..        | ..   | ..   | ..     | ..     | ..    | .. |
| PpCH11  | CF                 |  | ..                 | .. | ..         | .. | ..     | ..  | .. | ..  | .. | ..           | ..         | ..        | ..   | ..   | ..     | ..     | ..    | .. |
| PaCH17  | ..                 |  | ..                 | .. | ..         | .. | ..     | ..  | .. | ..  | .. | ..           | ..         | ..        | ..   | ..   | ..     | ..     | ..    | .. |
| AtCH11  | NLN                |  | P <sup>6</sup> STI | .. | LLTW       | .. | INTS   | ..  | .. | ..  | .. | ..           | ..         | ..        | ..   | ..   | ..     | ..     | ..    | .. |
| TaCH12  | KLK                |  | P <sup>6</sup> STI | .. | YFTW       | .. | IQPD   | ..  | .. | ..  | .. | ..           | ..         | ..        | ..   | ..   | ..     | ..     | ..    | .. |
| SmCH12  | KLK                |  | P <sup>6</sup> STI | .. | YFTW       | .. | IQPD   | ..  | .. | ..  | .. | ..           | ..         | ..        | ..   | ..   | ..     | ..     | ..    | .. |
| SmCH18  | KLK                |  | P <sup>6</sup> STI | .. | YFTW       | .. | IQPD   | ..  | .. | ..  | .. | ..           | ..         | ..        | ..   | ..   | ..     | ..     | ..    | .. |
| PpCH13  | SLQ                |  | P <sup>6</sup> STI | .. | TLTW       | .. | VQPS   | ..  | .. | ..  | .. | ..           | ..         | ..        | ..   | ..   | ..     | ..     | ..    | .. |
| Cr1CH18 | SLK                |  | P <sup>6</sup> STI | .. | YLNW       | .. | VQPP   | ..  | .. | ..  | .. | ..           | ..         | ..        | ..   | ..   | ..     | ..     | ..    | .. |
| TaCH13  | NLK                |  | P <sup>6</sup> STI | .. | YLTW       | .. | LEPS   | ..  | .. | ..  | .. | ..           | ..         | ..        | ..   | ..   | ..     | ..     | ..    | .. |
| NtCH12  | NLK                |  | P <sup>6</sup> STI | .. | YLTW       | .. | LEPS   | ..  | .. | ..  | .. | ..           | ..         | ..        | ..   | ..   | ..     | ..     | ..    | .. |
| TaCH11  | NLQ                |  | P <sup>6</sup> STI | .. | YLTW       | .. | LEPS   | ..  | .. | ..  | .. | ..           | ..         | ..        | ..   | ..   | ..     | ..     | ..    | .. |
| ZmCH17  | NLK                |  | P <sup>6</sup> STI | .. | YLTW       | .. | LEPS   | ..  | .. | ..  | .. | ..           | ..         | ..        | ..   | ..   | ..     | ..     | ..    | .. |
| OsCH11  | SLK                |  | P <sup>6</sup> STI | .. | YLTW       | .. | LEPS   | ..  | .. | ..  | .. | ..           | ..         | ..        | ..   | ..   | ..     | ..     | ..    | .. |
| PaCH18  | SLK                |  | P <sup>6</sup> STI | .. | YLNW       | .. | LEPS   | ..  | .. | ..  | .. | ..           | ..         | ..        | ..   | ..   | ..     | ..     | ..    | .. |
| GmCH15  | P <sup>6</sup> STI |  | P <sup>6</sup> STI | .. | YLTW       | .. | LEPS   | ..  | .. | ..  | .. | ..           | ..         | ..        | ..   | ..   | ..     | ..     | ..    | .. |
| GmCH17  | P <sup>6</sup> STI |  | P <sup>6</sup> STI | .. | YLTW       | .. | LEPS   | ..  | .. | ..  | .. | ..           | ..         | ..        | ..   | ..   | ..     | ..     | ..    | .. |
| SlCH16  | P <sup>6</sup> STI |  | P <sup>6</sup> STI | .. | YLTW       | .. | LEPS   | ..  | .. | ..  | .. | ..           | ..         | ..        | ..   | ..   | ..     | ..     | ..    | .. |
| SlCH13  | P <sup>6</sup> STI |  | P <sup>6</sup> STI | .. | YLTW       | .. | LEPS   | ..  | .. | ..  | .. | ..           | ..         | ..        | ..   | ..   | ..     | ..     | ..    | .. |
| PaCH14  | P <sup>6</sup> STI |  | P <sup>6</sup> STI | .. | YLTW       | .. | LEPS   | ..  | .. | ..  | .. | ..           | ..         | ..        | ..   | ..   | ..     | ..     | ..    | .. |
| CqCH14  | SLK                |  | P <sup>6</sup> STI | .. | YLTW       | .. | LEPS   | ..  | .. | ..  | .. | ..           | ..         | ..        | ..   | ..   | ..     | ..     | ..    | .. |
| PtCH14  | SLK                |  | P <sup>6</sup> STI | .. | YLTW       | .. | LEPS   | ..  | .. | ..  | .. | ..           | ..         | ..        | ..   | ..   | ..     | ..     | ..    | .. |
| AtCH12  | P <sup>6</sup> STI |  | P <sup>6</sup> STI | .. | YLTW       | .. | LEPS   | ..  | .. | ..  | .. | ..           | ..         | ..        | ..   | ..   | ..     | ..     | ..    | .. |
| Cr1CH14 | ..                 |  | ..                 | .. | ..         | .. | ..     | ..  | .. | ..  | .. | ..           | ..         | ..        | ..   | ..   | ..     | ..     | ..    | .. |
| SmCH16  | KIH                |  | P <sup>6</sup> STI | .. | DIHW       | .. | OPGG   | ..  | .. | ..  | .. | ..           | ..         | ..        | ..   | ..   | ..     | ..     | ..    | .. |
| SmCH14  | KIH                |  | P <sup>6</sup> STI | .. | DIHW       | .. | OPGG   | ..  | .. | ..  | .. | ..           | ..         | ..        | ..   | ..   | ..     | ..     | ..    | .. |
| PpCH16  | R <sup>6</sup> STI |  | P <sup>6</sup> STI | .. | DVRW       | .. | OVGG   | ..  | .. | ..  | .. | ..           | ..         | ..        | ..   | ..   | ..     | ..     | ..    | .. |
| Cr1CH16 | P <sup>6</sup> STI |  | P <sup>6</sup> STI | .. | DFQW       | .. | MOGG   | ..  | .. | ..  | .. | ..           | ..         | ..        | ..   | ..   | ..     | ..     | ..    | .. |
| Cr1CH11 | R <sup>6</sup> STI |  | P <sup>6</sup> STI | .. | DFQW       | .. | MOGG   | ..  | .. | ..  | .. | ..           | ..         | ..        | ..   | ..   | ..     | ..     | ..    | .. |
| ZmCH15  | R <sup>6</sup> STI |  | P <sup>6</sup> STI | .. | DFQW       | .. | MOGG   | ..  | .. | ..  | .. | ..           | ..         | ..        | ..   | ..   | ..     | ..     | ..    | .. |
| ZmCH18  | R <sup>6</sup> STI |  | P <sup>6</sup> STI | .. | DFQW       | .. | MOGG   | ..  | .. | ..  | .. | ..           | ..         | ..        | ..   | ..   | ..     | ..     | ..    | .. |
| OsCH12  | C <sup>6</sup> STI |  | P <sup>6</sup> STI | .. | DFQW       | .. | MOGG   | ..  | .. | ..  | .. | ..           | ..         | ..        | ..   | ..   | ..     | ..     | ..    | .. |
| TaCH112 | R <sup>6</sup> STI |  | P <sup>6</sup> STI | .. |            |    |        |     |    |     |    |              |            |           |      |      |        |        |       |    |

220

```

LLN..EGAFKIGN.....
FFLELANPNNN.....
FLELANPNNIEN.....
VLHGIIIV.....
LL.....
LL.....
LK.....
LCSNRRLMYEIIWLKLKNVKKLIGLSLTKSNSQ.
LINHH.....
LVKEY.....
VVATDT.....

```

LLAKETAAPADAPQAEPPVSITA.  
 LLTKGTAAAAALAREPPVSVA.  
 LLKAESTGDDVAAAAPAPVSA.  
 LLEGAALAGGEPAAEAAVSVV.  
 LLKGAAGGEPFAVEPPVSVSV.  
 LLKGASHAGEPAAEPPVSVSV.  
 LLNKKDIPYAAVNTPSSTRVRVTSQTRCAINLLSSCKADDWSDKCSQSKSVQR  
 LLNKKDPPYNEANNVYVATKN.  
 LLKEPQGCDQPSHK.  
 LLKNNEVKEDATKAKTQDEEANDLSLGDKLAENKKTDLPGDPSFWFVRLALCFYA.  
 LLNNSDKVEEDATKT.  
 LLMKNKDEKEYSVDSHVEEKLAN.  
 LLNNSDKVEEDATKTQDEEANNPLGDKKAKK.  
 LLMKENKVEKDATKTQDEEANDVSLGDKKLAKEN.  
 LLNPNENAEANSTNGVESEKSAKVVDTEKLSGQEDIKS.  
 LLMKXSNAAEST.  
 LLVCERKSGDVSQV.  
 LLKENNGSTNDHKAAGEIDGDINLKATKAYKDKDVISIPIENGNGKHKHVTNE

```

VLT.....
LAE.....
FF.....
  _EC.....
  _EC.....
OL.....
OVA.....
LLKQ.....
ELSK.....
MLSSP.....
MLSSP.....
MLTSP.....
LLAVAA.....
LLSA.....
LLSA.....
VLT.....
ELSK.....
ELSK.....
ELSK.....
ELAR.....
ELSK.....
NIOPPKFDNIFYRILFLV.....

```

```

      .C
      LV.....
      LLDENVKRSTRA.....
      LP.....
      SL.....
      TL.....
      ILTK.....
      LLTK.....
      LLLAK.....
      ILTK.....
      LI.....
      VLK.....
      VIK.....
      VK.....
      VLK.....
      L.....
      ILK.....
      IIRKC.....

```

```

ILHGSG...
ILNN...
ILNN...
ILKRR...
ILKS...
ILQTS...
LMRRC...
LIRRC...
LIRRCY...
LIRRC...
LIRRC...
LIRRC...
LMGRCGG...
LMGRCGG...
LMGRCGG...
LIGRC...
LIGRR...
LMRRC...
ILKSC...
ILNRK...
ILRRC...
ILRGC...
ILRRC...
LIGKC...

```

```

L1GRU.....
LAFDN.....
LFHGGASET...
LFHKP.....
LF.....
LF.....
FLSKE.....
IAVDDKAAHEIQK..
IADVDK.....
VLKEN.....
LLQS.....
LLKS.....
ILLKN.....
ILKA.....
ILKA.....
LLHK.....
LLQE.....
LL.....
LLC.....
LLSQ.....
LLTO.....
ALKE.....

```

. **LA**EGGDSPYRLQFGERLLCAPGASPTSQPNACVLASS.....



type II

type I

type IV

FAP3

FAP2

FAP1

Outgroup

|         |                                                                                                                                    |
|---------|------------------------------------------------------------------------------------------------------------------------------------|
| MsCHI   |                                                                                                                                    |
| GmCHI4  |                                                                                                                                    |
| GmCHI11 |                                                                                                                                    |
| GmCHI10 |                                                                                                                                    |
| SmCHI3  |                                                                                                                                    |
| SmCHI5  |                                                                                                                                    |
| CriCHI7 |                                                                                                                                    |
| PaCHI5  |                                                                                                                                    |
| TaCHI16 |                                                                                                                                    |
| PaCHI2  |                                                                                                                                    |
| PaCHI1  |                                                                                                                                    |
| CqCHI5  |                                                                                                                                    |
| ZmCHI1  |                                                                                                                                    |
| ZmCHI6  |                                                                                                                                    |
| OsCHI3  |                                                                                                                                    |
| TaCHI11 |                                                                                                                                    |
| TaCHI7  |                                                                                                                                    |
| TaCHI9  |                                                                                                                                    |
| AtCHI6  | NGAKDRSALFDITNDSPiVGLAMQTPSSGGVVGKRNMsrINNTPGSGEALLRGQVKTL LQKV EEEADLTkISLESrPFiHLVTSPMGLLAPTPANTPQVLGFSDEVQVVITSPVVAGQFRAPSQVVES |
| AtCHI7  |                                                                                                                                    |
| GmCHI12 |                                                                                                                                    |
| BoCHI7  |                                                                                                                                    |
| BoCHI5  |                                                                                                                                    |
| AtCHI3  |                                                                                                                                    |
| BoCHI6  |                                                                                                                                    |
| BoCHI4  |                                                                                                                                    |
| CqCHI2  |                                                                                                                                    |
| CqCHI3  |                                                                                                                                    |
| SlCHI2  |                                                                                                                                    |
| SlCHI3  |                                                                                                                                    |
| CsCHI4  |                                                                                                                                    |
| PtCHI3  |                                                                                                                                    |
| AtCHI5  |                                                                                                                                    |
| ZmCHI4  |                                                                                                                                    |
| ZmCHI9  |                                                                                                                                    |
| SmCHI7  |                                                                                                                                    |
| SmCHI1  |                                                                                                                                    |
| CriCHI2 |                                                                                                                                    |
| PpCHI2  |                                                                                                                                    |
| PpCHI7  |                                                                                                                                    |
| PaCHI4  |                                                                                                                                    |
| CqCHI7  |                                                                                                                                    |
| TaCHI6  |                                                                                                                                    |
| TaCHI10 |                                                                                                                                    |
| TaCHI8  |                                                                                                                                    |
| TaCHI3  |                                                                                                                                    |
| OsCHI6  |                                                                                                                                    |
| OsCHI7  |                                                                                                                                    |
| BoCHI9  |                                                                                                                                    |
| GmCHI2  |                                                                                                                                    |
| GmCHI3  |                                                                                                                                    |
| CsCHI3  |                                                                                                                                    |
| PtCHI6  |                                                                                                                                    |
| SlCHI4  |                                                                                                                                    |
| PpCHI1  |                                                                                                                                    |
| PaCHI7  |                                                                                                                                    |
| AtCHI1  |                                                                                                                                    |
| CrCHI3  |                                                                                                                                    |
| SmCHI2  |                                                                                                                                    |
| SmCHI8  |                                                                                                                                    |
| PpCHI3  |                                                                                                                                    |
| CriCHI8 |                                                                                                                                    |
| TaCHI3  |                                                                                                                                    |
| TaCHI2  |                                                                                                                                    |
| TaCHI1  |                                                                                                                                    |
| ZmCHI7  |                                                                                                                                    |
| OsCHI1  |                                                                                                                                    |
| PaCHI8  |                                                                                                                                    |
| GmCHI5  |                                                                                                                                    |
| GmCHI7  |                                                                                                                                    |
| SlCHI6  |                                                                                                                                    |
| BoCHI3  |                                                                                                                                    |
| CqCHI4  |                                                                                                                                    |
| PtCHI4  |                                                                                                                                    |
| AtCHI2  |                                                                                                                                    |
| CriCHI4 |                                                                                                                                    |
| SmCHI6  |                                                                                                                                    |
| SmCHI4  |                                                                                                                                    |
| PpCHI6  |                                                                                                                                    |
| CriCHI6 |                                                                                                                                    |
| CriCHI1 |                                                                                                                                    |
| ZmCHI5  |                                                                                                                                    |
| ZmCHI8  |                                                                                                                                    |
| OsCHI2  |                                                                                                                                    |
| TaCHI12 |                                                                                                                                    |
| TaCHI14 |                                                                                                                                    |
| TaCHI13 |                                                                                                                                    |
| TaCHI15 |                                                                                                                                    |
| TaCHI17 |                                                                                                                                    |
| TaCHI18 |                                                                                                                                    |
| OsCHI4  |                                                                                                                                    |
| ZmCHI10 |                                                                                                                                    |
| CqCHI1  |                                                                                                                                    |
| BoCHI2  |                                                                                                                                    |
| GmCHI6  |                                                                                                                                    |
| GmCHI8  |                                                                                                                                    |
| SlCHI7  |                                                                                                                                    |
| CsCHI2  |                                                                                                                                    |
| PtCHI2  |                                                                                                                                    |
| PtCHI5  |                                                                                                                                    |
| AtCHI4  |                                                                                                                                    |
| PpCHI5  |                                                                                                                                    |
| CriCHI5 |                                                                                                                                    |
| CsCHI5  |                                                                                                                                    |
| SlCHI1  |                                                                                                                                    |
| CriCHI3 |                                                                                                                                    |
| BoCHI8  |                                                                                                                                    |
| BoCHI1  |                                                                                                                                    |
| CqCHI6  |                                                                                                                                    |
| PtCHI1  |                                                                                                                                    |
| ZmCHI2  |                                                                                                                                    |
| OsCHI5  |                                                                                                                                    |
| TaCHI4  |                                                                                                                                    |
| TaCHI5  |                                                                                                                                    |
| SlCHI5  |                                                                                                                                    |
| CsCHI1  |                                                                                                                                    |
| GmCHI1  |                                                                                                                                    |
| GmCHI9  |                                                                                                                                    |
| PpCHI4  |                                                                                                                                    |
| PaCHI3  |                                                                                                                                    |
| PaCHI6  |                                                                                                                                    |
| CrCHI1  |                                                                                                                                    |
| CrCHI2  |                                                                                                                                    |

|          |         |                                                                                              |
|----------|---------|----------------------------------------------------------------------------------------------|
| type II  | MsCHI   |                                                                                              |
|          | GmCHI4  |                                                                                              |
|          | GmCHI11 |                                                                                              |
|          | GmCHI10 |                                                                                              |
|          | SmCHI3  |                                                                                              |
|          | SmCHI5  |                                                                                              |
|          | CrCHI7  |                                                                                              |
|          | PaCHI5  |                                                                                              |
|          | TaCHI16 |                                                                                              |
|          | PaCHI2  |                                                                                              |
| type I   | PaCHI1  |                                                                                              |
|          | CqCHI5  |                                                                                              |
|          | ZmCHI1  |                                                                                              |
|          | ZmCHI6  |                                                                                              |
|          | OsCHI3  |                                                                                              |
|          | TaCHI11 |                                                                                              |
|          | TaCHI7  |                                                                                              |
|          | TaCHI9  |                                                                                              |
|          | AtCHI6  | NMFDKEESLELEKSPSITRSLLLDFSDKSELWESSDCSSVVTQNPEDDNSSVWSMQANASAKDEEYDDEEEEAYSYGEEYDEEYDDEEEEEE |
|          | AtCHI7  | GGIVDGLCEGIRKMSVETDFAGKHTRFVYDSED                                                            |
|          | GmCHI12 |                                                                                              |
|          | BoCHI7  |                                                                                              |
|          | BoCHI5  |                                                                                              |
|          | AtCHI3  |                                                                                              |
|          | BoCHI6  |                                                                                              |
|          | BoCHI4  |                                                                                              |
|          | CqCHI2  |                                                                                              |
|          | CqCHI3  |                                                                                              |
|          | SlCHI2  |                                                                                              |
|          | SlCHI3  |                                                                                              |
|          | CsCHI4  |                                                                                              |
|          | PtCHI3  |                                                                                              |
|          | AtCHI5  |                                                                                              |
|          | ZmCHI4  |                                                                                              |
|          | ZmCHI9  |                                                                                              |
|          | SmCHI7  |                                                                                              |
|          | SmCHI1  |                                                                                              |
|          | CriCHI2 |                                                                                              |
|          | PpCHI2  |                                                                                              |
|          | PpCHI7  |                                                                                              |
| type IV  | PaCHI4  |                                                                                              |
|          | CqCHI7  |                                                                                              |
|          | TaCHI6  |                                                                                              |
|          | TaCHI10 |                                                                                              |
|          | TaCHI8  |                                                                                              |
|          | ZmCHI3  |                                                                                              |
|          | OsCHI6  |                                                                                              |
|          | OsCHI7  |                                                                                              |
|          | BoCHI9  |                                                                                              |
|          | GmCHI2  |                                                                                              |
|          | GmCHI3  |                                                                                              |
|          | CsCHI3  |                                                                                              |
|          | PtCHI6  |                                                                                              |
|          | SlCHI4  |                                                                                              |
|          | PpCHI1  |                                                                                              |
|          | PaCHI7  |                                                                                              |
|          | AtCHI1  |                                                                                              |
|          | CrCHI3  |                                                                                              |
|          | SmCHI2  |                                                                                              |
|          | SmCHI8  |                                                                                              |
| FAP3     | PpCHI3  |                                                                                              |
|          | CriCHI8 |                                                                                              |
|          | TaCHI3  |                                                                                              |
|          | TaCHI2  |                                                                                              |
|          | TaCHI1  |                                                                                              |
|          | ZmCHI7  |                                                                                              |
|          | PaCHI1  |                                                                                              |
|          | PaCHI8  |                                                                                              |
|          | GmCHI5  |                                                                                              |
|          | GmCHI7  |                                                                                              |
|          | SlCHI6  |                                                                                              |
|          | BoCHI3  |                                                                                              |
|          | CqCHI4  |                                                                                              |
|          | PtCHI4  |                                                                                              |
|          | AtCHI2  |                                                                                              |
|          | CriCHI4 |                                                                                              |
|          | SmCHI6  |                                                                                              |
|          | SmCHI4  |                                                                                              |
|          | PpCHI6  |                                                                                              |
|          | CriCHI6 |                                                                                              |
| FAP2     | CriCHI1 |                                                                                              |
|          | ZmCHI5  |                                                                                              |
|          | ZmCHI8  |                                                                                              |
|          | OsCHI2  |                                                                                              |
|          | TaCHI12 |                                                                                              |
|          | TaCHI14 |                                                                                              |
|          | TaCHI13 |                                                                                              |
|          | TaCHI15 |                                                                                              |
|          | TaCHI17 |                                                                                              |
|          | TaCHI18 |                                                                                              |
|          | OsCHI4  |                                                                                              |
|          | ZmCHI10 |                                                                                              |
|          | CqCHI1  |                                                                                              |
|          | BoCHI2  |                                                                                              |
|          | GmCHI6  |                                                                                              |
|          | GmCHI8  |                                                                                              |
|          | SlCHI7  |                                                                                              |
|          | CsCHI2  |                                                                                              |
|          | PtCHI2  |                                                                                              |
|          | PtCHI5  |                                                                                              |
| FAP1     | AtCHI4  |                                                                                              |
|          | PpCHI5  |                                                                                              |
|          | CriCHI5 |                                                                                              |
|          | CsCHI5  |                                                                                              |
|          | SlCHI1  |                                                                                              |
|          | CriCHI3 |                                                                                              |
|          | BoCHI8  |                                                                                              |
|          | BoCHI1  |                                                                                              |
|          | CqCHI6  |                                                                                              |
|          | PtCHI1  |                                                                                              |
|          | ZmCHI2  |                                                                                              |
|          | OsCHI5  |                                                                                              |
|          | TaCHI4  |                                                                                              |
|          | TaCHI5  |                                                                                              |
|          | SlCHI5  |                                                                                              |
|          | CsCHI1  |                                                                                              |
|          | GmCHI1  |                                                                                              |
|          | GmCHI9  |                                                                                              |
|          | PpCHI4  |                                                                                              |
|          | PaCHI3  |                                                                                              |
| Outgroup | PaCHI6  |                                                                                              |
|          | CrCHI1  |                                                                                              |
|          | CrCHI2  |                                                                                              |

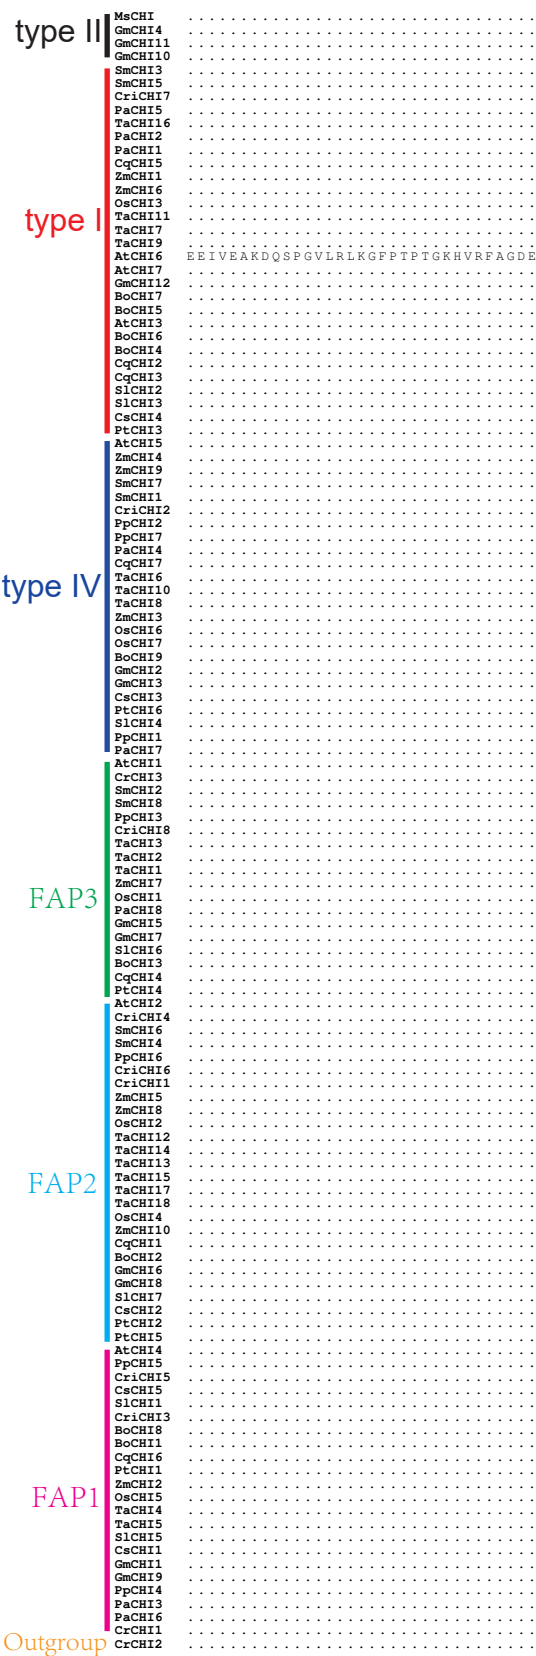

**Supplementary Figure S3.** Protein sequence alignment of CHIs among 15 green plants. The first line indicated the model protein sequence of MsCHI. The critical catalytic residues essential for *bona fide* CHI active sites are shown with red asterisks. Residues for the hydrogen bond network are marked with green asterisks. The blue boxes indicated the residues responsible for substrate preference.
