# Supplementary material for: Genome-Wide Classification and Evolutionary Analysis Reveal Diverged Patterns of Chalcone Isomerase in Plants
Source: Biomolecules. 2022 Jul 8;12(7):961. doi: 10.3390/biom12070961 (PMC9313115; doi:10.3390/biom12070961)
Supplement: Supplementary file 1 [file biomolecules-12-00961-s001.zip]

Archive with 15 entries (15 files):
- Figure S1 A Phylogenetic tree of green plant CHI genes was constructed using Bayesian method.pdf
- Figure S2 20 putative conserved motifs were identified using MEME suite in this study.pdf
- Figure S3 Protein sequence alignment of CHIs among 15 green plants.pdf
- Figure S4 3D homology model of 122 CHIs among 15 green plants.pdf
- Figure S5. The chromosomal location and duplication events of CHI genes in 14 green plants.pdf
- Figure S6 Cis-acting elements of all CHI genes were shown based on the phylogenetic tree.pdf
- Figure S7. Pearsoní»s correlation coefficient among CHI genes at the transcriptional level among 8 green plants..pdf
- Supplementary Figure caption.pdf
- Table S1 15 representative green plants,  genome datasets sources and their version information used in the present study.xlsx
- Table S2 Primers used in real-time PCR.xlsx
- Table S3 Characteristics of the 122 putative CHI genes in green plants.xlsx
- Table S4 Eight OGs were list in the 15 green plants.xlsx
- Table S5 The detail information on 3D homology mode of 122 CHIs.xlsx
- Table S6 KaKs analysis for the duplicated CHI orthologs in green plants.xlsx
- Table S7 The detail information and statistical categories on cis-acting elements from 122 CHI genes in 15 green plants.xlsx
