# Supplementary material for: Genome-Wide Classification and Evolutionary Analysis Reveal Diverged Patterns of Chalcone Isomerase in Plants
Source: Biomolecules. 2022 Jul 8;12(7):961. doi: 10.3390/biom12070961 (PMC9313115; doi:10.3390/biom12070961)
Supplement: Supplementary file 1 [file biomolecules-12-00961-s001.zip › Table S1 15 representative green plants, genome datasets sources and their version information used in the present study.xlsx]

## Sheet: Genome
Table S1. 15 representative green plants, genome datasets sources and their version imformation used in the present study
Species name	Link of data source	Version
Oryza sativa	http://plants.ensembl.org/index.html	IRGSP-1.0
Zea mays	http://plants.ensembl.org/index.html	B73_RefGen_v4
Triticum aestivum	http://plants.ensembl.org/index.html	IWGSC
Arabidopsis thaliana	http://plants.ensembl.org/index.html	TAIR10
Brassica oleracea	http://plants.ensembl.org/index.html	BOL
Chenopodium quinoa	http://plants.ensembl.org/index.html	ASM168347v1
Chlamydomonas reinhardtii	http://plants.ensembl.org/index.html	v5.5
Cannabis sativa	http://plants.ensembl.org/index.html	cs10
Glycine max	http://plants.ensembl.org/index.html	v2.1
Physcomitrella patens	http://plants.ensembl.org/index.html	v3.0
Populus trichocarpa	http://plants.ensembl.org/index.html	v3.0
Solanum lycopersicum	http://plants.ensembl.org/index.html	SL3.0
Selaginella moellendorffii	http://plants.ensembl.org/index.html	v1.0
Ceratopteris richardii	https://phytozome-next.jgi.doe.gov/	v2.1
Picea abies	https://plantgenie.org/	v1.0
