# Supplementary material for: Genome-Wide Classification and Evolutionary Analysis Reveal Diverged Patterns of Chalcone Isomerase in Plants
Source: Biomolecules. 2022 Jul 8;12(7):961. doi: 10.3390/biom12070961 (PMC9313115; doi:10.3390/biom12070961)
Supplement: Supplementary file 1 [file biomolecules-12-00961-s001.zip › Table S2 Primers used in real-time PCR.xlsx]

## Sheet: Sheet1
Table S2. Primers used in real-time PCR.
Gene name	Forward primer (5'->3')	Reverse primer (5'->3')
Actin1	GGAAGTACAGTGTCTGGATTGGAG	TCTTGGCTTAGCATTCTTGGGT
UBC	GTGCAGCGAGAAAAGTCAGC	GAACTTGCGGAGGAAGGAGAG
EF-1α	GCTGCTGCAACAAGATGGATG	CAGAGATGGGAACGAAGGGAA
OsCHI1	CGATGGCTTCTTGGGTAG	TTTCGGTTTCTGTCACTTTG
OsCHI2	GAGTAAATACGGAAACGAAGC	GCAGCACGAAAGGGAGC
OsCHI3	TCGGACAAGGTGACGGAGAACTG	TGGAGAACGCGACGGTGAGGAC
OsCHI4	CCATGATTTGGGATACCTAC	ATCTGCCTGTGCTGTCG
OsCHI5	AAGAGCGTGGGAAGCAGG	GTGAAACGAAACTCTGAAGCAAC
OsCHI6	AGGAGGATGAAGAAGAGGC	GGAAGGTGATGACGGAGTT
OsCHI7	GTTTCGGCTCCATTGCT	TGATAACGGCTTACTGACG
