# Supplementary material for: Genome-Wide Classification and Evolutionary Analysis Reveal Diverged Patterns of Chalcone Isomerase in Plants
Source: Biomolecules. 2022 Jul 8;12(7):961. doi: 10.3390/biom12070961 (PMC9313115; doi:10.3390/biom12070961)
Supplement: Supplementary file 1 [file biomolecules-12-00961-s001.zip › Table S3 Characteristics of the 122 putative CHI genes in green plants.xlsx]

## Sheet: Sheet1
Table S3. Characteristics of the 122 putative CHI genes in green plants.
Species	GeneID	GeneName	Chr	Strat	End	Protein(aa)	MW(Da)	Theoretical pI	PredictedLocation	Type	Orthogroup	ExonNumber
Oryza sativa	Os02g0320300	OsCHI1	2	12765282	12772010	280	29656.8	9.06	Chloroplast	III	OG4	5
	Os02g0778500	OsCHI2	2	32957456	32961345	427	47783.2	7.52	Cytoplasm	III	OG2	10
	Os03g0819600	OsCHI3	3	34394508	34395638	233	23892.8	4.94	Cytoplasm	I	OG1	4
	Os06g0203600	OsCHI4	6	5227416	5231610	428	47577.5	8.6	Nucleus	III	OG2	10
	Os07g0571600	OsCHI5	7	23076409	23078827	263	28521.5	10.02	Chloroplast	III	OG5	4
	Os11g0116300	OsCHI6	11	729514	732755	211	23397.5	4.49	Cytoplasm	IV	OG3	4
	Os12g0115700	OsCHI7	12	766441	768578	211	23487.6	4.55	Cytoplasm	IV	OG3	4
Zea mays	Zm00001d034635	ZmCHI1	1	298580972	298582430	231	23952.2	4.71	Cytoplasm	I	OG1	4
	Zm00001d006630	ZmCHI2	2	212957241	212960644	274	29276.2	8.64	Chloroplast	III	OG5	4
	Zm00001d044683	ZmCHI3	3	234824366	234825497	239	25347.3	4.33	Cytoplasm	IV	OG3	2
	Zm00001d052012	ZmCHI4	4	176575561	176580096	318	35940.3	7.33	Chloroplast	IV	OG8	5
	Zm00001d052107	ZmCHI5	4	179834335	179840234	567	62859.3	8.84	Endoplasmic Reticulum	III	OG2	12
	Zm00001d012972	ZmCHI6	5	2582304	2583969	231	23690	7.63	Cytoplasm	I	OG1	4
	Zm00001d016144	ZmCHI7	5	146540230	146542421	213	23620.6	5.08	Nucleus	III	OG4	4
	Zm00001d018278	ZmCHI8	5	217822234	217826421	425	47318.7	7.4	Cytoplasm	III	OG2	10
	Zm00001d035668	ZmCHI9	6	40159721	40164875	405	44953.2	8.96	Chloroplast	IV	OG8	6
	Zm00001d000357	ZmCHI10	B73V4_ctg48	39499	44930	321	35595.8	8.04	Cytoplasm	III	OG2	11
Triticum aestivum	TraesCS1A02G036200	TaCHI1	1A	20156565	20158534	266	28617.4	9.79	Chloroplast	III	OG4	5
	TraesCS1B02G046200	TaCHI2	1B	26134317	26136011	269	28838.7	9.93	Chloroplast	III	OG4	5
	TraesCS1D02G037900	TaCHI3	1D	18097506	18099493	284	30402.5	10.04	Chloroplast	III	OG4	5
	TraesCS2A02G197600	TaCHI4	2A	167101893	167114453	274	29240	9.71	Chloroplast	III	OG5	4
	TraesCS2D02G205600	TaCHI5	2D	157143944	157148000	274	29228.1	9.71	Chloroplast	III	OG5	4
	TraesCS5A02G146900	TaCHI6	5A	324075539	324076712	216	23544.4	4.44	Cytoplasm	IV	OG3	3
	TraesCS5A02G475600	TaCHI7	5A	650626732	650627980	229	23588.6	4.77	Cytoplasm	I	OG1	3
	TraesCS5B02G145800	TaCHI8	5B	273141244	273142463	216	23576.5	4.44	Cytoplasm	IV	OG3	3
	TraesCS5B02G488900	TaCHI9	5B	658890320	658891677	231	23785.8	5.07	Cytoplasm	I	OG1	3
	TraesCS5D02G145400	TaCHI10	5D	232135797	232137209	216	23562.4	4.44	Cytoplasm	IV	OG3	3
	TraesCS5D02G489000	TaCHI11	5D	524334560	524335791	231	23696.6	4.58	Cytoplasm	I	OG1	3
	TraesCS6A02G337200	TaCHI12	6A	571162434	571166466	423	47007.7	7.95	Cytoplasm	III	OG2	10
	TraesCS6B02G367900	TaCHI13	6B	641885353	641890023	424	47033.6	7.5	Cytoplasm	III	OG2	10
	TraesCS6D02G317800	TaCHI14	6D	426282611	426287827	423	47047.8	8.03	Nucleus	III	OG2	10
	TraesCS7A02G163700	TaCHI15	7A	120171813	120176643	417	46335	8.53	Cytoplasm	III	OG2	10
	TraesCS7B02G038200	TaCHI16	7B	37093624	37094994	224	24183	5.09	Cytoplasm	I	OG1	4
	TraesCS7B02G069500	TaCHI17	7B	74845626	74850245	417	46369.2	8.79	Cytoplasm	III	OG2	10
	TraesCS7D02G165800	TaCHI18	7D	115418262	115422870	417	46293.1	9.3	Cytoplasm	III	OG2	10
Arabidopsis thaliana	AT1G53520	AtCHI1	1	19976386	19978048	287	30728.6	8.6	Chloroplast	III	OG4	5
	AT2G26310	AtCHI2	2	11201303	11204170	398	44808.2	9.02	Nucleus	III	OG2	10
	AT3G55120	AtCHI3	3	20430059	20431597	246	26595.4	5.19	Chloroplast	I	OG1	4
	AT3G63170	AtCHI4	3	23334574	23336081	279	30394.1	7.62	Chloroplast	III	OG5	4
	AT5G05270	AtCHI5	5	1563286	1565324	209	23331.4	4.46	Cytoplasm	IV	OG3	4
	AT5G66230	AtCHI6	5	26461152	26463916	545	60105.3	4.78	Endoplasmic Reticulum	I	OG1	7
	AT5G66220	AtCHI7	5	26461177	26462174	174	19304.4	10.49	Nucleus	I	OG1	3
Brassica oleracea	Bo4g098170	BoCHI1	C4	24427339	24428474	284	31102.2	9.53	Chloroplast	III	OG5	4
	Bo4g160130	BoCHI2	C4	43469725	43471554	376	41644.4	8.86	Cytoplasm	III	OG2	9
	Bo6g031530	BoCHI3	C6	7694841	7696491	293	31335.5	9.49	Chloroplast	III	OG4	5
	Bo6g068550	BoCHI4	C6	19846607	19851261	252	27137	7.41	Chloroplast	I	OG1	4
	Bo7g117570	BoCHI5	C7	47048136	47049360	234	25477.2	4.71	Chloroplast	I	OG1	4
	Bo8g088480	BoCHI6	C8	29633489	29635122	251	27007.7	4.78	Chloroplast	I	OG1	4
	Bo8g089480	BoCHI7	C8	29642708	29649080	323	35172.8	7.3	Chloroplast	I	OG1	7
	Bo8g098500	BoCHI8	C8	33728701	33729996	338	37442.1	9.73	Mitochondrion	III	OG5	4
	Bo9g177250	BoCHI9	C9	52890098	52891220	209	23295.4	4.63	Cytoplasm	IV	OG3	4
Chenopodium quinoa	AUR62020283	CqCHI1	Scaffold_1373	311854	320749	417	46161.7	8.32	PlasmaMembrane	III	OG2	10
	AUR62020546	CqCHI2	Scaffold_1373	3950239	3951829	74	7788.6	4.08	Cytoplasm	I	OG1	3
	AUR62020547	CqCHI3	Scaffold_1373	3953558	3957145	249	26896.2	4.92	Cytoplasm	I	OG1	4
	AUR62019681	CqCHI4	Scaffold_2127	8535086	8537131	208	22539.7	6.79	Cytoplasm	III	OG4	4
	AUR62027261	CqCHI5	Scaffold_2924	1281192	1284241	94	10511.2	10.33	Cytoplasm	I	OG1	2
	AUR62036022	CqCHI6	Scaffold_3416	288019	294407	288	31813.8	6.72	Chloroplast	III	OG5	4
	AUR62030612	CqCHI7	Scaffold_3631	1159082	1162008	207	23074.2	4.52	Cytoplasm	IV	OG3	4
Chlamydomonas reinhardtii	CHLRE_01g007600v5	CrCHI1	1	1477328	1482810	260	27730.5	9.5	Chloroplast	III	OG2	9
	CHLRE_10g446800v5	CrCHI2	10	3776653	3780574	477	49621.6	9.7	Nucleus	Outgroup	OG2	6
	CHLRE_12g517100v5	CrCHI3	12	4022383	4026529	261	28489.2	9.55	Chloroplast	III	OG4	8
Cannabis sativa	evm.TU.01.934	CsCHI1	1	14582727	14585013	296	32520.8	10.06	Chloroplast	III	OG5	4
	evm.TU.01.1141	CsCHI2	1	21190614	21194448	425	47183.6	8.61	Nucleus	III	OG2	10
	evm.TU.02.8	CsCHI3	2	143441	144909	209	23571.7	4.56	Cytoplasm	IV	OG3	4
	evm.TU.05.897	CsCHI4	5	35909305	35914227	266	28955.7	5.84	Chloroplast	I	OG1	4
	evm.TU.10.1952	CsCHI5	10	58547119	58548263	195	21833	5.5	Nucleus	III	OG7	4
Glycine max	GLYMA_03G154600	GmCHI1	3	36969471	36974353	237	26159.7	10.15	Chloroplast&Mitochondrial	III	OG5	4
	GLYMA_04G222400	GmCHI2	4	49304081	49306117	209	23562.5	4.67	Cytoplasm	IV	OG3	4
	GLYMA_06G143000	GmCHI3	6	11642031	11644022	209	23495.5	4.59	Cytoplasm	IV	OG3	4
	GLYMA_10G292200	GmCHI4	10	51006927	51009538	226	24972	4.91	Chloroplast	II	OG1	4
	GLYMA_13G262500	GmCHI5	13	36603843	36608523	301	32482.8	9.62	Chloroplast	III	OG4	6
	GLYMA_14G098100	GmCHI6	14	9259148	9266365	414	45986.6	9.46	Cytoplasm	III	OG2	10
	GLYMA_15G242900	GmCHI7	15	46403868	46408623	281	30254.9	9.36	Chloroplast	III	OG4	5
	GLYMA_17G226600	GmCHI8	17	38105929	38111302	413	46186	9.58	Nucleus	III	OG2	10
	GLYMA_19G156900	GmCHI9	19	41733799	41736875	275	30374.2	8.19	Chloroplast	III	OG5	4
	GLYMA_20G241500	GmCHI10	20	47259311	47261877	218	23264.6	6.69	Cytoplasm	II	OG1	4
	GLYMA_20G241600	GmCHI11	20	47264269	47266795	226	25027.1	5.02	Chloroplast	II	OG1	4
	GLYMA_20G241700	GmCHI12	20	47267106	47268550	228	24881.4	6.35	Chloroplast	I	OG1	3
Physcomitrella patens	Pp3c1_6310	PpCHI1	1	4878016	4878585	189	21580.3	9.69	Cytoplasm	IV	OG3	1
	Pp3c4_25770	PpCHI2	4	17221334	17223368	212	23260	4.22	Cytoplasm	IV	OG3	3
	Pp3c10_20100	PpCHI3	10	13870218	13873226	327	34235.9	8.75	Cytoplasm	III	OG4	6
	Pp3c11_25580	PpCHI4	11	16729833	16732994	289	31228.5	8.76	Chloroplast	III	OG5	5
	Pp3c18_4460	PpCHI5	18	3427355	3430706	224	25071.8	9.55	Chloroplast	III	OG6	8
	Pp3c21_9340	PpCHI6	21	6156124	6160708	439	47818	7.72	Nucleus	III	OG2	10
	Pp3c26_4040	PpCHI7	26	2045605	2047823	209	22894.5	4.22	Cytoplasm	IV	OG3	3
Populus trichocarpa	POPTR_002G052200v3	PtCHI1	2	3457423	3459954	218	23762	10.37	Chloroplast	III	OG5	2
	POPTR_006G219600v3	PtCHI2	6	23200630	23205898	430	47498	8.94	Nucleus	III	OG2	10
	POPTR_010G213000v3	PtCHI3	10	20119814	20121677	168	18419.2	5.97	Chloroplast	I	OG1	3
	POPTR_011G101800v3	PtCHI4	11	12446356	12450833	282	30427.2	8.09	Nucleus	III	OG4	5
	POPTR_018G048500v3	PtCHI5	18	4593931	4598910	431	47439.9	7.14	Nucleus	III	OG2	10
	POPTR_019G057800v3	PtCHI6	19	8950582	8952562	206	22981.2	4.78	Cytoplasm	IV	OG3	4
Solanum lycopersicum	Solyc02g067870.3	SlCHI1	2	38533897	38535685	262	28973.5	5.35	Cytoplasm	III	OG7	4
	Solyc05g010310.3	SlCHI2	5	4461115	4462958	222	24177.6	6.04	Cytoplasm	I	OG1	4
	Solyc05g010320.3	SlCHI3	5	4466476	4468138	204	22489.4	4.36	Extracellular	I	OG1	3
	Solyc05g052240.3	SlCHI4	5	63361803	63364587	209	23647.9	4.46	Cytoplasm	IV	OG3	4
	Solyc06g084260.3	SlCHI5	6	49502789	49508003	295	32624.7	9.28	Chloroplast	III	OG5	4
	Solyc07g062030.3	SlCHI6	7	65004560	65009126	274	29538.4	8.15	Chloroplast	III	OG4	5
	Solyc08g061480.3	SlCHI7	8	48835692	48842518	412	46637.8	7.9	Nucleus	III	OG2	10
Selaginella moellendorffii	SELMODRAFT_227414	SmCHI1	GL377568	4015233	4016156	205	22877.8	4.4	Nucleus	IV	OG3	4
	SELMODRAFT_97953	SmCHI2	GL377585	1049836	1050257	122	13302	9.49	Chloroplast	III	OG4	2
	SELMODRAFT_151616	SmCHI3	GL377597	1658198	1659057	217	23315.5	4.75	Nucleus	I	OG1	4
	SELMODRAFT_112032	SmCHI4	GL377608	232193	233068	185	20769.8	9.62	Chloroplast	III	OG2	7
	SELMODRAFT_444624	SmCHI5	GL377610	1238335	1240003	216	23119.3	4.77	Nucleus	I	OG1	4
	SELMODRAFT_125981	SmCHI6	GL377646	472896	473768	185	20827.9	9.39	Nucleus	III	OG2	7
	SELMODRAFT_447240	SmCHI7	GL377652	185589	186530	216	23955	4.67	Nucleus	IV	OG3	4
	SELMODRAFT_136990	SmCHI8	GL377719	123574	124171	169	18624.1	9.58	Chloroplast	III	OG4	3
Ceratopteris richardii	Ceric.06G079000	CriCHI1	Chr06	180558281	180619068	393	43544.6	9.3	Chloroplast	III	OG2	10
	Ceric.09G016600	CriCHI2	Chr09	37367599	37370201	215	23773.8	4.38	Cytoplasm	IV	OG3	4
	Ceric.20G092200	CriCHI3	Chr20	178316696	178321135	294	31580.6	9.22	Chloroplast	III	OG5	4
	Ceric.30G070500	CriCHI4	Chr30	145484222	145490898	270	30504	7.07	Cytoplasm	III	OG2	9
	Ceric.32G056800	CriCHI5	Chr32	96357748	96490217	230	25871.8	9.57	Chloroplast	III	OG6	8
	Ceric.32G072000	CriCHI6	Chr32	134321925	134380396	217	24443.9	8.88	Nucleus	III	OG2	9
	Ceric.33G035400	CriCHI7	Chr33	85918623	85921757	222	23700.1	5.37	Cytoplasm	I	OG1	4
	Ceric.37G007100	CriCHI8	Chr37	13710988	13755895	270	28948	8.03	Chloroplast	III	OG4	5
Picea abies	MA_118809g0010	PaCHI1	MA_118809	5358	10775	428	45891.4	5.08	Cytoplasm	I	OG1	8
	MA_161192g0010	PaCHI2	MA_161192	10983	14347	257	27779	7.84	Mitochondrion	I	OG1	6
	MA_28336g0010	PaCHI3	MA_28336	4796	15504	300	32979.6	9.73	Chloroplast	III	OG5	4
	MA_502949g0010	PaCHI4	MA_502949	1564	3029	305	34021.7	7.97	Chloroplast	IV	OG3	6
	MA_111479g0010	PaCHI5	MA_111479	8389	11343	158	17164.7	8.48	Chloroplast	I	OG1	3
	MA_33386g0010	PaCHI6	MA_33386	28769	32669	181	20614.4	8.19	Nucleus	III	OG5	4
	MA_652505g0010	PaCHI7	MA_652505	2227	2556	109	12350.5	9.81	Chloroplast	IV	OG1	1
	MA_10437223g0020	PaCHI8	MA_10437223	8225	12973	200	21859.1	9.8	Chloroplast	III	OG4	3
aa: amino acids. Chr: chromosome locations.MW: molecular weight. pI: theoretical isoelectric point.OG: orthologous group.
