# Supplementary material for: Genome-Wide Classification and Evolutionary Analysis Reveal Diverged Patterns of Chalcone Isomerase in Plants
Source: Biomolecules. 2022 Jul 8;12(7):961. doi: 10.3390/biom12070961 (PMC9313115; doi:10.3390/biom12070961)
Supplement: Supplementary file 1 [file biomolecules-12-00961-s001.zip › Table S4 Eight OGs were list in the 15 green plants.xlsx]

## Sheet: Sheet1
Table S4. Eight OGs were list in the 15 green plants
Orthogroups
	OG1	OG2	OG3	OG4	OG5	OG6	OG7	OG8
AtCHI	AtCHI3 AtCHI6 AtCHI7	AtCHI2	AtCHI5	AtCHI1	AtCHI4
BoCHI	BoCHI4 BoCHI5 BoCHI6 BoCHI7	BoCHI2	BoCHI9	BoCHI3	BoCHI1 BoCHI8
CqCHI	CqCHI2 CqCHI3 CqCHI5	CqCHI1	CqCHI7	CqCHI4	CqCHI6
CrCHI		CrCHI1 CrCHI2		CrCHI3
CriCHI	CriCHI7	CriCHI1 CriCHI4 CriCHI6	CriCHI2	CriCHI8	CriCHI3	CriCHI5
CsCHI	CsCHI4	CsCHI2	CsCHI3		CsCHI1		CsCHI5
GmCHI	GmCHI10 GmCHI11 GmCHI12 GmCHI4	GmCHI6 GmCHI8	GmCHI2 GmCHI3	GmCHI5 GmCHI7	GmCHI1 GmCHI9
OsCHI	OsCHI3	OsCHI2 OsCHI4	OsCHI6 OsCHI7	OsCHI1	OsCHI5
PaCHI	PaCHI1 PaCHI2 PaCHI5 PaCHI7		PaCHI4	PaCHI8	PaCHI3 PaCHI6
PpCHI		PpCHI6	PpCHI1 PpCHI2 PpCHI7	PpCHI3	PpCHI4	PpCHI5
PtCHI	PtCHI3	PtCHI2 PtCHI5	PtCHI6	PtCHI4	PtCHI1
SlCHI	SlCHI2 SlCHI3	SlCHI7	SlCHI4	SlCHI6	SlCHI5		SlCHI1
SmCHI	SmCHI3 SmCHI5	SmCHI4 SmCHI6	SmCHI1 SmCHI7	SmCHI2 SmCHI8
TaCHI	TaCHI11 TaCHI16 TaCHI7 TaCHI9	TaCHI12 TaCHI13 TaCHI14 TaCHI15 TaCHI17 TaCHI18	TaCHI10 TaCHI6 TaCHI8	TaCHI1 TaCHI2 TaCHI3	TaCHI4 TaCHI5
ZmCHI	ZmCHI1 ZmCHI6	ZmCHI10 ZmCHI5 ZmCHI8	ZmCHI3	ZmCHI7	ZmCHI2			ZmCHI4 ZmCHI9
