# Supplementary material for: Genome-Wide Classification and Evolutionary Analysis Reveal Diverged Patterns of Chalcone Isomerase in Plants
Source: Biomolecules. 2022 Jul 8;12(7):961. doi: 10.3390/biom12070961 (PMC9313115; doi:10.3390/biom12070961)
Supplement: Supplementary file 1 [file biomolecules-12-00961-s001.zip › Table S5 The detail information on 3D homology mode of 122 CHIs.xlsx]

## Sheet: Sheet1
Table S5. Detail information on 3D homology mode of 122 CHIs
Proteins	Template	Seq ID	Seq Sim	Cov	Resolu	Method	GMQE	Found By	Oligo-State	Ligands	Description
OsCHI3	5yx4.1.A	79.13	0.536	0.987	2.1	X-ray	0.927	HHblits	monomer	1 x HCC	Chalcone-flavonone isomerase family protein
OsCHI4	4doo.2.A	34.483	0.386	0.474	1.9	X-ray	0.369	HHblits	monomer	None	Chalcone-flavanone isomerase family protein
OsCHI2	4doo.2.A	35.468	0.387	0.475	1.9	X-ray	0.363	HHblits	monomer	None	Chalcone-flavanone isomerase family protein
OsCHI5	4doo.2.A	57.5	0.473	0.76	1.9	X-ray	0.692	HHblits	monomer	1 x DAO	Chalcone-flavanone isomerase family protein
OsCHI6	4dok.1.A	62.927	0.484	0.972	1.7	X-ray	0.898	HHblits	monomer	None	Chalcone-flavanone isomerase family protein
OsCHI1	4dol.1.A	47.03	0.411	0.721	1.7	X-ray	0.612	HHblits	monomer	None	Arabidopsis thaliana fatty-acid binding protein At1g53520 (AtFAP3)
OsCHI7	4dok.1.A	62.439	0.482	0.972	1.7	X-ray	0.894	HHblits	monomer	None	Chalcone-flavanone isomerase family protein
TaCHI10	4dok.1.A	62.376	0.478	0.935	1.7	X-ray	0.845	HHblits	monomer	None	Similarity to chalcone-flavonone isomerase
TaCHI6	4dok.1.A	61.084	0.474	0.94	1.7	X-ray	0.851	BLAST	monomer	None	Similarity to chalcone-flavonone isomerase
TaCHI18	4doo.2.A	33.831	0.384	0.482	1.9	X-ray	0.362	BLAST	monomer	None	Chalcone-flavanone isomerase family protein
TaCHI4	4doo.2.A	59.204	0.477	0.734	1.9	X-ray	0.661	HHblits	monomer	1 x DAO	Chalcone-flavanone isomerase family protein
TaCHI8	4dok.1.A	62.069	0.476	0.94	1.7	X-ray	0.852	BLAST	monomer	None	Similarity to chalcone-flavonone isomerase
TaCHI17	4doo.2.A	33.831	0.383	0.482	1.9	X-ray	0.363	BLAST	monomer	None	Chalcone-flavanone isomerase family protein
TaCHI2	4dol.1.A	49.261	0.41	0.755	1.7	X-ray	0.635	HHblits	monomer	None	Arabidopsis thaliana fatty-acid binding protein At1g53520 (AtFAP3)
TaCHI3	4dol.1.A	49.261	0.411	0.715	1.7	X-ray	0.595	HHblits	monomer	None	Arabidopsis thaliana fatty-acid binding protein At1g53520 (AtFAP3)
TaCHI1	4dol.1.A	49.261	0.41	0.763	1.7	X-ray	0.642	HHblits	monomer	None	Arabidopsis thaliana fatty-acid binding protein At1g53520 (AtFAP3)
TaCHI5	4doo.2.A	57.711	0.471	0.734	1.9	X-ray	0.656	HHblits	monomer	1 x DAO	Chalcone-flavanone isomerase family protein
TaCHI12	4doo.2.A	34.483	0.39	0.48	1.9	X-ray	0.37	HHblits	monomer	None	Chalcone-flavanone isomerase family protein
TaCHI11	5yx4.1.A	85.714	0.55	1	2.1	X-ray	0.95	HHblits	monomer	1 x HCC	Chalcone-flavonone isomerase family protein
TaCHI7	5yx4.1.A	87.336	0.555	1	2.1	X-ray	0.951	HHblits	monomer	1 x HCC	Chalcone-flavonone isomerase family protein
TaCHI9	5yx4.1.A	85.281	0.549	1	2.1	X-ray	0.951	HHblits	monomer	1 x HCC	Chalcone-flavonone isomerase family protein
TaCHI15	4doo.2.A	34.328	0.385	0.482	1.9	X-ray	0.364	BLAST	monomer	None	Chalcone-flavanone isomerase family protein
TaCHI14	4doo.2.A	33.99	0.388	0.48	1.9	X-ray	0.366	HHblits	monomer	None	Chalcone-flavanone isomerase family protein
TaCHI13	4doo.2.A	33.498	0.388	0.479	1.9	X-ray	0.364	HHblits	monomer	None	Chalcone-flavanone isomerase family protein
TaCHI16	4doi.1.A	49.065	0.411	0.955	1.55	X-ray	0.803	HHblits	monomer	None	Chalcone--flavonone isomerase 1
ZmCHI4	1xq9.1.A	45.714	0.407	0.44	2.58	X-ray	0.302	HHblits	monomer	None	2,3-bisphosphoglycerate-dependent phosphoglycerate mutase
ZmCHI2	4doo.2.A	57.921	0.477	0.737	1.9	X-ray	0.672	HHblits	monomer	1 x DAO	Chalcone-flavanone isomerase family protein
ZmCHI5	4doo.2.A	34.409	0.378	0.328	1.9	X-ray	0.23	HHblits	monomer	None	Chalcone-flavanone isomerase family protein
ZmCHI3	4dok.1.A	58.537	0.464	0.858	1.7	X-ray	0.762	HHblits	monomer	None	Similarity to chalcone-flavonone isomerase
ZmCHI1	5yx4.1.A	77.826	0.53	0.996	2.1	X-ray	0.925	HHblits	monomer	1 x HCC	Chalcone-flavonone isomerase family protein
ZmCHI7	4dol.1.A	46.512	0.408	0.808	1.7	X-ray	0.637	BLAST	monomer	None	Arabidopsis thaliana fatty-acid binding protein At1g53520 (AtFAP3)
ZmCHI10	4doo.2.A	31.527	0.377	0.632	1.9	X-ray	0.472	HHblits	monomer	None	Chalcone-flavanone isomerase family protein
ZmCHI8	4doo.2.A	36.139	0.391	0.475	1.9	X-ray	0.368	HHblits	monomer	None	Chalcone-flavanone isomerase family protein
ZmCHI9	7cyz.2.A	27.727	0.337	0.543	2.1	X-ray	0.329	HHblits	monomer	None	Oxysterol-binding protein-related protein 3
ZmCHI6	5yx4.1.A	75.217	0.52	0.996	2.1	X-ray	0.914	HHblits	monomer	1 x HCC	Chalcone-flavonone isomerase family protein
AtCHI3	4doi.1.A	100	0.602	1	1.55	X-ray	0.946	HHblits	monomer	None	Chalcone--flavonone isomerase 1
AtCHI1	4dol.1.A	99.078	0.592	0.756	1.7	X-ray	0.723	BLAST	monomer	1 x PLM	Arabidopsis thaliana fatty-acid binding protein At1g53520 (AtFAP3)
AtCHI6	4doi.1.A	65.728	0.489	0.391	1.55	X-ray	0.269	HHblits	monomer	None	Chalcone--flavonone isomerase 1
AtCHI2	4doo.2.A	32.673	0.366	0.508	1.9	X-ray	0.354	HHblits	monomer	None	Chalcone-flavanone isomerase family protein
AtCHI7	4doi.1.A	65.432	0.491	0.931	1.55	X-ray	0.846	HHblits	monomer	None	Chalcone--flavonone isomerase 1
AtCHI4	4doo.2.A	100	0.606	0.735	1.9	X-ray	0.725	BLAST	monomer	2 x DAO, 1 x K	Chalcone-flavanone isomerase family protein
AtCHI5	4dok.1.A	100	0.606	0.981	1.7	X-ray	0.972	HHblits	monomer	None	Similarity to chalcone-flavonone isomerase
BoCHI3	4dol.1.A	83.256	0.541	0.734	1.7	X-ray	0.678	BLAST	monomer	1 x PLM	Arabidopsis thaliana fatty-acid binding protein At1g53520 (AtFAP3)
BoCHI5	4doi.1.A	74.324	0.512	0.949	1.55	X-ray	0.896	BLAST	monomer	None	Chalcone--flavonone isomerase 1
BoCHI7	4doi.1.A	72.881	0.509	0.731	1.55	X-ray	0.64	BLAST	monomer	None	Chalcone--flavonone isomerase 1
BoCHI8	4doo.2.A	73.869	0.516	0.589	1.9	X-ray	0.508	HHblits	monomer	None	Chalcone-flavanone isomerase family protein
BoCHI9	4dok.1.A	91.707	0.585	0.981	1.7	X-ray	0.959	HHblits	monomer	None	Similarity to chalcone-flavonone isomerase
BoCHI2	4doo.2.A	34.975	0.373	0.54	1.9	X-ray	0.39	HHblits	monomer	None	Chalcone-flavanone isomerase family protein
BoCHI6	4doi.1.A	83.539	0.547	0.968	1.55	X-ray	0.894	BLAST	monomer	None	Chalcone--flavonone isomerase 1
BoCHI1	4doo.2.A	88.78	0.571	0.722	1.9	X-ray	0.702	BLAST	monomer	2 x DAO, 1 x K	Chalcone-flavanone isomerase family protein
BoCHI4	4doi.1.A	83.951	0.55	0.964	1.55	X-ray	0.898	BLAST	monomer	None	Chalcone--flavonone isomerase 1
CqCHI2	6ms8.5.A	57.377	0.468	0.824	1.9	X-ray	0.658	HHblits	monomer	None	Chalcone-flavonone isomerase family protein
CqCHI6	4doo.2.A	57.843	0.469	0.708	1.9	X-ray	0.635	HHblits	monomer	2 x DAO, 1 x K	Chalcone-flavanone isomerase family protein
CqCHI7	4dok.1.A	58.128	0.462	0.981	1.7	X-ray	0.861	HHblits	monomer	None	Similarity to chalcone-flavonone isomerase
CqCHI5	6ms8.3.A	59.155	0.482	0.755	1.9	X-ray	0.633	HHblits	monomer	None	Chalcone-flavonone isomerase family protein
CqCHI4	4dol.1.A	67.788	0.495	1	1.7	X-ray	0.899	BLAST	monomer	1 x PLM	Arabidopsis thaliana fatty-acid binding protein At1g53520 (AtFAP3)
CqCHI3	4doi.1.A	64.192	0.478	0.92	1.55	X-ray	0.808	BLAST	monomer	None	Chalcone--flavonone isomerase 1
CqCHI1	4doo.1.A	33.168	0.374	0.484	1.9	X-ray	0.358	HHblits	monomer	None	Chalcone-flavanone isomerase family protein
CrCHI1	4dol.1.A	33.166	0.359	0.765	1.7	X-ray	0.558	HHblits	monomer	None	Arabidopsis thaliana fatty-acid binding protein At1g53520 (AtFAP3)
CrCHI2	5wl5.1.A	23.118	0.307	0.39	1.513	X-ray	0.201	HHblits	monomer	None	Engineered Chalcone Isomerase ancR5
CrCHI3	4dol.1.A	25.628	0.333	0.762	1.7	X-ray	0.504	HHblits	monomer	None	Arabidopsis thaliana fatty-acid binding protein At1g53520 (AtFAP3)
CsCHI4	4doi.1.A	61.927	0.479	0.82	1.55	X-ray	0.754	HHblits	monomer	None	Chalcone--flavonone isomerase 1
CsCHI3	4dok.1.A	69.118	0.506	0.976	1.7	X-ray	0.895	BLAST	monomer	None	Similarity to chalcone-flavonone isomerase
CsCHI1	4doo.1.A	65.025	0.492	0.686	1.9	X-ray	0.629	HHblits	monomer	1 x DAO	Chalcone-flavanone isomerase family protein
CsCHI5	4doo.2.A	30.726	0.365	0.918	1.9	X-ray	0.714	HHblits	monomer	None	Chalcone-flavanone isomerase family protein
CsCHI2	4doo.1.A	31.527	0.367	0.478	1.9	X-ray	0.362	HHblits	monomer	None	Chalcone-flavanone isomerase family protein
GmCHI1	4doo.1.A	63.743	0.488	0.722	1.9	X-ray	0.639	HHblits	monomer	None	Chalcone-flavanone isomerase family protein
GmCHI2	4dok.1.A	60.784	0.472	0.976	1.7	X-ray	0.89	BLAST	monomer	None	Similarity to chalcone-flavonone isomerase
GmCHI3	4dok.1.A	62.255	0.475	0.976	1.7	X-ray	0.894	BLAST	monomer	None	Similarity to chalcone-flavonone isomerase
GmCHI4	6cjo.1.A	65.596	0.485	0.965	2.4	X-ray	0.889	HHblits	monomer	None	Chalcone--flavonone isomerase 1
GmCHI5	4dol.1.A	62.857	0.481	0.698	1.7	X-ray	0.619	HHblits	monomer	1 x PLM	Arabidopsis thaliana fatty-acid binding protein At1g53520 (AtFAP3)
GmCHI6	4doo.2.A	36.548	0.379	0.476	1.9	X-ray	0.359	BLAST	monomer	None	Chalcone-flavanone isomerase family protein
GmCHI7	4dol.1.A	63.636	0.483	0.744	1.7	X-ray	0.68	HHblits	monomer	1 x PLM	Arabidopsis thaliana fatty-acid binding protein At1g53520 (AtFAP3)
GmCHI8	4doo.2.A	34.975	0.375	0.492	1.9	X-ray	0.362	HHblits	monomer	None	Chalcone-flavanone isomerase family protein
GmCHI9	4doo.1.A	66.667	0.497	0.731	1.9	X-ray	0.682	HHblits	monomer	1 x DAO	Chalcone-flavanone isomerase family protein
GmCHI11	6cjo.1.A	65.438	0.484	0.96	2.4	X-ray	0.885	HHblits	monomer	None	Chalcone--flavonone isomerase 1
GmCHI10	6cjo.1.A	81.776	0.543	0.982	2.4	X-ray	0.935	BLAST	monomer	None	Chalcone--flavonone isomerase 1
GmCHI12	6ms8.4.A	74.208	0.516	0.969	1.9	X-ray	0.878	BLAST	monomer	None	Chalcone-flavonone isomerase family protein
PpCHI1	5wl8.2.A	55.357	0.446	0.296	1.58	X-ray	0.124	HHblits	monomer	None	Engineered Chalcone Isomerase epR4
PpCHI4	4doo.2.A	53.96	0.452	0.699	1.9	X-ray	0.62	HHblits	monomer	None	Chalcone-flavanone isomerase family protein
PpCHI3	4dol.1.A	43.478	0.413	0.633	1.7	X-ray	0.5	HHblits	monomer	None	Arabidopsis thaliana fatty-acid binding protein At1g53520 (AtFAP3)
PpCHI5	4doo.2.A	20.809	0.313	0.772	1.9	X-ray	0.503	HHblits	monomer	None	Chalcone-flavanone isomerase family protein
PpCHI2	5wks.1.A	56.872	0.466	0.995	1.5	X-ray	0.887	HHblits	monomer	None	Engineered Chalcone Isomerase ancR1
PpCHI6	4doo.2.A	40.887	0.402	0.462	1.9	X-ray	0.346	HHblits	monomer	None	Chalcone-flavanone isomerase family protein
PpCHI7	5wks.1.A	55.556	0.461	0.99	1.5	X-ray	0.882	HHblits	monomer	None	Engineered Chalcone Isomerase ancR1
PtCHI1	4doo.1.A	64.286	0.487	0.578	1.9	X-ray	0.417	BLAST	monomer	None	Chalcone-flavanone isomerase family protein
PtCHI2	4doo.1.A	33.498	0.376	0.472	1.9	X-ray	0.348	HHblits	monomer	None	Chalcone-flavanone isomerase family protein
PtCHI3	4doi.1.A	68.072	0.51	0.988	1.55	X-ray	0.879	BLAST	monomer	None	Chalcone--flavonone isomerase 1
PtCHI4	4dol.1.A	69.194	0.492	0.748	1.7	X-ray	0.688	HHblits	monomer	1 x PLM	Arabidopsis thaliana fatty-acid binding protein At1g53520 (AtFAP3)
PtCHI5	4doo.1.A	35.468	0.382	0.471	1.9	X-ray	0.346	HHblits	monomer	None	Chalcone-flavanone isomerase family protein
PtCHI6	4dok.1.A	69.951	0.508	0.985	1.7	X-ray	0.916	BLAST	monomer	None	Similarity to chalcone-flavonone isomerase
SlCHI4	4dok.1.A	65.025	0.5	0.971	1.7	X-ray	0.889	BLAST	monomer	None	Similarity to chalcone-flavonone isomerase
SlCHI2	4doi.1.A	61.29	0.478	0.977	1.55	X-ray	0.889	HHblits	monomer	None	Chalcone--flavonone isomerase 1
SlCHI7	4doo.2.A	35.961	0.381	0.493	1.9	X-ray	0.357	HHblits	monomer	None	Chalcone-flavanone isomerase family protein
SlCHI6	4dol.1.A	69.626	0.498	0.781	1.7	X-ray	0.701	BLAST	monomer	1 x PLM	Arabidopsis thaliana fatty-acid binding protein At1g53520 (AtFAP3)
SlCHI1	4doo.2.A	39.899	0.402	0.756	1.9	X-ray	0.628	HHblits	monomer	None	Chalcone-flavanone isomerase family protein
SlCHI5	4doo.2.A	57.143	0.461	0.688	1.9	X-ray	0.612	HHblits	monomer	None	Chalcone-flavanone isomerase family protein
SlCHI3	4doi.1.A	62.051	0.482	0.956	1.55	X-ray	0.854	HHblits	monomer	None	Chalcone--flavonone isomerase 1
SmCHI2	4dol.1.A	43.443	0.405	1	1.7	X-ray	0.827	BLAST	monomer	None	Arabidopsis thaliana fatty-acid binding protein At1g53520 (AtFAP3)
SmCHI6	4doo.2.A	35.326	0.387	0.995	1.9	X-ray	0.824	HHblits	monomer	None	Chalcone-flavanone isomerase family protein
SmCHI3	5wl3.2.A	36.493	0.381	0.972	2.4	X-ray	0.768	HHblits	monomer	None	Engineered Chalcone Isomerase ancR2
SmCHI8	4dol.1.A	41.071	0.396	0.994	1.7	X-ray	0.803	HHblits	monomer	None	Arabidopsis thaliana fatty-acid binding protein At1g53520 (AtFAP3)
SmCHI5	5wl3.2.A	37.915	0.386	0.977	2.4	X-ray	0.789	HHblits	monomer	None	Engineered Chalcone Isomerase ancR2
SmCHI4	4doo.2.A	35.326	0.386	0.995	1.9	X-ray	0.821	HHblits	monomer	None	Chalcone-flavanone isomerase family protein
SmCHI7	5wl8.2.A	44.279	0.405	0.931	1.58	X-ray	0.744	HHblits	monomer	None	Engineered Chalcone Isomerase epR4
SmCHI1	5wl8.2.A	46	0.41	0.976	1.58	X-ray	0.798	HHblits	monomer	None	Engineered Chalcone Isomerase epR4
CriCHI3	4doo.2.A	49.505	0.439	0.689	1.9	X-ray	0.584	HHblits	monomer	1 x K	Chalcone-flavanone isomerase family protein
CriCHI2	5wks.1.A	46.667	0.427	0.981	1.5	X-ray	0.816	HHblits	monomer	None	Engineered Chalcone Isomerase ancR1
CriCHI6	4doo.2.A	30.882	0.37	0.944	1.9	X-ray	0.762	HHblits	monomer	None	Chalcone-flavanone isomerase family protein
CriCHI5	4doo.2.A	23.757	0.318	0.79	1.9	X-ray	0.536	HHblits	monomer	None	Chalcone-flavanone isomerase family protein
CriCHI7	4doi.1.A	40.758	0.395	0.955	1.55	X-ray	0.772	HHblits	monomer	None	Chalcone--flavonone isomerase 1
CriCHI4	4doo.1.A	30.198	0.362	0.751	1.9	X-ray	0.569	HHblits	monomer	None	Chalcone-flavanone isomerase family protein
CriCHI8	4dol.1.A	42.995	0.414	0.77	1.7	X-ray	0.639	BLAST	monomer	None	Arabidopsis thaliana fatty-acid binding protein At1g53520 (AtFAP3)
CriCHI1	4doo.2.A	43.35	0.415	0.518	1.9	X-ray	0.401	HHblits	monomer	None	Chalcone-flavanone isomerase family protein
PaCHI1	6ms8.3.A	55.869	0.46	0.498	1.9	X-ray	0.381	HHblits	monomer	None	Chalcone-flavonone isomerase family protein
PaCHI2	4doi.1.A	47.685	0.431	0.844	1.55	X-ray	0.701	HHblits	monomer	None	Chalcone--flavonone isomerase 1
PaCHI3	4doo.2.A	52.217	0.453	0.677	1.9	X-ray	0.586	HHblits	monomer	None	Chalcone-flavanone isomerase family protein
PaCHI4	4dok.1.A	60.591	0.479	0.666	1.7	X-ray	0.576	BLAST	monomer	None	Similarity to chalcone-flavonone isomerase
PaCHI5	6ms8.3.A	28.155	0.341	0.652	1.9	X-ray	0.373	HHblits	monomer	None	Chalcone-flavonone isomerase family protein
PaCHI6	4doo.2.A	47.647	0.424	0.944	1.9	X-ray	0.821	HHblits	monomer	None	Chalcone-flavanone isomerase family protein
PaCHI7	5yx3.1.A	47.826	0.407	0.422	2.7	X-ray	0.265	HHblits	monomer	None	Chalcone-flavonone isomerase family protein
PaCHI8	4dol.1.A	52.083	0.439	0.96	1.7	X-ray	0.823	BLAST	monomer	None	Arabidopsis thaliana fatty-acid binding protein At1g53520 (AtFAP3)
