# Supplementary material for: Genome-Wide Classification and Evolutionary Analysis Reveal Diverged Patterns of Chalcone Isomerase in Plants
Source: Biomolecules. 2022 Jul 8;12(7):961. doi: 10.3390/biom12070961 (PMC9313115; doi:10.3390/biom12070961)
Supplement: Supplementary file 1 [file biomolecules-12-00961-s001.zip › Table S6 KaKs analysis for the duplicated CHI orthologs in green plants.xlsx]

## Sheet: Sheet1
Table S6.Ka/Ks analysis for the duplicated CHI orthologs in green plants
Duplicated pairs	Ka	Ks	Ka/Ks	Purifying selection
OsCHI2-ZmCHI5	0.1023	0.5528	0.185058	YES
OsCHI2-ZmCHI8	0.0562	0.4582	0.122654	YES
OsCHI2-TaCHI12	0.0446	0.5278	0.0845017	YES
OsCHI2-TaCHI13	0.056	0.4649	0.120456	YES
OsCHI2-TaCHI14	0.0505	0.4544	0.111136	YES
OsCHI2-TaCHI17	0.1304	0.5922	0.220196	YES
OsCHI2-TaCHI18	1.2634	1.8887	0.668926	YES
OsCHI3-ZmCHI1	0.0704	0.1942	0.362513	YES
OsCHI3-ZmCHI6	0.0981	0.2987	0.328423	YES
OsCHI3-TaCHI7	0.0762	0.2647	0.287873	YES
OsCHI3-TaCHI9	0.0764	0.1922	0.397503	YES
OsCHI3-TaCHI11	0.0703	0.215	0.326977	YES
OsCHI4-ZmCHI5	0.1689	0.6795	0.248565	YES
OsCHI4-TaCHI15	0.0632	0.3683	0.171599	YES
OsCHI4-TaCHI17	0.0752	0.3975	0.189182	YES
OsCHI4-TaCHI18	0.0692	0.3408	0.203052	YES
OsCHI5-ZmCHI2	0.074	0.6461	0.114533	YES
OsCHI5-TaCHI4	0.0388	0.8037	0.0482767	YES
OsCHI5-TaCHI5	0.0445	0.8566	0.0519496	YES
OsCHI6-ZmCHI3	0.173	1.6784	0.103074	YES
OsCHI6-TaCHI6	0.1388	1.7712	0.078365	YES
OsCHI6-TaCHI8	0.1321	1.6221	0.0814376	YES
OsCHI6-TaCHI10	0.1384	2.429	0.0569782	YES
OsCHI7-ZmCHI3	0.1728	1.5673	0.110253	YES
OsCHI7-TaCHI6	0.1522	1.4565	0.104497	YES
OsCHI7-TaCHI8	0.1454	1.3548	0.107322	YES
OsCHI7-TaCHI10	0.1385	2.0444	0.067746	YES
TaCHI4-ZmCHI2	0.0617	0.5062	0.121889	YES
TaCHI5-ZmCHI2	0.0676	0.5051	0.133835	YES
TaCHI7-ZmCHI1	0.0962	0.2836	0.33921	YES
TaCHI11-ZmCHI1	0.0901	0.2326	0.38736	YES
AtCHI1-BoCHI3	0.0956	0.4672	0.204623	YES
AtCHI2-BoCHI2	0.05	0.3785	0.1321	YES
AtCHI2-PtCHI2	0.1566	1.5962	0.098108	YES
AtCHI3-BoCHI4	0.062	1.2987	0.04774	YES
AtCHI3-BoCHI6	0.068	1.1892	0.0571813	YES
AtCHI3-PtCHI3	0.21198	0.81017	0.261649	YES
AtCHI4-BoCHI1	0.0467	0.5163	0.0904513	YES
AtCHI4-BoCHI8	0.0909	0.6032	0.150696	YES
AtCHI5-BoCHI9	0.0302	0.3318	0.0910187	YES
AtCHI5-CsCHI3	0.1612	1.5123	0.106593	YES
CqCHI4-GmCHI5	0.2452	0.9621	0.254859	YES
CqCHI4-PtCHI4	0.1731	2.4582	0.0704174	YES
CqCHI4-SlCHI6	0.2416	1.4199	0.170153	YES
CqCHI7-CsCHI3	0.2134	2.1924	0.0973363	YES
CqCHI7-PtCHI6	0.2099	2.3609	0.0889068	YES
GmCHI1-CsCHI1	0.1906	0.958	0.198956	YES
GmCHI9-CsCHI1	0.1535	0.7629	0.201206	YES
GmCHI6-CsCHI2	0.161	1.1029	0.145979	YES
GmCHI8-CsCHI2	0.161	1.1887	0.135442	YES
GmCHI2-CsCHI3	0.7532	2.0429	0.368692	YES
GmCHI3-CsCHI3	0.2084	2.5167	0.0828069	YES
GmCHI1-PtCHI1	0.2264	1.0553	0.214536	YES
GmCHI2-PtCHI6	0.1974	1.9038	0.103687	YES
GmCHI3-PtCHI6	0.2013	1.6587	0.12136	YES
GmCHI5-SlCHI6	0.2867	1.1462	0.250131	YES
GmCHI6-PtCHI2	0.1171	1.4939	0.0783854	YES
GmCHI7-SlCHI6	0.2804	1.2117	0.23141	YES
GmCHI8-PtCHI2	0.1046	3.0787	0.0339754	YES
GmCHI9-PtCHI1	0.1769	1.0139	0.174475	YES
GmCHI9-SlCHI5	0.1926	1.2564	0.153295	YES
GmCHI12-PtCHI3	0.1718	2.782	0.0617541	YES
PtCHI2-CsCHI2	0.1565	1.2484	0.12536	YES
PtCHI6-CsCHI3	0.0865	2.2697	0.0381108	YES
PtCHI1-SlCHI5	0.2613	1.147	0.227812	YES
PtCHI2-SlCHI7	0.1229	1.3505	0.0910033	YES
PtCHI4-SlCHI6	0.1861	1.0855	0.171442	YES
SlCHI1-CsCHI5	0.2903	2.7117	0.107055	YES
SlCHI7-CsCHI2	0.1478	0.9409	0.157084	YES
