# Supplementary material for: Genome-Wide Classification and Evolutionary Analysis Reveal Diverged Patterns of Chalcone Isomerase in Plants
Source: Biomolecules. 2022 Jul 8;12(7):961. doi: 10.3390/biom12070961 (PMC9313115; doi:10.3390/biom12070961)
Supplement: Supplementary file 1 [file biomolecules-12-00961-s001.zip › Table S7 The detail information and statistical categories on cis-acting elements from 122 CHI genes in 15 green plants.xlsx]

## Sheet: Table S7A
Table S7A.The detail information of cis-acting elements from 122 CHI genes in 15 green plants
Species	mRNA_ID	Gene_ID	GeneName	Type	Orthogroup	moitf	start	end	function
Arabidopsis thaliana	AT1G53520.1	AT1G53520	AtCHI1	III	OG4	TCA-element	23	32	cis-acting element involved in salicylic acid responsiveness
Arabidopsis thaliana	AT1G53520.1	AT1G53520	AtCHI1	III	OG4	TCA-element	317	326	cis-acting element involved in salicylic acid responsiveness
Arabidopsis thaliana	AT1G53520.1	AT1G53520	AtCHI1	III	OG4	TCA-element	1438	1447	cis-acting element involved in salicylic acid responsiveness
Arabidopsis thaliana	AT1G53520.1	AT1G53520	AtCHI1	III	OG4	TCA-element	1832	1841	cis-acting element involved in salicylic acid responsiveness
Arabidopsis thaliana	AT1G53520.1	AT1G53520	AtCHI1	III	OG4	CGTCA-motif	214	219	cis-acting regulatory element involved in the MeJA-responsiveness
Arabidopsis thaliana	AT1G53520.1	AT1G53520	AtCHI1	III	OG4	CGTCA-motif	269	274	cis-acting regulatory element involved in the MeJA-responsiveness
Arabidopsis thaliana	AT1G53520.1	AT1G53520	AtCHI1	III	OG4	CGTCA-motif	444	449	cis-acting regulatory element involved in the MeJA-responsiveness
Arabidopsis thaliana	AT1G53520.1	AT1G53520	AtCHI1	III	OG4	CGTCA-motif	797	802	cis-acting regulatory element involved in the MeJA-responsiveness
Arabidopsis thaliana	AT1G53520.1	AT1G53520	AtCHI1	III	OG4	CGTCA-motif	1477	1482	cis-acting regulatory element involved in the MeJA-responsiveness
Arabidopsis thaliana	AT1G53520.1	AT1G53520	AtCHI1	III	OG4	CGTCA-motif	1830	1835	cis-acting regulatory element involved in the MeJA-responsiveness
Arabidopsis thaliana	AT1G53520.1	AT1G53520	AtCHI1	III	OG4	G-box	445	451	cis-acting regulatory element involved in light responsiveness
Arabidopsis thaliana	AT1G53520.1	AT1G53520	AtCHI1	III	OG4	G-box	1663	1669	cis-acting regulatory element involved in light responsiveness
Arabidopsis thaliana	AT1G53520.1	AT1G53520	AtCHI1	III	OG4	G-box	1670	1676	cis-acting regulatory element involved in light responsiveness
Arabidopsis thaliana	AT1G53520.1	AT1G53520	AtCHI1	III	OG4	ARE	642	648	cis-acting regulatory element essential for the anaerobic induction
Arabidopsis thaliana	AT1G53520.1	AT1G53520	AtCHI1	III	OG4	ARE	1084	1090	cis-acting regulatory element essential for the anaerobic induction
Arabidopsis thaliana	AT1G53520.1	AT1G53520	AtCHI1	III	OG4	ARE	1190	1196	cis-acting regulatory element essential for the anaerobic induction
Arabidopsis thaliana	AT1G53520.1	AT1G53520	AtCHI1	III	OG4	ARE	1220	1226	cis-acting regulatory element essential for the anaerobic induction
Arabidopsis thaliana	AT1G53520.1	AT1G53520	AtCHI1	III	OG4	MRE	1574	1581	MYB binding site involved in light responsiveness
Arabidopsis thaliana	AT1G53520.1	AT1G53520	AtCHI1	III	OG4	MRE	1643	1650	MYB binding site involved in light responsiveness
Arabidopsis thaliana	AT1G53520.1	AT1G53520	AtCHI1	III	OG4	TATC-box	148	155	cis-acting element involved in gibberellin-responsiveness
Arabidopsis thaliana	AT1G53520.1	AT1G53520	AtCHI1	III	OG4	ABRE	446	451	cis-acting element involved in the abscisic acid responsiveness
Arabidopsis thaliana	AT1G53520.1	AT1G53520	AtCHI1	III	OG4	ABRE	1664	1669	cis-acting element involved in the abscisic acid responsiveness
Arabidopsis thaliana	AT1G53520.1	AT1G53520	AtCHI1	III	OG4	AE-box	82	90	part of a module for light response
Arabidopsis thaliana	AT1G53520.1	AT1G53520	AtCHI1	III	OG4	AE-box	979	987	part of a module for light response
Arabidopsis thaliana	AT1G53520.1	AT1G53520	AtCHI1	III	OG4	AE-box	1712	1720	part of a module for light response
Arabidopsis thaliana	AT1G53520.1	AT1G53520	AtCHI1	III	OG4	TCCC-motif	474	481	part of a light responsive element
Arabidopsis thaliana	AT1G53520.1	AT1G53520	AtCHI1	III	OG4	LTR	497	503	cis-acting element involved in low-temperature responsiveness
Arabidopsis thaliana	AT1G53520.1	AT1G53520	AtCHI1	III	OG4	LTR	1036	1042	cis-acting element involved in low-temperature responsiveness
Arabidopsis thaliana	AT1G53520.1	AT1G53520	AtCHI1	III	OG4	MBS	454	460	MYB binding site involved in drought-inducibility
Arabidopsis thaliana	AT1G53520.1	AT1G53520	AtCHI1	III	OG4	MBS	1915	1921	MYB binding site involved in drought-inducibility
Arabidopsis thaliana	AT1G53520.1	AT1G53520	AtCHI1	III	OG4	GT1-motif	814	820	light responsive element
Arabidopsis thaliana	AT1G53520.1	AT1G53520	AtCHI1	III	OG4	GT1-motif	821	827	light responsive element
Arabidopsis thaliana	AT1G53520.1	AT1G53520	AtCHI1	III	OG4	GT1-motif	1951	1957	light responsive element
Arabidopsis thaliana	AT1G53520.1	AT1G53520	AtCHI1	III	OG4	TGA-element	1906	1912	auxin-responsive element
Arabidopsis thaliana	AT1G53520.1	AT1G53520	AtCHI1	III	OG4	TGA-element	1937	1943	auxin-responsive element
Arabidopsis thaliana	AT1G53520.1	AT1G53520	AtCHI1	III	OG4	O2-site	680	689	cis-acting regulatory element involved in zein metabolism regulation
Arabidopsis thaliana	AT1G53520.1	AT1G53520	AtCHI1	III	OG4	O2-site	1092	1101	cis-acting regulatory element involved in zein metabolism regulation
Arabidopsis thaliana	AT1G53520.1	AT1G53520	AtCHI1	III	OG4	TGACG-motif	214	219	cis-acting regulatory element involved in the MeJA-responsiveness
Arabidopsis thaliana	AT1G53520.1	AT1G53520	AtCHI1	III	OG4	TGACG-motif	269	274	cis-acting regulatory element involved in the MeJA-responsiveness
Arabidopsis thaliana	AT1G53520.1	AT1G53520	AtCHI1	III	OG4	TGACG-motif	444	449	cis-acting regulatory element involved in the MeJA-responsiveness
Arabidopsis thaliana	AT1G53520.1	AT1G53520	AtCHI1	III	OG4	TGACG-motif	797	802	cis-acting regulatory element involved in the MeJA-responsiveness
Arabidopsis thaliana	AT1G53520.1	AT1G53520	AtCHI1	III	OG4	TGACG-motif	1477	1482	cis-acting regulatory element involved in the MeJA-responsiveness
Arabidopsis thaliana	AT1G53520.1	AT1G53520	AtCHI1	III	OG4	TGACG-motif	1830	1835	cis-acting regulatory element involved in the MeJA-responsiveness
Arabidopsis thaliana	AT1G53520.1	AT1G53520	AtCHI1	III	OG4	TCT-motif	587	593	part of a light responsive element
Arabidopsis thaliana	AT1G53520.1	AT1G53520	AtCHI1	III	OG4	TCT-motif	1492	1498	part of a light responsive element
Arabidopsis thaliana	AT2G26310.1	AT2G26310	AtCHI2	III	OG2	L-box	1519	1529	part of a light responsive element
Arabidopsis thaliana	AT2G26310.1	AT2G26310	AtCHI2	III	OG2	CAT-box	501	507	cis-acting regulatory element related to meristem expression
Arabidopsis thaliana	AT2G26310.1	AT2G26310	AtCHI2	III	OG2	TCT-motif	1100	1106	part of a light responsive element
Arabidopsis thaliana	AT2G26310.1	AT2G26310	AtCHI2	III	OG2	TCT-motif	1877	1883	part of a light responsive element
Arabidopsis thaliana	AT2G26310.1	AT2G26310	AtCHI2	III	OG2	P-box	78	85	gibberellin-responsive element
Arabidopsis thaliana	AT2G26310.1	AT2G26310	AtCHI2	III	OG2	TGACG-motif	683	688	cis-acting regulatory element involved in the MeJA-responsiveness
Arabidopsis thaliana	AT2G26310.1	AT2G26310	AtCHI2	III	OG2	TGACG-motif	1096	1101	cis-acting regulatory element involved in the MeJA-responsiveness
Arabidopsis thaliana	AT2G26310.1	AT2G26310	AtCHI2	III	OG2	LTR	1605	1611	cis-acting element involved in low-temperature responsiveness
Arabidopsis thaliana	AT2G26310.1	AT2G26310	AtCHI2	III	OG2	LTR	1793	1799	cis-acting element involved in low-temperature responsiveness
Arabidopsis thaliana	AT2G26310.1	AT2G26310	AtCHI2	III	OG2	MBS	235	241	MYB binding site involved in drought-inducibility
Arabidopsis thaliana	AT2G26310.1	AT2G26310	AtCHI2	III	OG2	LAMP-element	1830	1838	part of a light responsive element
Arabidopsis thaliana	AT2G26310.1	AT2G26310	AtCHI2	III	OG2	ABRE	685	690	cis-acting element involved in the abscisic acid responsiveness
Arabidopsis thaliana	AT2G26310.1	AT2G26310	AtCHI2	III	OG2	TGA-box	1096	1104	part of an auxin-responsive element
Arabidopsis thaliana	AT2G26310.1	AT2G26310	AtCHI2	III	OG2	CGTCA-motif	683	688	cis-acting regulatory element involved in the MeJA-responsiveness
Arabidopsis thaliana	AT2G26310.1	AT2G26310	AtCHI2	III	OG2	CGTCA-motif	1096	1101	cis-acting regulatory element involved in the MeJA-responsiveness
Arabidopsis thaliana	AT2G26310.1	AT2G26310	AtCHI2	III	OG2	G-box	243	249	cis-acting regulatory element involved in light responsiveness
Arabidopsis thaliana	AT2G26310.1	AT2G26310	AtCHI2	III	OG2	G-box	341	350	cis-acting regulatory element involved in light responsiveness
Arabidopsis thaliana	AT2G26310.1	AT2G26310	AtCHI2	III	OG2	G-box	684	690	cis-acting regulatory element involved in light responsiveness
Arabidopsis thaliana	AT2G26310.1	AT2G26310	AtCHI2	III	OG2	ATCT-motif	482	491	part of a conserved DNA module involved in light responsiveness
Arabidopsis thaliana	AT3G55120.1	AT3G55120	AtCHI3	I	OG1	ABRE	82	87	cis-acting element involved in the abscisic acid responsiveness
Arabidopsis thaliana	AT3G55120.1	AT3G55120	AtCHI3	I	OG1	ARE	872	878	cis-acting regulatory element essential for the anaerobic induction
Arabidopsis thaliana	AT3G55120.1	AT3G55120	AtCHI3	I	OG1	ARE	961	967	cis-acting regulatory element essential for the anaerobic induction
Arabidopsis thaliana	AT3G55120.1	AT3G55120	AtCHI3	I	OG1	ARE	1342	1348	cis-acting regulatory element essential for the anaerobic induction
Arabidopsis thaliana	AT3G55120.1	AT3G55120	AtCHI3	I	OG1	ARE	1495	1501	cis-acting regulatory element essential for the anaerobic induction
Arabidopsis thaliana	AT3G55120.1	AT3G55120	AtCHI3	I	OG1	TCA-element	164	173	cis-acting element involved in salicylic acid responsiveness
Arabidopsis thaliana	AT3G55120.1	AT3G55120	AtCHI3	I	OG1	TCA-element	524	533	cis-acting element involved in salicylic acid responsiveness
Arabidopsis thaliana	AT3G55120.1	AT3G55120	AtCHI3	I	OG1	RY-element	277	285	cis-acting regulatory element involved in seed-specific regulation
Arabidopsis thaliana	AT3G55120.1	AT3G55120	AtCHI3	I	OG1	TC-rich repeats	560	569	cis-acting element involved in defense and stress responsiveness
Arabidopsis thaliana	AT3G55120.1	AT3G55120	AtCHI3	I	OG1	TC-rich repeats	1704	1713	cis-acting element involved in defense and stress responsiveness
Arabidopsis thaliana	AT3G55120.1	AT3G55120	AtCHI3	I	OG1	ACA-motif	1337	1349	part of gapA in (gapA-CMA1) involved with light responsiveness
Arabidopsis thaliana	AT3G55120.1	AT3G55120	AtCHI3	I	OG1	TCT-motif	1660	1666	part of a light responsive element
Arabidopsis thaliana	AT3G55120.1	AT3G55120	AtCHI3	I	OG1	TCT-motif	1698	1704	part of a light responsive element
Arabidopsis thaliana	AT3G55120.1	AT3G55120	AtCHI3	I	OG1	circadian	738	747	cis-acting regulatory element involved in circadian control
Arabidopsis thaliana	AT3G55120.1	AT3G55120	AtCHI3	I	OG1	Box 4	193	199	part of a conserved DNA module involved in light responsiveness
Arabidopsis thaliana	AT3G55120.1	AT3G55120	AtCHI3	I	OG1	Box 4	641	647	part of a conserved DNA module involved in light responsiveness
Arabidopsis thaliana	AT3G55120.1	AT3G55120	AtCHI3	I	OG1	Box 4	673	679	part of a conserved DNA module involved in light responsiveness
Arabidopsis thaliana	AT3G55120.1	AT3G55120	AtCHI3	I	OG1	MBS	1762	1768	MYB binding site involved in drought-inducibility
Arabidopsis thaliana	AT3G55120.1	AT3G55120	AtCHI3	I	OG1	LTR	847	853	cis-acting element involved in low-temperature responsiveness
Arabidopsis thaliana	AT3G55120.1	AT3G55120	AtCHI3	I	OG1	LTR	1692	1698	cis-acting element involved in low-temperature responsiveness
Arabidopsis thaliana	AT3G55120.1	AT3G55120	AtCHI3	I	OG1	GCN4_motif	260	267	cis-regulatory element involved in endosperm expression
Arabidopsis thaliana	AT3G55120.1	AT3G55120	AtCHI3	I	OG1	GA-motif	1579	1587	part of a light responsive element
Arabidopsis thaliana	AT3G55120.1	AT3G55120	AtCHI3	I	OG1	G-box	82	88	cis-acting regulatory element involved in light responsiveness
Arabidopsis thaliana	AT3G63170.1	AT3G63170	AtCHI4	III	OG5	ABRE	231	238	cis-acting element involved in the abscisic acid responsiveness
Arabidopsis thaliana	AT3G63170.1	AT3G63170	AtCHI4	III	OG5	ABRE	245	251	cis-acting element involved in the abscisic acid responsiveness
Arabidopsis thaliana	AT3G63170.1	AT3G63170	AtCHI4	III	OG5	ABRE	246	251	cis-acting element involved in the abscisic acid responsiveness
Arabidopsis thaliana	AT3G63170.1	AT3G63170	AtCHI4	III	OG5	ABRE	1153	1162	cis-acting element involved in the abscisic acid responsiveness
Arabidopsis thaliana	AT3G63170.1	AT3G63170	AtCHI4	III	OG5	ABRE	1155	1161	cis-acting element involved in the abscisic acid responsiveness
Arabidopsis thaliana	AT3G63170.1	AT3G63170	AtCHI4	III	OG5	ABRE	1156	1161	cis-acting element involved in the abscisic acid responsiveness
Arabidopsis thaliana	AT3G63170.1	AT3G63170	AtCHI4	III	OG5	ABRE	1539	1544	cis-acting element involved in the abscisic acid responsiveness
Arabidopsis thaliana	AT3G63170.1	AT3G63170	AtCHI4	III	OG5	ABRE	1940	1946	cis-acting element involved in the abscisic acid responsiveness
Arabidopsis thaliana	AT3G63170.1	AT3G63170	AtCHI4	III	OG5	ABRE	1941	1946	cis-acting element involved in the abscisic acid responsiveness
Arabidopsis thaliana	AT3G63170.1	AT3G63170	AtCHI4	III	OG5	ABRE	1951	1957	cis-acting element involved in the abscisic acid responsiveness
Arabidopsis thaliana	AT3G63170.1	AT3G63170	AtCHI4	III	OG5	ABRE	1952	1957	cis-acting element involved in the abscisic acid responsiveness
Arabidopsis thaliana	AT3G63170.1	AT3G63170	AtCHI4	III	OG5	ARE	993	999	cis-acting regulatory element essential for the anaerobic induction
Arabidopsis thaliana	AT3G63170.1	AT3G63170	AtCHI4	III	OG5	ARE	1359	1365	cis-acting regulatory element essential for the anaerobic induction
Arabidopsis thaliana	AT3G63170.1	AT3G63170	AtCHI4	III	OG5	CGTCA-motif	1566	1571	cis-acting regulatory element involved in the MeJA-responsiveness
Arabidopsis thaliana	AT3G63170.1	AT3G63170	AtCHI4	III	OG5	G-box	245	251	cis-acting regulatory element involved in light responsiveness
Arabidopsis thaliana	AT3G63170.1	AT3G63170	AtCHI4	III	OG5	G-box	1154	1162	cis-acting regulatory element involved in light responsiveness
Arabidopsis thaliana	AT3G63170.1	AT3G63170	AtCHI4	III	OG5	G-box	1155	1161	cis-acting regulatory element involved in light responsiveness
Arabidopsis thaliana	AT3G63170.1	AT3G63170	AtCHI4	III	OG5	G-box	1653	1659	cis-acting regulatory element involved in light responsiveness
Arabidopsis thaliana	AT3G63170.1	AT3G63170	AtCHI4	III	OG5	G-box	1940	1946	cis-acting regulatory element involved in light responsiveness
Arabidopsis thaliana	AT3G63170.1	AT3G63170	AtCHI4	III	OG5	G-box	1950	1958	cis-acting regulatory element involved in light responsiveness
Arabidopsis thaliana	AT3G63170.1	AT3G63170	AtCHI4	III	OG5	G-box	1951	1957	cis-acting regulatory element involved in light responsiveness
Arabidopsis thaliana	AT3G63170.1	AT3G63170	AtCHI4	III	OG5	Box II	956	965	part of a light responsive element
Arabidopsis thaliana	AT3G63170.1	AT3G63170	AtCHI4	III	OG5	ACE	1153	1162	cis-acting element involved in light responsiveness
Arabidopsis thaliana	AT3G63170.1	AT3G63170	AtCHI4	III	OG5	TC-rich repeats	1625	1634	cis-acting element involved in defense and stress responsiveness
Arabidopsis thaliana	AT3G63170.1	AT3G63170	AtCHI4	III	OG5	TCT-motif	1629	1635	part of a light responsive element
Arabidopsis thaliana	AT3G63170.1	AT3G63170	AtCHI4	III	OG5	TGACG-motif	1566	1571	cis-acting regulatory element involved in the MeJA-responsiveness
Arabidopsis thaliana	AT3G63170.1	AT3G63170	AtCHI4	III	OG5	3-AF1 binding site	129	139	light responsive element
Arabidopsis thaliana	AT3G63170.1	AT3G63170	AtCHI4	III	OG5	LTR	158	164	cis-acting element involved in low-temperature responsiveness
Arabidopsis thaliana	AT3G63170.1	AT3G63170	AtCHI4	III	OG5	GC-motif	1212	1218	enhancer-like element involved in anoxic specific inducibility
Arabidopsis thaliana	AT3G63170.1	AT3G63170	AtCHI4	III	OG5	GC-motif	1836	1842	enhancer-like element involved in anoxic specific inducibility
Arabidopsis thaliana	AT3G63170.1	AT3G63170	AtCHI4	III	OG5	GCN4_motif	917	924	cis-regulatory element involved in endosperm expression
Arabidopsis thaliana	AT3G63170.1	AT3G63170	AtCHI4	III	OG5	TGA-element	388	394	auxin-responsive element
Arabidopsis thaliana	AT3G63170.1	AT3G63170	AtCHI4	III	OG5	TGA-element	629	635	auxin-responsive element
Arabidopsis thaliana	AT3G63170.1	AT3G63170	AtCHI4	III	OG5	AE-box	855	863	part of a module for light response
Arabidopsis thaliana	AT3G63170.1	AT3G63170	AtCHI4	III	OG5	G-box	245	251	cis-acting regulatory element involved in light responsiveness
Arabidopsis thaliana	AT3G63170.1	AT3G63170	AtCHI4	III	OG5	G-box	1155	1161	cis-acting regulatory element involved in light responsiveness
Arabidopsis thaliana	AT3G63170.1	AT3G63170	AtCHI4	III	OG5	G-box	1539	1545	cis-acting regulatory element involved in light responsiveness
Arabidopsis thaliana	AT3G63170.1	AT3G63170	AtCHI4	III	OG5	G-box	1940	1946	cis-acting regulatory element involved in light responsiveness
Arabidopsis thaliana	AT3G63170.1	AT3G63170	AtCHI4	III	OG5	G-box	1951	1957	cis-acting regulatory element involved in light responsiveness
Arabidopsis thaliana	AT5G05270.1	AT5G05270	AtCHI5	IV	OG3	TC-rich repeats	1264	1273	cis-acting element involved in defense and stress responsiveness
Arabidopsis thaliana	AT5G05270.1	AT5G05270	AtCHI5	IV	OG3	ACE	838	847	cis-acting element involved in light responsiveness
Arabidopsis thaliana	AT5G05270.1	AT5G05270	AtCHI5	IV	OG3	G-box	58	64	cis-acting regulatory element involved in light responsiveness
Arabidopsis thaliana	AT5G05270.1	AT5G05270	AtCHI5	IV	OG3	G-box	235	241	cis-acting regulatory element involved in light responsiveness
Arabidopsis thaliana	AT5G05270.1	AT5G05270	AtCHI5	IV	OG3	G-box	1171	1177	cis-acting regulatory element involved in light responsiveness
Arabidopsis thaliana	AT5G05270.1	AT5G05270	AtCHI5	IV	OG3	G-box	1933	1942	cis-acting regulatory element involved in light responsiveness
Arabidopsis thaliana	AT5G05270.1	AT5G05270	AtCHI5	IV	OG3	G-box	1934	1940	cis-acting regulatory element involved in light responsiveness
Arabidopsis thaliana	AT5G05270.1	AT5G05270	AtCHI5	IV	OG3	ATCT-motif	912	921	part of a conserved DNA module involved in light responsiveness
Arabidopsis thaliana	AT5G05270.1	AT5G05270	AtCHI5	IV	OG3	ATCT-motif	1117	1126	part of a conserved DNA module involved in light responsiveness
Arabidopsis thaliana	AT5G05270.1	AT5G05270	AtCHI5	IV	OG3	CGTCA-motif	55	60	cis-acting regulatory element involved in the MeJA-responsiveness
Arabidopsis thaliana	AT5G05270.1	AT5G05270	AtCHI5	IV	OG3	TCA-element	883	892	cis-acting element involved in salicylic acid responsiveness
Arabidopsis thaliana	AT5G05270.1	AT5G05270	AtCHI5	IV	OG3	ARE	411	417	cis-acting regulatory element essential for the anaerobic induction
Arabidopsis thaliana	AT5G05270.1	AT5G05270	AtCHI5	IV	OG3	ARE	809	815	cis-acting regulatory element essential for the anaerobic induction
Arabidopsis thaliana	AT5G05270.1	AT5G05270	AtCHI5	IV	OG3	ABRE	58	64	cis-acting element involved in the abscisic acid responsiveness
Arabidopsis thaliana	AT5G05270.1	AT5G05270	AtCHI5	IV	OG3	ABRE	59	64	cis-acting element involved in the abscisic acid responsiveness
Arabidopsis thaliana	AT5G05270.1	AT5G05270	AtCHI5	IV	OG3	ABRE	235	241	cis-acting element involved in the abscisic acid responsiveness
Arabidopsis thaliana	AT5G05270.1	AT5G05270	AtCHI5	IV	OG3	ABRE	236	241	cis-acting element involved in the abscisic acid responsiveness
Arabidopsis thaliana	AT5G05270.1	AT5G05270	AtCHI5	IV	OG3	ABRE	1030	1035	cis-acting element involved in the abscisic acid responsiveness
Arabidopsis thaliana	AT5G05270.1	AT5G05270	AtCHI5	IV	OG3	ABRE	1932	1941	cis-acting element involved in the abscisic acid responsiveness
Arabidopsis thaliana	AT5G05270.1	AT5G05270	AtCHI5	IV	OG3	ABRE	1934	1940	cis-acting element involved in the abscisic acid responsiveness
Arabidopsis thaliana	AT5G05270.1	AT5G05270	AtCHI5	IV	OG3	ABRE	1935	1940	cis-acting element involved in the abscisic acid responsiveness
Arabidopsis thaliana	AT5G05270.1	AT5G05270	AtCHI5	IV	OG3	G-box	58	64	cis-acting regulatory element involved in light responsiveness
Arabidopsis thaliana	AT5G05270.1	AT5G05270	AtCHI5	IV	OG3	G-box	235	241	cis-acting regulatory element involved in light responsiveness
Arabidopsis thaliana	AT5G05270.1	AT5G05270	AtCHI5	IV	OG3	G-box	1030	1036	cis-acting regulatory element involved in light responsiveness
Arabidopsis thaliana	AT5G05270.1	AT5G05270	AtCHI5	IV	OG3	G-box	1934	1940	cis-acting regulatory element involved in light responsiveness
Arabidopsis thaliana	AT5G05270.1	AT5G05270	AtCHI5	IV	OG3	TCCC-motif	376	383	part of a light responsive element
Arabidopsis thaliana	AT5G05270.1	AT5G05270	AtCHI5	IV	OG3	GA-motif	554	562	part of a light responsive element
Arabidopsis thaliana	AT5G05270.1	AT5G05270	AtCHI5	IV	OG3	MBS	1339	1345	MYB binding site involved in drought-inducibility
Arabidopsis thaliana	AT5G05270.1	AT5G05270	AtCHI5	IV	OG3	LTR	364	370	cis-acting element involved in low-temperature responsiveness
Arabidopsis thaliana	AT5G05270.1	AT5G05270	AtCHI5	IV	OG3	TGACG-motif	55	60	cis-acting regulatory element involved in the MeJA-responsiveness
Arabidopsis thaliana	AT5G05270.1	AT5G05270	AtCHI5	IV	OG3	Box 4	1194	1200	part of a conserved DNA module involved in light responsiveness
Arabidopsis thaliana	AT5G05270.1	AT5G05270	AtCHI5	IV	OG3	P-box	1158	1165	gibberellin-responsive element
Arabidopsis thaliana	AT5G05270.1	AT5G05270	AtCHI5	IV	OG3	TCT-motif	693	699	part of a light responsive element
Arabidopsis thaliana	AT5G05270.1	AT5G05270	AtCHI5	IV	OG3	CAT-box	169	175	cis-acting regulatory element related to meristem expression
Arabidopsis thaliana	AT5G05270.1	AT5G05270	AtCHI5	IV	OG3	GATA-motif	721	730	part of a light responsive element
Arabidopsis thaliana	AT5G05270.1	AT5G05270	AtCHI5	IV	OG3	GATA-motif	953	962	part of a light responsive element
Arabidopsis thaliana	AT5G66220.1	AT5G66220	AtCHI7	I	OG1	3-AF1 binding site	332	342	light responsive element
Arabidopsis thaliana	AT5G66220.1	AT5G66220	AtCHI7	I	OG1	TGACG-motif	1077	1082	cis-acting regulatory element involved in the MeJA-responsiveness
Arabidopsis thaliana	AT5G66220.1	AT5G66220	AtCHI7	I	OG1	TGACG-motif	1264	1269	cis-acting regulatory element involved in the MeJA-responsiveness
Arabidopsis thaliana	AT5G66220.1	AT5G66220	AtCHI7	I	OG1	Box 4	296	302	part of a conserved DNA module involved in light responsiveness
Arabidopsis thaliana	AT5G66220.1	AT5G66220	AtCHI7	I	OG1	Box 4	1924	1930	part of a conserved DNA module involved in light responsiveness
Arabidopsis thaliana	AT5G66220.1	AT5G66220	AtCHI7	I	OG1	ATC-motif	860	868	part of a conserved DNA module involved in light responsiveness
Arabidopsis thaliana	AT5G66220.1	AT5G66220	AtCHI7	I	OG1	TCT-motif	661	667	part of a light responsive element
Arabidopsis thaliana	AT5G66220.1	AT5G66220	AtCHI7	I	OG1	GATA-motif	1825	1832	part of a light responsive element
Arabidopsis thaliana	AT5G66220.1	AT5G66220	AtCHI7	I	OG1	CAT-box	712	718	cis-acting regulatory element related to meristem expression
Arabidopsis thaliana	AT5G66220.1	AT5G66220	AtCHI7	I	OG1	AACA_motif	757	769	involved in endosperm-specific negative expression
Arabidopsis thaliana	AT5G66220.1	AT5G66220	AtCHI7	I	OG1	G-box	1099	1105	cis-acting regulatory element involved in light responsiveness
Arabidopsis thaliana	AT5G66220.1	AT5G66220	AtCHI7	I	OG1	G-box	1339	1345	cis-acting regulatory element involved in light responsiveness
Arabidopsis thaliana	AT5G66220.1	AT5G66220	AtCHI7	I	OG1	GC-motif	655	661	enhancer-like element involved in anoxic specific inducibility
Arabidopsis thaliana	AT5G66220.1	AT5G66220	AtCHI7	I	OG1	GT1-motif	868	874	light responsive element
Arabidopsis thaliana	AT5G66220.1	AT5G66220	AtCHI7	I	OG1	ARE	1244	1250	cis-acting regulatory element essential for the anaerobic induction
Arabidopsis thaliana	AT5G66220.1	AT5G66220	AtCHI7	I	OG1	ABRE	1099	1105	cis-acting element involved in the abscisic acid responsiveness
Arabidopsis thaliana	AT5G66220.1	AT5G66220	AtCHI7	I	OG1	ABRE	1100	1105	cis-acting element involved in the abscisic acid responsiveness
Arabidopsis thaliana	AT5G66220.1	AT5G66220	AtCHI7	I	OG1	ABRE	1340	1345	cis-acting element involved in the abscisic acid responsiveness
Arabidopsis thaliana	AT5G66220.1	AT5G66220	AtCHI7	I	OG1	AuxRR-core	1934	1941	cis-acting regulatory element involved in auxin responsiveness
Arabidopsis thaliana	AT5G66220.1	AT5G66220	AtCHI7	I	OG1	ACE	1383	1393	cis-acting element involved in light responsiveness
Arabidopsis thaliana	AT5G66220.1	AT5G66220	AtCHI7	I	OG1	RY-element	1554	1562	cis-acting regulatory element involved in seed-specific regulation
Arabidopsis thaliana	AT5G66220.1	AT5G66220	AtCHI7	I	OG1	G-box	1099	1105	cis-acting regulatory element involved in light responsiveness
Arabidopsis thaliana	AT5G66220.1	AT5G66220	AtCHI7	I	OG1	CGTCA-motif	1077	1082	cis-acting regulatory element involved in the MeJA-responsiveness
Arabidopsis thaliana	AT5G66220.1	AT5G66220	AtCHI7	I	OG1	CGTCA-motif	1264	1269	cis-acting regulatory element involved in the MeJA-responsiveness
Arabidopsis thaliana	AT5G66230.2	AT5G66230	AtCHI6	I	OG1	3-AF1 binding site	357	367	light responsive element
Arabidopsis thaliana	AT5G66230.2	AT5G66230	AtCHI6	I	OG1	Box 4	321	327	part of a conserved DNA module involved in light responsiveness
Arabidopsis thaliana	AT5G66230.2	AT5G66230	AtCHI6	I	OG1	Box 4	1949	1955	part of a conserved DNA module involved in light responsiveness
Arabidopsis thaliana	AT5G66230.2	AT5G66230	AtCHI6	I	OG1	TGACG-motif	13	18	cis-acting regulatory element involved in the MeJA-responsiveness
Arabidopsis thaliana	AT5G66230.2	AT5G66230	AtCHI6	I	OG1	TGACG-motif	1102	1107	cis-acting regulatory element involved in the MeJA-responsiveness
Arabidopsis thaliana	AT5G66230.2	AT5G66230	AtCHI6	I	OG1	TGACG-motif	1289	1294	cis-acting regulatory element involved in the MeJA-responsiveness
Arabidopsis thaliana	AT5G66230.2	AT5G66230	AtCHI6	I	OG1	TCT-motif	686	692	part of a light responsive element
Arabidopsis thaliana	AT5G66230.2	AT5G66230	AtCHI6	I	OG1	ATC-motif	885	893	part of a conserved DNA module involved in light responsiveness
Arabidopsis thaliana	AT5G66230.2	AT5G66230	AtCHI6	I	OG1	AACA_motif	782	794	involved in endosperm-specific negative expression
Arabidopsis thaliana	AT5G66230.2	AT5G66230	AtCHI6	I	OG1	CAT-box	737	743	cis-acting regulatory element related to meristem expression
Arabidopsis thaliana	AT5G66230.2	AT5G66230	AtCHI6	I	OG1	GATA-motif	1850	1857	part of a light responsive element
Arabidopsis thaliana	AT5G66230.2	AT5G66230	AtCHI6	I	OG1	G-box	1124	1130	cis-acting regulatory element involved in light responsiveness
Arabidopsis thaliana	AT5G66230.2	AT5G66230	AtCHI6	I	OG1	G-box	1364	1370	cis-acting regulatory element involved in light responsiveness
Arabidopsis thaliana	AT5G66230.2	AT5G66230	AtCHI6	I	OG1	GC-motif	680	686	enhancer-like element involved in anoxic specific inducibility
Arabidopsis thaliana	AT5G66230.2	AT5G66230	AtCHI6	I	OG1	GT1-motif	893	899	light responsive element
Arabidopsis thaliana	AT5G66230.2	AT5G66230	AtCHI6	I	OG1	ARE	1269	1275	cis-acting regulatory element essential for the anaerobic induction
Arabidopsis thaliana	AT5G66230.2	AT5G66230	AtCHI6	I	OG1	ABRE	1124	1130	cis-acting element involved in the abscisic acid responsiveness
Arabidopsis thaliana	AT5G66230.2	AT5G66230	AtCHI6	I	OG1	ABRE	1125	1130	cis-acting element involved in the abscisic acid responsiveness
Arabidopsis thaliana	AT5G66230.2	AT5G66230	AtCHI6	I	OG1	ABRE	1365	1370	cis-acting element involved in the abscisic acid responsiveness
Arabidopsis thaliana	AT5G66230.2	AT5G66230	AtCHI6	I	OG1	AuxRR-core	1959	1966	cis-acting regulatory element involved in auxin responsiveness
Arabidopsis thaliana	AT5G66230.2	AT5G66230	AtCHI6	I	OG1	RY-element	1579	1587	cis-acting regulatory element involved in seed-specific regulation
Arabidopsis thaliana	AT5G66230.2	AT5G66230	AtCHI6	I	OG1	ACE	1408	1418	cis-acting element involved in light responsiveness
Arabidopsis thaliana	AT5G66230.2	AT5G66230	AtCHI6	I	OG1	G-box	1124	1130	cis-acting regulatory element involved in light responsiveness
Arabidopsis thaliana	AT5G66230.2	AT5G66230	AtCHI6	I	OG1	CGTCA-motif	13	18	cis-acting regulatory element involved in the MeJA-responsiveness
Arabidopsis thaliana	AT5G66230.2	AT5G66230	AtCHI6	I	OG1	CGTCA-motif	1102	1107	cis-acting regulatory element involved in the MeJA-responsiveness
Arabidopsis thaliana	AT5G66230.2	AT5G66230	AtCHI6	I	OG1	CGTCA-motif	1289	1294	cis-acting regulatory element involved in the MeJA-responsiveness
Chenopodium quinoa	AUR62019681-RA	AUR62019681	CqCHI4	III	OG4	ABRE	895	900	cis-acting element involved in the abscisic acid responsiveness
Chenopodium quinoa	AUR62019681-RA	AUR62019681	CqCHI4	III	OG4	ABRE	1667	1673	cis-acting element involved in the abscisic acid responsiveness
Chenopodium quinoa	AUR62019681-RA	AUR62019681	CqCHI4	III	OG4	ABRE	1668	1673	cis-acting element involved in the abscisic acid responsiveness
Chenopodium quinoa	AUR62019681-RA	AUR62019681	CqCHI4	III	OG4	ARE	225	231	cis-acting regulatory element essential for the anaerobic induction
Chenopodium quinoa	AUR62019681-RA	AUR62019681	CqCHI4	III	OG4	ARE	1293	1299	cis-acting regulatory element essential for the anaerobic induction
Chenopodium quinoa	AUR62019681-RA	AUR62019681	CqCHI4	III	OG4	ARE	1985	1991	cis-acting regulatory element essential for the anaerobic induction
Chenopodium quinoa	AUR62019681-RA	AUR62019681	CqCHI4	III	OG4	CGTCA-motif	278	283	cis-acting regulatory element involved in the MeJA-responsiveness
Chenopodium quinoa	AUR62019681-RA	AUR62019681	CqCHI4	III	OG4	CGTCA-motif	523	528	cis-acting regulatory element involved in the MeJA-responsiveness
Chenopodium quinoa	AUR62019681-RA	AUR62019681	CqCHI4	III	OG4	CGTCA-motif	723	728	cis-acting regulatory element involved in the MeJA-responsiveness
Chenopodium quinoa	AUR62019681-RA	AUR62019681	CqCHI4	III	OG4	TCA-element	495	504	cis-acting element involved in salicylic acid responsiveness
Chenopodium quinoa	AUR62019681-RA	AUR62019681	CqCHI4	III	OG4	G-box	894	900	cis-acting regulatory element involved in light responsiveness
Chenopodium quinoa	AUR62019681-RA	AUR62019681	CqCHI4	III	OG4	G-box	1667	1673	cis-acting regulatory element involved in light responsiveness
Chenopodium quinoa	AUR62019681-RA	AUR62019681	CqCHI4	III	OG4	ATCT-motif	1451	1460	part of a conserved DNA module involved in light responsiveness
Chenopodium quinoa	AUR62019681-RA	AUR62019681	CqCHI4	III	OG4	CAG-motif	320	330	part of a light response element
Chenopodium quinoa	AUR62019681-RA	AUR62019681	CqCHI4	III	OG4	GATA-motif	1483	1492	part of a light responsive element
Chenopodium quinoa	AUR62019681-RA	AUR62019681	CqCHI4	III	OG4	CAT-box	161	167	cis-acting regulatory element related to meristem expression
Chenopodium quinoa	AUR62019681-RA	AUR62019681	CqCHI4	III	OG4	L-box	420	429	part of a light responsive element
Chenopodium quinoa	AUR62019681-RA	AUR62019681	CqCHI4	III	OG4	P-box	1786	1793	gibberellin-responsive element
Chenopodium quinoa	AUR62019681-RA	AUR62019681	CqCHI4	III	OG4	TCT-motif	1421	1427	part of a light responsive element
Chenopodium quinoa	AUR62019681-RA	AUR62019681	CqCHI4	III	OG4	circadian	1830	1839	cis-acting regulatory element involved in circadian control
Chenopodium quinoa	AUR62019681-RA	AUR62019681	CqCHI4	III	OG4	TGACG-motif	278	283	cis-acting regulatory element involved in the MeJA-responsiveness
Chenopodium quinoa	AUR62019681-RA	AUR62019681	CqCHI4	III	OG4	TGACG-motif	523	528	cis-acting regulatory element involved in the MeJA-responsiveness
Chenopodium quinoa	AUR62019681-RA	AUR62019681	CqCHI4	III	OG4	TGACG-motif	723	728	cis-acting regulatory element involved in the MeJA-responsiveness
Chenopodium quinoa	AUR62019681-RA	AUR62019681	CqCHI4	III	OG4	Box 4	441	447	part of a conserved DNA module involved in light responsiveness
Chenopodium quinoa	AUR62019681-RA	AUR62019681	CqCHI4	III	OG4	Box 4	471	477	part of a conserved DNA module involved in light responsiveness
Chenopodium quinoa	AUR62019681-RA	AUR62019681	CqCHI4	III	OG4	Box 4	803	809	part of a conserved DNA module involved in light responsiveness
Chenopodium quinoa	AUR62019681-RA	AUR62019681	CqCHI4	III	OG4	Box 4	1412	1418	part of a conserved DNA module involved in light responsiveness
Chenopodium quinoa	AUR62019681-RA	AUR62019681	CqCHI4	III	OG4	Box 4	1712	1718	part of a conserved DNA module involved in light responsiveness
Chenopodium quinoa	AUR62019681-RA	AUR62019681	CqCHI4	III	OG4	Box 4	1827	1833	part of a conserved DNA module involved in light responsiveness
Chenopodium quinoa	AUR62019681-RA	AUR62019681	CqCHI4	III	OG4	GT1-motif	424	430	light responsive element
Chenopodium quinoa	AUR62019681-RA	AUR62019681	CqCHI4	III	OG4	LTR	997	1003	cis-acting element involved in low-temperature responsiveness
Chenopodium quinoa	AUR62019681-RA	AUR62019681	CqCHI4	III	OG4	LTR	1078	1084	cis-acting element involved in low-temperature responsiveness
Chenopodium quinoa	AUR62019681-RA	AUR62019681	CqCHI4	III	OG4	GC-motif	879	885	enhancer-like element involved in anoxic specific inducibility
Chenopodium quinoa	AUR62019681-RA	AUR62019681	CqCHI4	III	OG4	TCCC-motif	1565	1572	part of a light responsive element
Chenopodium quinoa	AUR62019681-RA	AUR62019681	CqCHI4	III	OG4	G-box	1667	1673	cis-acting regulatory element involved in light responsiveness
Chenopodium quinoa	AUR62020283-RA	AUR62020283	CqCHI1	III	OG2	TC-rich repeats	1474	1483	cis-acting element involved in defense and stress responsiveness
Chenopodium quinoa	AUR62020283-RA	AUR62020283	CqCHI1	III	OG2	G-box	894	900	cis-acting regulatory element involved in light responsiveness
Chenopodium quinoa	AUR62020283-RA	AUR62020283	CqCHI1	III	OG2	ARE	113	119	cis-acting regulatory element essential for the anaerobic induction
Chenopodium quinoa	AUR62020283-RA	AUR62020283	CqCHI1	III	OG2	MRE	1285	1292	MYB binding site involved in light responsiveness
Chenopodium quinoa	AUR62020283-RA	AUR62020283	CqCHI1	III	OG2	MRE	1322	1329	MYB binding site involved in light responsiveness
Chenopodium quinoa	AUR62020283-RA	AUR62020283	CqCHI1	III	OG2	MRE	1637	1644	MYB binding site involved in light responsiveness
Chenopodium quinoa	AUR62020283-RA	AUR62020283	CqCHI1	III	OG2	ABRE	648	657	cis-acting element involved in the abscisic acid responsiveness
Chenopodium quinoa	AUR62020283-RA	AUR62020283	CqCHI1	III	OG2	ABRE	892	901	cis-acting element involved in the abscisic acid responsiveness
Chenopodium quinoa	AUR62020283-RA	AUR62020283	CqCHI1	III	OG2	ABRE	894	899	cis-acting element involved in the abscisic acid responsiveness
Chenopodium quinoa	AUR62020283-RA	AUR62020283	CqCHI1	III	OG2	ABRE	1054	1059	cis-acting element involved in the abscisic acid responsiveness
Chenopodium quinoa	AUR62020283-RA	AUR62020283	CqCHI1	III	OG2	TCCC-motif	752	759	part of a light responsive element
Chenopodium quinoa	AUR62020283-RA	AUR62020283	CqCHI1	III	OG2	G-box	1054	1060	cis-acting regulatory element involved in light responsiveness
Chenopodium quinoa	AUR62020283-RA	AUR62020283	CqCHI1	III	OG2	TGA-element	685	691	auxin-responsive element
Chenopodium quinoa	AUR62020283-RA	AUR62020283	CqCHI1	III	OG2	LTR	195	201	cis-acting element involved in low-temperature responsiveness
Chenopodium quinoa	AUR62020283-RA	AUR62020283	CqCHI1	III	OG2	MBS	165	171	MYB binding site involved in drought-inducibility
Chenopodium quinoa	AUR62020283-RA	AUR62020283	CqCHI1	III	OG2	Box 4	592	598	part of a conserved DNA module involved in light responsiveness
Chenopodium quinoa	AUR62020283-RA	AUR62020283	CqCHI1	III	OG2	Box 4	1369	1375	part of a conserved DNA module involved in light responsiveness
Chenopodium quinoa	AUR62020283-RA	AUR62020283	CqCHI1	III	OG2	Box 4	1589	1595	part of a conserved DNA module involved in light responsiveness
Chenopodium quinoa	AUR62020283-RA	AUR62020283	CqCHI1	III	OG2	TCT-motif	1091	1097	part of a light responsive element
Chenopodium quinoa	AUR62020283-RA	AUR62020283	CqCHI1	III	OG2	P-box	328	335	gibberellin-responsive element
Chenopodium quinoa	AUR62020283-RA	AUR62020283	CqCHI1	III	OG2	L-box	47	56	part of a light responsive element
Chenopodium quinoa	AUR62020546-RA	AUR62020546	CqCHI2	I	OG1	L-box	1708	1717	part of a light responsive element
Chenopodium quinoa	AUR62020546-RA	AUR62020546	CqCHI2	I	OG1	GATA-motif	1708	1717	part of a light responsive element
Chenopodium quinoa	AUR62020546-RA	AUR62020546	CqCHI2	I	OG1	Box 4	461	467	part of a conserved DNA module involved in light responsiveness
Chenopodium quinoa	AUR62020546-RA	AUR62020546	CqCHI2	I	OG1	Box 4	605	611	part of a conserved DNA module involved in light responsiveness
Chenopodium quinoa	AUR62020546-RA	AUR62020546	CqCHI2	I	OG1	Box 4	737	743	part of a conserved DNA module involved in light responsiveness
Chenopodium quinoa	AUR62020546-RA	AUR62020546	CqCHI2	I	OG1	Box 4	1356	1362	part of a conserved DNA module involved in light responsiveness
Chenopodium quinoa	AUR62020546-RA	AUR62020546	CqCHI2	I	OG1	Box 4	1692	1698	part of a conserved DNA module involved in light responsiveness
Chenopodium quinoa	AUR62020546-RA	AUR62020546	CqCHI2	I	OG1	Box 4	1870	1876	part of a conserved DNA module involved in light responsiveness
Chenopodium quinoa	AUR62020546-RA	AUR62020546	CqCHI2	I	OG1	circadian	1846	1855	cis-acting regulatory element involved in circadian control
Chenopodium quinoa	AUR62020546-RA	AUR62020546	CqCHI2	I	OG1	TGACG-motif	222	227	cis-acting regulatory element involved in the MeJA-responsiveness
Chenopodium quinoa	AUR62020546-RA	AUR62020546	CqCHI2	I	OG1	TGACG-motif	1638	1643	cis-acting regulatory element involved in the MeJA-responsiveness
Chenopodium quinoa	AUR62020546-RA	AUR62020546	CqCHI2	I	OG1	GT1-motif	1579	1585	light responsive element
Chenopodium quinoa	AUR62020546-RA	AUR62020546	CqCHI2	I	OG1	TGA-element	1841	1847	auxin-responsive element
Chenopodium quinoa	AUR62020546-RA	AUR62020546	CqCHI2	I	OG1	AE-box	1361	1369	part of a module for light response
Chenopodium quinoa	AUR62020546-RA	AUR62020546	CqCHI2	I	OG1	ABRE	111	118	cis-acting element involved in the abscisic acid responsiveness
Chenopodium quinoa	AUR62020546-RA	AUR62020546	CqCHI2	I	OG1	ARE	50	56	cis-acting regulatory element essential for the anaerobic induction
Chenopodium quinoa	AUR62020546-RA	AUR62020546	CqCHI2	I	OG1	ARE	632	638	cis-acting regulatory element essential for the anaerobic induction
Chenopodium quinoa	AUR62020546-RA	AUR62020546	CqCHI2	I	OG1	MRE	1261	1268	MYB binding site involved in light responsiveness
Chenopodium quinoa	AUR62020546-RA	AUR62020546	CqCHI2	I	OG1	TCA-element	1322	1331	cis-acting element involved in salicylic acid responsiveness
Chenopodium quinoa	AUR62020546-RA	AUR62020546	CqCHI2	I	OG1	CGTCA-motif	222	227	cis-acting regulatory element involved in the MeJA-responsiveness
Chenopodium quinoa	AUR62020546-RA	AUR62020546	CqCHI2	I	OG1	CGTCA-motif	1638	1643	cis-acting regulatory element involved in the MeJA-responsiveness
Chenopodium quinoa	AUR62020547-RA	AUR62020547	CqCHI3	I	OG1	TCA-element	463	472	cis-acting element involved in salicylic acid responsiveness
Chenopodium quinoa	AUR62020547-RA	AUR62020547	CqCHI3	I	OG1	G-box	1332	1338	cis-acting regulatory element involved in light responsiveness
Chenopodium quinoa	AUR62020547-RA	AUR62020547	CqCHI3	I	OG1	ATCT-motif	1849	1858	part of a conserved DNA module involved in light responsiveness
Chenopodium quinoa	AUR62020547-RA	AUR62020547	CqCHI3	I	OG1	ARE	1495	1501	cis-acting regulatory element essential for the anaerobic induction
Chenopodium quinoa	AUR62020547-RA	AUR62020547	CqCHI3	I	OG1	ABRE	871	876	cis-acting element involved in the abscisic acid responsiveness
Chenopodium quinoa	AUR62020547-RA	AUR62020547	CqCHI3	I	OG1	ABRE	1333	1338	cis-acting element involved in the abscisic acid responsiveness
Chenopodium quinoa	AUR62020547-RA	AUR62020547	CqCHI3	I	OG1	G-box	871	877	cis-acting regulatory element involved in light responsiveness
Chenopodium quinoa	AUR62020547-RA	AUR62020547	CqCHI3	I	OG1	MBS	1071	1077	MYB binding site involved in drought-inducibility
Chenopodium quinoa	AUR62020547-RA	AUR62020547	CqCHI3	I	OG1	GT1-motif	362	368	light responsive element
Chenopodium quinoa	AUR62020547-RA	AUR62020547	CqCHI3	I	OG1	GC-motif	690	696	enhancer-like element involved in anoxic specific inducibility
Chenopodium quinoa	AUR62020547-RA	AUR62020547	CqCHI3	I	OG1	O2-site	874	883	cis-acting regulatory element involved in zein metabolism regulation
Chenopodium quinoa	AUR62020547-RA	AUR62020547	CqCHI3	I	OG1	LAMP-element	1535	1543	part of a light responsive element
Chenopodium quinoa	AUR62020547-RA	AUR62020547	CqCHI3	I	OG1	Box 4	1268	1274	part of a conserved DNA module involved in light responsiveness
Chenopodium quinoa	AUR62020547-RA	AUR62020547	CqCHI3	I	OG1	Box 4	1711	1717	part of a conserved DNA module involved in light responsiveness
Chenopodium quinoa	AUR62020547-RA	AUR62020547	CqCHI3	I	OG1	circadian	218	227	cis-acting regulatory element involved in circadian control
Chenopodium quinoa	AUR62020547-RA	AUR62020547	CqCHI3	I	OG1	TCT-motif	728	734	part of a light responsive element
Chenopodium quinoa	AUR62020547-RA	AUR62020547	CqCHI3	I	OG1	TCT-motif	994	1000	part of a light responsive element
Chenopodium quinoa	AUR62027261-RA	AUR62027261	CqCHI5	I	OG1	ABRE	12	17	cis-acting element involved in the abscisic acid responsiveness
Chenopodium quinoa	AUR62027261-RA	AUR62027261	CqCHI5	I	OG1	Sp1	195	201	light responsive element
Chenopodium quinoa	AUR62027261-RA	AUR62027261	CqCHI5	I	OG1	Sp1	294	300	light responsive element
Chenopodium quinoa	AUR62027261-RA	AUR62027261	CqCHI5	I	OG1	MRE	1285	1292	MYB binding site involved in light responsiveness
Chenopodium quinoa	AUR62027261-RA	AUR62027261	CqCHI5	I	OG1	ARE	906	912	cis-acting regulatory element essential for the anaerobic induction
Chenopodium quinoa	AUR62027261-RA	AUR62027261	CqCHI5	I	OG1	ARE	1620	1626	cis-acting regulatory element essential for the anaerobic induction
Chenopodium quinoa	AUR62027261-RA	AUR62027261	CqCHI5	I	OG1	ARE	1988	1994	cis-acting regulatory element essential for the anaerobic induction
Chenopodium quinoa	AUR62027261-RA	AUR62027261	CqCHI5	I	OG1	G-box	11	17	cis-acting regulatory element involved in light responsiveness
Chenopodium quinoa	AUR62027261-RA	AUR62027261	CqCHI5	I	OG1	CGTCA-motif	961	966	cis-acting regulatory element involved in the MeJA-responsiveness
Chenopodium quinoa	AUR62027261-RA	AUR62027261	CqCHI5	I	OG1	CGTCA-motif	1127	1132	cis-acting regulatory element involved in the MeJA-responsiveness
Chenopodium quinoa	AUR62027261-RA	AUR62027261	CqCHI5	I	OG1	CGTCA-motif	1148	1153	cis-acting regulatory element involved in the MeJA-responsiveness
Chenopodium quinoa	AUR62027261-RA	AUR62027261	CqCHI5	I	OG1	CGTCA-motif	1176	1181	cis-acting regulatory element involved in the MeJA-responsiveness
Chenopodium quinoa	AUR62027261-RA	AUR62027261	CqCHI5	I	OG1	TCT-motif	1837	1843	part of a light responsive element
Chenopodium quinoa	AUR62027261-RA	AUR62027261	CqCHI5	I	OG1	GATA-motif	1834	1844	part of a light responsive element
Chenopodium quinoa	AUR62027261-RA	AUR62027261	CqCHI5	I	OG1	3-AF1 binding site	170	180	light responsive element
Chenopodium quinoa	AUR62027261-RA	AUR62027261	CqCHI5	I	OG1	TGACG-motif	961	966	cis-acting regulatory element involved in the MeJA-responsiveness
Chenopodium quinoa	AUR62027261-RA	AUR62027261	CqCHI5	I	OG1	TGACG-motif	1127	1132	cis-acting regulatory element involved in the MeJA-responsiveness
Chenopodium quinoa	AUR62027261-RA	AUR62027261	CqCHI5	I	OG1	TGACG-motif	1148	1153	cis-acting regulatory element involved in the MeJA-responsiveness
Chenopodium quinoa	AUR62027261-RA	AUR62027261	CqCHI5	I	OG1	TGACG-motif	1176	1181	cis-acting regulatory element involved in the MeJA-responsiveness
Chenopodium quinoa	AUR62027261-RA	AUR62027261	CqCHI5	I	OG1	Box 4	847	853	part of a conserved DNA module involved in light responsiveness
Chenopodium quinoa	AUR62027261-RA	AUR62027261	CqCHI5	I	OG1	Box 4	1719	1725	part of a conserved DNA module involved in light responsiveness
Chenopodium quinoa	AUR62027261-RA	AUR62027261	CqCHI5	I	OG1	HD-Zip 1	1769	1777.5	element involved in differentiation of the palisade mesophyll cells
Chenopodium quinoa	AUR62027261-RA	AUR62027261	CqCHI5	I	OG1	TGA-element	38	44	auxin-responsive element
Chenopodium quinoa	AUR62027261-RA	AUR62027261	CqCHI5	I	OG1	TGA-element	582	588	auxin-responsive element
Chenopodium quinoa	AUR62027261-RA	AUR62027261	CqCHI5	I	OG1	GT1-motif	320	326	light responsive element
Chenopodium quinoa	AUR62027261-RA	AUR62027261	CqCHI5	I	OG1	AE-box	87	95	part of a module for light response
Chenopodium quinoa	AUR62030612-RA	AUR62030612	CqCHI7	IV	OG3	TGACG-motif	163	168	cis-acting regulatory element involved in the MeJA-responsiveness
Chenopodium quinoa	AUR62030612-RA	AUR62030612	CqCHI7	IV	OG3	Box 4	961	967	part of a conserved DNA module involved in light responsiveness
Chenopodium quinoa	AUR62030612-RA	AUR62030612	CqCHI7	IV	OG3	G-box	382	388	cis-acting regulatory element involved in light responsiveness
Chenopodium quinoa	AUR62030612-RA	AUR62030612	CqCHI7	IV	OG3	G-box	391	397	cis-acting regulatory element involved in light responsiveness
Chenopodium quinoa	AUR62030612-RA	AUR62030612	CqCHI7	IV	OG3	MBS	331	337	MYB binding site involved in drought-inducibility
Chenopodium quinoa	AUR62030612-RA	AUR62030612	CqCHI7	IV	OG3	GT1-motif	293	300	light responsive element
Chenopodium quinoa	AUR62030612-RA	AUR62030612	CqCHI7	IV	OG3	GT1-motif	411	417	light responsive element
Chenopodium quinoa	AUR62030612-RA	AUR62030612	CqCHI7	IV	OG3	O2-site	379	388	cis-acting regulatory element involved in zein metabolism regulation
Chenopodium quinoa	AUR62030612-RA	AUR62030612	CqCHI7	IV	OG3	GCN4_motif	639	646	cis-regulatory element involved in endosperm expression
Chenopodium quinoa	AUR62030612-RA	AUR62030612	CqCHI7	IV	OG3	MRE	701	708	MYB binding site involved in light responsiveness
Chenopodium quinoa	AUR62030612-RA	AUR62030612	CqCHI7	IV	OG3	Sp1	1925	1931	light responsive element
Chenopodium quinoa	AUR62030612-RA	AUR62030612	CqCHI7	IV	OG3	ABRE	382	388	cis-acting element involved in the abscisic acid responsiveness
Chenopodium quinoa	AUR62030612-RA	AUR62030612	CqCHI7	IV	OG3	ABRE	383	388	cis-acting element involved in the abscisic acid responsiveness
Chenopodium quinoa	AUR62030612-RA	AUR62030612	CqCHI7	IV	OG3	ABRE	392	397	cis-acting element involved in the abscisic acid responsiveness
Chenopodium quinoa	AUR62030612-RA	AUR62030612	CqCHI7	IV	OG3	AuxRR-core	1859	1866	cis-acting regulatory element involved in auxin responsiveness
Chenopodium quinoa	AUR62030612-RA	AUR62030612	CqCHI7	IV	OG3	CGTCA-motif	163	168	cis-acting regulatory element involved in the MeJA-responsiveness
Chenopodium quinoa	AUR62030612-RA	AUR62030612	CqCHI7	IV	OG3	TCA-element	1490	1499	cis-acting element involved in salicylic acid responsiveness
Chenopodium quinoa	AUR62030612-RA	AUR62030612	CqCHI7	IV	OG3	G-box	382	388	cis-acting regulatory element involved in light responsiveness
Chenopodium quinoa	AUR62036022-RA	AUR62036022	CqCHI6	III	OG5	TATC-box	725	732	cis-acting element involved in gibberellin-responsiveness
Chenopodium quinoa	AUR62036022-RA	AUR62036022	CqCHI6	III	OG5	TATC-box	1433	1440	cis-acting element involved in gibberellin-responsiveness
Chenopodium quinoa	AUR62036022-RA	AUR62036022	CqCHI6	III	OG5	ABRE	1804	1809	cis-acting element involved in the abscisic acid responsiveness
Chenopodium quinoa	AUR62036022-RA	AUR62036022	CqCHI6	III	OG5	ARE	23	29	cis-acting regulatory element essential for the anaerobic induction
Chenopodium quinoa	AUR62036022-RA	AUR62036022	CqCHI6	III	OG5	ARE	125	131	cis-acting regulatory element essential for the anaerobic induction
Chenopodium quinoa	AUR62036022-RA	AUR62036022	CqCHI6	III	OG5	ARE	718	724	cis-acting regulatory element essential for the anaerobic induction
Chenopodium quinoa	AUR62036022-RA	AUR62036022	CqCHI6	III	OG5	ARE	1020	1026	cis-acting regulatory element essential for the anaerobic induction
Chenopodium quinoa	AUR62036022-RA	AUR62036022	CqCHI6	III	OG5	ARE	1060	1066	cis-acting regulatory element essential for the anaerobic induction
Chenopodium quinoa	AUR62036022-RA	AUR62036022	CqCHI6	III	OG5	ARE	1385	1391	cis-acting regulatory element essential for the anaerobic induction
Chenopodium quinoa	AUR62036022-RA	AUR62036022	CqCHI6	III	OG5	TCA-element	556	565	cis-acting element involved in salicylic acid responsiveness
Chenopodium quinoa	AUR62036022-RA	AUR62036022	CqCHI6	III	OG5	TCA-element	1254	1264	cis-acting element involved in salicylic acid responsiveness
Chenopodium quinoa	AUR62036022-RA	AUR62036022	CqCHI6	III	OG5	GATA-motif	635	642	part of a light responsive element
Chenopodium quinoa	AUR62036022-RA	AUR62036022	CqCHI6	III	OG5	TCT-motif	103	109	part of a light responsive element
Chenopodium quinoa	AUR62036022-RA	AUR62036022	CqCHI6	III	OG5	GT1-motif	49	56	light responsive element
Chenopodium quinoa	AUR62036022-RA	AUR62036022	CqCHI6	III	OG5	GT1-motif	50	56	light responsive element
Chenopodium quinoa	AUR62036022-RA	AUR62036022	CqCHI6	III	OG5	O2-site	1168	1176	cis-acting regulatory element involved in zein metabolism regulation
Chenopodium quinoa	AUR62036022-RA	AUR62036022	CqCHI6	III	OG5	G-box	1803	1809	cis-acting regulatory element involved in light responsiveness
Chenopodium quinoa	AUR62036022-RA	AUR62036022	CqCHI6	III	OG5	TCCC-motif	859	866	part of a light responsive element
Brassica oleracea	Bo4g098170.1	Bo4g098170	BoCHI1	III	OG5	ABRE	420	427	cis-acting element involved in the abscisic acid responsiveness
Brassica oleracea	Bo4g098170.1	Bo4g098170	BoCHI1	III	OG5	ABRE	1769	1778	cis-acting element involved in the abscisic acid responsiveness
Brassica oleracea	Bo4g098170.1	Bo4g098170	BoCHI1	III	OG5	ABRE	1771	1776	cis-acting element involved in the abscisic acid responsiveness
Brassica oleracea	Bo4g098170.1	Bo4g098170	BoCHI1	III	OG5	ABRE	1882	1892	cis-acting element involved in the abscisic acid responsiveness
Brassica oleracea	Bo4g098170.1	Bo4g098170	BoCHI1	III	OG5	ABRE	1885	1890	cis-acting element involved in the abscisic acid responsiveness
Brassica oleracea	Bo4g098170.1	Bo4g098170	BoCHI1	III	OG5	ARE	1333	1339	cis-acting regulatory element essential for the anaerobic induction
Brassica oleracea	Bo4g098170.1	Bo4g098170	BoCHI1	III	OG5	ARE	1338	1344	cis-acting regulatory element essential for the anaerobic induction
Brassica oleracea	Bo4g098170.1	Bo4g098170	BoCHI1	III	OG5	CGTCA-motif	628	633	cis-acting regulatory element involved in the MeJA-responsiveness
Brassica oleracea	Bo4g098170.1	Bo4g098170	BoCHI1	III	OG5	CGTCA-motif	1297	1302	cis-acting regulatory element involved in the MeJA-responsiveness
Brassica oleracea	Bo4g098170.1	Bo4g098170	BoCHI1	III	OG5	CGTCA-motif	1474	1479	cis-acting regulatory element involved in the MeJA-responsiveness
Brassica oleracea	Bo4g098170.1	Bo4g098170	BoCHI1	III	OG5	CGTCA-motif	1665	1670	cis-acting regulatory element involved in the MeJA-responsiveness
Brassica oleracea	Bo4g098170.1	Bo4g098170	BoCHI1	III	OG5	CGTCA-motif	1671	1676	cis-acting regulatory element involved in the MeJA-responsiveness
Brassica oleracea	Bo4g098170.1	Bo4g098170	BoCHI1	III	OG5	L-box	75	84	part of a light responsive element
Brassica oleracea	Bo4g098170.1	Bo4g098170	BoCHI1	III	OG5	GATA-motif	409	418	part of a light responsive element
Brassica oleracea	Bo4g098170.1	Bo4g098170	BoCHI1	III	OG5	GATA-motif	842	849	part of a light responsive element
Brassica oleracea	Bo4g098170.1	Bo4g098170	BoCHI1	III	OG5	CAT-box	812	818	cis-acting regulatory element related to meristem expression
Brassica oleracea	Bo4g098170.1	Bo4g098170	BoCHI1	III	OG5	TCT-motif	431	437	part of a light responsive element
Brassica oleracea	Bo4g098170.1	Bo4g098170	BoCHI1	III	OG5	TCT-motif	1161	1167	part of a light responsive element
Brassica oleracea	Bo4g098170.1	Bo4g098170	BoCHI1	III	OG5	TGACG-motif	628	633	cis-acting regulatory element involved in the MeJA-responsiveness
Brassica oleracea	Bo4g098170.1	Bo4g098170	BoCHI1	III	OG5	TGACG-motif	1297	1302	cis-acting regulatory element involved in the MeJA-responsiveness
Brassica oleracea	Bo4g098170.1	Bo4g098170	BoCHI1	III	OG5	TGACG-motif	1474	1479	cis-acting regulatory element involved in the MeJA-responsiveness
Brassica oleracea	Bo4g098170.1	Bo4g098170	BoCHI1	III	OG5	TGACG-motif	1665	1670	cis-acting regulatory element involved in the MeJA-responsiveness
Brassica oleracea	Bo4g098170.1	Bo4g098170	BoCHI1	III	OG5	TGACG-motif	1671	1676	cis-acting regulatory element involved in the MeJA-responsiveness
Brassica oleracea	Bo4g098170.1	Bo4g098170	BoCHI1	III	OG5	LTR	1528	1534	cis-acting element involved in low-temperature responsiveness
Brassica oleracea	Bo4g098170.1	Bo4g098170	BoCHI1	III	OG5	MBS	92	98	MYB binding site involved in drought-inducibility
Brassica oleracea	Bo4g098170.1	Bo4g098170	BoCHI1	III	OG5	MBS	1724	1730	MYB binding site involved in drought-inducibility
Brassica oleracea	Bo4g098170.1	Bo4g098170	BoCHI1	III	OG5	MBS	1748	1754	MYB binding site involved in drought-inducibility
Brassica oleracea	Bo4g098170.1	Bo4g098170	BoCHI1	III	OG5	GT1-motif	907	914	light responsive element
Brassica oleracea	Bo4g098170.1	Bo4g098170	BoCHI1	III	OG5	GA-motif	1348	1356	part of a light responsive element
Brassica oleracea	Bo4g098170.1	Bo4g098170	BoCHI1	III	OG5	GCN4_motif	1915	1922	cis-regulatory element involved in endosperm expression
Brassica oleracea	Bo4g098170.1	Bo4g098170	BoCHI1	III	OG5	AE-box	860	868	part of a module for light response
Brassica oleracea	Bo4g098170.1	Bo4g098170	BoCHI1	III	OG5	G-box	1771	1777	cis-acting regulatory element involved in light responsiveness
Brassica oleracea	Bo4g098170.1	Bo4g098170	BoCHI1	III	OG5	G-box	1884	1890	cis-acting regulatory element involved in light responsiveness
Brassica oleracea	Bo4g160130.1	Bo4g160130	BoCHI2	III	OG2	ARE	671	677	cis-acting regulatory element essential for the anaerobic induction
Brassica oleracea	Bo4g160130.1	Bo4g160130	BoCHI2	III	OG2	ARE	741	747	cis-acting regulatory element essential for the anaerobic induction
Brassica oleracea	Bo4g160130.1	Bo4g160130	BoCHI2	III	OG2	ARE	1049	1055	cis-acting regulatory element essential for the anaerobic induction
Brassica oleracea	Bo4g160130.1	Bo4g160130	BoCHI2	III	OG2	TC-rich repeats	34	43	cis-acting element involved in defense and stress responsiveness
Brassica oleracea	Bo4g160130.1	Bo4g160130	BoCHI2	III	OG2	TC-rich repeats	1707	1716	cis-acting element involved in defense and stress responsiveness
Brassica oleracea	Bo4g160130.1	Bo4g160130	BoCHI2	III	OG2	CGTCA-motif	871	876	cis-acting regulatory element involved in the MeJA-responsiveness
Brassica oleracea	Bo4g160130.1	Bo4g160130	BoCHI2	III	OG2	TCA-element	1671	1680	cis-acting element involved in salicylic acid responsiveness
Brassica oleracea	Bo4g160130.1	Bo4g160130	BoCHI2	III	OG2	TGACG-motif	871	876	cis-acting regulatory element involved in the MeJA-responsiveness
Brassica oleracea	Bo4g160130.1	Bo4g160130	BoCHI2	III	OG2	Box 4	1986	1992	part of a conserved DNA module involved in light responsiveness
Brassica oleracea	Bo4g160130.1	Bo4g160130	BoCHI2	III	OG2	GARE-motif	1700	1707	gibberellin-responsive element
Brassica oleracea	Bo4g160130.1	Bo4g160130	BoCHI2	III	OG2	GT1-motif	386	392	light responsive element
Brassica oleracea	Bo4g160130.1	Bo4g160130	BoCHI2	III	OG2	GT1-motif	1305	1311	light responsive element
Brassica oleracea	Bo4g160130.1	Bo4g160130	BoCHI2	III	OG2	GT1-motif	1326	1332	light responsive element
Brassica oleracea	Bo4g160130.1	Bo4g160130	BoCHI2	III	OG2	GT1-motif	1939	1945	light responsive element
Brassica oleracea	Bo4g160130.1	Bo4g160130	BoCHI2	III	OG2	TGA-element	1679	1685	auxin-responsive element
Brassica oleracea	Bo6g031530.1	Bo6g031530	BoCHI3	III	OG4	G-box	1316	1325	cis-acting regulatory element involved in light responsiveness
Brassica oleracea	Bo6g031530.1	Bo6g031530	BoCHI3	III	OG4	ARE	3	9	cis-acting regulatory element essential for the anaerobic induction
Brassica oleracea	Bo6g031530.1	Bo6g031530	BoCHI3	III	OG4	ARE	962	968	cis-acting regulatory element essential for the anaerobic induction
Brassica oleracea	Bo6g031530.1	Bo6g031530	BoCHI3	III	OG4	ARE	995	1001	cis-acting regulatory element essential for the anaerobic induction
Brassica oleracea	Bo6g031530.1	Bo6g031530	BoCHI3	III	OG4	ARE	1013	1019	cis-acting regulatory element essential for the anaerobic induction
Brassica oleracea	Bo6g031530.1	Bo6g031530	BoCHI3	III	OG4	ARE	1774	1780	cis-acting regulatory element essential for the anaerobic induction
Brassica oleracea	Bo6g031530.1	Bo6g031530	BoCHI3	III	OG4	ARE	1900	1906	cis-acting regulatory element essential for the anaerobic induction
Brassica oleracea	Bo6g031530.1	Bo6g031530	BoCHI3	III	OG4	TCCC-motif	786	793	part of a light responsive element
Brassica oleracea	Bo6g031530.1	Bo6g031530	BoCHI3	III	OG4	GARE-motif	724	731	gibberellin-responsive element
Brassica oleracea	Bo6g031530.1	Bo6g031530	BoCHI3	III	OG4	GCN4_motif	139	146	cis-regulatory element involved in endosperm expression
Brassica oleracea	Bo6g031530.1	Bo6g031530	BoCHI3	III	OG4	GCN4_motif	300	307	cis-regulatory element involved in endosperm expression
Brassica oleracea	Bo6g031530.1	Bo6g031530	BoCHI3	III	OG4	TGA-element	1645	1651	auxin-responsive element
Brassica oleracea	Bo6g031530.1	Bo6g031530	BoCHI3	III	OG4	TGA-element	1676	1682	auxin-responsive element
Brassica oleracea	Bo6g031530.1	Bo6g031530	BoCHI3	III	OG4	TGA-element	1732	1738	auxin-responsive element
Brassica oleracea	Bo6g031530.1	Bo6g031530	BoCHI3	III	OG4	TGA-element	1779	1785	auxin-responsive element
Brassica oleracea	Bo6g031530.1	Bo6g031530	BoCHI3	III	OG4	TGA-element	1810	1816	auxin-responsive element
Brassica oleracea	Bo6g031530.1	Bo6g031530	BoCHI3	III	OG4	TGA-element	1867	1873	auxin-responsive element
Brassica oleracea	Bo6g031530.1	Bo6g031530	BoCHI3	III	OG4	MBS	1654	1660	MYB binding site involved in drought-inducibility
Brassica oleracea	Bo6g031530.1	Bo6g031530	BoCHI3	III	OG4	MBS	1888	1894	MYB binding site involved in drought-inducibility
Brassica oleracea	Bo6g031530.1	Bo6g031530	BoCHI3	III	OG4	GT1-motif	1723	1729	light responsive element
Brassica oleracea	Bo6g031530.1	Bo6g031530	BoCHI3	III	OG4	TCT-motif	170	176	part of a light responsive element
Brassica oleracea	Bo6g031530.1	Bo6g031530	BoCHI3	III	OG4	TCT-motif	1223	1229	part of a light responsive element
Brassica oleracea	Bo6g031530.1	Bo6g031530	BoCHI3	III	OG4	P-box	59	66	gibberellin-responsive element
Brassica oleracea	Bo6g031530.1	Bo6g031530	BoCHI3	III	OG4	P-box	649	656	gibberellin-responsive element
Brassica oleracea	Bo6g031530.1	Bo6g031530	BoCHI3	III	OG4	P-box	951	958	gibberellin-responsive element
Brassica oleracea	Bo6g031530.1	Bo6g031530	BoCHI3	III	OG4	AACA_motif	276	287	involved in endosperm-specific negative expression
Brassica oleracea	Bo6g068550.1	Bo6g068550	BoCHI4	I	OG1	G-box	1891	1897	cis-acting regulatory element involved in light responsiveness
Brassica oleracea	Bo6g068550.1	Bo6g068550	BoCHI4	I	OG1	TCCC-motif	944	951	part of a light responsive element
Brassica oleracea	Bo6g068550.1	Bo6g068550	BoCHI4	I	OG1	GA-motif	864	872	part of a light responsive element
Brassica oleracea	Bo6g068550.1	Bo6g068550	BoCHI4	I	OG1	Box 4	1164	1170	part of a conserved DNA module involved in light responsiveness
Brassica oleracea	Bo6g068550.1	Bo6g068550	BoCHI4	I	OG1	Box 4	1633	1639	part of a conserved DNA module involved in light responsiveness
Brassica oleracea	Bo6g068550.1	Bo6g068550	BoCHI4	I	OG1	TGACG-motif	815	820	cis-acting regulatory element involved in the MeJA-responsiveness
Brassica oleracea	Bo6g068550.1	Bo6g068550	BoCHI4	I	OG1	TGACG-motif	860	865	cis-acting regulatory element involved in the MeJA-responsiveness
Brassica oleracea	Bo6g068550.1	Bo6g068550	BoCHI4	I	OG1	TGACG-motif	930	935	cis-acting regulatory element involved in the MeJA-responsiveness
Brassica oleracea	Bo6g068550.1	Bo6g068550	BoCHI4	I	OG1	TCT-motif	1952	1958	part of a light responsive element
Brassica oleracea	Bo6g068550.1	Bo6g068550	BoCHI4	I	OG1	P-box	507	514	gibberellin-responsive element
Brassica oleracea	Bo6g068550.1	Bo6g068550	BoCHI4	I	OG1	P-box	1082	1089	gibberellin-responsive element
Brassica oleracea	Bo6g068550.1	Bo6g068550	BoCHI4	I	OG1	TC-rich repeats	882	891	cis-acting element involved in defense and stress responsiveness
Brassica oleracea	Bo6g068550.1	Bo6g068550	BoCHI4	I	OG1	AuxRE	744	755	part of an auxin-responsive element
Brassica oleracea	Bo6g068550.1	Bo6g068550	BoCHI4	I	OG1	TCA-element	1275	1285	cis-acting element involved in salicylic acid responsiveness
Brassica oleracea	Bo6g068550.1	Bo6g068550	BoCHI4	I	OG1	CGTCA-motif	815	820	cis-acting regulatory element involved in the MeJA-responsiveness
Brassica oleracea	Bo6g068550.1	Bo6g068550	BoCHI4	I	OG1	CGTCA-motif	860	865	cis-acting regulatory element involved in the MeJA-responsiveness
Brassica oleracea	Bo6g068550.1	Bo6g068550	BoCHI4	I	OG1	CGTCA-motif	930	935	cis-acting regulatory element involved in the MeJA-responsiveness
Brassica oleracea	Bo6g068550.1	Bo6g068550	BoCHI4	I	OG1	AAAC-motif	1689	1700	light responsive element
Brassica oleracea	Bo6g068550.1	Bo6g068550	BoCHI4	I	OG1	G-box	1891	1897	cis-acting regulatory element involved in light responsiveness
Brassica oleracea	Bo6g068550.1	Bo6g068550	BoCHI4	I	OG1	Box II	1959	1968	part of a light responsive element
Brassica oleracea	Bo6g068550.1	Bo6g068550	BoCHI4	I	OG1	ATCT-motif	1690	1699	part of a conserved DNA module involved in light responsiveness
Brassica oleracea	Bo6g068550.1	Bo6g068550	BoCHI4	I	OG1	ARE	758	764	cis-acting regulatory element essential for the anaerobic induction
Brassica oleracea	Bo6g068550.1	Bo6g068550	BoCHI4	I	OG1	ARE	1043	1049	cis-acting regulatory element essential for the anaerobic induction
Brassica oleracea	Bo6g068550.1	Bo6g068550	BoCHI4	I	OG1	ARE	1056	1062	cis-acting regulatory element essential for the anaerobic induction
Brassica oleracea	Bo6g068550.1	Bo6g068550	BoCHI4	I	OG1	ARE	1122	1128	cis-acting regulatory element essential for the anaerobic induction
Brassica oleracea	Bo6g068550.1	Bo6g068550	BoCHI4	I	OG1	ARE	1211	1217	cis-acting regulatory element essential for the anaerobic induction
Brassica oleracea	Bo6g068550.1	Bo6g068550	BoCHI4	I	OG1	ARE	1736	1742	cis-acting regulatory element essential for the anaerobic induction
Brassica oleracea	Bo6g068550.1	Bo6g068550	BoCHI4	I	OG1	MRE	1746	1753	MYB binding site involved in light responsiveness
Brassica oleracea	Bo6g068550.1	Bo6g068550	BoCHI4	I	OG1	MRE	1979	1986	MYB binding site involved in light responsiveness
Brassica oleracea	Bo6g068550.1	Bo6g068550	BoCHI4	I	OG1	ABRE	1891	1897	cis-acting element involved in the abscisic acid responsiveness
Brassica oleracea	Bo6g068550.1	Bo6g068550	BoCHI4	I	OG1	ABRE	1892	1897	cis-acting element involved in the abscisic acid responsiveness
Brassica oleracea	Bo7g117570.1	Bo7g117570	BoCHI5	I	OG1	CAT-box	1647	1653	cis-acting regulatory element related to meristem expression
Brassica oleracea	Bo7g117570.1	Bo7g117570	BoCHI5	I	OG1	Box 4	695	701	part of a conserved DNA module involved in light responsiveness
Brassica oleracea	Bo7g117570.1	Bo7g117570	BoCHI5	I	OG1	GT1-motif	1870	1877	light responsive element
Brassica oleracea	Bo7g117570.1	Bo7g117570	BoCHI5	I	OG1	GT1-motif	1871	1877	light responsive element
Brassica oleracea	Bo7g117570.1	Bo7g117570	BoCHI5	I	OG1	AE-box	1675	1683	part of a module for light response
Brassica oleracea	Bo7g117570.1	Bo7g117570	BoCHI5	I	OG1	AE-box	1792	1800	part of a module for light response
Brassica oleracea	Bo7g117570.1	Bo7g117570	BoCHI5	I	OG1	TATC-box	1220	1227	cis-acting element involved in gibberellin-responsiveness
Brassica oleracea	Bo7g117570.1	Bo7g117570	BoCHI5	I	OG1	MRE	1873	1880	MYB binding site involved in light responsiveness
Brassica oleracea	Bo7g117570.1	Bo7g117570	BoCHI5	I	OG1	ARE	1355	1361	cis-acting regulatory element essential for the anaerobic induction
Brassica oleracea	Bo7g117570.1	Bo7g117570	BoCHI5	I	OG1	ARE	1749	1755	cis-acting regulatory element essential for the anaerobic induction
Brassica oleracea	Bo7g117570.1	Bo7g117570	BoCHI5	I	OG1	ARE	1764	1770	cis-acting regulatory element essential for the anaerobic induction
Brassica oleracea	Bo8g088480.1	Bo8g088480	BoCHI6	I	OG1	G-box	1836	1842	cis-acting regulatory element involved in light responsiveness
Brassica oleracea	Bo8g088480.1	Bo8g088480	BoCHI6	I	OG1	Gap-box	824	833.5	part of a light responsive element
Brassica oleracea	Bo8g088480.1	Bo8g088480	BoCHI6	I	OG1	ABRE	1836	1842	cis-acting element involved in the abscisic acid responsiveness
Brassica oleracea	Bo8g088480.1	Bo8g088480	BoCHI6	I	OG1	ABRE	1837	1842	cis-acting element involved in the abscisic acid responsiveness
Brassica oleracea	Bo8g088480.1	Bo8g088480	BoCHI6	I	OG1	MRE	1868	1875	MYB binding site involved in light responsiveness
Brassica oleracea	Bo8g088480.1	Bo8g088480	BoCHI6	I	OG1	MRE	1979	1986	MYB binding site involved in light responsiveness
Brassica oleracea	Bo8g088480.1	Bo8g088480	BoCHI6	I	OG1	ARE	1487	1493	cis-acting regulatory element essential for the anaerobic induction
Brassica oleracea	Bo8g088480.1	Bo8g088480	BoCHI6	I	OG1	ARE	1542	1548	cis-acting regulatory element essential for the anaerobic induction
Brassica oleracea	Bo8g088480.1	Bo8g088480	BoCHI6	I	OG1	GA-motif	796	804	part of a light responsive element
Brassica oleracea	Bo8g088480.1	Bo8g088480	BoCHI6	I	OG1	GT1-motif	1015	1021	light responsive element
Brassica oleracea	Bo8g088480.1	Bo8g088480	BoCHI6	I	OG1	LTR	1770	1776	cis-acting element involved in low-temperature responsiveness
Brassica oleracea	Bo8g088480.1	Bo8g088480	BoCHI6	I	OG1	G-box	1836	1842	cis-acting regulatory element involved in light responsiveness
Brassica oleracea	Bo8g088480.1	Bo8g088480	BoCHI6	I	OG1	TCT-motif	650	656	part of a light responsive element
Brassica oleracea	Bo8g088480.1	Bo8g088480	BoCHI6	I	OG1	GATA-motif	188	198	part of a light responsive element
Brassica oleracea	Bo8g089480.1	Bo8g089480	BoCHI7	I	OG1	AuxRR-core	591	598	cis-acting regulatory element involved in auxin responsiveness
Brassica oleracea	Bo8g089480.1	Bo8g089480	BoCHI7	I	OG1	TC-rich repeats	1446	1455	cis-acting element involved in defense and stress responsiveness
Brassica oleracea	Bo8g089480.1	Bo8g089480	BoCHI7	I	OG1	ACE	164	173	cis-acting element involved in light responsiveness
Brassica oleracea	Bo8g089480.1	Bo8g089480	BoCHI7	I	OG1	G-box	769	775	cis-acting regulatory element involved in light responsiveness
Brassica oleracea	Bo8g089480.1	Bo8g089480	BoCHI7	I	OG1	CGTCA-motif	57	62	cis-acting regulatory element involved in the MeJA-responsiveness
Brassica oleracea	Bo8g089480.1	Bo8g089480	BoCHI7	I	OG1	CGTCA-motif	549	554	cis-acting regulatory element involved in the MeJA-responsiveness
Brassica oleracea	Bo8g089480.1	Bo8g089480	BoCHI7	I	OG1	TCA-element	559	568	cis-acting element involved in salicylic acid responsiveness
Brassica oleracea	Bo8g089480.1	Bo8g089480	BoCHI7	I	OG1	MRE	1318	1325	MYB binding site involved in light responsiveness
Brassica oleracea	Bo8g089480.1	Bo8g089480	BoCHI7	I	OG1	MRE	1881	1888	MYB binding site involved in light responsiveness
Brassica oleracea	Bo8g089480.1	Bo8g089480	BoCHI7	I	OG1	MRE	1983	1990	MYB binding site involved in light responsiveness
Brassica oleracea	Bo8g089480.1	Bo8g089480	BoCHI7	I	OG1	TGA-box	546	554	part of an auxin-responsive element
Brassica oleracea	Bo8g089480.1	Bo8g089480	BoCHI7	I	OG1	ABRE	1437	1442	cis-acting element involved in the abscisic acid responsiveness
Brassica oleracea	Bo8g089480.1	Bo8g089480	BoCHI7	I	OG1	G-box	1436	1442	cis-acting regulatory element involved in light responsiveness
Brassica oleracea	Bo8g089480.1	Bo8g089480	BoCHI7	I	OG1	AE-box	989	997	part of a module for light response
Brassica oleracea	Bo8g089480.1	Bo8g089480	BoCHI7	I	OG1	AE-box	1687	1695	part of a module for light response
Brassica oleracea	Bo8g089480.1	Bo8g089480	BoCHI7	I	OG1	GARE-motif	851	858	gibberellin-responsive element
Brassica oleracea	Bo8g089480.1	Bo8g089480	BoCHI7	I	OG1	GARE-motif	1595	1602	gibberellin-responsive element
Brassica oleracea	Bo8g089480.1	Bo8g089480	BoCHI7	I	OG1	O2-site	696	704	cis-acting regulatory element involved in zein metabolism regulation
Brassica oleracea	Bo8g089480.1	Bo8g089480	BoCHI7	I	OG1	GT1-motif	1605	1612	light responsive element
Brassica oleracea	Bo8g089480.1	Bo8g089480	BoCHI7	I	OG1	3-AF1 binding site	1045	1055	light responsive element
Brassica oleracea	Bo8g089480.1	Bo8g089480	BoCHI7	I	OG1	TGACG-motif	57	62	cis-acting regulatory element involved in the MeJA-responsiveness
Brassica oleracea	Bo8g089480.1	Bo8g089480	BoCHI7	I	OG1	TGACG-motif	549	554	cis-acting regulatory element involved in the MeJA-responsiveness
Brassica oleracea	Bo8g089480.1	Bo8g089480	BoCHI7	I	OG1	Box 4	1328	1334	part of a conserved DNA module involved in light responsiveness
Brassica oleracea	Bo8g089480.1	Bo8g089480	BoCHI7	I	OG1	TCT-motif	408	414	part of a light responsive element
Brassica oleracea	Bo8g089480.1	Bo8g089480	BoCHI7	I	OG1	TCT-motif	544	550	part of a light responsive element
Brassica oleracea	Bo8g089480.1	Bo8g089480	BoCHI7	I	OG1	TCT-motif	1386	1392	part of a light responsive element
Brassica oleracea	Bo8g089480.1	Bo8g089480	BoCHI7	I	OG1	CAT-box	160	166	cis-acting regulatory element related to meristem expression
Brassica oleracea	Bo8g089480.1	Bo8g089480	BoCHI7	I	OG1	CAT-box	1662	1668	cis-acting regulatory element related to meristem expression
Brassica oleracea	Bo8g098500.1	Bo8g098500	BoCHI8	III	OG5	GA-motif	1813	1821	part of a light responsive element
Brassica oleracea	Bo8g098500.1	Bo8g098500	BoCHI8	III	OG5	O2-site	517	526	cis-acting regulatory element involved in zein metabolism regulation
Brassica oleracea	Bo8g098500.1	Bo8g098500	BoCHI8	III	OG5	TCCC-motif	731	738	part of a light responsive element
Brassica oleracea	Bo8g098500.1	Bo8g098500	BoCHI8	III	OG5	G-box	1560	1566	cis-acting regulatory element involved in light responsiveness
Brassica oleracea	Bo8g098500.1	Bo8g098500	BoCHI8	III	OG5	TCT-motif	1411	1417	part of a light responsive element
Brassica oleracea	Bo8g098500.1	Bo8g098500	BoCHI8	III	OG5	P-box	1584	1591	gibberellin-responsive element
Brassica oleracea	Bo8g098500.1	Bo8g098500	BoCHI8	III	OG5	CAT-box	1569	1575	cis-acting regulatory element related to meristem expression
Brassica oleracea	Bo8g098500.1	Bo8g098500	BoCHI8	III	OG5	GATA-motif	193	202	part of a light responsive element
Brassica oleracea	Bo8g098500.1	Bo8g098500	BoCHI8	III	OG5	TGACG-motif	305	310	cis-acting regulatory element involved in the MeJA-responsiveness
Brassica oleracea	Bo8g098500.1	Bo8g098500	BoCHI8	III	OG5	TGACG-motif	442	447	cis-acting regulatory element involved in the MeJA-responsiveness
Brassica oleracea	Bo8g098500.1	Bo8g098500	BoCHI8	III	OG5	G-box	646	652	cis-acting regulatory element involved in light responsiveness
Brassica oleracea	Bo8g098500.1	Bo8g098500	BoCHI8	III	OG5	G-box	1451	1459	cis-acting regulatory element involved in light responsiveness
Brassica oleracea	Bo8g098500.1	Bo8g098500	BoCHI8	III	OG5	G-box	1452	1458	cis-acting regulatory element involved in light responsiveness
Brassica oleracea	Bo8g098500.1	Bo8g098500	BoCHI8	III	OG5	CGTCA-motif	305	310	cis-acting regulatory element involved in the MeJA-responsiveness
Brassica oleracea	Bo8g098500.1	Bo8g098500	BoCHI8	III	OG5	CGTCA-motif	442	447	cis-acting regulatory element involved in the MeJA-responsiveness
Brassica oleracea	Bo8g098500.1	Bo8g098500	BoCHI8	III	OG5	TATC-box	140	147	cis-acting element involved in gibberellin-responsiveness
Brassica oleracea	Bo8g098500.1	Bo8g098500	BoCHI8	III	OG5	ABRE	391	398	cis-acting element involved in the abscisic acid responsiveness
Brassica oleracea	Bo8g098500.1	Bo8g098500	BoCHI8	III	OG5	ABRE	647	652	cis-acting element involved in the abscisic acid responsiveness
Brassica oleracea	Bo8g098500.1	Bo8g098500	BoCHI8	III	OG5	ABRE	1231	1238	cis-acting element involved in the abscisic acid responsiveness
Brassica oleracea	Bo8g098500.1	Bo8g098500	BoCHI8	III	OG5	ABRE	1452	1457	cis-acting element involved in the abscisic acid responsiveness
Brassica oleracea	Bo8g098500.1	Bo8g098500	BoCHI8	III	OG5	ABRE	1465	1474	cis-acting element involved in the abscisic acid responsiveness
Brassica oleracea	Bo8g098500.1	Bo8g098500	BoCHI8	III	OG5	ABRE	1561	1566	cis-acting element involved in the abscisic acid responsiveness
Brassica oleracea	Bo8g098500.1	Bo8g098500	BoCHI8	III	OG5	MRE	1533	1540	MYB binding site involved in light responsiveness
Brassica oleracea	Bo8g098500.1	Bo8g098500	BoCHI8	III	OG5	MSA-like	1242	1251	cis-acting element involved in cell cycle regulation
Brassica oleracea	Bo9g177250.1	Bo9g177250	BoCHI9	IV	OG3	Box 4	826	832	part of a conserved DNA module involved in light responsiveness
Brassica oleracea	Bo9g177250.1	Bo9g177250	BoCHI9	IV	OG3	Box 4	924	930	part of a conserved DNA module involved in light responsiveness
Brassica oleracea	Bo9g177250.1	Bo9g177250	BoCHI9	IV	OG3	GATA-motif	314	321	part of a light responsive element
Brassica oleracea	Bo9g177250.1	Bo9g177250	BoCHI9	IV	OG3	GATA-motif	1511	1518	part of a light responsive element
Brassica oleracea	Bo9g177250.1	Bo9g177250	BoCHI9	IV	OG3	TCT-motif	1920	1926	part of a light responsive element
Brassica oleracea	Bo9g177250.1	Bo9g177250	BoCHI9	IV	OG3	G-box	170	176	cis-acting regulatory element involved in light responsiveness
Brassica oleracea	Bo9g177250.1	Bo9g177250	BoCHI9	IV	OG3	G-box	1475	1481	cis-acting regulatory element involved in light responsiveness
Brassica oleracea	Bo9g177250.1	Bo9g177250	BoCHI9	IV	OG3	WUN-motif	862	871	wound-responsive element
Brassica oleracea	Bo9g177250.1	Bo9g177250	BoCHI9	IV	OG3	GT1-motif	56	62	light responsive element
Brassica oleracea	Bo9g177250.1	Bo9g177250	BoCHI9	IV	OG3	GT1-motif	978	985	light responsive element
Brassica oleracea	Bo9g177250.1	Bo9g177250	BoCHI9	IV	OG3	GT1-motif	1713	1719	light responsive element
Brassica oleracea	Bo9g177250.1	Bo9g177250	BoCHI9	IV	OG3	GT1-motif	1715	1721	light responsive element
Brassica oleracea	Bo9g177250.1	Bo9g177250	BoCHI9	IV	OG3	HD-Zip 1	1501	1509.5	element involved in differentiation of the palisade mesophyll cells
Brassica oleracea	Bo9g177250.1	Bo9g177250	BoCHI9	IV	OG3	ARE	1594	1600	cis-acting regulatory element essential for the anaerobic induction
Brassica oleracea	Bo9g177250.1	Bo9g177250	BoCHI9	IV	OG3	MRE	464	471	MYB binding site involved in light responsiveness
Brassica oleracea	Bo9g177250.1	Bo9g177250	BoCHI9	IV	OG3	MRE	1717	1724	MYB binding site involved in light responsiveness
Brassica oleracea	Bo9g177250.1	Bo9g177250	BoCHI9	IV	OG3	ABRE	170	176	cis-acting element involved in the abscisic acid responsiveness
Brassica oleracea	Bo9g177250.1	Bo9g177250	BoCHI9	IV	OG3	ABRE	171	176	cis-acting element involved in the abscisic acid responsiveness
Brassica oleracea	Bo9g177250.1	Bo9g177250	BoCHI9	IV	OG3	ABRE	1475	1480	cis-acting element involved in the abscisic acid responsiveness
Brassica oleracea	Bo9g177250.1	Bo9g177250	BoCHI9	IV	OG3	ABRE	1726	1731	cis-acting element involved in the abscisic acid responsiveness
Brassica oleracea	Bo9g177250.1	Bo9g177250	BoCHI9	IV	OG3	TCA-element	1536	1545	cis-acting element involved in salicylic acid responsiveness
Brassica oleracea	Bo9g177250.1	Bo9g177250	BoCHI9	IV	OG3	G-box	170	176	cis-acting regulatory element involved in light responsiveness
Brassica oleracea	Bo9g177250.1	Bo9g177250	BoCHI9	IV	OG3	G-box	1475	1483	cis-acting regulatory element involved in light responsiveness
Brassica oleracea	Bo9g177250.1	Bo9g177250	BoCHI9	IV	OG3	G-box	1724	1732	cis-acting regulatory element involved in light responsiveness
Brassica oleracea	Bo9g177250.1	Bo9g177250	BoCHI9	IV	OG3	G-box	1725	1731	cis-acting regulatory element involved in light responsiveness
Ceratopteris richardii	Ceric.06G079000.1	Ceric.06G079000	CriCHI1	III	OG2	ARE	50	56	cis-acting regulatory element essential for the anaerobic induction
Ceratopteris richardii	Ceric.06G079000.1	Ceric.06G079000	CriCHI1	III	OG2	ABRE	537	543	cis-acting element involved in the abscisic acid responsiveness
Ceratopteris richardii	Ceric.06G079000.1	Ceric.06G079000	CriCHI1	III	OG2	ABRE	538	543	cis-acting element involved in the abscisic acid responsiveness
Ceratopteris richardii	Ceric.06G079000.1	Ceric.06G079000	CriCHI1	III	OG2	TCA-element	238	247	cis-acting element involved in salicylic acid responsiveness
Ceratopteris richardii	Ceric.06G079000.1	Ceric.06G079000	CriCHI1	III	OG2	ATCT-motif	1841	1850	part of a conserved DNA module involved in light responsiveness
Ceratopteris richardii	Ceric.06G079000.1	Ceric.06G079000	CriCHI1	III	OG2	G-box	537	543	cis-acting regulatory element involved in light responsiveness
Ceratopteris richardii	Ceric.06G079000.1	Ceric.06G079000	CriCHI1	III	OG2	G-box	1292	1298	cis-acting regulatory element involved in light responsiveness
Ceratopteris richardii	Ceric.06G079000.1	Ceric.06G079000	CriCHI1	III	OG2	CAT-box	1926	1932	cis-acting regulatory element related to meristem expression
Ceratopteris richardii	Ceric.06G079000.1	Ceric.06G079000	CriCHI1	III	OG2	GATA-motif	1975	1984	part of a light responsive element
Ceratopteris richardii	Ceric.06G079000.1	Ceric.06G079000	CriCHI1	III	OG2	AACA_motif	172	183	involved in endosperm-specific negative expression
Ceratopteris richardii	Ceric.06G079000.1	Ceric.06G079000	CriCHI1	III	OG2	G-box	537	543	cis-acting regulatory element involved in light responsiveness
Ceratopteris richardii	Ceric.06G079000.1	Ceric.06G079000	CriCHI1	III	OG2	TCCC-motif	1342	1349	part of a light responsive element
Ceratopteris richardii	Ceric.06G079000.1	Ceric.06G079000	CriCHI1	III	OG2	GT1-motif	64	70	light responsive element
Ceratopteris richardii	Ceric.06G079000.1	Ceric.06G079000	CriCHI1	III	OG2	GT1-motif	1538	1544	light responsive element
Ceratopteris richardii	Ceric.06G079000.1	Ceric.06G079000	CriCHI1	III	OG2	LTR	1263	1269	cis-acting element involved in low-temperature responsiveness
Ceratopteris richardii	Ceric.06G079000.1	Ceric.06G079000	CriCHI1	III	OG2	LTR	1611	1617	cis-acting element involved in low-temperature responsiveness
Ceratopteris richardii	Ceric.06G079000.1	Ceric.06G079000	CriCHI1	III	OG2	TGA-element	1416	1422	auxin-responsive element
Ceratopteris richardii	Ceric.06G079000.1	Ceric.06G079000	CriCHI1	III	OG2	GC-motif	1394	1400	enhancer-like element involved in anoxic specific inducibility
Ceratopteris richardii	Ceric.09G016600.1	Ceric.09G016600	CriCHI2	IV	OG3	Box 4	148	154	part of a conserved DNA module involved in light responsiveness
Ceratopteris richardii	Ceric.09G016600.1	Ceric.09G016600	CriCHI2	IV	OG3	TGACG-motif	159	164	cis-acting regulatory element involved in the MeJA-responsiveness
Ceratopteris richardii	Ceric.09G016600.1	Ceric.09G016600	CriCHI2	IV	OG3	TGACG-motif	1676	1681	cis-acting regulatory element involved in the MeJA-responsiveness
Ceratopteris richardii	Ceric.09G016600.1	Ceric.09G016600	CriCHI2	IV	OG3	TCT-motif	291	297	part of a light responsive element
Ceratopteris richardii	Ceric.09G016600.1	Ceric.09G016600	CriCHI2	IV	OG3	TCT-motif	336	342	part of a light responsive element
Ceratopteris richardii	Ceric.09G016600.1	Ceric.09G016600	CriCHI2	IV	OG3	P-box	820	827	gibberellin-responsive element
Ceratopteris richardii	Ceric.09G016600.1	Ceric.09G016600	CriCHI2	IV	OG3	GATA-motif	1408	1415	part of a light responsive element
Ceratopteris richardii	Ceric.09G016600.1	Ceric.09G016600	CriCHI2	IV	OG3	GATA-motif	1656	1665	part of a light responsive element
Ceratopteris richardii	Ceric.09G016600.1	Ceric.09G016600	CriCHI2	IV	OG3	CAT-box	368	374	cis-acting regulatory element related to meristem expression
Ceratopteris richardii	Ceric.09G016600.1	Ceric.09G016600	CriCHI2	IV	OG3	G-box	64	70	cis-acting regulatory element involved in light responsiveness
Ceratopteris richardii	Ceric.09G016600.1	Ceric.09G016600	CriCHI2	IV	OG3	G-box	409	415	cis-acting regulatory element involved in light responsiveness
Ceratopteris richardii	Ceric.09G016600.1	Ceric.09G016600	CriCHI2	IV	OG3	G-box	1476	1482	cis-acting regulatory element involved in light responsiveness
Ceratopteris richardii	Ceric.09G016600.1	Ceric.09G016600	CriCHI2	IV	OG3	LAMP-element	218	226	part of a light responsive element
Ceratopteris richardii	Ceric.09G016600.1	Ceric.09G016600	CriCHI2	IV	OG3	LTR	173	179	cis-acting element involved in low-temperature responsiveness
Ceratopteris richardii	Ceric.09G016600.1	Ceric.09G016600	CriCHI2	IV	OG3	GT1-motif	1309	1315	light responsive element
Ceratopteris richardii	Ceric.09G016600.1	Ceric.09G016600	CriCHI2	IV	OG3	MBS	667	673	MYB binding site involved in drought-inducibility
Ceratopteris richardii	Ceric.09G016600.1	Ceric.09G016600	CriCHI2	IV	OG3	MBS	1402	1408	MYB binding site involved in drought-inducibility
Ceratopteris richardii	Ceric.09G016600.1	Ceric.09G016600	CriCHI2	IV	OG3	ARE	441	447	cis-acting regulatory element essential for the anaerobic induction
Ceratopteris richardii	Ceric.09G016600.1	Ceric.09G016600	CriCHI2	IV	OG3	ARE	708	714	cis-acting regulatory element essential for the anaerobic induction
Ceratopteris richardii	Ceric.09G016600.1	Ceric.09G016600	CriCHI2	IV	OG3	TATC-box	431	438	cis-acting element involved in gibberellin-responsiveness
Ceratopteris richardii	Ceric.09G016600.1	Ceric.09G016600	CriCHI2	IV	OG3	TATC-box	1293	1300	cis-acting element involved in gibberellin-responsiveness
Ceratopteris richardii	Ceric.09G016600.1	Ceric.09G016600	CriCHI2	IV	OG3	ABRE	64	70	cis-acting element involved in the abscisic acid responsiveness
Ceratopteris richardii	Ceric.09G016600.1	Ceric.09G016600	CriCHI2	IV	OG3	ABRE	65	70	cis-acting element involved in the abscisic acid responsiveness
Ceratopteris richardii	Ceric.09G016600.1	Ceric.09G016600	CriCHI2	IV	OG3	ABRE	410	415	cis-acting element involved in the abscisic acid responsiveness
Ceratopteris richardii	Ceric.09G016600.1	Ceric.09G016600	CriCHI2	IV	OG3	ABRE	1477	1482	cis-acting element involved in the abscisic acid responsiveness
Ceratopteris richardii	Ceric.09G016600.1	Ceric.09G016600	CriCHI2	IV	OG3	ABRE	1569	1574	cis-acting element involved in the abscisic acid responsiveness
Ceratopteris richardii	Ceric.09G016600.1	Ceric.09G016600	CriCHI2	IV	OG3	ABRE	1674	1679	cis-acting element involved in the abscisic acid responsiveness
Ceratopteris richardii	Ceric.09G016600.1	Ceric.09G016600	CriCHI2	IV	OG3	RY-element	308	316	cis-acting regulatory element involved in seed-specific regulation
Ceratopteris richardii	Ceric.09G016600.1	Ceric.09G016600	CriCHI2	IV	OG3	RY-element	353	361	cis-acting regulatory element involved in seed-specific regulation
Ceratopteris richardii	Ceric.09G016600.1	Ceric.09G016600	CriCHI2	IV	OG3	RY-element	1806	1814	cis-acting regulatory element involved in seed-specific regulation
Ceratopteris richardii	Ceric.09G016600.1	Ceric.09G016600	CriCHI2	IV	OG3	G-box	64	70	cis-acting regulatory element involved in light responsiveness
Ceratopteris richardii	Ceric.09G016600.1	Ceric.09G016600	CriCHI2	IV	OG3	G-box	407	415	cis-acting regulatory element involved in light responsiveness
Ceratopteris richardii	Ceric.09G016600.1	Ceric.09G016600	CriCHI2	IV	OG3	G-box	1568	1574	cis-acting regulatory element involved in light responsiveness
Ceratopteris richardii	Ceric.09G016600.1	Ceric.09G016600	CriCHI2	IV	OG3	G-box	1674	1680	cis-acting regulatory element involved in light responsiveness
Ceratopteris richardii	Ceric.09G016600.1	Ceric.09G016600	CriCHI2	IV	OG3	CGTCA-motif	159	164	cis-acting regulatory element involved in the MeJA-responsiveness
Ceratopteris richardii	Ceric.09G016600.1	Ceric.09G016600	CriCHI2	IV	OG3	CGTCA-motif	1676	1681	cis-acting regulatory element involved in the MeJA-responsiveness
Ceratopteris richardii	Ceric.20G092200.1	Ceric.20G092200	CriCHI3	III	OG5	TC-rich repeats	1739	1749	cis-acting element involved in defense and stress responsiveness
Ceratopteris richardii	Ceric.20G092200.1	Ceric.20G092200	CriCHI3	III	OG5	ARE	116	122	cis-acting regulatory element essential for the anaerobic induction
Ceratopteris richardii	Ceric.20G092200.1	Ceric.20G092200	CriCHI3	III	OG5	ARE	1555	1561	cis-acting regulatory element essential for the anaerobic induction
Ceratopteris richardii	Ceric.20G092200.1	Ceric.20G092200	CriCHI3	III	OG5	TATC-box	1504	1511	cis-acting element involved in gibberellin-responsiveness
Ceratopteris richardii	Ceric.20G092200.1	Ceric.20G092200	CriCHI3	III	OG5	O2-site	378	386	cis-acting regulatory element involved in zein metabolism regulation
Ceratopteris richardii	Ceric.20G092200.1	Ceric.20G092200	CriCHI3	III	OG5	O2-site	1276	1285	cis-acting regulatory element involved in zein metabolism regulation
Ceratopteris richardii	Ceric.20G092200.1	Ceric.20G092200	CriCHI3	III	OG5	LTR	1074	1080	cis-acting element involved in low-temperature responsiveness
Ceratopteris richardii	Ceric.20G092200.1	Ceric.20G092200	CriCHI3	III	OG5	LTR	1520	1526	cis-acting element involved in low-temperature responsiveness
Ceratopteris richardii	Ceric.20G092200.1	Ceric.20G092200	CriCHI3	III	OG5	Box 4	653	659	part of a conserved DNA module involved in light responsiveness
Ceratopteris richardii	Ceric.20G092200.1	Ceric.20G092200	CriCHI3	III	OG5	TCT-motif	1739	1745	part of a light responsive element
Ceratopteris richardii	Ceric.20G092200.1	Ceric.20G092200	CriCHI3	III	OG5	CAT-box	1287	1293	cis-acting regulatory element related to meristem expression
Ceratopteris richardii	Ceric.20G092200.1	Ceric.20G092200	CriCHI3	III	OG5	L-box	372	381	part of a light responsive element
Ceratopteris richardii	Ceric.20G092200.1	Ceric.20G092200	CriCHI3	III	OG5	L-box	1042	1050	part of a light responsive element
Ceratopteris richardii	Ceric.30G070500.1	Ceric.30G070500	CriCHI4	III	OG2	LTR	1021	1027	cis-acting element involved in low-temperature responsiveness
Ceratopteris richardii	Ceric.30G070500.1	Ceric.30G070500	CriCHI4	III	OG2	LTR	1827	1833	cis-acting element involved in low-temperature responsiveness
Ceratopteris richardii	Ceric.30G070500.1	Ceric.30G070500	CriCHI4	III	OG2	GT1-motif	1080	1086	light responsive element
Ceratopteris richardii	Ceric.30G070500.1	Ceric.30G070500	CriCHI4	III	OG2	MBS	788	794	MYB binding site involved in drought-inducibility
Ceratopteris richardii	Ceric.30G070500.1	Ceric.30G070500	CriCHI4	III	OG2	GA-motif	1350	1358	part of a light responsive element
Ceratopteris richardii	Ceric.30G070500.1	Ceric.30G070500	CriCHI4	III	OG2	O2-site	334	343	cis-acting regulatory element involved in zein metabolism regulation
Ceratopteris richardii	Ceric.30G070500.1	Ceric.30G070500	CriCHI4	III	OG2	HD-Zip 1	1733	1741.5	element involved in differentiation of the palisade mesophyll cells
Ceratopteris richardii	Ceric.30G070500.1	Ceric.30G070500	CriCHI4	III	OG2	G-box	1315	1321	cis-acting regulatory element involved in light responsiveness
Ceratopteris richardii	Ceric.30G070500.1	Ceric.30G070500	CriCHI4	III	OG2	G-box	1581	1587	cis-acting regulatory element involved in light responsiveness
Ceratopteris richardii	Ceric.30G070500.1	Ceric.30G070500	CriCHI4	III	OG2	AE-box	233	241	part of a module for light response
Ceratopteris richardii	Ceric.30G070500.1	Ceric.30G070500	CriCHI4	III	OG2	L-box	102	112	part of a light responsive element
Ceratopteris richardii	Ceric.30G070500.1	Ceric.30G070500	CriCHI4	III	OG2	GATA-motif	563	570	part of a light responsive element
Ceratopteris richardii	Ceric.30G070500.1	Ceric.30G070500	CriCHI4	III	OG2	TGACG-motif	1688	1693	cis-acting regulatory element involved in the MeJA-responsiveness
Ceratopteris richardii	Ceric.30G070500.1	Ceric.30G070500	CriCHI4	III	OG2	circadian	1449	1458	cis-acting regulatory element involved in circadian control
Ceratopteris richardii	Ceric.30G070500.1	Ceric.30G070500	CriCHI4	III	OG2	GTGGC-motif	1937	1947	part of a light responsive element
Ceratopteris richardii	Ceric.30G070500.1	Ceric.30G070500	CriCHI4	III	OG2	Pc-CMA2c	604	613	part of a light responsive element
Ceratopteris richardii	Ceric.30G070500.1	Ceric.30G070500	CriCHI4	III	OG2	CGTCA-motif	1688	1693	cis-acting regulatory element involved in the MeJA-responsiveness
Ceratopteris richardii	Ceric.30G070500.1	Ceric.30G070500	CriCHI4	III	OG2	G-box	327	333	cis-acting regulatory element involved in light responsiveness
Ceratopteris richardii	Ceric.30G070500.1	Ceric.30G070500	CriCHI4	III	OG2	G-box	903	912	cis-acting regulatory element involved in light responsiveness
Ceratopteris richardii	Ceric.30G070500.1	Ceric.30G070500	CriCHI4	III	OG2	G-box	1307	1313	cis-acting regulatory element involved in light responsiveness
Ceratopteris richardii	Ceric.30G070500.1	Ceric.30G070500	CriCHI4	III	OG2	G-box	1627	1633	cis-acting regulatory element involved in light responsiveness
Ceratopteris richardii	Ceric.30G070500.1	Ceric.30G070500	CriCHI4	III	OG2	G-box	1686	1692	cis-acting regulatory element involved in light responsiveness
Ceratopteris richardii	Ceric.30G070500.1	Ceric.30G070500	CriCHI4	III	OG2	ACE	1655	1664	cis-acting element involved in light responsiveness
Ceratopteris richardii	Ceric.30G070500.1	Ceric.30G070500	CriCHI4	III	OG2	ABRE	328	333	cis-acting element involved in the abscisic acid responsiveness
Ceratopteris richardii	Ceric.30G070500.1	Ceric.30G070500	CriCHI4	III	OG2	ABRE	1307	1312	cis-acting element involved in the abscisic acid responsiveness
Ceratopteris richardii	Ceric.30G070500.1	Ceric.30G070500	CriCHI4	III	OG2	ABRE	1313	1322	cis-acting element involved in the abscisic acid responsiveness
Ceratopteris richardii	Ceric.30G070500.1	Ceric.30G070500	CriCHI4	III	OG2	ABRE	1316	1321	cis-acting element involved in the abscisic acid responsiveness
Ceratopteris richardii	Ceric.30G070500.1	Ceric.30G070500	CriCHI4	III	OG2	ABRE	1579	1588	cis-acting element involved in the abscisic acid responsiveness
Ceratopteris richardii	Ceric.30G070500.1	Ceric.30G070500	CriCHI4	III	OG2	ABRE	1582	1587	cis-acting element involved in the abscisic acid responsiveness
Ceratopteris richardii	Ceric.30G070500.1	Ceric.30G070500	CriCHI4	III	OG2	ABRE	1686	1691	cis-acting element involved in the abscisic acid responsiveness
Ceratopteris richardii	Ceric.30G070500.1	Ceric.30G070500	CriCHI4	III	OG2	ARE	1016	1022	cis-acting regulatory element essential for the anaerobic induction
Ceratopteris richardii	Ceric.30G070500.1	Ceric.30G070500	CriCHI4	III	OG2	ARE	1289	1295	cis-acting regulatory element essential for the anaerobic induction
Ceratopteris richardii	Ceric.30G070500.1	Ceric.30G070500	CriCHI4	III	OG2	ARE	1303	1309	cis-acting regulatory element essential for the anaerobic induction
Ceratopteris richardii	Ceric.30G070500.1	Ceric.30G070500	CriCHI4	III	OG2	ARE	1740	1746	cis-acting regulatory element essential for the anaerobic induction
Ceratopteris richardii	Ceric.32G056800.1	Ceric.32G056800	CriCHI5	III	OG6	O2-site	1609	1618	cis-acting regulatory element involved in zein metabolism regulation
Ceratopteris richardii	Ceric.32G056800.1	Ceric.32G056800	CriCHI5	III	OG6	O2-site	1922	1931	cis-acting regulatory element involved in zein metabolism regulation
Ceratopteris richardii	Ceric.32G056800.1	Ceric.32G056800	CriCHI5	III	OG6	TGA-element	1673	1679	auxin-responsive element
Ceratopteris richardii	Ceric.32G056800.1	Ceric.32G056800	CriCHI5	III	OG6	AE-box	1210	1218	part of a module for light response
Ceratopteris richardii	Ceric.32G056800.1	Ceric.32G056800	CriCHI5	III	OG6	AE-box	1601	1609	part of a module for light response
Ceratopteris richardii	Ceric.32G056800.1	Ceric.32G056800	CriCHI5	III	OG6	G-box	301	307	cis-acting regulatory element involved in light responsiveness
Ceratopteris richardii	Ceric.32G056800.1	Ceric.32G056800	CriCHI5	III	OG6	G-box	1512	1522	cis-acting regulatory element involved in light responsiveness
Ceratopteris richardii	Ceric.32G056800.1	Ceric.32G056800	CriCHI5	III	OG6	G-box	1539	1545	cis-acting regulatory element involved in light responsiveness
Ceratopteris richardii	Ceric.32G056800.1	Ceric.32G056800	CriCHI5	III	OG6	G-box	1750	1756	cis-acting regulatory element involved in light responsiveness
Ceratopteris richardii	Ceric.32G056800.1	Ceric.32G056800	CriCHI5	III	OG6	G-box	1782	1788	cis-acting regulatory element involved in light responsiveness
Ceratopteris richardii	Ceric.32G056800.1	Ceric.32G056800	CriCHI5	III	OG6	G-box	1841	1847	cis-acting regulatory element involved in light responsiveness
Ceratopteris richardii	Ceric.32G056800.1	Ceric.32G056800	CriCHI5	III	OG6	TCT-motif	571	577	part of a light responsive element
Ceratopteris richardii	Ceric.32G056800.1	Ceric.32G056800	CriCHI5	III	OG6	TCT-motif	589	595	part of a light responsive element
Ceratopteris richardii	Ceric.32G056800.1	Ceric.32G056800	CriCHI5	III	OG6	L-box	1157	1167	part of a light responsive element
Ceratopteris richardii	Ceric.32G056800.1	Ceric.32G056800	CriCHI5	III	OG6	L-box	1256	1266	part of a light responsive element
Ceratopteris richardii	Ceric.32G056800.1	Ceric.32G056800	CriCHI5	III	OG6	3-AF1 binding site	662	672	light responsive element
Ceratopteris richardii	Ceric.32G056800.1	Ceric.32G056800	CriCHI5	III	OG6	TGACG-motif	1611	1616	cis-acting regulatory element involved in the MeJA-responsiveness
Ceratopteris richardii	Ceric.32G056800.1	Ceric.32G056800	CriCHI5	III	OG6	TGACG-motif	1733	1738	cis-acting regulatory element involved in the MeJA-responsiveness
Ceratopteris richardii	Ceric.32G056800.1	Ceric.32G056800	CriCHI5	III	OG6	TGACG-motif	1925	1930	cis-acting regulatory element involved in the MeJA-responsiveness
Ceratopteris richardii	Ceric.32G056800.1	Ceric.32G056800	CriCHI5	III	OG6	Box 4	1249	1255	part of a conserved DNA module involved in light responsiveness
Ceratopteris richardii	Ceric.32G056800.1	Ceric.32G056800	CriCHI5	III	OG6	G-box	1023	1029	cis-acting regulatory element involved in light responsiveness
Ceratopteris richardii	Ceric.32G056800.1	Ceric.32G056800	CriCHI5	III	OG6	G-box	1612	1618	cis-acting regulatory element involved in light responsiveness
Ceratopteris richardii	Ceric.32G056800.1	Ceric.32G056800	CriCHI5	III	OG6	G-box	1782	1788	cis-acting regulatory element involved in light responsiveness
Ceratopteris richardii	Ceric.32G056800.1	Ceric.32G056800	CriCHI5	III	OG6	G-box	1923	1929	cis-acting regulatory element involved in light responsiveness
Ceratopteris richardii	Ceric.32G056800.1	Ceric.32G056800	CriCHI5	III	OG6	G-box	1954	1960	cis-acting regulatory element involved in light responsiveness
Ceratopteris richardii	Ceric.32G056800.1	Ceric.32G056800	CriCHI5	III	OG6	CGTCA-motif	1611	1616	cis-acting regulatory element involved in the MeJA-responsiveness
Ceratopteris richardii	Ceric.32G056800.1	Ceric.32G056800	CriCHI5	III	OG6	CGTCA-motif	1733	1738	cis-acting regulatory element involved in the MeJA-responsiveness
Ceratopteris richardii	Ceric.32G056800.1	Ceric.32G056800	CriCHI5	III	OG6	CGTCA-motif	1925	1930	cis-acting regulatory element involved in the MeJA-responsiveness
Ceratopteris richardii	Ceric.32G056800.1	Ceric.32G056800	CriCHI5	III	OG6	TC-rich repeats	571	581	cis-acting element involved in defense and stress responsiveness
Ceratopteris richardii	Ceric.32G056800.1	Ceric.32G056800	CriCHI5	III	OG6	ACE	299	308	cis-acting element involved in light responsiveness
Ceratopteris richardii	Ceric.32G056800.1	Ceric.32G056800	CriCHI5	III	OG6	ABRE	301	306	cis-acting element involved in the abscisic acid responsiveness
Ceratopteris richardii	Ceric.32G056800.1	Ceric.32G056800	CriCHI5	III	OG6	ABRE	1540	1545	cis-acting element involved in the abscisic acid responsiveness
Ceratopteris richardii	Ceric.32G056800.1	Ceric.32G056800	CriCHI5	III	OG6	ABRE	1613	1618	cis-acting element involved in the abscisic acid responsiveness
Ceratopteris richardii	Ceric.32G056800.1	Ceric.32G056800	CriCHI5	III	OG6	ABRE	1751	1756	cis-acting element involved in the abscisic acid responsiveness
Ceratopteris richardii	Ceric.32G056800.1	Ceric.32G056800	CriCHI5	III	OG6	ABRE	1782	1788	cis-acting element involved in the abscisic acid responsiveness
Ceratopteris richardii	Ceric.32G056800.1	Ceric.32G056800	CriCHI5	III	OG6	ABRE	1783	1788	cis-acting element involved in the abscisic acid responsiveness
Ceratopteris richardii	Ceric.32G056800.1	Ceric.32G056800	CriCHI5	III	OG6	ABRE	1841	1846	cis-acting element involved in the abscisic acid responsiveness
Ceratopteris richardii	Ceric.32G056800.1	Ceric.32G056800	CriCHI5	III	OG6	ABRE	1923	1928	cis-acting element involved in the abscisic acid responsiveness
Ceratopteris richardii	Ceric.32G072000.1	Ceric.32G072000	CriCHI6	III	OG2	TCA-element	611	620	cis-acting element involved in salicylic acid responsiveness
Ceratopteris richardii	Ceric.32G072000.1	Ceric.32G072000	CriCHI6	III	OG2	TCA-element	697	706	cis-acting element involved in salicylic acid responsiveness
Ceratopteris richardii	Ceric.32G072000.1	Ceric.32G072000	CriCHI6	III	OG2	TCA-element	782	791	cis-acting element involved in salicylic acid responsiveness
Ceratopteris richardii	Ceric.32G072000.1	Ceric.32G072000	CriCHI6	III	OG2	Gap-box	669	678.5	part of a light responsive element
Ceratopteris richardii	Ceric.32G072000.1	Ceric.32G072000	CriCHI6	III	OG2	ARE	413	419	cis-acting regulatory element essential for the anaerobic induction
Ceratopteris richardii	Ceric.32G072000.1	Ceric.32G072000	CriCHI6	III	OG2	ARE	662	668	cis-acting regulatory element essential for the anaerobic induction
Ceratopteris richardii	Ceric.32G072000.1	Ceric.32G072000	CriCHI6	III	OG2	ARE	789	795	cis-acting regulatory element essential for the anaerobic induction
Ceratopteris richardii	Ceric.32G072000.1	Ceric.32G072000	CriCHI6	III	OG2	ARE	1740	1746	cis-acting regulatory element essential for the anaerobic induction
Ceratopteris richardii	Ceric.32G072000.1	Ceric.32G072000	CriCHI6	III	OG2	GT1-motif	1783	1789	light responsive element
Ceratopteris richardii	Ceric.32G072000.1	Ceric.32G072000	CriCHI6	III	OG2	WUN-motif	1499	1508	wound-responsive element
Ceratopteris richardii	Ceric.32G072000.1	Ceric.32G072000	CriCHI6	III	OG2	HD-Zip 1	1183	1191	element involved in differentiation of the palisade mesophyll cells
Ceratopteris richardii	Ceric.32G072000.1	Ceric.32G072000	CriCHI6	III	OG2	O2-site	1839	1847	cis-acting regulatory element involved in zein metabolism regulation
Ceratopteris richardii	Ceric.32G072000.1	Ceric.32G072000	CriCHI6	III	OG2	GARE-motif	1862	1869	gibberellin-responsive element
Ceratopteris richardii	Ceric.32G072000.1	Ceric.32G072000	CriCHI6	III	OG2	chs-CMA1a	1819	1827	part of a light responsive element
Ceratopteris richardii	Ceric.32G072000.1	Ceric.32G072000	CriCHI6	III	OG2	P-box	1059	1066	gibberellin-responsive element
Ceratopteris richardii	Ceric.32G072000.1	Ceric.32G072000	CriCHI6	III	OG2	Box 4	645	651	part of a conserved DNA module involved in light responsiveness
Ceratopteris richardii	Ceric.32G072000.1	Ceric.32G072000	CriCHI6	III	OG2	3-AF1 binding site	1232	1242	light responsive element
Ceratopteris richardii	Ceric.32G072000.1	Ceric.32G072000	CriCHI6	III	OG2	3-AF1 binding site	1503	1514	light responsive element
Ceratopteris richardii	Ceric.33G035400.1	Ceric.33G035400	CriCHI7	I	OG1	AE-box	1953	1961	part of a module for light response
Ceratopteris richardii	Ceric.33G035400.1	Ceric.33G035400	CriCHI7	I	OG1	GARE-motif	1823	1830	gibberellin-responsive element
Ceratopteris richardii	Ceric.33G035400.1	Ceric.33G035400	CriCHI7	I	OG1	O2-site	1390	1399	cis-acting regulatory element involved in zein metabolism regulation
Ceratopteris richardii	Ceric.33G035400.1	Ceric.33G035400	CriCHI7	I	OG1	chs-CMA2a	407	415	part of a light responsive element
Ceratopteris richardii	Ceric.33G035400.1	Ceric.33G035400	CriCHI7	I	OG1	chs-CMA2a	914	922	part of a light responsive element
Ceratopteris richardii	Ceric.33G035400.1	Ceric.33G035400	CriCHI7	I	OG1	TGA-element	1832	1838	auxin-responsive element
Ceratopteris richardii	Ceric.33G035400.1	Ceric.33G035400	CriCHI7	I	OG1	LTR	1960	1966	cis-acting element involved in low-temperature responsiveness
Ceratopteris richardii	Ceric.33G035400.1	Ceric.33G035400	CriCHI7	I	OG1	Box 4	930	936	part of a conserved DNA module involved in light responsiveness
Ceratopteris richardii	Ceric.33G035400.1	Ceric.33G035400	CriCHI7	I	OG1	P-box	1946	1953	gibberellin-responsive element
Ceratopteris richardii	Ceric.33G035400.1	Ceric.33G035400	CriCHI7	I	OG1	TCT-motif	827	833	part of a light responsive element
Ceratopteris richardii	Ceric.33G035400.1	Ceric.33G035400	CriCHI7	I	OG1	TCT-motif	1357	1363	part of a light responsive element
Ceratopteris richardii	Ceric.33G035400.1	Ceric.33G035400	CriCHI7	I	OG1	ACE	1570	1579	cis-acting element involved in light responsiveness
Ceratopteris richardii	Ceric.33G035400.1	Ceric.33G035400	CriCHI7	I	OG1	TCA-element	1474	1483	cis-acting element involved in salicylic acid responsiveness
Ceratopteris richardii	Ceric.33G035400.1	Ceric.33G035400	CriCHI7	I	OG1	MRE	592	599	MYB binding site involved in light responsiveness
Ceratopteris richardii	Ceric.33G035400.1	Ceric.33G035400	CriCHI7	I	OG1	ARE	881	887	cis-acting regulatory element essential for the anaerobic induction
Ceratopteris richardii	Ceric.33G035400.1	Ceric.33G035400	CriCHI7	I	OG1	ARE	1247	1253	cis-acting regulatory element essential for the anaerobic induction
Ceratopteris richardii	Ceric.33G035400.1	Ceric.33G035400	CriCHI7	I	OG1	TATC-box	1877	1884	cis-acting element involved in gibberellin-responsiveness
Ceratopteris richardii	Ceric.37G007100.1	Ceric.37G007100	CriCHI8	III	OG4	TCT-motif	677	683	part of a light responsive element
Ceratopteris richardii	Ceric.37G007100.1	Ceric.37G007100	CriCHI8	III	OG4	TCT-motif	889	895	part of a light responsive element
Ceratopteris richardii	Ceric.37G007100.1	Ceric.37G007100	CriCHI8	III	OG4	GATA-motif	1927	1934	part of a light responsive element
Ceratopteris richardii	Ceric.37G007100.1	Ceric.37G007100	CriCHI8	III	OG4	GA-motif	814	822	part of a light responsive element
Ceratopteris richardii	Ceric.37G007100.1	Ceric.37G007100	CriCHI8	III	OG4	LAMP-element	189	198	part of a light responsive element
Ceratopteris richardii	Ceric.37G007100.1	Ceric.37G007100	CriCHI8	III	OG4	AE-box	961	969	part of a module for light response
Ceratopteris richardii	Ceric.37G007100.1	Ceric.37G007100	CriCHI8	III	OG4	TCCC-motif	778	785	part of a light responsive element
Ceratopteris richardii	Ceric.37G007100.1	Ceric.37G007100	CriCHI8	III	OG4	G-box	1328	1334	cis-acting regulatory element involved in light responsiveness
Ceratopteris richardii	Ceric.37G007100.1	Ceric.37G007100	CriCHI8	III	OG4	G-box	1358	1364	cis-acting regulatory element involved in light responsiveness
Ceratopteris richardii	Ceric.37G007100.1	Ceric.37G007100	CriCHI8	III	OG4	G-box	1490	1496	cis-acting regulatory element involved in light responsiveness
Ceratopteris richardii	Ceric.37G007100.1	Ceric.37G007100	CriCHI8	III	OG4	G-box	1496	1502	cis-acting regulatory element involved in light responsiveness
Ceratopteris richardii	Ceric.37G007100.1	Ceric.37G007100	CriCHI8	III	OG4	GARE-motif	1674	1681	gibberellin-responsive element
Ceratopteris richardii	Ceric.37G007100.1	Ceric.37G007100	CriCHI8	III	OG4	GARE-motif	1710	1717	gibberellin-responsive element
Ceratopteris richardii	Ceric.37G007100.1	Ceric.37G007100	CriCHI8	III	OG4	ABRE	1036	1041	cis-acting element involved in the abscisic acid responsiveness
Ceratopteris richardii	Ceric.37G007100.1	Ceric.37G007100	CriCHI8	III	OG4	ABRE	1328	1334	cis-acting element involved in the abscisic acid responsiveness
Ceratopteris richardii	Ceric.37G007100.1	Ceric.37G007100	CriCHI8	III	OG4	ABRE	1329	1334	cis-acting element involved in the abscisic acid responsiveness
Ceratopteris richardii	Ceric.37G007100.1	Ceric.37G007100	CriCHI8	III	OG4	ABRE	1358	1364	cis-acting element involved in the abscisic acid responsiveness
Ceratopteris richardii	Ceric.37G007100.1	Ceric.37G007100	CriCHI8	III	OG4	ABRE	1359	1364	cis-acting element involved in the abscisic acid responsiveness
Ceratopteris richardii	Ceric.37G007100.1	Ceric.37G007100	CriCHI8	III	OG4	ABRE	1488	1497	cis-acting element involved in the abscisic acid responsiveness
Ceratopteris richardii	Ceric.37G007100.1	Ceric.37G007100	CriCHI8	III	OG4	ABRE	1490	1496	cis-acting element involved in the abscisic acid responsiveness
Ceratopteris richardii	Ceric.37G007100.1	Ceric.37G007100	CriCHI8	III	OG4	ABRE	1491	1496	cis-acting element involved in the abscisic acid responsiveness
Ceratopteris richardii	Ceric.37G007100.1	Ceric.37G007100	CriCHI8	III	OG4	ABRE	1496	1502	cis-acting element involved in the abscisic acid responsiveness
Ceratopteris richardii	Ceric.37G007100.1	Ceric.37G007100	CriCHI8	III	OG4	ABRE	1497	1502	cis-acting element involved in the abscisic acid responsiveness
Ceratopteris richardii	Ceric.37G007100.1	Ceric.37G007100	CriCHI8	III	OG4	ARE	34	40	cis-acting regulatory element essential for the anaerobic induction
Ceratopteris richardii	Ceric.37G007100.1	Ceric.37G007100	CriCHI8	III	OG4	ARE	1883	1889	cis-acting regulatory element essential for the anaerobic induction
Ceratopteris richardii	Ceric.37G007100.1	Ceric.37G007100	CriCHI8	III	OG4	ARE	1977	1983	cis-acting regulatory element essential for the anaerobic induction
Ceratopteris richardii	Ceric.37G007100.1	Ceric.37G007100	CriCHI8	III	OG4	G-box	1036	1042	cis-acting regulatory element involved in light responsiveness
Ceratopteris richardii	Ceric.37G007100.1	Ceric.37G007100	CriCHI8	III	OG4	G-box	1328	1334	cis-acting regulatory element involved in light responsiveness
Ceratopteris richardii	Ceric.37G007100.1	Ceric.37G007100	CriCHI8	III	OG4	G-box	1358	1364	cis-acting regulatory element involved in light responsiveness
Ceratopteris richardii	Ceric.37G007100.1	Ceric.37G007100	CriCHI8	III	OG4	G-box	1490	1496	cis-acting regulatory element involved in light responsiveness
Ceratopteris richardii	Ceric.37G007100.1	Ceric.37G007100	CriCHI8	III	OG4	G-box	1496	1502	cis-acting regulatory element involved in light responsiveness
Ceratopteris richardii	Ceric.37G007100.1	Ceric.37G007100	CriCHI8	III	OG4	TC-rich repeats	1755	1764	cis-acting element involved in defense and stress responsiveness
Ceratopteris richardii	Ceric.37G007100.1	Ceric.37G007100	CriCHI8	III	OG4	RY-element	1304	1312	cis-acting regulatory element involved in seed-specific regulation
Ceratopteris richardii	Ceric.37G007100.1	Ceric.37G007100	CriCHI8	III	OG4	RY-element	1308	1316	cis-acting regulatory element involved in seed-specific regulation
Ceratopteris richardii	Ceric.37G007100.1	Ceric.37G007100	CriCHI8	III	OG4	RY-element	1312	1320	cis-acting regulatory element involved in seed-specific regulation
Ceratopteris richardii	Ceric.37G007100.1	Ceric.37G007100	CriCHI8	III	OG4	RY-element	1344	1352	cis-acting regulatory element involved in seed-specific regulation
Selaginella moellendorffii	EFJ05545	SELMODRAFT_136990	SmCHI8	III	OG4	CGTCA-motif	739	744	cis-acting regulatory element involved in the MeJA-responsiveness
Selaginella moellendorffii	EFJ05545	SELMODRAFT_136990	SmCHI8	III	OG4	CGTCA-motif	754	759	cis-acting regulatory element involved in the MeJA-responsiveness
Selaginella moellendorffii	EFJ05545	SELMODRAFT_136990	SmCHI8	III	OG4	CGTCA-motif	1066	1071	cis-acting regulatory element involved in the MeJA-responsiveness
Selaginella moellendorffii	EFJ05545	SELMODRAFT_136990	SmCHI8	III	OG4	G-box	321	327	cis-acting regulatory element involved in light responsiveness
Selaginella moellendorffii	EFJ05545	SELMODRAFT_136990	SmCHI8	III	OG4	G-box	342	348	cis-acting regulatory element involved in light responsiveness
Selaginella moellendorffii	EFJ05545	SELMODRAFT_136990	SmCHI8	III	OG4	G-box	627	633	cis-acting regulatory element involved in light responsiveness
Selaginella moellendorffii	EFJ05545	SELMODRAFT_136990	SmCHI8	III	OG4	G-box	759	765	cis-acting regulatory element involved in light responsiveness
Selaginella moellendorffii	EFJ05545	SELMODRAFT_136990	SmCHI8	III	OG4	G-box	1364	1370	cis-acting regulatory element involved in light responsiveness
Selaginella moellendorffii	EFJ05545	SELMODRAFT_136990	SmCHI8	III	OG4	G-box	1376	1382	cis-acting regulatory element involved in light responsiveness
Selaginella moellendorffii	EFJ05545	SELMODRAFT_136990	SmCHI8	III	OG4	ARE	266	272	cis-acting regulatory element essential for the anaerobic induction
Selaginella moellendorffii	EFJ05545	SELMODRAFT_136990	SmCHI8	III	OG4	ARE	1838	1844	cis-acting regulatory element essential for the anaerobic induction
Selaginella moellendorffii	EFJ05545	SELMODRAFT_136990	SmCHI8	III	OG4	ARE	1971	1977	cis-acting regulatory element essential for the anaerobic induction
Selaginella moellendorffii	EFJ05545	SELMODRAFT_136990	SmCHI8	III	OG4	ABRE	342	347	cis-acting element involved in the abscisic acid responsiveness
Selaginella moellendorffii	EFJ05545	SELMODRAFT_136990	SmCHI8	III	OG4	ABRE	628	633	cis-acting element involved in the abscisic acid responsiveness
Selaginella moellendorffii	EFJ05545	SELMODRAFT_136990	SmCHI8	III	OG4	ABRE	760	765	cis-acting element involved in the abscisic acid responsiveness
Selaginella moellendorffii	EFJ05545	SELMODRAFT_136990	SmCHI8	III	OG4	ABRE	818	823	cis-acting element involved in the abscisic acid responsiveness
Selaginella moellendorffii	EFJ05545	SELMODRAFT_136990	SmCHI8	III	OG4	ABRE	879	886	cis-acting element involved in the abscisic acid responsiveness
Selaginella moellendorffii	EFJ05545	SELMODRAFT_136990	SmCHI8	III	OG4	ABRE	1365	1370	cis-acting element involved in the abscisic acid responsiveness
Selaginella moellendorffii	EFJ05545	SELMODRAFT_136990	SmCHI8	III	OG4	ABRE	1377	1382	cis-acting element involved in the abscisic acid responsiveness
Selaginella moellendorffii	EFJ05545	SELMODRAFT_136990	SmCHI8	III	OG4	G-box	818	824	cis-acting regulatory element involved in light responsiveness
Selaginella moellendorffii	EFJ05545	SELMODRAFT_136990	SmCHI8	III	OG4	AE-box	1981	1989	part of a module for light response
Selaginella moellendorffii	EFJ05545	SELMODRAFT_136990	SmCHI8	III	OG4	MBS	1454	1460	MYB binding site involved in drought-inducibility
Selaginella moellendorffii	EFJ05545	SELMODRAFT_136990	SmCHI8	III	OG4	LTR	681	687	cis-acting element involved in low-temperature responsiveness
Selaginella moellendorffii	EFJ05545	SELMODRAFT_136990	SmCHI8	III	OG4	LTR	1017	1023	cis-acting element involved in low-temperature responsiveness
Selaginella moellendorffii	EFJ05545	SELMODRAFT_136990	SmCHI8	III	OG4	GC-motif	52	58	enhancer-like element involved in anoxic specific inducibility
Selaginella moellendorffii	EFJ05545	SELMODRAFT_136990	SmCHI8	III	OG4	GC-motif	1107	1113	enhancer-like element involved in anoxic specific inducibility
Selaginella moellendorffii	EFJ05545	SELMODRAFT_136990	SmCHI8	III	OG4	TGACG-motif	739	744	cis-acting regulatory element involved in the MeJA-responsiveness
Selaginella moellendorffii	EFJ05545	SELMODRAFT_136990	SmCHI8	III	OG4	TGACG-motif	754	759	cis-acting regulatory element involved in the MeJA-responsiveness
Selaginella moellendorffii	EFJ05545	SELMODRAFT_136990	SmCHI8	III	OG4	TGACG-motif	1066	1071	cis-acting regulatory element involved in the MeJA-responsiveness
Selaginella moellendorffii	EFJ05545	SELMODRAFT_136990	SmCHI8	III	OG4	TCT-motif	1489	1495	part of a light responsive element
Selaginella moellendorffii	EFJ05545	SELMODRAFT_136990	SmCHI8	III	OG4	TCT-motif	1774	1780	part of a light responsive element
Selaginella moellendorffii	EFJ10696	SELMODRAFT_447240	SmCHI7	IV	OG3	G-box	374	380	cis-acting regulatory element involved in light responsiveness
Selaginella moellendorffii	EFJ10696	SELMODRAFT_447240	SmCHI7	IV	OG3	TGACG-motif	646	651	cis-acting regulatory element involved in the MeJA-responsiveness
Selaginella moellendorffii	EFJ10696	SELMODRAFT_447240	SmCHI7	IV	OG3	TGACG-motif	654	659	cis-acting regulatory element involved in the MeJA-responsiveness
Selaginella moellendorffii	EFJ10696	SELMODRAFT_447240	SmCHI7	IV	OG3	TGACG-motif	1012	1017	cis-acting regulatory element involved in the MeJA-responsiveness
Selaginella moellendorffii	EFJ10696	SELMODRAFT_447240	SmCHI7	IV	OG3	TCT-motif	108	114	part of a light responsive element
Selaginella moellendorffii	EFJ10696	SELMODRAFT_447240	SmCHI7	IV	OG3	TCT-motif	279	285	part of a light responsive element
Selaginella moellendorffii	EFJ10696	SELMODRAFT_447240	SmCHI7	IV	OG3	TCT-motif	1222	1228	part of a light responsive element
Selaginella moellendorffii	EFJ10696	SELMODRAFT_447240	SmCHI7	IV	OG3	GATA-motif	1692	1699	part of a light responsive element
Selaginella moellendorffii	EFJ10696	SELMODRAFT_447240	SmCHI7	IV	OG3	CAT-box	181	187	cis-acting regulatory element related to meristem expression
Selaginella moellendorffii	EFJ10696	SELMODRAFT_447240	SmCHI7	IV	OG3	TC-rich repeats	108	117	cis-acting element involved in defense and stress responsiveness
Selaginella moellendorffii	EFJ10696	SELMODRAFT_447240	SmCHI7	IV	OG3	G-box	652	658	cis-acting regulatory element involved in light responsiveness
Selaginella moellendorffii	EFJ10696	SELMODRAFT_447240	SmCHI7	IV	OG3	G-box	1960	1966	cis-acting regulatory element involved in light responsiveness
Selaginella moellendorffii	EFJ10696	SELMODRAFT_447240	SmCHI7	IV	OG3	Box II	304	313	part of a light responsive element
Selaginella moellendorffii	EFJ10696	SELMODRAFT_447240	SmCHI7	IV	OG3	CGTCA-motif	646	651	cis-acting regulatory element involved in the MeJA-responsiveness
Selaginella moellendorffii	EFJ10696	SELMODRAFT_447240	SmCHI7	IV	OG3	CGTCA-motif	654	659	cis-acting regulatory element involved in the MeJA-responsiveness
Selaginella moellendorffii	EFJ10696	SELMODRAFT_447240	SmCHI7	IV	OG3	CGTCA-motif	1012	1017	cis-acting regulatory element involved in the MeJA-responsiveness
Selaginella moellendorffii	EFJ10696	SELMODRAFT_447240	SmCHI7	IV	OG3	TCA-element	1284	1293	cis-acting element involved in salicylic acid responsiveness
Selaginella moellendorffii	EFJ10696	SELMODRAFT_447240	SmCHI7	IV	OG3	ARE	423	429	cis-acting regulatory element essential for the anaerobic induction
Selaginella moellendorffii	EFJ10696	SELMODRAFT_447240	SmCHI7	IV	OG3	ARE	609	615	cis-acting regulatory element essential for the anaerobic induction
Selaginella moellendorffii	EFJ10696	SELMODRAFT_447240	SmCHI7	IV	OG3	ARE	666	672	cis-acting regulatory element essential for the anaerobic induction
Selaginella moellendorffii	EFJ10696	SELMODRAFT_447240	SmCHI7	IV	OG3	ARE	1121	1127	cis-acting regulatory element essential for the anaerobic induction
Selaginella moellendorffii	EFJ10696	SELMODRAFT_447240	SmCHI7	IV	OG3	ARE	1201	1207	cis-acting regulatory element essential for the anaerobic induction
Selaginella moellendorffii	EFJ10696	SELMODRAFT_447240	SmCHI7	IV	OG3	ARE	1298	1304	cis-acting regulatory element essential for the anaerobic induction
Selaginella moellendorffii	EFJ10696	SELMODRAFT_447240	SmCHI7	IV	OG3	ARE	1679	1685	cis-acting regulatory element essential for the anaerobic induction
Selaginella moellendorffii	EFJ10696	SELMODRAFT_447240	SmCHI7	IV	OG3	ABRE	375	380	cis-acting element involved in the abscisic acid responsiveness
Selaginella moellendorffii	EFJ10696	SELMODRAFT_447240	SmCHI7	IV	OG3	ABRE	652	657	cis-acting element involved in the abscisic acid responsiveness
Selaginella moellendorffii	EFJ10696	SELMODRAFT_447240	SmCHI7	IV	OG3	ABRE	1961	1966	cis-acting element involved in the abscisic acid responsiveness
Selaginella moellendorffii	EFJ11545	SELMODRAFT_125981	SmCHI6	III	OG2	G-box	1195	1201	cis-acting regulatory element involved in light responsiveness
Selaginella moellendorffii	EFJ11545	SELMODRAFT_125981	SmCHI6	III	OG2	P-box	108	115	gibberellin-responsive element
Selaginella moellendorffii	EFJ11545	SELMODRAFT_125981	SmCHI6	III	OG2	TCT-motif	1189	1195	part of a light responsive element
Selaginella moellendorffii	EFJ11545	SELMODRAFT_125981	SmCHI6	III	OG2	TCT-motif	1818	1824	part of a light responsive element
Selaginella moellendorffii	EFJ11545	SELMODRAFT_125981	SmCHI6	III	OG2	TCT-motif	1938	1944	part of a light responsive element
Selaginella moellendorffii	EFJ11545	SELMODRAFT_125981	SmCHI6	III	OG2	TCT-motif	1987	1993	part of a light responsive element
Selaginella moellendorffii	EFJ11545	SELMODRAFT_125981	SmCHI6	III	OG2	GATA-motif	1492	1499	part of a light responsive element
Selaginella moellendorffii	EFJ11545	SELMODRAFT_125981	SmCHI6	III	OG2	3-AF1 binding site	1135	1145	light responsive element
Selaginella moellendorffii	EFJ11545	SELMODRAFT_125981	SmCHI6	III	OG2	G-box	1194	1202	cis-acting regulatory element involved in light responsiveness
Selaginella moellendorffii	EFJ11545	SELMODRAFT_125981	SmCHI6	III	OG2	G-box	1195	1201	cis-acting regulatory element involved in light responsiveness
Selaginella moellendorffii	EFJ11545	SELMODRAFT_125981	SmCHI6	III	OG2	TC-rich repeats	1934	1943	cis-acting element involved in defense and stress responsiveness
Selaginella moellendorffii	EFJ11545	SELMODRAFT_125981	SmCHI6	III	OG2	ACE	1193	1202	cis-acting element involved in light responsiveness
Selaginella moellendorffii	EFJ11545	SELMODRAFT_125981	SmCHI6	III	OG2	Sp1	1364	1370	light responsive element
Selaginella moellendorffii	EFJ11545	SELMODRAFT_125981	SmCHI6	III	OG2	ABRE	1193	1202	cis-acting element involved in the abscisic acid responsiveness
Selaginella moellendorffii	EFJ11545	SELMODRAFT_125981	SmCHI6	III	OG2	ABRE	1195	1201	cis-acting element involved in the abscisic acid responsiveness
Selaginella moellendorffii	EFJ11545	SELMODRAFT_125981	SmCHI6	III	OG2	ABRE	1196	1201	cis-acting element involved in the abscisic acid responsiveness
Selaginella moellendorffii	EFJ11545	SELMODRAFT_125981	SmCHI6	III	OG2	ARE	1712	1718	cis-acting regulatory element essential for the anaerobic induction
Selaginella moellendorffii	EFJ18274	SELMODRAFT_444624	SmCHI5	I	OG1	ACA-motif	182	194	part of gapA in (gapA-CMA1) involved with light responsiveness
Selaginella moellendorffii	EFJ18274	SELMODRAFT_444624	SmCHI5	I	OG1	GATA-motif	80	89	part of a light responsive element
Selaginella moellendorffii	EFJ18274	SELMODRAFT_444624	SmCHI5	I	OG1	CAT-box	265	271	cis-acting regulatory element related to meristem expression
Selaginella moellendorffii	EFJ18274	SELMODRAFT_444624	SmCHI5	I	OG1	Box 4	1991	1997	part of a conserved DNA module involved in light responsiveness
Selaginella moellendorffii	EFJ18274	SELMODRAFT_444624	SmCHI5	I	OG1	TGACG-motif	450	455	cis-acting regulatory element involved in the MeJA-responsiveness
Selaginella moellendorffii	EFJ18274	SELMODRAFT_444624	SmCHI5	I	OG1	TGACG-motif	681	686	cis-acting regulatory element involved in the MeJA-responsiveness
Selaginella moellendorffii	EFJ18274	SELMODRAFT_444624	SmCHI5	I	OG1	TGACG-motif	984	989	cis-acting regulatory element involved in the MeJA-responsiveness
Selaginella moellendorffii	EFJ18274	SELMODRAFT_444624	SmCHI5	I	OG1	TGACG-motif	1476	1481	cis-acting regulatory element involved in the MeJA-responsiveness
Selaginella moellendorffii	EFJ18274	SELMODRAFT_444624	SmCHI5	I	OG1	TGACG-motif	1611	1616	cis-acting regulatory element involved in the MeJA-responsiveness
Selaginella moellendorffii	EFJ18274	SELMODRAFT_444624	SmCHI5	I	OG1	TGACG-motif	1930	1935	cis-acting regulatory element involved in the MeJA-responsiveness
Selaginella moellendorffii	EFJ18274	SELMODRAFT_444624	SmCHI5	I	OG1	LTR	58	64	cis-acting element involved in low-temperature responsiveness
Selaginella moellendorffii	EFJ18274	SELMODRAFT_444624	SmCHI5	I	OG1	MBS	1780	1786	MYB binding site involved in drought-inducibility
Selaginella moellendorffii	EFJ18274	SELMODRAFT_444624	SmCHI5	I	OG1	MBS	1845	1851	MYB binding site involved in drought-inducibility
Selaginella moellendorffii	EFJ18274	SELMODRAFT_444624	SmCHI5	I	OG1	TGA-element	1790	1796	auxin-responsive element
Selaginella moellendorffii	EFJ18274	SELMODRAFT_444624	SmCHI5	I	OG1	O2-site	586	595	cis-acting regulatory element involved in zein metabolism regulation
Selaginella moellendorffii	EFJ18274	SELMODRAFT_444624	SmCHI5	I	OG1	GARE-motif	143	150	gibberellin-responsive element
Selaginella moellendorffii	EFJ18274	SELMODRAFT_444624	SmCHI5	I	OG1	TCCC-motif	87	94	part of a light responsive element
Selaginella moellendorffii	EFJ18274	SELMODRAFT_444624	SmCHI5	I	OG1	TCCC-motif	1218	1225	part of a light responsive element
Selaginella moellendorffii	EFJ18274	SELMODRAFT_444624	SmCHI5	I	OG1	ABRE	613	618	cis-acting element involved in the abscisic acid responsiveness
Selaginella moellendorffii	EFJ18274	SELMODRAFT_444624	SmCHI5	I	OG1	ABRE	1651	1656	cis-acting element involved in the abscisic acid responsiveness
Selaginella moellendorffii	EFJ18274	SELMODRAFT_444624	SmCHI5	I	OG1	Sp1	551	557	light responsive element
Selaginella moellendorffii	EFJ18274	SELMODRAFT_444624	SmCHI5	I	OG1	TCA-element	807	816	cis-acting element involved in salicylic acid responsiveness
Selaginella moellendorffii	EFJ18274	SELMODRAFT_444624	SmCHI5	I	OG1	TCA-element	895	904	cis-acting element involved in salicylic acid responsiveness
Selaginella moellendorffii	EFJ18274	SELMODRAFT_444624	SmCHI5	I	OG1	CGTCA-motif	450	455	cis-acting regulatory element involved in the MeJA-responsiveness
Selaginella moellendorffii	EFJ18274	SELMODRAFT_444624	SmCHI5	I	OG1	CGTCA-motif	681	686	cis-acting regulatory element involved in the MeJA-responsiveness
Selaginella moellendorffii	EFJ18274	SELMODRAFT_444624	SmCHI5	I	OG1	CGTCA-motif	984	989	cis-acting regulatory element involved in the MeJA-responsiveness
Selaginella moellendorffii	EFJ18274	SELMODRAFT_444624	SmCHI5	I	OG1	CGTCA-motif	1476	1481	cis-acting regulatory element involved in the MeJA-responsiveness
Selaginella moellendorffii	EFJ18274	SELMODRAFT_444624	SmCHI5	I	OG1	CGTCA-motif	1611	1616	cis-acting regulatory element involved in the MeJA-responsiveness
Selaginella moellendorffii	EFJ18274	SELMODRAFT_444624	SmCHI5	I	OG1	CGTCA-motif	1930	1935	cis-acting regulatory element involved in the MeJA-responsiveness
Selaginella moellendorffii	EFJ18274	SELMODRAFT_444624	SmCHI5	I	OG1	G-box	613	619	cis-acting regulatory element involved in light responsiveness
Selaginella moellendorffii	EFJ18274	SELMODRAFT_444624	SmCHI5	I	OG1	G-box	730	736	cis-acting regulatory element involved in light responsiveness
Selaginella moellendorffii	EFJ18274	SELMODRAFT_444624	SmCHI5	I	OG1	G-box	1651	1657	cis-acting regulatory element involved in light responsiveness
Selaginella moellendorffii	EFJ18274	SELMODRAFT_444624	SmCHI5	I	OG1	ACE	638	647	cis-acting element involved in light responsiveness
Selaginella moellendorffii	EFJ18274	SELMODRAFT_444624	SmCHI5	I	OG1	ACE	1616	1625	cis-acting element involved in light responsiveness
Selaginella moellendorffii	EFJ18934	SELMODRAFT_112032	SmCHI4	III	OG2	TC-rich repeats	1934	1943	cis-acting element involved in defense and stress responsiveness
Selaginella moellendorffii	EFJ18934	SELMODRAFT_112032	SmCHI4	III	OG2	CGTCA-motif	410	415	cis-acting regulatory element involved in the MeJA-responsiveness
Selaginella moellendorffii	EFJ18934	SELMODRAFT_112032	SmCHI4	III	OG2	G-box	408	414	cis-acting regulatory element involved in light responsiveness
Selaginella moellendorffii	EFJ18934	SELMODRAFT_112032	SmCHI4	III	OG2	G-box	1192	1200	cis-acting regulatory element involved in light responsiveness
Selaginella moellendorffii	EFJ18934	SELMODRAFT_112032	SmCHI4	III	OG2	G-box	1193	1199	cis-acting regulatory element involved in light responsiveness
Selaginella moellendorffii	EFJ18934	SELMODRAFT_112032	SmCHI4	III	OG2	ARE	1712	1718	cis-acting regulatory element essential for the anaerobic induction
Selaginella moellendorffii	EFJ18934	SELMODRAFT_112032	SmCHI4	III	OG2	Sp1	956	962	light responsive element
Selaginella moellendorffii	EFJ18934	SELMODRAFT_112032	SmCHI4	III	OG2	Sp1	1364	1370	light responsive element
Selaginella moellendorffii	EFJ18934	SELMODRAFT_112032	SmCHI4	III	OG2	ABRE	408	413	cis-acting element involved in the abscisic acid responsiveness
Selaginella moellendorffii	EFJ18934	SELMODRAFT_112032	SmCHI4	III	OG2	ABRE	1193	1199	cis-acting element involved in the abscisic acid responsiveness
Selaginella moellendorffii	EFJ18934	SELMODRAFT_112032	SmCHI4	III	OG2	ABRE	1194	1199	cis-acting element involved in the abscisic acid responsiveness
Selaginella moellendorffii	EFJ18934	SELMODRAFT_112032	SmCHI4	III	OG2	G-box	1193	1199	cis-acting regulatory element involved in light responsiveness
Selaginella moellendorffii	EFJ18934	SELMODRAFT_112032	SmCHI4	III	OG2	TGACG-motif	410	415	cis-acting regulatory element involved in the MeJA-responsiveness
Selaginella moellendorffii	EFJ18934	SELMODRAFT_112032	SmCHI4	III	OG2	3-AF1 binding site	1133	1143	light responsive element
Selaginella moellendorffii	EFJ18934	SELMODRAFT_112032	SmCHI4	III	OG2	GATA-motif	1492	1499	part of a light responsive element
Selaginella moellendorffii	EFJ18934	SELMODRAFT_112032	SmCHI4	III	OG2	P-box	93	100	gibberellin-responsive element
Selaginella moellendorffii	EFJ18934	SELMODRAFT_112032	SmCHI4	III	OG2	TCT-motif	1818	1824	part of a light responsive element
Selaginella moellendorffii	EFJ18934	SELMODRAFT_112032	SmCHI4	III	OG2	TCT-motif	1938	1944	part of a light responsive element
Selaginella moellendorffii	EFJ18934	SELMODRAFT_112032	SmCHI4	III	OG2	TCT-motif	1987	1993	part of a light responsive element
Selaginella moellendorffii	EFJ22013	SELMODRAFT_151616	SmCHI3	I	OG1	ABRE	656	661	cis-acting element involved in the abscisic acid responsiveness
Selaginella moellendorffii	EFJ22013	SELMODRAFT_151616	SmCHI3	I	OG1	ABRE	1646	1651	cis-acting element involved in the abscisic acid responsiveness
Selaginella moellendorffii	EFJ22013	SELMODRAFT_151616	SmCHI3	I	OG1	Sp1	594	600	light responsive element
Selaginella moellendorffii	EFJ22013	SELMODRAFT_151616	SmCHI3	I	OG1	TCA-element	850	859	cis-acting element involved in salicylic acid responsiveness
Selaginella moellendorffii	EFJ22013	SELMODRAFT_151616	SmCHI3	I	OG1	TCA-element	938	947	cis-acting element involved in salicylic acid responsiveness
Selaginella moellendorffii	EFJ22013	SELMODRAFT_151616	SmCHI3	I	OG1	CGTCA-motif	493	498	cis-acting regulatory element involved in the MeJA-responsiveness
Selaginella moellendorffii	EFJ22013	SELMODRAFT_151616	SmCHI3	I	OG1	CGTCA-motif	724	729	cis-acting regulatory element involved in the MeJA-responsiveness
Selaginella moellendorffii	EFJ22013	SELMODRAFT_151616	SmCHI3	I	OG1	CGTCA-motif	1027	1032	cis-acting regulatory element involved in the MeJA-responsiveness
Selaginella moellendorffii	EFJ22013	SELMODRAFT_151616	SmCHI3	I	OG1	CGTCA-motif	1471	1476	cis-acting regulatory element involved in the MeJA-responsiveness
Selaginella moellendorffii	EFJ22013	SELMODRAFT_151616	SmCHI3	I	OG1	CGTCA-motif	1606	1611	cis-acting regulatory element involved in the MeJA-responsiveness
Selaginella moellendorffii	EFJ22013	SELMODRAFT_151616	SmCHI3	I	OG1	CGTCA-motif	1813	1818	cis-acting regulatory element involved in the MeJA-responsiveness
Selaginella moellendorffii	EFJ22013	SELMODRAFT_151616	SmCHI3	I	OG1	G-box	656	662	cis-acting regulatory element involved in light responsiveness
Selaginella moellendorffii	EFJ22013	SELMODRAFT_151616	SmCHI3	I	OG1	G-box	773	779	cis-acting regulatory element involved in light responsiveness
Selaginella moellendorffii	EFJ22013	SELMODRAFT_151616	SmCHI3	I	OG1	G-box	1646	1652	cis-acting regulatory element involved in light responsiveness
Selaginella moellendorffii	EFJ22013	SELMODRAFT_151616	SmCHI3	I	OG1	ACE	681	690	cis-acting element involved in light responsiveness
Selaginella moellendorffii	EFJ22013	SELMODRAFT_151616	SmCHI3	I	OG1	ACA-motif	226	238	part of gapA in (gapA-CMA1) involved with light responsiveness
Selaginella moellendorffii	EFJ22013	SELMODRAFT_151616	SmCHI3	I	OG1	CAT-box	309	315	cis-acting regulatory element related to meristem expression
Selaginella moellendorffii	EFJ22013	SELMODRAFT_151616	SmCHI3	I	OG1	TCT-motif	1081	1087	part of a light responsive element
Selaginella moellendorffii	EFJ22013	SELMODRAFT_151616	SmCHI3	I	OG1	Box 4	1933	1939	part of a conserved DNA module involved in light responsiveness
Selaginella moellendorffii	EFJ22013	SELMODRAFT_151616	SmCHI3	I	OG1	TGACG-motif	493	498	cis-acting regulatory element involved in the MeJA-responsiveness
Selaginella moellendorffii	EFJ22013	SELMODRAFT_151616	SmCHI3	I	OG1	TGACG-motif	724	729	cis-acting regulatory element involved in the MeJA-responsiveness
Selaginella moellendorffii	EFJ22013	SELMODRAFT_151616	SmCHI3	I	OG1	TGACG-motif	1027	1032	cis-acting regulatory element involved in the MeJA-responsiveness
Selaginella moellendorffii	EFJ22013	SELMODRAFT_151616	SmCHI3	I	OG1	TGACG-motif	1471	1476	cis-acting regulatory element involved in the MeJA-responsiveness
Selaginella moellendorffii	EFJ22013	SELMODRAFT_151616	SmCHI3	I	OG1	TGACG-motif	1606	1611	cis-acting regulatory element involved in the MeJA-responsiveness
Selaginella moellendorffii	EFJ22013	SELMODRAFT_151616	SmCHI3	I	OG1	TGACG-motif	1813	1818	cis-acting regulatory element involved in the MeJA-responsiveness
Selaginella moellendorffii	EFJ22013	SELMODRAFT_151616	SmCHI3	I	OG1	MBS	1766	1772	MYB binding site involved in drought-inducibility
Selaginella moellendorffii	EFJ22013	SELMODRAFT_151616	SmCHI3	I	OG1	MBS	1816	1822	MYB binding site involved in drought-inducibility
Selaginella moellendorffii	EFJ22013	SELMODRAFT_151616	SmCHI3	I	OG1	TGA-element	1776	1782	auxin-responsive element
Selaginella moellendorffii	EFJ22013	SELMODRAFT_151616	SmCHI3	I	OG1	O2-site	629	638	cis-acting regulatory element involved in zein metabolism regulation
Selaginella moellendorffii	EFJ22013	SELMODRAFT_151616	SmCHI3	I	OG1	GARE-motif	187	194	gibberellin-responsive element
Selaginella moellendorffii	EFJ22013	SELMODRAFT_151616	SmCHI3	I	OG1	TCCC-motif	1261	1268	part of a light responsive element
Selaginella moellendorffii	EFJ25967	SELMODRAFT_97953	SmCHI2	III	OG4	G-box	170	176	cis-acting regulatory element involved in light responsiveness
Selaginella moellendorffii	EFJ25967	SELMODRAFT_97953	SmCHI2	III	OG4	G-box	455	461	cis-acting regulatory element involved in light responsiveness
Selaginella moellendorffii	EFJ25967	SELMODRAFT_97953	SmCHI2	III	OG4	G-box	587	593	cis-acting regulatory element involved in light responsiveness
Selaginella moellendorffii	EFJ25967	SELMODRAFT_97953	SmCHI2	III	OG4	G-box	1201	1207	cis-acting regulatory element involved in light responsiveness
Selaginella moellendorffii	EFJ25967	SELMODRAFT_97953	SmCHI2	III	OG4	CGTCA-motif	567	572	cis-acting regulatory element involved in the MeJA-responsiveness
Selaginella moellendorffii	EFJ25967	SELMODRAFT_97953	SmCHI2	III	OG4	CGTCA-motif	582	587	cis-acting regulatory element involved in the MeJA-responsiveness
Selaginella moellendorffii	EFJ25967	SELMODRAFT_97953	SmCHI2	III	OG4	CGTCA-motif	894	899	cis-acting regulatory element involved in the MeJA-responsiveness
Selaginella moellendorffii	EFJ25967	SELMODRAFT_97953	SmCHI2	III	OG4	ABRE	170	175	cis-acting element involved in the abscisic acid responsiveness
Selaginella moellendorffii	EFJ25967	SELMODRAFT_97953	SmCHI2	III	OG4	ABRE	456	461	cis-acting element involved in the abscisic acid responsiveness
Selaginella moellendorffii	EFJ25967	SELMODRAFT_97953	SmCHI2	III	OG4	ABRE	588	593	cis-acting element involved in the abscisic acid responsiveness
Selaginella moellendorffii	EFJ25967	SELMODRAFT_97953	SmCHI2	III	OG4	ABRE	646	651	cis-acting element involved in the abscisic acid responsiveness
Selaginella moellendorffii	EFJ25967	SELMODRAFT_97953	SmCHI2	III	OG4	ABRE	707	714	cis-acting element involved in the abscisic acid responsiveness
Selaginella moellendorffii	EFJ25967	SELMODRAFT_97953	SmCHI2	III	OG4	ABRE	1202	1207	cis-acting element involved in the abscisic acid responsiveness
Selaginella moellendorffii	EFJ25967	SELMODRAFT_97953	SmCHI2	III	OG4	ARE	94	100	cis-acting regulatory element essential for the anaerobic induction
Selaginella moellendorffii	EFJ25967	SELMODRAFT_97953	SmCHI2	III	OG4	ARE	1662	1668	cis-acting regulatory element essential for the anaerobic induction
Selaginella moellendorffii	EFJ25967	SELMODRAFT_97953	SmCHI2	III	OG4	ARE	1795	1801	cis-acting regulatory element essential for the anaerobic induction
Selaginella moellendorffii	EFJ25967	SELMODRAFT_97953	SmCHI2	III	OG4	GC-motif	935	941	enhancer-like element involved in anoxic specific inducibility
Selaginella moellendorffii	EFJ25967	SELMODRAFT_97953	SmCHI2	III	OG4	TGA-element	1921	1927	auxin-responsive element
Selaginella moellendorffii	EFJ25967	SELMODRAFT_97953	SmCHI2	III	OG4	LTR	509	515	cis-acting element involved in low-temperature responsiveness
Selaginella moellendorffii	EFJ25967	SELMODRAFT_97953	SmCHI2	III	OG4	LTR	845	851	cis-acting element involved in low-temperature responsiveness
Selaginella moellendorffii	EFJ25967	SELMODRAFT_97953	SmCHI2	III	OG4	MBS	1275	1281	MYB binding site involved in drought-inducibility
Selaginella moellendorffii	EFJ25967	SELMODRAFT_97953	SmCHI2	III	OG4	AE-box	1805	1813	part of a module for light response
Selaginella moellendorffii	EFJ25967	SELMODRAFT_97953	SmCHI2	III	OG4	G-box	646	652	cis-acting regulatory element involved in light responsiveness
Selaginella moellendorffii	EFJ25967	SELMODRAFT_97953	SmCHI2	III	OG4	TCT-motif	1598	1604	part of a light responsive element
Selaginella moellendorffii	EFJ25967	SELMODRAFT_97953	SmCHI2	III	OG4	CAT-box	1465	1471	cis-acting regulatory element related to meristem expression
Selaginella moellendorffii	EFJ25967	SELMODRAFT_97953	SmCHI2	III	OG4	TGACG-motif	567	572	cis-acting regulatory element involved in the MeJA-responsiveness
Selaginella moellendorffii	EFJ25967	SELMODRAFT_97953	SmCHI2	III	OG4	TGACG-motif	582	587	cis-acting regulatory element involved in the MeJA-responsiveness
Selaginella moellendorffii	EFJ25967	SELMODRAFT_97953	SmCHI2	III	OG4	TGACG-motif	894	899	cis-acting regulatory element involved in the MeJA-responsiveness
Selaginella moellendorffii	EFJ35745	SELMODRAFT_227414	SmCHI1	IV	OG3	TGACG-motif	645	650	cis-acting regulatory element involved in the MeJA-responsiveness
Selaginella moellendorffii	EFJ35745	SELMODRAFT_227414	SmCHI1	IV	OG3	TGACG-motif	1004	1009	cis-acting regulatory element involved in the MeJA-responsiveness
Selaginella moellendorffii	EFJ35745	SELMODRAFT_227414	SmCHI1	IV	OG3	TCT-motif	99	105	part of a light responsive element
Selaginella moellendorffii	EFJ35745	SELMODRAFT_227414	SmCHI1	IV	OG3	TCT-motif	270	276	part of a light responsive element
Selaginella moellendorffii	EFJ35745	SELMODRAFT_227414	SmCHI1	IV	OG3	TCT-motif	1214	1220	part of a light responsive element
Selaginella moellendorffii	EFJ35745	SELMODRAFT_227414	SmCHI1	IV	OG3	GATA-motif	1678	1685	part of a light responsive element
Selaginella moellendorffii	EFJ35745	SELMODRAFT_227414	SmCHI1	IV	OG3	CAT-box	172	178	cis-acting regulatory element related to meristem expression
Selaginella moellendorffii	EFJ35745	SELMODRAFT_227414	SmCHI1	IV	OG3	G-box	365	371	cis-acting regulatory element involved in light responsiveness
Selaginella moellendorffii	EFJ35745	SELMODRAFT_227414	SmCHI1	IV	OG3	ARE	414	420	cis-acting regulatory element essential for the anaerobic induction
Selaginella moellendorffii	EFJ35745	SELMODRAFT_227414	SmCHI1	IV	OG3	ARE	600	606	cis-acting regulatory element essential for the anaerobic induction
Selaginella moellendorffii	EFJ35745	SELMODRAFT_227414	SmCHI1	IV	OG3	ARE	657	663	cis-acting regulatory element essential for the anaerobic induction
Selaginella moellendorffii	EFJ35745	SELMODRAFT_227414	SmCHI1	IV	OG3	ARE	1113	1119	cis-acting regulatory element essential for the anaerobic induction
Selaginella moellendorffii	EFJ35745	SELMODRAFT_227414	SmCHI1	IV	OG3	ARE	1193	1199	cis-acting regulatory element essential for the anaerobic induction
Selaginella moellendorffii	EFJ35745	SELMODRAFT_227414	SmCHI1	IV	OG3	ARE	1663	1669	cis-acting regulatory element essential for the anaerobic induction
Selaginella moellendorffii	EFJ35745	SELMODRAFT_227414	SmCHI1	IV	OG3	ABRE	366	371	cis-acting element involved in the abscisic acid responsiveness
Selaginella moellendorffii	EFJ35745	SELMODRAFT_227414	SmCHI1	IV	OG3	ABRE	643	648	cis-acting element involved in the abscisic acid responsiveness
Selaginella moellendorffii	EFJ35745	SELMODRAFT_227414	SmCHI1	IV	OG3	ABRE	1951	1956	cis-acting element involved in the abscisic acid responsiveness
Selaginella moellendorffii	EFJ35745	SELMODRAFT_227414	SmCHI1	IV	OG3	TC-rich repeats	99	108	cis-acting element involved in defense and stress responsiveness
Selaginella moellendorffii	EFJ35745	SELMODRAFT_227414	SmCHI1	IV	OG3	TC-rich repeats	1107	1116	cis-acting element involved in defense and stress responsiveness
Selaginella moellendorffii	EFJ35745	SELMODRAFT_227414	SmCHI1	IV	OG3	G-box	643	649	cis-acting regulatory element involved in light responsiveness
Selaginella moellendorffii	EFJ35745	SELMODRAFT_227414	SmCHI1	IV	OG3	G-box	1950	1956	cis-acting regulatory element involved in light responsiveness
Selaginella moellendorffii	EFJ35745	SELMODRAFT_227414	SmCHI1	IV	OG3	Box II	295	304	part of a light responsive element
Selaginella moellendorffii	EFJ35745	SELMODRAFT_227414	SmCHI1	IV	OG3	Box II	1105	1114	part of a light responsive element
Selaginella moellendorffii	EFJ35745	SELMODRAFT_227414	SmCHI1	IV	OG3	CGTCA-motif	645	650	cis-acting regulatory element involved in the MeJA-responsiveness
Selaginella moellendorffii	EFJ35745	SELMODRAFT_227414	SmCHI1	IV	OG3	CGTCA-motif	1004	1009	cis-acting regulatory element involved in the MeJA-responsiveness
Glycine max	KRG92975	GLYMA_20G241500	GmCHI10	II	OG1	TGA-box	564	572	part of an auxin-responsive element
Glycine max	KRG92975	GLYMA_20G241500	GmCHI10	II	OG1	ARE	789	795	cis-acting regulatory element essential for the anaerobic induction
Glycine max	KRG92975	GLYMA_20G241500	GmCHI10	II	OG1	ABRE	836	841	cis-acting element involved in the abscisic acid responsiveness
Glycine max	KRG92975	GLYMA_20G241500	GmCHI10	II	OG1	ACE	1259	1268	cis-acting element involved in light responsiveness
Glycine max	KRG92975	GLYMA_20G241500	GmCHI10	II	OG1	GATT-motif	1030	1041	part of a light responsive element
Glycine max	KRG92975	GLYMA_20G241500	GmCHI10	II	OG1	CGTCA-motif	564	569	cis-acting regulatory element involved in the MeJA-responsiveness
Glycine max	KRG92975	GLYMA_20G241500	GmCHI10	II	OG1	CGTCA-motif	974	979	cis-acting regulatory element involved in the MeJA-responsiveness
Glycine max	KRG92975	GLYMA_20G241500	GmCHI10	II	OG1	CGTCA-motif	1175	1180	cis-acting regulatory element involved in the MeJA-responsiveness
Glycine max	KRG92975	GLYMA_20G241500	GmCHI10	II	OG1	G-box	836	842	cis-acting regulatory element involved in light responsiveness
Glycine max	KRG92975	GLYMA_20G241500	GmCHI10	II	OG1	TGACG-motif	564	569	cis-acting regulatory element involved in the MeJA-responsiveness
Glycine max	KRG92975	GLYMA_20G241500	GmCHI10	II	OG1	TGACG-motif	974	979	cis-acting regulatory element involved in the MeJA-responsiveness
Glycine max	KRG92975	GLYMA_20G241500	GmCHI10	II	OG1	TGACG-motif	1175	1180	cis-acting regulatory element involved in the MeJA-responsiveness
Glycine max	KRG92975	GLYMA_20G241500	GmCHI10	II	OG1	Box 4	587	593	part of a conserved DNA module involved in light responsiveness
Glycine max	KRG92975	GLYMA_20G241500	GmCHI10	II	OG1	Box 4	628	634	part of a conserved DNA module involved in light responsiveness
Glycine max	KRG92975	GLYMA_20G241500	GmCHI10	II	OG1	Box 4	810	816	part of a conserved DNA module involved in light responsiveness
Glycine max	KRG92975	GLYMA_20G241500	GmCHI10	II	OG1	Box 4	1243	1249	part of a conserved DNA module involved in light responsiveness
Glycine max	KRG92975	GLYMA_20G241500	GmCHI10	II	OG1	Box 4	1727	1733	part of a conserved DNA module involved in light responsiveness
Glycine max	KRG92975	GLYMA_20G241500	GmCHI10	II	OG1	chs-Unit 1 m1	1787	1797	part of a light responsive element
Glycine max	KRG92975	GLYMA_20G241500	GmCHI10	II	OG1	3-AF1 binding site	741	751	light responsive element
Glycine max	KRG92975	GLYMA_20G241500	GmCHI10	II	OG1	L-box	427	436	part of a light responsive element
Glycine max	KRG92975	GLYMA_20G241500	GmCHI10	II	OG1	TCT-motif	900	906	part of a light responsive element
Glycine max	KRG92975	GLYMA_20G241500	GmCHI10	II	OG1	TCT-motif	1214	1220	part of a light responsive element
Glycine max	KRG92975	GLYMA_20G241500	GmCHI10	II	OG1	AE-box	262	270	part of a module for light response
Glycine max	KRG92975	GLYMA_20G241500	GmCHI10	II	OG1	AE-box	1807	1815	part of a module for light response
Glycine max	KRG92975	GLYMA_20G241500	GmCHI10	II	OG1	chs-CMA1a	1925	1933	part of a light responsive element
Glycine max	KRG92975	GLYMA_20G241500	GmCHI10	II	OG1	TCCC-motif	333	340	part of a light responsive element
Glycine max	KRG92975	GLYMA_20G241500	GmCHI10	II	OG1	TCCC-motif	994	1001	part of a light responsive element
Glycine max	KRG92975	GLYMA_20G241500	GmCHI10	II	OG1	MBS	1307	1313	MYB binding site involved in drought-inducibility
Glycine max	KRG92975	GLYMA_20G241500	GmCHI10	II	OG1	MBS	1588	1594	MYB binding site involved in drought-inducibility
Glycine max	KRG92977	GLYMA_20G241600	GmCHI11	II	OG1	MRE	152	159	MYB binding site involved in light responsiveness
Glycine max	KRG92977	GLYMA_20G241600	GmCHI11	II	OG1	ARE	189	195	cis-acting regulatory element essential for the anaerobic induction
Glycine max	KRG92977	GLYMA_20G241600	GmCHI11	II	OG1	ABRE	1840	1845	cis-acting element involved in the abscisic acid responsiveness
Glycine max	KRG92977	GLYMA_20G241600	GmCHI11	II	OG1	ACE	1069	1078	cis-acting element involved in light responsiveness
Glycine max	KRG92977	GLYMA_20G241600	GmCHI11	II	OG1	TCT-motif	1292	1298	part of a light responsive element
Glycine max	KRG92977	GLYMA_20G241600	GmCHI11	II	OG1	chs-CMA1a	343	351	part of a light responsive element
Glycine max	KRG92977	GLYMA_20G241600	GmCHI11	II	OG1	AE-box	628	636	part of a module for light response
Glycine max	KRG92977	GLYMA_20G241600	GmCHI11	II	OG1	G-box	1839	1845	cis-acting regulatory element involved in light responsiveness
Glycine max	KRG92977	GLYMA_20G241600	GmCHI11	II	OG1	MBS	1740	1746	MYB binding site involved in drought-inducibility
Glycine max	KRG92977	GLYMA_20G241600	GmCHI11	II	OG1	MBS	1986	1992	MYB binding site involved in drought-inducibility
Glycine max	KRG92977	GLYMA_20G241600	GmCHI11	II	OG1	LTR	1372	1378	cis-acting element involved in low-temperature responsiveness
Glycine max	KRG92977	GLYMA_20G241600	GmCHI11	II	OG1	GCN4_motif	897	904	cis-regulatory element involved in endosperm expression
Glycine max	KRG92978	GLYMA_20G241700	GmCHI12	I	OG1	G-box	1386	1392	cis-acting regulatory element involved in light responsiveness
Glycine max	KRG92978	GLYMA_20G241700	GmCHI12	I	OG1	GT1-motif	299	305	light responsive element
Glycine max	KRG92978	GLYMA_20G241700	GmCHI12	I	OG1	Box 4	1161	1167	part of a conserved DNA module involved in light responsiveness
Glycine max	KRG92978	GLYMA_20G241700	GmCHI12	I	OG1	Box 4	1576	1582	part of a conserved DNA module involved in light responsiveness
Glycine max	KRG92978	GLYMA_20G241700	GmCHI12	I	OG1	Box 4	1692	1698	part of a conserved DNA module involved in light responsiveness
Glycine max	KRG92978	GLYMA_20G241700	GmCHI12	I	OG1	Box 4	1846	1852	part of a conserved DNA module involved in light responsiveness
Glycine max	KRG92978	GLYMA_20G241700	GmCHI12	I	OG1	TC-rich repeats	543	552	cis-acting element involved in defense and stress responsiveness
Glycine max	KRG92978	GLYMA_20G241700	GmCHI12	I	OG1	TC-rich repeats	709	718	cis-acting element involved in defense and stress responsiveness
Glycine max	KRG92978	GLYMA_20G241700	GmCHI12	I	OG1	G-box	1386	1392	cis-acting regulatory element involved in light responsiveness
Glycine max	KRG92978	GLYMA_20G241700	GmCHI12	I	OG1	ATCT-motif	1121	1130	part of a conserved DNA module involved in light responsiveness
Glycine max	KRG92978	GLYMA_20G241700	GmCHI12	I	OG1	MRE	301	308	MYB binding site involved in light responsiveness
Glycine max	KRG92978	GLYMA_20G241700	GmCHI12	I	OG1	ABRE	1386	1392	cis-acting element involved in the abscisic acid responsiveness
Glycine max	KRG92978	GLYMA_20G241700	GmCHI12	I	OG1	ABRE	1387	1392	cis-acting element involved in the abscisic acid responsiveness
Glycine max	KRG95539	GLYMA_19G156900	GmCHI9	III	OG5	GATA-motif	1761	1770	part of a light responsive element
Glycine max	KRG95539	GLYMA_19G156900	GmCHI9	III	OG5	TCT-motif	296	302	part of a light responsive element
Glycine max	KRG95539	GLYMA_19G156900	GmCHI9	III	OG5	Box 4	521	527	part of a conserved DNA module involved in light responsiveness
Glycine max	KRG95539	GLYMA_19G156900	GmCHI9	III	OG5	Box 4	682	688	part of a conserved DNA module involved in light responsiveness
Glycine max	KRG95539	GLYMA_19G156900	GmCHI9	III	OG5	Box 4	876	882	part of a conserved DNA module involved in light responsiveness
Glycine max	KRG95539	GLYMA_19G156900	GmCHI9	III	OG5	Box 4	885	891	part of a conserved DNA module involved in light responsiveness
Glycine max	KRG95539	GLYMA_19G156900	GmCHI9	III	OG5	Box 4	896	902	part of a conserved DNA module involved in light responsiveness
Glycine max	KRG95539	GLYMA_19G156900	GmCHI9	III	OG5	Box 4	1024	1030	part of a conserved DNA module involved in light responsiveness
Glycine max	KRG95539	GLYMA_19G156900	GmCHI9	III	OG5	Box 4	1059	1065	part of a conserved DNA module involved in light responsiveness
Glycine max	KRG95539	GLYMA_19G156900	GmCHI9	III	OG5	AT1-motif	1263	1276	part of a light responsive module
Glycine max	KRG95539	GLYMA_19G156900	GmCHI9	III	OG5	GT1-motif	1306	1312	light responsive element
Glycine max	KRG95539	GLYMA_19G156900	GmCHI9	III	OG5	GCN4_motif	420	427	cis-regulatory element involved in endosperm expression
Glycine max	KRG95539	GLYMA_19G156900	GmCHI9	III	OG5	LAMP-element	1089	1097	part of a light responsive element
Glycine max	KRG95539	GLYMA_19G156900	GmCHI9	III	OG5	TCCC-motif	1925	1932	part of a light responsive element
Glycine max	KRG95539	GLYMA_19G156900	GmCHI9	III	OG5	chs-CMA1a	1629	1637	part of a light responsive element
Glycine max	KRG95539	GLYMA_19G156900	GmCHI9	III	OG5	ABRE	891	896	cis-acting element involved in the abscisic acid responsiveness
Glycine max	KRG95539	GLYMA_19G156900	GmCHI9	III	OG5	ARE	832	838	cis-acting regulatory element essential for the anaerobic induction
Glycine max	KRG95539	GLYMA_19G156900	GmCHI9	III	OG5	G-box	891	897	cis-acting regulatory element involved in light responsiveness
Glycine max	KRH05421	GLYMA_17G226600	GmCHI8	III	OG2	G-box	453	459	cis-acting regulatory element involved in light responsiveness
Glycine max	KRH05421	GLYMA_17G226600	GmCHI8	III	OG2	G-box	628	634	cis-acting regulatory element involved in light responsiveness
Glycine max	KRH05421	GLYMA_17G226600	GmCHI8	III	OG2	G-box	1859	1865	cis-acting regulatory element involved in light responsiveness
Glycine max	KRH05421	GLYMA_17G226600	GmCHI8	III	OG2	LAMP-element	1646	1654	part of a light responsive element
Glycine max	KRH05421	GLYMA_17G226600	GmCHI8	III	OG2	AT1-motif	814	827	part of a light responsive module
Glycine max	KRH05421	GLYMA_17G226600	GmCHI8	III	OG2	LTR	867	873	cis-acting element involved in low-temperature responsiveness
Glycine max	KRH05421	GLYMA_17G226600	GmCHI8	III	OG2	LTR	1541	1547	cis-acting element involved in low-temperature responsiveness
Glycine max	KRH05421	GLYMA_17G226600	GmCHI8	III	OG2	GT1-motif	1833	1839	light responsive element
Glycine max	KRH05421	GLYMA_17G226600	GmCHI8	III	OG2	Box 4	553	559	part of a conserved DNA module involved in light responsiveness
Glycine max	KRH05421	GLYMA_17G226600	GmCHI8	III	OG2	Box 4	947	953	part of a conserved DNA module involved in light responsiveness
Glycine max	KRH05421	GLYMA_17G226600	GmCHI8	III	OG2	Box 4	967	973	part of a conserved DNA module involved in light responsiveness
Glycine max	KRH05421	GLYMA_17G226600	GmCHI8	III	OG2	Box 4	1179	1185	part of a conserved DNA module involved in light responsiveness
Glycine max	KRH05421	GLYMA_17G226600	GmCHI8	III	OG2	TGACG-motif	1956	1961	cis-acting regulatory element involved in the MeJA-responsiveness
Glycine max	KRH05421	GLYMA_17G226600	GmCHI8	III	OG2	circadian	1129	1138	cis-acting regulatory element involved in circadian control
Glycine max	KRH05421	GLYMA_17G226600	GmCHI8	III	OG2	TC-rich repeats	1138	1147	cis-acting element involved in defense and stress responsiveness
Glycine max	KRH05421	GLYMA_17G226600	GmCHI8	III	OG2	G-box	457	468	cis-acting regulatory element involved in light responsiveness
Glycine max	KRH05421	GLYMA_17G226600	GmCHI8	III	OG2	G-box	1295	1301	cis-acting regulatory element involved in light responsiveness
Glycine max	KRH05421	GLYMA_17G226600	GmCHI8	III	OG2	G-box	1859	1865	cis-acting regulatory element involved in light responsiveness
Glycine max	KRH05421	GLYMA_17G226600	GmCHI8	III	OG2	G-box	1967	1973	cis-acting regulatory element involved in light responsiveness
Glycine max	KRH05421	GLYMA_17G226600	GmCHI8	III	OG2	G-box	1970	1976	cis-acting regulatory element involved in light responsiveness
Glycine max	KRH05421	GLYMA_17G226600	GmCHI8	III	OG2	CGTCA-motif	1956	1961	cis-acting regulatory element involved in the MeJA-responsiveness
Glycine max	KRH05421	GLYMA_17G226600	GmCHI8	III	OG2	ARE	1613	1619	cis-acting regulatory element essential for the anaerobic induction
Glycine max	KRH05421	GLYMA_17G226600	GmCHI8	III	OG2	MRE	1259	1266	MYB binding site involved in light responsiveness
Glycine max	KRH05421	GLYMA_17G226600	GmCHI8	III	OG2	TATC-box	148	155	cis-acting element involved in gibberellin-responsiveness
Glycine max	KRH05421	GLYMA_17G226600	GmCHI8	III	OG2	ABRE	454	459	cis-acting element involved in the abscisic acid responsiveness
Glycine max	KRH05421	GLYMA_17G226600	GmCHI8	III	OG2	ABRE	458	467	cis-acting element involved in the abscisic acid responsiveness
Glycine max	KRH05421	GLYMA_17G226600	GmCHI8	III	OG2	ABRE	628	633	cis-acting element involved in the abscisic acid responsiveness
Glycine max	KRH05421	GLYMA_17G226600	GmCHI8	III	OG2	ABRE	1859	1865	cis-acting element involved in the abscisic acid responsiveness
Glycine max	KRH05421	GLYMA_17G226600	GmCHI8	III	OG2	ABRE	1860	1865	cis-acting element involved in the abscisic acid responsiveness
Glycine max	KRH05421	GLYMA_17G226600	GmCHI8	III	OG2	ABRE	1971	1976	cis-acting element involved in the abscisic acid responsiveness
Glycine max	KRH13487	GLYMA_15G242900	GmCHI7	III	OG4	TGACG-motif	12	17	cis-acting regulatory element involved in the MeJA-responsiveness
Glycine max	KRH13487	GLYMA_15G242900	GmCHI7	III	OG4	TGACG-motif	228	233	cis-acting regulatory element involved in the MeJA-responsiveness
Glycine max	KRH13487	GLYMA_15G242900	GmCHI7	III	OG4	TGACG-motif	287	292	cis-acting regulatory element involved in the MeJA-responsiveness
Glycine max	KRH13487	GLYMA_15G242900	GmCHI7	III	OG4	TGACG-motif	1995	2000	cis-acting regulatory element involved in the MeJA-responsiveness
Glycine max	KRH13487	GLYMA_15G242900	GmCHI7	III	OG4	Box 4	411	417	part of a conserved DNA module involved in light responsiveness
Glycine max	KRH13487	GLYMA_15G242900	GmCHI7	III	OG4	Box 4	650	656	part of a conserved DNA module involved in light responsiveness
Glycine max	KRH13487	GLYMA_15G242900	GmCHI7	III	OG4	Box 4	1235	1241	part of a conserved DNA module involved in light responsiveness
Glycine max	KRH13487	GLYMA_15G242900	GmCHI7	III	OG4	MBSI	1319	1330	MYB binding site involved in flavonoid biosynthetic genes regulation
Glycine max	KRH13487	GLYMA_15G242900	GmCHI7	III	OG4	GATA-motif	1888	1895	part of a light responsive element
Glycine max	KRH13487	GLYMA_15G242900	GmCHI7	III	OG4	LAMP-element	246	254	part of a light responsive element
Glycine max	KRH13487	GLYMA_15G242900	GmCHI7	III	OG4	GT1-motif	633	640	light responsive element
Glycine max	KRH13487	GLYMA_15G242900	GmCHI7	III	OG4	GT1-motif	1815	1822	light responsive element
Glycine max	KRH13487	GLYMA_15G242900	GmCHI7	III	OG4	GT1-motif	1823	1830	light responsive element
Glycine max	KRH13487	GLYMA_15G242900	GmCHI7	III	OG4	ARE	1327	1333	cis-acting regulatory element essential for the anaerobic induction
Glycine max	KRH13487	GLYMA_15G242900	GmCHI7	III	OG4	ARE	1769	1775	cis-acting regulatory element essential for the anaerobic induction
Glycine max	KRH13487	GLYMA_15G242900	GmCHI7	III	OG4	ABRE	1941	1948	cis-acting element involved in the abscisic acid responsiveness
Glycine max	KRH13487	GLYMA_15G242900	GmCHI7	III	OG4	Sp1	1929	1935	light responsive element
Glycine max	KRH13487	GLYMA_15G242900	GmCHI7	III	OG4	CGTCA-motif	12	17	cis-acting regulatory element involved in the MeJA-responsiveness
Glycine max	KRH13487	GLYMA_15G242900	GmCHI7	III	OG4	CGTCA-motif	228	233	cis-acting regulatory element involved in the MeJA-responsiveness
Glycine max	KRH13487	GLYMA_15G242900	GmCHI7	III	OG4	CGTCA-motif	287	292	cis-acting regulatory element involved in the MeJA-responsiveness
Glycine max	KRH13487	GLYMA_15G242900	GmCHI7	III	OG4	CGTCA-motif	1995	2000	cis-acting regulatory element involved in the MeJA-responsiveness
Glycine max	KRH13487	GLYMA_15G242900	GmCHI7	III	OG4	TCA-element	1407	1416	cis-acting element involved in salicylic acid responsiveness
Glycine max	KRH15594	GLYMA_14G098100	GmCHI6	III	OG2	G-box	1776	1782	cis-acting regulatory element involved in light responsiveness
Glycine max	KRH15594	GLYMA_14G098100	GmCHI6	III	OG2	G-box	1776	1782	cis-acting regulatory element involved in light responsiveness
Glycine max	KRH15594	GLYMA_14G098100	GmCHI6	III	OG2	G-box	1886	1892	cis-acting regulatory element involved in light responsiveness
Glycine max	KRH15594	GLYMA_14G098100	GmCHI6	III	OG2	G-box	1889	1895	cis-acting regulatory element involved in light responsiveness
Glycine max	KRH15594	GLYMA_14G098100	GmCHI6	III	OG2	CGTCA-motif	1875	1880	cis-acting regulatory element involved in the MeJA-responsiveness
Glycine max	KRH15594	GLYMA_14G098100	GmCHI6	III	OG2	GT1-motif	575	581	light responsive element
Glycine max	KRH15594	GLYMA_14G098100	GmCHI6	III	OG2	ARE	498	504	cis-acting regulatory element essential for the anaerobic induction
Glycine max	KRH15594	GLYMA_14G098100	GmCHI6	III	OG2	TGACG-motif	1875	1880	cis-acting regulatory element involved in the MeJA-responsiveness
Glycine max	KRH15594	GLYMA_14G098100	GmCHI6	III	OG2	Box 4	189	195	part of a conserved DNA module involved in light responsiveness
Glycine max	KRH15594	GLYMA_14G098100	GmCHI6	III	OG2	Box 4	693	699	part of a conserved DNA module involved in light responsiveness
Glycine max	KRH15594	GLYMA_14G098100	GmCHI6	III	OG2	Box 4	1284	1290	part of a conserved DNA module involved in light responsiveness
Glycine max	KRH15594	GLYMA_14G098100	GmCHI6	III	OG2	Box 4	1315	1321	part of a conserved DNA module involved in light responsiveness
Glycine max	KRH15594	GLYMA_14G098100	GmCHI6	III	OG2	ABRE	1057	1064	cis-acting element involved in the abscisic acid responsiveness
Glycine max	KRH15594	GLYMA_14G098100	GmCHI6	III	OG2	ABRE	1776	1782	cis-acting element involved in the abscisic acid responsiveness
Glycine max	KRH15594	GLYMA_14G098100	GmCHI6	III	OG2	ABRE	1777	1782	cis-acting element involved in the abscisic acid responsiveness
Glycine max	KRH15594	GLYMA_14G098100	GmCHI6	III	OG2	ABRE	1890	1895	cis-acting element involved in the abscisic acid responsiveness
Glycine max	KRH21842	GLYMA_13G262500	GmCHI5	III	OG4	Box 4	446	452	part of a conserved DNA module involved in light responsiveness
Glycine max	KRH21842	GLYMA_13G262500	GmCHI5	III	OG4	Box 4	807	813	part of a conserved DNA module involved in light responsiveness
Glycine max	KRH21842	GLYMA_13G262500	GmCHI5	III	OG4	Box 4	874	880	part of a conserved DNA module involved in light responsiveness
Glycine max	KRH21842	GLYMA_13G262500	GmCHI5	III	OG4	Box 4	965	971	part of a conserved DNA module involved in light responsiveness
Glycine max	KRH21842	GLYMA_13G262500	GmCHI5	III	OG4	Box 4	1132	1138	part of a conserved DNA module involved in light responsiveness
Glycine max	KRH21842	GLYMA_13G262500	GmCHI5	III	OG4	MBSI	913	923.5	MYB binding site involved in flavonoid biosynthetic genes regulation
Glycine max	KRH21842	GLYMA_13G262500	GmCHI5	III	OG4	TGACG-motif	1887	1892	cis-acting regulatory element involved in the MeJA-responsiveness
Glycine max	KRH21842	GLYMA_13G262500	GmCHI5	III	OG4	TGACG-motif	1984	1989	cis-acting regulatory element involved in the MeJA-responsiveness
Glycine max	KRH21842	GLYMA_13G262500	GmCHI5	III	OG4	CAT-box	133	139	cis-acting regulatory element related to meristem expression
Glycine max	KRH21842	GLYMA_13G262500	GmCHI5	III	OG4	G-box	850	856	cis-acting regulatory element involved in light responsiveness
Glycine max	KRH21842	GLYMA_13G262500	GmCHI5	III	OG4	G-box	1785	1791	cis-acting regulatory element involved in light responsiveness
Glycine max	KRH21842	GLYMA_13G262500	GmCHI5	III	OG4	AT1-motif	533	546	part of a light responsive module
Glycine max	KRH21842	GLYMA_13G262500	GmCHI5	III	OG4	GT1-motif	769	776	light responsive element
Glycine max	KRH21842	GLYMA_13G262500	GmCHI5	III	OG4	GT1-motif	770	776	light responsive element
Glycine max	KRH21842	GLYMA_13G262500	GmCHI5	III	OG4	GT1-motif	920	927	light responsive element
Glycine max	KRH21842	GLYMA_13G262500	GmCHI5	III	OG4	GT1-motif	1329	1338	light responsive element
Glycine max	KRH21842	GLYMA_13G262500	GmCHI5	III	OG4	O2-site	1970	1979	cis-acting regulatory element involved in zein metabolism regulation
Glycine max	KRH21842	GLYMA_13G262500	GmCHI5	III	OG4	ARE	218	224	cis-acting regulatory element essential for the anaerobic induction
Glycine max	KRH21842	GLYMA_13G262500	GmCHI5	III	OG4	ARE	1562	1568	cis-acting regulatory element essential for the anaerobic induction
Glycine max	KRH21842	GLYMA_13G262500	GmCHI5	III	OG4	ARE	1583	1589	cis-acting regulatory element essential for the anaerobic induction
Glycine max	KRH21842	GLYMA_13G262500	GmCHI5	III	OG4	TATC-box	184	191	cis-acting element involved in gibberellin-responsiveness
Glycine max	KRH21842	GLYMA_13G262500	GmCHI5	III	OG4	ABRE	850	856	cis-acting element involved in the abscisic acid responsiveness
Glycine max	KRH21842	GLYMA_13G262500	GmCHI5	III	OG4	ABRE	851	856	cis-acting element involved in the abscisic acid responsiveness
Glycine max	KRH21842	GLYMA_13G262500	GmCHI5	III	OG4	ABRE	1785	1790	cis-acting element involved in the abscisic acid responsiveness
Glycine max	KRH21842	GLYMA_13G262500	GmCHI5	III	OG4	ABRE	1940	1947	cis-acting element involved in the abscisic acid responsiveness
Glycine max	KRH21842	GLYMA_13G262500	GmCHI5	III	OG4	TCA-element	607	616	cis-acting element involved in salicylic acid responsiveness
Glycine max	KRH21842	GLYMA_13G262500	GmCHI5	III	OG4	CGTCA-motif	1887	1892	cis-acting regulatory element involved in the MeJA-responsiveness
Glycine max	KRH21842	GLYMA_13G262500	GmCHI5	III	OG4	CGTCA-motif	1984	1989	cis-acting regulatory element involved in the MeJA-responsiveness
Glycine max	KRH21842	GLYMA_13G262500	GmCHI5	III	OG4	G-box	849	857	cis-acting regulatory element involved in light responsiveness
Glycine max	KRH21842	GLYMA_13G262500	GmCHI5	III	OG4	G-box	850	856	cis-acting regulatory element involved in light responsiveness
Glycine max	KRH21842	GLYMA_13G262500	GmCHI5	III	OG4	ATCT-motif	1550	1559	part of a conserved DNA module involved in light responsiveness
Glycine max	KRH36227	GLYMA_10G292200	GmCHI4	II	OG1	AT1-motif	795	808	part of a light responsive module
Glycine max	KRH36227	GLYMA_10G292200	GmCHI4	II	OG1	GT1-motif	1823	1830	light responsive element
Glycine max	KRH36227	GLYMA_10G292200	GmCHI4	II	OG1	GT1-motif	1824	1830	light responsive element
Glycine max	KRH36227	GLYMA_10G292200	GmCHI4	II	OG1	GT1-motif	1973	1980	light responsive element
Glycine max	KRH36227	GLYMA_10G292200	GmCHI4	II	OG1	GT1-motif	1974	1980	light responsive element
Glycine max	KRH36227	GLYMA_10G292200	GmCHI4	II	OG1	MBS	1368	1374	MYB binding site involved in drought-inducibility
Glycine max	KRH36227	GLYMA_10G292200	GmCHI4	II	OG1	MBS	1954	1960	MYB binding site involved in drought-inducibility
Glycine max	KRH36227	GLYMA_10G292200	GmCHI4	II	OG1	O2-site	121	129	cis-acting regulatory element involved in zein metabolism regulation
Glycine max	KRH36227	GLYMA_10G292200	GmCHI4	II	OG1	Box 4	1022	1028	part of a conserved DNA module involved in light responsiveness
Glycine max	KRH36227	GLYMA_10G292200	GmCHI4	II	OG1	Box 4	1091	1097	part of a conserved DNA module involved in light responsiveness
Glycine max	KRH36227	GLYMA_10G292200	GmCHI4	II	OG1	Box 4	1156	1162	part of a conserved DNA module involved in light responsiveness
Glycine max	KRH36227	GLYMA_10G292200	GmCHI4	II	OG1	Box 4	1208	1214	part of a conserved DNA module involved in light responsiveness
Glycine max	KRH36227	GLYMA_10G292200	GmCHI4	II	OG1	TGACG-motif	698	703	cis-acting regulatory element involved in the MeJA-responsiveness
Glycine max	KRH36227	GLYMA_10G292200	GmCHI4	II	OG1	CAT-box	1942	1948	cis-acting regulatory element related to meristem expression
Glycine max	KRH36227	GLYMA_10G292200	GmCHI4	II	OG1	ACE	1728	1737	cis-acting element involved in light responsiveness
Glycine max	KRH36227	GLYMA_10G292200	GmCHI4	II	OG1	TC-rich repeats	1686	1695	cis-acting element involved in defense and stress responsiveness
Glycine max	KRH36227	GLYMA_10G292200	GmCHI4	II	OG1	CGTCA-motif	698	703	cis-acting regulatory element involved in the MeJA-responsiveness
Glycine max	KRH36227	GLYMA_10G292200	GmCHI4	II	OG1	Box II	982	991	part of a light responsive element
Glycine max	KRH36227	GLYMA_10G292200	GmCHI4	II	OG1	G-box	983	993	cis-acting regulatory element involved in light responsiveness
Glycine max	KRH36227	GLYMA_10G292200	GmCHI4	II	OG1	G-box	984	990	cis-acting regulatory element involved in light responsiveness
Glycine max	KRH36227	GLYMA_10G292200	GmCHI4	II	OG1	MRE	323	330	MYB binding site involved in light responsiveness
Glycine max	KRH36227	GLYMA_10G292200	GmCHI4	II	OG1	MRE	1027	1034	MYB binding site involved in light responsiveness
Glycine max	KRH36227	GLYMA_10G292200	GmCHI4	II	OG1	ABRE	985	990	cis-acting element involved in the abscisic acid responsiveness
Glycine max	KRH53728	GLYMA_06G143000	GmCHI3	IV	OG3	AE-box	153	161	part of a module for light response
Glycine max	KRH53728	GLYMA_06G143000	GmCHI3	IV	OG3	G-box	276	282	cis-acting regulatory element involved in light responsiveness
Glycine max	KRH53728	GLYMA_06G143000	GmCHI3	IV	OG3	G-box	336	342	cis-acting regulatory element involved in light responsiveness
Glycine max	KRH53728	GLYMA_06G143000	GmCHI3	IV	OG3	G-box	360	366	cis-acting regulatory element involved in light responsiveness
Glycine max	KRH53728	GLYMA_06G143000	GmCHI3	IV	OG3	G-box	1021	1027	cis-acting regulatory element involved in light responsiveness
Glycine max	KRH53728	GLYMA_06G143000	GmCHI3	IV	OG3	G-box	1090	1096	cis-acting regulatory element involved in light responsiveness
Glycine max	KRH53728	GLYMA_06G143000	GmCHI3	IV	OG3	G-box	1786	1792	cis-acting regulatory element involved in light responsiveness
Glycine max	KRH53728	GLYMA_06G143000	GmCHI3	IV	OG3	TGA-element	1077	1083	auxin-responsive element
Glycine max	KRH53728	GLYMA_06G143000	GmCHI3	IV	OG3	TGA-element	1159	1165	auxin-responsive element
Glycine max	KRH53728	GLYMA_06G143000	GmCHI3	IV	OG3	MBS	679	685	MYB binding site involved in drought-inducibility
Glycine max	KRH53728	GLYMA_06G143000	GmCHI3	IV	OG3	MBS	1385	1391	MYB binding site involved in drought-inducibility
Glycine max	KRH53728	GLYMA_06G143000	GmCHI3	IV	OG3	TGACG-motif	396	401	cis-acting regulatory element involved in the MeJA-responsiveness
Glycine max	KRH53728	GLYMA_06G143000	GmCHI3	IV	OG3	TGACG-motif	904	909	cis-acting regulatory element involved in the MeJA-responsiveness
Glycine max	KRH53728	GLYMA_06G143000	GmCHI3	IV	OG3	TGACG-motif	1468	1473	cis-acting regulatory element involved in the MeJA-responsiveness
Glycine max	KRH53728	GLYMA_06G143000	GmCHI3	IV	OG3	MBSI	1403	1413.5	MYB binding site involved in flavonoid biosynthetic genes regulation
Glycine max	KRH53728	GLYMA_06G143000	GmCHI3	IV	OG3	Box 4	793	799	part of a conserved DNA module involved in light responsiveness
Glycine max	KRH53728	GLYMA_06G143000	GmCHI3	IV	OG3	Box 4	1894	1900	part of a conserved DNA module involved in light responsiveness
Glycine max	KRH53728	GLYMA_06G143000	GmCHI3	IV	OG3	TCT-motif	1347	1353	part of a light responsive element
Glycine max	KRH53728	GLYMA_06G143000	GmCHI3	IV	OG3	G-box	358	368	cis-acting regulatory element involved in light responsiveness
Glycine max	KRH53728	GLYMA_06G143000	GmCHI3	IV	OG3	G-box	359	368	cis-acting regulatory element involved in light responsiveness
Glycine max	KRH53728	GLYMA_06G143000	GmCHI3	IV	OG3	G-box	360	366	cis-acting regulatory element involved in light responsiveness
Glycine max	KRH53728	GLYMA_06G143000	GmCHI3	IV	OG3	G-box	394	400	cis-acting regulatory element involved in light responsiveness
Glycine max	KRH53728	GLYMA_06G143000	GmCHI3	IV	OG3	G-box	986	992	cis-acting regulatory element involved in light responsiveness
Glycine max	KRH53728	GLYMA_06G143000	GmCHI3	IV	OG3	G-box	1021	1027	cis-acting regulatory element involved in light responsiveness
Glycine max	KRH53728	GLYMA_06G143000	GmCHI3	IV	OG3	G-box	1785	1793	cis-acting regulatory element involved in light responsiveness
Glycine max	KRH53728	GLYMA_06G143000	GmCHI3	IV	OG3	G-box	1786	1792	cis-acting regulatory element involved in light responsiveness
Glycine max	KRH53728	GLYMA_06G143000	GmCHI3	IV	OG3	CGTCA-motif	396	401	cis-acting regulatory element involved in the MeJA-responsiveness
Glycine max	KRH53728	GLYMA_06G143000	GmCHI3	IV	OG3	CGTCA-motif	904	909	cis-acting regulatory element involved in the MeJA-responsiveness
Glycine max	KRH53728	GLYMA_06G143000	GmCHI3	IV	OG3	CGTCA-motif	1468	1473	cis-acting regulatory element involved in the MeJA-responsiveness
Glycine max	KRH53728	GLYMA_06G143000	GmCHI3	IV	OG3	TCA-element	925	934	cis-acting element involved in salicylic acid responsiveness
Glycine max	KRH53728	GLYMA_06G143000	GmCHI3	IV	OG3	TCA-element	1406	1415	cis-acting element involved in salicylic acid responsiveness
Glycine max	KRH53728	GLYMA_06G143000	GmCHI3	IV	OG3	ABRE	276	281	cis-acting element involved in the abscisic acid responsiveness
Glycine max	KRH53728	GLYMA_06G143000	GmCHI3	IV	OG3	ABRE	336	341	cis-acting element involved in the abscisic acid responsiveness
Glycine max	KRH53728	GLYMA_06G143000	GmCHI3	IV	OG3	ABRE	358	367	cis-acting element involved in the abscisic acid responsiveness
Glycine max	KRH53728	GLYMA_06G143000	GmCHI3	IV	OG3	ABRE	360	366	cis-acting element involved in the abscisic acid responsiveness
Glycine max	KRH53728	GLYMA_06G143000	GmCHI3	IV	OG3	ABRE	361	366	cis-acting element involved in the abscisic acid responsiveness
Glycine max	KRH53728	GLYMA_06G143000	GmCHI3	IV	OG3	ABRE	394	399	cis-acting element involved in the abscisic acid responsiveness
Glycine max	KRH53728	GLYMA_06G143000	GmCHI3	IV	OG3	ABRE	987	992	cis-acting element involved in the abscisic acid responsiveness
Glycine max	KRH53728	GLYMA_06G143000	GmCHI3	IV	OG3	ABRE	1021	1027	cis-acting element involved in the abscisic acid responsiveness
Glycine max	KRH53728	GLYMA_06G143000	GmCHI3	IV	OG3	ABRE	1022	1027	cis-acting element involved in the abscisic acid responsiveness
Glycine max	KRH53728	GLYMA_06G143000	GmCHI3	IV	OG3	ABRE	1091	1096	cis-acting element involved in the abscisic acid responsiveness
Glycine max	KRH53728	GLYMA_06G143000	GmCHI3	IV	OG3	ABRE	1786	1792	cis-acting element involved in the abscisic acid responsiveness
Glycine max	KRH53728	GLYMA_06G143000	GmCHI3	IV	OG3	ABRE	1787	1792	cis-acting element involved in the abscisic acid responsiveness
Glycine max	KRH64204	GLYMA_04G222400	GmCHI2	IV	OG3	TGACG-motif	1442	1447	cis-acting regulatory element involved in the MeJA-responsiveness
Glycine max	KRH64204	GLYMA_04G222400	GmCHI2	IV	OG3	Box 4	56	62	part of a conserved DNA module involved in light responsiveness
Glycine max	KRH64204	GLYMA_04G222400	GmCHI2	IV	OG3	Box 4	185	191	part of a conserved DNA module involved in light responsiveness
Glycine max	KRH64204	GLYMA_04G222400	GmCHI2	IV	OG3	Box 4	773	779	part of a conserved DNA module involved in light responsiveness
Glycine max	KRH64204	GLYMA_04G222400	GmCHI2	IV	OG3	CAT-box	554	560	cis-acting regulatory element related to meristem expression
Glycine max	KRH64204	GLYMA_04G222400	GmCHI2	IV	OG3	L-box	299	308	part of a light responsive element
Glycine max	KRH64204	GLYMA_04G222400	GmCHI2	IV	OG3	TCT-motif	1311	1317	part of a light responsive element
Glycine max	KRH64204	GLYMA_04G222400	GmCHI2	IV	OG3	TCCC-motif	255	262	part of a light responsive element
Glycine max	KRH64204	GLYMA_04G222400	GmCHI2	IV	OG3	GT1-motif	261	267	light responsive element
Glycine max	KRH64204	GLYMA_04G222400	GmCHI2	IV	OG3	MBS	1349	1355	MYB binding site involved in drought-inducibility
Glycine max	KRH64204	GLYMA_04G222400	GmCHI2	IV	OG3	ARE	23	29	cis-acting regulatory element essential for the anaerobic induction
Glycine max	KRH64204	GLYMA_04G222400	GmCHI2	IV	OG3	ARE	549	555	cis-acting regulatory element essential for the anaerobic induction
Glycine max	KRH64204	GLYMA_04G222400	GmCHI2	IV	OG3	L-box	1281	1291	part of a light responsive element
Glycine max	KRH64204	GLYMA_04G222400	GmCHI2	IV	OG3	ABRE	443	448	cis-acting element involved in the abscisic acid responsiveness
Glycine max	KRH64204	GLYMA_04G222400	GmCHI2	IV	OG3	GATT-motif	1446	1458	part of a light responsive element
Glycine max	KRH64204	GLYMA_04G222400	GmCHI2	IV	OG3	CGTCA-motif	1442	1447	cis-acting regulatory element involved in the MeJA-responsiveness
Glycine max	KRH64204	GLYMA_04G222400	GmCHI2	IV	OG3	TCA-element	1370	1379	cis-acting element involved in salicylic acid responsiveness
Glycine max	KRH64204	GLYMA_04G222400	GmCHI2	IV	OG3	G-box	442	448	cis-acting regulatory element involved in light responsiveness
Glycine max	KRH67214	GLYMA_03G154600	GmCHI1	III	OG5	CAT-box	1302	1308	cis-acting regulatory element related to meristem expression
Glycine max	KRH67214	GLYMA_03G154600	GmCHI1	III	OG5	CAT-box	1536	1542	cis-acting regulatory element related to meristem expression
Glycine max	KRH67214	GLYMA_03G154600	GmCHI1	III	OG5	P-box	811	818	gibberellin-responsive element
Glycine max	KRH67214	GLYMA_03G154600	GmCHI1	III	OG5	Box 4	375	381	part of a conserved DNA module involved in light responsiveness
Glycine max	KRH67214	GLYMA_03G154600	GmCHI1	III	OG5	Box 4	754	760	part of a conserved DNA module involved in light responsiveness
Glycine max	KRH67214	GLYMA_03G154600	GmCHI1	III	OG5	Box 4	1829	1835	part of a conserved DNA module involved in light responsiveness
Glycine max	KRH67214	GLYMA_03G154600	GmCHI1	III	OG5	TGACG-motif	66	71	cis-acting regulatory element involved in the MeJA-responsiveness
Glycine max	KRH67214	GLYMA_03G154600	GmCHI1	III	OG5	LTR	26	32	cis-acting element involved in low-temperature responsiveness
Glycine max	KRH67214	GLYMA_03G154600	GmCHI1	III	OG5	GT1-motif	428	434	light responsive element
Glycine max	KRH67214	GLYMA_03G154600	GmCHI1	III	OG5	GT1-motif	1395	1401	light responsive element
Glycine max	KRH67214	GLYMA_03G154600	GmCHI1	III	OG5	AE-box	1772	1780	part of a module for light response
Glycine max	KRH67214	GLYMA_03G154600	GmCHI1	III	OG5	TCCC-motif	901	908	part of a light responsive element
Glycine max	KRH67214	GLYMA_03G154600	GmCHI1	III	OG5	G-box	1459	1465	cis-acting regulatory element involved in light responsiveness
Glycine max	KRH67214	GLYMA_03G154600	GmCHI1	III	OG5	ABRE	270	275	cis-acting element involved in the abscisic acid responsiveness
Glycine max	KRH67214	GLYMA_03G154600	GmCHI1	III	OG5	ABRE	359	364	cis-acting element involved in the abscisic acid responsiveness
Glycine max	KRH67214	GLYMA_03G154600	GmCHI1	III	OG5	ABRE	1459	1464	cis-acting element involved in the abscisic acid responsiveness
Glycine max	KRH67214	GLYMA_03G154600	GmCHI1	III	OG5	CGTCA-motif	66	71	cis-acting regulatory element involved in the MeJA-responsiveness
Glycine max	KRH67214	GLYMA_03G154600	GmCHI1	III	OG5	G-box	270	276	cis-acting regulatory element involved in light responsiveness
Glycine max	KRH67214	GLYMA_03G154600	GmCHI1	III	OG5	G-box	358	364	cis-acting regulatory element involved in light responsiveness
Glycine max	KRH67214	GLYMA_03G154600	GmCHI1	III	OG5	TC-rich repeats	363	372	cis-acting element involved in defense and stress responsiveness
Oryza sativa	Os02t0320300-01	Os02g0320300	OsCHI1	III	OG4	ATCT-motif	1389	1398	part of a conserved DNA module involved in light responsiveness
Oryza sativa	Os02t0320300-01	Os02g0320300	OsCHI1	III	OG4	G-box	88	97	cis-acting regulatory element involved in light responsiveness
Oryza sativa	Os02t0320300-01	Os02g0320300	OsCHI1	III	OG4	G-box	91	97	cis-acting regulatory element involved in light responsiveness
Oryza sativa	Os02t0320300-01	Os02g0320300	OsCHI1	III	OG4	G-box	225	231	cis-acting regulatory element involved in light responsiveness
Oryza sativa	Os02t0320300-01	Os02g0320300	OsCHI1	III	OG4	G-box	1967	1973	cis-acting regulatory element involved in light responsiveness
Oryza sativa	Os02t0320300-01	Os02g0320300	OsCHI1	III	OG4	CGTCA-motif	16	21	cis-acting regulatory element involved in the MeJA-responsiveness
Oryza sativa	Os02t0320300-01	Os02g0320300	OsCHI1	III	OG4	CGTCA-motif	935	940	cis-acting regulatory element involved in the MeJA-responsiveness
Oryza sativa	Os02t0320300-01	Os02g0320300	OsCHI1	III	OG4	CGTCA-motif	1004	1009	cis-acting regulatory element involved in the MeJA-responsiveness
Oryza sativa	Os02t0320300-01	Os02g0320300	OsCHI1	III	OG4	ARE	240	246	cis-acting regulatory element essential for the anaerobic induction
Oryza sativa	Os02t0320300-01	Os02g0320300	OsCHI1	III	OG4	ARE	345	351	cis-acting regulatory element essential for the anaerobic induction
Oryza sativa	Os02t0320300-01	Os02g0320300	OsCHI1	III	OG4	ARE	1440	1446	cis-acting regulatory element essential for the anaerobic induction
Oryza sativa	Os02t0320300-01	Os02g0320300	OsCHI1	III	OG4	ABRE	91	96	cis-acting element involved in the abscisic acid responsiveness
Oryza sativa	Os02t0320300-01	Os02g0320300	OsCHI1	III	OG4	ABRE	225	230	cis-acting element involved in the abscisic acid responsiveness
Oryza sativa	Os02t0320300-01	Os02g0320300	OsCHI1	III	OG4	O2-site	889	898	cis-acting regulatory element involved in zein metabolism regulation
Oryza sativa	Os02t0320300-01	Os02g0320300	OsCHI1	III	OG4	O2-site	981	990	cis-acting regulatory element involved in zein metabolism regulation
Oryza sativa	Os02t0320300-01	Os02g0320300	OsCHI1	III	OG4	HD-Zip 1	50	58	element involved in differentiation of the palisade mesophyll cells
Oryza sativa	Os02t0320300-01	Os02g0320300	OsCHI1	III	OG4	MBS	1249	1255	MYB binding site involved in drought-inducibility
Oryza sativa	Os02t0320300-01	Os02g0320300	OsCHI1	III	OG4	GT1-motif	1701	1707	light responsive element
Oryza sativa	Os02t0320300-01	Os02g0320300	OsCHI1	III	OG4	GTGGC-motif	627	637	part of a light responsive element
Oryza sativa	Os02t0320300-01	Os02g0320300	OsCHI1	III	OG4	GTGGC-motif	637	647	part of a light responsive element
Oryza sativa	Os02t0320300-01	Os02g0320300	OsCHI1	III	OG4	TGACG-motif	16	21	cis-acting regulatory element involved in the MeJA-responsiveness
Oryza sativa	Os02t0320300-01	Os02g0320300	OsCHI1	III	OG4	TGACG-motif	935	940	cis-acting regulatory element involved in the MeJA-responsiveness
Oryza sativa	Os02t0320300-01	Os02g0320300	OsCHI1	III	OG4	TGACG-motif	1004	1009	cis-acting regulatory element involved in the MeJA-responsiveness
Oryza sativa	Os02t0320300-01	Os02g0320300	OsCHI1	III	OG4	Box 4	1127	1133	part of a conserved DNA module involved in light responsiveness
Oryza sativa	Os02t0320300-01	Os02g0320300	OsCHI1	III	OG4	ATC-motif	904	913	part of a conserved DNA module involved in light responsiveness
Oryza sativa	Os02t0320300-01	Os02g0320300	OsCHI1	III	OG4	P-box	1550	1557	gibberellin-responsive element
Oryza sativa	Os02t0320300-01	Os02g0320300	OsCHI1	III	OG4	TCT-motif	117	123	part of a light responsive element
Oryza sativa	Os02t0320300-01	Os02g0320300	OsCHI1	III	OG4	TCT-motif	1420	1426	part of a light responsive element
Oryza sativa	Os02t0778500-01	Os02g0778500	OsCHI2	III	OG2	GATA-motif	1021	1028	part of a light responsive element
Oryza sativa	Os02t0778500-01	Os02g0778500	OsCHI2	III	OG2	TGACG-motif	270	275	cis-acting regulatory element involved in the MeJA-responsiveness
Oryza sativa	Os02t0778500-01	Os02g0778500	OsCHI2	III	OG2	TGACG-motif	1184	1189	cis-acting regulatory element involved in the MeJA-responsiveness
Oryza sativa	Os02t0778500-01	Os02g0778500	OsCHI2	III	OG2	TGACG-motif	1510	1515	cis-acting regulatory element involved in the MeJA-responsiveness
Oryza sativa	Os02t0778500-01	Os02g0778500	OsCHI2	III	OG2	TGACG-motif	1719	1724	cis-acting regulatory element involved in the MeJA-responsiveness
Oryza sativa	Os02t0778500-01	Os02g0778500	OsCHI2	III	OG2	GC-motif	1655	1661	enhancer-like element involved in anoxic specific inducibility
Oryza sativa	Os02t0778500-01	Os02g0778500	OsCHI2	III	OG2	O2-site	1507	1516	cis-acting regulatory element involved in zein metabolism regulation
Oryza sativa	Os02t0778500-01	Os02g0778500	OsCHI2	III	OG2	MBS	430	436	MYB binding site involved in drought-inducibility
Oryza sativa	Os02t0778500-01	Os02g0778500	OsCHI2	III	OG2	MBS	1301	1307	MYB binding site involved in drought-inducibility
Oryza sativa	Os02t0778500-01	Os02g0778500	OsCHI2	III	OG2	GT1-motif	1306	1313	light responsive element
Oryza sativa	Os02t0778500-01	Os02g0778500	OsCHI2	III	OG2	G-box	1387	1393	cis-acting regulatory element involved in light responsiveness
Oryza sativa	Os02t0778500-01	Os02g0778500	OsCHI2	III	OG2	G-box	1516	1522	cis-acting regulatory element involved in light responsiveness
Oryza sativa	Os02t0778500-01	Os02g0778500	OsCHI2	III	OG2	G-box	1918	1924	cis-acting regulatory element involved in light responsiveness
Oryza sativa	Os02t0778500-01	Os02g0778500	OsCHI2	III	OG2	ABRE	1388	1393	cis-acting element involved in the abscisic acid responsiveness
Oryza sativa	Os02t0778500-01	Os02g0778500	OsCHI2	III	OG2	ABRE	1516	1521	cis-acting element involved in the abscisic acid responsiveness
Oryza sativa	Os02t0778500-01	Os02g0778500	OsCHI2	III	OG2	ABRE	1622	1627	cis-acting element involved in the abscisic acid responsiveness
Oryza sativa	Os02t0778500-01	Os02g0778500	OsCHI2	III	OG2	ABRE	1717	1722	cis-acting element involved in the abscisic acid responsiveness
Oryza sativa	Os02t0778500-01	Os02g0778500	OsCHI2	III	OG2	ABRE	1918	1924	cis-acting element involved in the abscisic acid responsiveness
Oryza sativa	Os02t0778500-01	Os02g0778500	OsCHI2	III	OG2	ABRE	1919	1924	cis-acting element involved in the abscisic acid responsiveness
Oryza sativa	Os02t0778500-01	Os02g0778500	OsCHI2	III	OG2	Sp1	482	488	light responsive element
Oryza sativa	Os02t0778500-01	Os02g0778500	OsCHI2	III	OG2	Sp1	1940	1946	light responsive element
Oryza sativa	Os02t0778500-01	Os02g0778500	OsCHI2	III	OG2	ARE	913	919	cis-acting regulatory element essential for the anaerobic induction
Oryza sativa	Os02t0778500-01	Os02g0778500	OsCHI2	III	OG2	ARE	1401	1407	cis-acting regulatory element essential for the anaerobic induction
Oryza sativa	Os02t0778500-01	Os02g0778500	OsCHI2	III	OG2	G-box	1622	1628	cis-acting regulatory element involved in light responsiveness
Oryza sativa	Os02t0778500-01	Os02g0778500	OsCHI2	III	OG2	G-box	1717	1723	cis-acting regulatory element involved in light responsiveness
Oryza sativa	Os02t0778500-01	Os02g0778500	OsCHI2	III	OG2	G-box	1918	1924	cis-acting regulatory element involved in light responsiveness
Oryza sativa	Os02t0778500-01	Os02g0778500	OsCHI2	III	OG2	Box II	1515	1524	part of a light responsive element
Oryza sativa	Os02t0778500-01	Os02g0778500	OsCHI2	III	OG2	CGTCA-motif	270	275	cis-acting regulatory element involved in the MeJA-responsiveness
Oryza sativa	Os02t0778500-01	Os02g0778500	OsCHI2	III	OG2	CGTCA-motif	1184	1189	cis-acting regulatory element involved in the MeJA-responsiveness
Oryza sativa	Os02t0778500-01	Os02g0778500	OsCHI2	III	OG2	CGTCA-motif	1510	1515	cis-acting regulatory element involved in the MeJA-responsiveness
Oryza sativa	Os02t0778500-01	Os02g0778500	OsCHI2	III	OG2	CGTCA-motif	1719	1724	cis-acting regulatory element involved in the MeJA-responsiveness
Oryza sativa	Os03t0819600-01	Os03g0819600	OsCHI3	I	OG1	AuxRR-core	1128	1135	cis-acting regulatory element involved in auxin responsiveness
Oryza sativa	Os03t0819600-01	Os03g0819600	OsCHI3	I	OG1	CGTCA-motif	387	392	cis-acting regulatory element involved in the MeJA-responsiveness
Oryza sativa	Os03t0819600-01	Os03g0819600	OsCHI3	I	OG1	CGTCA-motif	977	982	cis-acting regulatory element involved in the MeJA-responsiveness
Oryza sativa	Os03t0819600-01	Os03g0819600	OsCHI3	I	OG1	G-box	1088	1094	cis-acting regulatory element involved in light responsiveness
Oryza sativa	Os03t0819600-01	Os03g0819600	OsCHI3	I	OG1	ARE	367	373	cis-acting regulatory element essential for the anaerobic induction
Oryza sativa	Os03t0819600-01	Os03g0819600	OsCHI3	I	OG1	ABRE	1088	1093	cis-acting element involved in the abscisic acid responsiveness
Oryza sativa	Os03t0819600-01	Os03g0819600	OsCHI3	I	OG1	ABRE	1131	1138	cis-acting element involved in the abscisic acid responsiveness
Oryza sativa	Os03t0819600-01	Os03g0819600	OsCHI3	I	OG1	MBS	565	571	MYB binding site involved in drought-inducibility
Oryza sativa	Os03t0819600-01	Os03g0819600	OsCHI3	I	OG1	MBS	1980	1986	MYB binding site involved in drought-inducibility
Oryza sativa	Os03t0819600-01	Os03g0819600	OsCHI3	I	OG1	GC-motif	1960	1966	enhancer-like element involved in anoxic specific inducibility
Oryza sativa	Os03t0819600-01	Os03g0819600	OsCHI3	I	OG1	circadian	1635	1645	cis-acting regulatory element involved in circadian control
Oryza sativa	Os03t0819600-01	Os03g0819600	OsCHI3	I	OG1	TGACG-motif	387	392	cis-acting regulatory element involved in the MeJA-responsiveness
Oryza sativa	Os03t0819600-01	Os03g0819600	OsCHI3	I	OG1	TGACG-motif	977	982	cis-acting regulatory element involved in the MeJA-responsiveness
Oryza sativa	Os03t0819600-01	Os03g0819600	OsCHI3	I	OG1	Box 4	859	865	part of a conserved DNA module involved in light responsiveness
Oryza sativa	Os03t0819600-01	Os03g0819600	OsCHI3	I	OG1	Box 4	1009	1015	part of a conserved DNA module involved in light responsiveness
Oryza sativa	Os03t0819600-01	Os03g0819600	OsCHI3	I	OG1	CAT-box	120	126	cis-acting regulatory element related to meristem expression
Oryza sativa	Os03t0819600-01	Os03g0819600	OsCHI3	I	OG1	CAT-box	538	544	cis-acting regulatory element related to meristem expression
Oryza sativa	Os03t0819600-01	Os03g0819600	OsCHI3	I	OG1	CAT-box	1532	1538	cis-acting regulatory element related to meristem expression
Oryza sativa	Os03t0819600-01	Os03g0819600	OsCHI3	I	OG1	CAT-box	1814	1820	cis-acting regulatory element related to meristem expression
Oryza sativa	Os03t0819600-01	Os03g0819600	OsCHI3	I	OG1	TCT-motif	84	90	part of a light responsive element
Oryza sativa	Os03t0819600-01	Os03g0819600	OsCHI3	I	OG1	TCT-motif	684	690	part of a light responsive element
Oryza sativa	Os03t0819600-01	Os03g0819600	OsCHI3	I	OG1	TCT-motif	1695	1701	part of a light responsive element
Oryza sativa	Os06t0203600-01	Os06g0203600	OsCHI4	III	OG2	GT1-motif	153	159	light responsive element
Oryza sativa	Os06t0203600-01	Os06g0203600	OsCHI4	III	OG2	GT1-motif	461	467	light responsive element
Oryza sativa	Os06t0203600-01	Os06g0203600	OsCHI4	III	OG2	GT1-motif	1727	1734	light responsive element
Oryza sativa	Os06t0203600-01	Os06g0203600	OsCHI4	III	OG2	GT1-motif	1728	1734	light responsive element
Oryza sativa	Os06t0203600-01	Os06g0203600	OsCHI4	III	OG2	LTR	1812	1818	cis-acting element involved in low-temperature responsiveness
Oryza sativa	Os06t0203600-01	Os06g0203600	OsCHI4	III	OG2	O2-site	831	840	cis-acting regulatory element involved in zein metabolism regulation
Oryza sativa	Os06t0203600-01	Os06g0203600	OsCHI4	III	OG2	GC-motif	1776	1782	enhancer-like element involved in anoxic specific inducibility
Oryza sativa	Os06t0203600-01	Os06g0203600	OsCHI4	III	OG2	GC-motif	1793	1799	enhancer-like element involved in anoxic specific inducibility
Oryza sativa	Os06t0203600-01	Os06g0203600	OsCHI4	III	OG2	GA-motif	1202	1210	part of a light responsive element
Oryza sativa	Os06t0203600-01	Os06g0203600	OsCHI4	III	OG2	GCN4_motif	1073	1080	cis-regulatory element involved in endosperm expression
Oryza sativa	Os06t0203600-01	Os06g0203600	OsCHI4	III	OG2	G-box	1621	1627	cis-acting regulatory element involved in light responsiveness
Oryza sativa	Os06t0203600-01	Os06g0203600	OsCHI4	III	OG2	G-box	1664	1670	cis-acting regulatory element involved in light responsiveness
Oryza sativa	Os06t0203600-01	Os06g0203600	OsCHI4	III	OG2	G-box	1894	1900	cis-acting regulatory element involved in light responsiveness
Oryza sativa	Os06t0203600-01	Os06g0203600	OsCHI4	III	OG2	GATA-motif	1513	1520	part of a light responsive element
Oryza sativa	Os06t0203600-01	Os06g0203600	OsCHI4	III	OG2	L-box	1804	1813	part of a light responsive element
Oryza sativa	Os06t0203600-01	Os06g0203600	OsCHI4	III	OG2	TCT-motif	1829	1835	part of a light responsive element
Oryza sativa	Os06t0203600-01	Os06g0203600	OsCHI4	III	OG2	TGACG-motif	1438	1443	cis-acting regulatory element involved in the MeJA-responsiveness
Oryza sativa	Os06t0203600-01	Os06g0203600	OsCHI4	III	OG2	TGACG-motif	1898	1903	cis-acting regulatory element involved in the MeJA-responsiveness
Oryza sativa	Os06t0203600-01	Os06g0203600	OsCHI4	III	OG2	Box 4	1252	1258	part of a conserved DNA module involved in light responsiveness
Oryza sativa	Os06t0203600-01	Os06g0203600	OsCHI4	III	OG2	CGTCA-motif	1438	1443	cis-acting regulatory element involved in the MeJA-responsiveness
Oryza sativa	Os06t0203600-01	Os06g0203600	OsCHI4	III	OG2	CGTCA-motif	1898	1903	cis-acting regulatory element involved in the MeJA-responsiveness
Oryza sativa	Os06t0203600-01	Os06g0203600	OsCHI4	III	OG2	Gap-box	236	245.5	part of a light responsive element
Oryza sativa	Os06t0203600-01	Os06g0203600	OsCHI4	III	OG2	TCA-element	611	620	cis-acting element involved in salicylic acid responsiveness
Oryza sativa	Os06t0203600-01	Os06g0203600	OsCHI4	III	OG2	TCA-element	986	995	cis-acting element involved in salicylic acid responsiveness
Oryza sativa	Os06t0203600-01	Os06g0203600	OsCHI4	III	OG2	TCA-element	1363	1372	cis-acting element involved in salicylic acid responsiveness
Oryza sativa	Os06t0203600-01	Os06g0203600	OsCHI4	III	OG2	G-box	1620	1628	cis-acting regulatory element involved in light responsiveness
Oryza sativa	Os06t0203600-01	Os06g0203600	OsCHI4	III	OG2	G-box	1621	1627	cis-acting regulatory element involved in light responsiveness
Oryza sativa	Os06t0203600-01	Os06g0203600	OsCHI4	III	OG2	G-box	1662	1670	cis-acting regulatory element involved in light responsiveness
Oryza sativa	Os06t0203600-01	Os06g0203600	OsCHI4	III	OG2	G-box	1894	1900	cis-acting regulatory element involved in light responsiveness
Oryza sativa	Os06t0203600-01	Os06g0203600	OsCHI4	III	OG2	AuxRR-core	1653	1660	cis-acting regulatory element involved in auxin responsiveness
Oryza sativa	Os06t0203600-01	Os06g0203600	OsCHI4	III	OG2	ABRE	1621	1627	cis-acting element involved in the abscisic acid responsiveness
Oryza sativa	Os06t0203600-01	Os06g0203600	OsCHI4	III	OG2	ABRE	1622	1627	cis-acting element involved in the abscisic acid responsiveness
Oryza sativa	Os06t0203600-01	Os06g0203600	OsCHI4	III	OG2	ABRE	1665	1670	cis-acting element involved in the abscisic acid responsiveness
Oryza sativa	Os06t0203600-01	Os06g0203600	OsCHI4	III	OG2	ABRE	1892	1901	cis-acting element involved in the abscisic acid responsiveness
Oryza sativa	Os06t0203600-01	Os06g0203600	OsCHI4	III	OG2	ABRE	1894	1900	cis-acting element involved in the abscisic acid responsiveness
Oryza sativa	Os06t0203600-01	Os06g0203600	OsCHI4	III	OG2	ABRE	1895	1900	cis-acting element involved in the abscisic acid responsiveness
Oryza sativa	Os06t0203600-01	Os06g0203600	OsCHI4	III	OG2	MRE	290	297	MYB binding site involved in light responsiveness
Oryza sativa	Os06t0203600-01	Os06g0203600	OsCHI4	III	OG2	MRE	686	693	MYB binding site involved in light responsiveness
Oryza sativa	Os06t0203600-01	Os06g0203600	OsCHI4	III	OG2	MRE	1214	1221	MYB binding site involved in light responsiveness
Oryza sativa	Os06t0203600-01	Os06g0203600	OsCHI4	III	OG2	MRE	1476	1483	MYB binding site involved in light responsiveness
Oryza sativa	Os06t0203600-01	Os06g0203600	OsCHI4	III	OG2	ARE	244	250	cis-acting regulatory element essential for the anaerobic induction
Oryza sativa	Os06t0203600-01	Os06g0203600	OsCHI4	III	OG2	ARE	1815	1821	cis-acting regulatory element essential for the anaerobic induction
Oryza sativa	Os07t0571600-00	Os07g0571600	OsCHI5	III	OG5	RY-element	355	363	cis-acting regulatory element involved in seed-specific regulation
Oryza sativa	Os07t0571600-00	Os07g0571600	OsCHI5	III	OG5	TCA-element	1029	1038	cis-acting element involved in salicylic acid responsiveness
Oryza sativa	Os07t0571600-00	Os07g0571600	OsCHI5	III	OG5	CGTCA-motif	756	761	cis-acting regulatory element involved in the MeJA-responsiveness
Oryza sativa	Os07t0571600-00	Os07g0571600	OsCHI5	III	OG5	CGTCA-motif	1209	1214	cis-acting regulatory element involved in the MeJA-responsiveness
Oryza sativa	Os07t0571600-00	Os07g0571600	OsCHI5	III	OG5	CGTCA-motif	1364	1369	cis-acting regulatory element involved in the MeJA-responsiveness
Oryza sativa	Os07t0571600-00	Os07g0571600	OsCHI5	III	OG5	CGTCA-motif	1555	1560	cis-acting regulatory element involved in the MeJA-responsiveness
Oryza sativa	Os07t0571600-00	Os07g0571600	OsCHI5	III	OG5	ARE	1841	1847	cis-acting regulatory element essential for the anaerobic induction
Oryza sativa	Os07t0571600-00	Os07g0571600	OsCHI5	III	OG5	ABRE	1836	1841	cis-acting element involved in the abscisic acid responsiveness
Oryza sativa	Os07t0571600-00	Os07g0571600	OsCHI5	III	OG5	G-box	1836	1842	cis-acting regulatory element involved in light responsiveness
Oryza sativa	Os07t0571600-00	Os07g0571600	OsCHI5	III	OG5	TCCC-motif	328	335	part of a light responsive element
Oryza sativa	Os07t0571600-00	Os07g0571600	OsCHI5	III	OG5	AE-box	1657	1665	part of a module for light response
Oryza sativa	Os07t0571600-00	Os07g0571600	OsCHI5	III	OG5	chs-CMA1a	620	628	part of a light responsive element
Oryza sativa	Os07t0571600-00	Os07g0571600	OsCHI5	III	OG5	LTR	146	152	cis-acting element involved in low-temperature responsiveness
Oryza sativa	Os07t0571600-00	Os07g0571600	OsCHI5	III	OG5	GT1-motif	1852	1858	light responsive element
Oryza sativa	Os07t0571600-00	Os07g0571600	OsCHI5	III	OG5	MBS	422	428	MYB binding site involved in drought-inducibility
Oryza sativa	Os07t0571600-00	Os07g0571600	OsCHI5	III	OG5	TGA-element	751	757	auxin-responsive element
Oryza sativa	Os07t0571600-00	Os07g0571600	OsCHI5	III	OG5	Box 4	630	636	part of a conserved DNA module involved in light responsiveness
Oryza sativa	Os07t0571600-00	Os07g0571600	OsCHI5	III	OG5	Box 4	1601	1607	part of a conserved DNA module involved in light responsiveness
Oryza sativa	Os07t0571600-00	Os07g0571600	OsCHI5	III	OG5	TGACG-motif	756	761	cis-acting regulatory element involved in the MeJA-responsiveness
Oryza sativa	Os07t0571600-00	Os07g0571600	OsCHI5	III	OG5	TGACG-motif	1209	1214	cis-acting regulatory element involved in the MeJA-responsiveness
Oryza sativa	Os07t0571600-00	Os07g0571600	OsCHI5	III	OG5	TGACG-motif	1364	1369	cis-acting regulatory element involved in the MeJA-responsiveness
Oryza sativa	Os07t0571600-00	Os07g0571600	OsCHI5	III	OG5	TGACG-motif	1555	1560	cis-acting regulatory element involved in the MeJA-responsiveness
Oryza sativa	Os07t0571600-00	Os07g0571600	OsCHI5	III	OG5	CAT-box	236	242	cis-acting regulatory element related to meristem expression
Oryza sativa	Os07t0571600-00	Os07g0571600	OsCHI5	III	OG5	GATA-motif	1455	1462	part of a light responsive element
Oryza sativa	Os11t0116300-01	Os11g0116300	OsCHI6	IV	OG3	TCCC-motif	425	432	part of a light responsive element
Oryza sativa	Os11t0116300-01	Os11g0116300	OsCHI6	IV	OG3	G-box	671	677	cis-acting regulatory element involved in light responsiveness
Oryza sativa	Os11t0116300-01	Os11g0116300	OsCHI6	IV	OG3	TGA-element	199	205	auxin-responsive element
Oryza sativa	Os11t0116300-01	Os11g0116300	OsCHI6	IV	OG3	chs-CMA2a	491	499	part of a light responsive element
Oryza sativa	Os11t0116300-01	Os11g0116300	OsCHI6	IV	OG3	LTR	1866	1872	cis-acting element involved in low-temperature responsiveness
Oryza sativa	Os11t0116300-01	Os11g0116300	OsCHI6	IV	OG3	Box 4	1449	1455	part of a conserved DNA module involved in light responsiveness
Oryza sativa	Os11t0116300-01	Os11g0116300	OsCHI6	IV	OG3	Box 4	1485	1491	part of a conserved DNA module involved in light responsiveness
Oryza sativa	Os11t0116300-01	Os11g0116300	OsCHI6	IV	OG3	Box 4	1666	1672	part of a conserved DNA module involved in light responsiveness
Oryza sativa	Os11t0116300-01	Os11g0116300	OsCHI6	IV	OG3	TGACG-motif	471	476	cis-acting regulatory element involved in the MeJA-responsiveness
Oryza sativa	Os11t0116300-01	Os11g0116300	OsCHI6	IV	OG3	P-box	646	653	gibberellin-responsive element
Oryza sativa	Os11t0116300-01	Os11g0116300	OsCHI6	IV	OG3	CAT-box	414	420	cis-acting regulatory element related to meristem expression
Oryza sativa	Os11t0116300-01	Os11g0116300	OsCHI6	IV	OG3	CAT-box	725	731	cis-acting regulatory element related to meristem expression
Oryza sativa	Os11t0116300-01	Os11g0116300	OsCHI6	IV	OG3	GATA-motif	114	124	part of a light responsive element
Oryza sativa	Os11t0116300-01	Os11g0116300	OsCHI6	IV	OG3	GATA-motif	311	320	part of a light responsive element
Oryza sativa	Os11t0116300-01	Os11g0116300	OsCHI6	IV	OG3	GATA-motif	1695	1705	part of a light responsive element
Oryza sativa	Os11t0116300-01	Os11g0116300	OsCHI6	IV	OG3	G-box	353	359	cis-acting regulatory element involved in light responsiveness
Oryza sativa	Os11t0116300-01	Os11g0116300	OsCHI6	IV	OG3	G-box	1283	1289	cis-acting regulatory element involved in light responsiveness
Oryza sativa	Os11t0116300-01	Os11g0116300	OsCHI6	IV	OG3	CGTCA-motif	471	476	cis-acting regulatory element involved in the MeJA-responsiveness
Oryza sativa	Os11t0116300-01	Os11g0116300	OsCHI6	IV	OG3	ARE	958	964	cis-acting regulatory element essential for the anaerobic induction
Oryza sativa	Os11t0116300-01	Os11g0116300	OsCHI6	IV	OG3	Sp1	379	385	light responsive element
Oryza sativa	Os11t0116300-01	Os11g0116300	OsCHI6	IV	OG3	Sp1	998	1004	light responsive element
Oryza sativa	Os11t0116300-01	Os11g0116300	OsCHI6	IV	OG3	Sp1	1034	1040	light responsive element
Oryza sativa	Os11t0116300-01	Os11g0116300	OsCHI6	IV	OG3	ABRE	671	676	cis-acting element involved in the abscisic acid responsiveness
Oryza sativa	Os12t0115700-01	Os12g0115700	OsCHI7	IV	OG3	Sp1	892	898	light responsive element
Oryza sativa	Os12t0115700-01	Os12g0115700	OsCHI7	IV	OG3	Sp1	933	939	light responsive element
Oryza sativa	Os12t0115700-01	Os12g0115700	OsCHI7	IV	OG3	Sp1	983	989	light responsive element
Oryza sativa	Os12t0115700-01	Os12g0115700	OsCHI7	IV	OG3	Sp1	1016	1022	light responsive element
Oryza sativa	Os12t0115700-01	Os12g0115700	OsCHI7	IV	OG3	Sp1	1053	1059	light responsive element
Oryza sativa	Os12t0115700-01	Os12g0115700	OsCHI7	IV	OG3	Sp1	1066	1072	light responsive element
Oryza sativa	Os12t0115700-01	Os12g0115700	OsCHI7	IV	OG3	ABRE	1142	1147	cis-acting element involved in the abscisic acid responsiveness
Oryza sativa	Os12t0115700-01	Os12g0115700	OsCHI7	IV	OG3	ABRE	1286	1293	cis-acting element involved in the abscisic acid responsiveness
Oryza sativa	Os12t0115700-01	Os12g0115700	OsCHI7	IV	OG3	MRE	1940	1947	MYB binding site involved in light responsiveness
Oryza sativa	Os12t0115700-01	Os12g0115700	OsCHI7	IV	OG3	ARE	748	754	cis-acting regulatory element essential for the anaerobic induction
Oryza sativa	Os12t0115700-01	Os12g0115700	OsCHI7	IV	OG3	ARE	1008	1014	cis-acting regulatory element essential for the anaerobic induction
Oryza sativa	Os12t0115700-01	Os12g0115700	OsCHI7	IV	OG3	ARE	1546	1552	cis-acting regulatory element essential for the anaerobic induction
Oryza sativa	Os12t0115700-01	Os12g0115700	OsCHI7	IV	OG3	ATCT-motif	1761	1770	part of a conserved DNA module involved in light responsiveness
Oryza sativa	Os12t0115700-01	Os12g0115700	OsCHI7	IV	OG3	G-box	285	291	cis-acting regulatory element involved in light responsiveness
Oryza sativa	Os12t0115700-01	Os12g0115700	OsCHI7	IV	OG3	G-box	1142	1148	cis-acting regulatory element involved in light responsiveness
Oryza sativa	Os12t0115700-01	Os12g0115700	OsCHI7	IV	OG3	CGTCA-motif	1144	1149	cis-acting regulatory element involved in the MeJA-responsiveness
Oryza sativa	Os12t0115700-01	Os12g0115700	OsCHI7	IV	OG3	TCA-element	696	705	cis-acting element involved in salicylic acid responsiveness
Oryza sativa	Os12t0115700-01	Os12g0115700	OsCHI7	IV	OG3	TC-rich repeats	674	683	cis-acting element involved in defense and stress responsiveness
Oryza sativa	Os12t0115700-01	Os12g0115700	OsCHI7	IV	OG3	P-box	937	944	gibberellin-responsive element
Oryza sativa	Os12t0115700-01	Os12g0115700	OsCHI7	IV	OG3	P-box	1020	1027	gibberellin-responsive element
Oryza sativa	Os12t0115700-01	Os12g0115700	OsCHI7	IV	OG3	TGACG-motif	1144	1149	cis-acting regulatory element involved in the MeJA-responsiveness
Oryza sativa	Os12t0115700-01	Os12g0115700	OsCHI7	IV	OG3	GC-motif	85	91	enhancer-like element involved in anoxic specific inducibility
Oryza sativa	Os12t0115700-01	Os12g0115700	OsCHI7	IV	OG3	GC-motif	952	958	enhancer-like element involved in anoxic specific inducibility
Oryza sativa	Os12t0115700-01	Os12g0115700	OsCHI7	IV	OG3	GC-motif	1035	1041	enhancer-like element involved in anoxic specific inducibility
Oryza sativa	Os12t0115700-01	Os12g0115700	OsCHI7	IV	OG3	LTR	1578	1584	cis-acting element involved in low-temperature responsiveness
Populus trichocarpa	PNS90718	POPTR_019G057800v3	PtCHI6	IV	OG3	TGACG-motif	577	582	cis-acting regulatory element involved in the MeJA-responsiveness
Populus trichocarpa	PNS90718	POPTR_019G057800v3	PtCHI6	IV	OG3	Box 4	1451	1457	part of a conserved DNA module involved in light responsiveness
Populus trichocarpa	PNS90718	POPTR_019G057800v3	PtCHI6	IV	OG3	Box 4	1501	1507	part of a conserved DNA module involved in light responsiveness
Populus trichocarpa	PNS90718	POPTR_019G057800v3	PtCHI6	IV	OG3	3-AF1 binding site	1946	1956	light responsive element
Populus trichocarpa	PNS90718	POPTR_019G057800v3	PtCHI6	IV	OG3	CAT-box	1571	1577	cis-acting regulatory element related to meristem expression
Populus trichocarpa	PNS90718	POPTR_019G057800v3	PtCHI6	IV	OG3	GATA-motif	1246	1255	part of a light responsive element
Populus trichocarpa	PNS90718	POPTR_019G057800v3	PtCHI6	IV	OG3	L-box	752	761	part of a light responsive element
Populus trichocarpa	PNS90718	POPTR_019G057800v3	PtCHI6	IV	OG3	L-box	934	944	part of a light responsive element
Populus trichocarpa	PNS90718	POPTR_019G057800v3	PtCHI6	IV	OG3	L-box	935	944	part of a light responsive element
Populus trichocarpa	PNS90718	POPTR_019G057800v3	PtCHI6	IV	OG3	TCT-motif	1945	1951	part of a light responsive element
Populus trichocarpa	PNS90718	POPTR_019G057800v3	PtCHI6	IV	OG3	G-box	152	158	cis-acting regulatory element involved in light responsiveness
Populus trichocarpa	PNS90718	POPTR_019G057800v3	PtCHI6	IV	OG3	G-box	1264	1270	cis-acting regulatory element involved in light responsiveness
Populus trichocarpa	PNS90718	POPTR_019G057800v3	PtCHI6	IV	OG3	G-box	1649	1655	cis-acting regulatory element involved in light responsiveness
Populus trichocarpa	PNS90718	POPTR_019G057800v3	PtCHI6	IV	OG3	GT1-motif	170	177	light responsive element
Populus trichocarpa	PNS90718	POPTR_019G057800v3	PtCHI6	IV	OG3	GT1-motif	171	177	light responsive element
Populus trichocarpa	PNS90718	POPTR_019G057800v3	PtCHI6	IV	OG3	TGA-element	1590	1596	auxin-responsive element
Populus trichocarpa	PNS90718	POPTR_019G057800v3	PtCHI6	IV	OG3	ARE	205	211	cis-acting regulatory element essential for the anaerobic induction
Populus trichocarpa	PNS90718	POPTR_019G057800v3	PtCHI6	IV	OG3	ARE	785	791	cis-acting regulatory element essential for the anaerobic induction
Populus trichocarpa	PNS90718	POPTR_019G057800v3	PtCHI6	IV	OG3	ARE	1189	1195	cis-acting regulatory element essential for the anaerobic induction
Populus trichocarpa	PNS90718	POPTR_019G057800v3	PtCHI6	IV	OG3	ABRE	152	158	cis-acting element involved in the abscisic acid responsiveness
Populus trichocarpa	PNS90718	POPTR_019G057800v3	PtCHI6	IV	OG3	ABRE	153	158	cis-acting element involved in the abscisic acid responsiveness
Populus trichocarpa	PNS90718	POPTR_019G057800v3	PtCHI6	IV	OG3	ABRE	1265	1270	cis-acting element involved in the abscisic acid responsiveness
Populus trichocarpa	PNS90718	POPTR_019G057800v3	PtCHI6	IV	OG3	ABRE	1649	1654	cis-acting element involved in the abscisic acid responsiveness
Populus trichocarpa	PNS90718	POPTR_019G057800v3	PtCHI6	IV	OG3	CGTCA-motif	577	582	cis-acting regulatory element involved in the MeJA-responsiveness
Populus trichocarpa	PNS90718	POPTR_019G057800v3	PtCHI6	IV	OG3	TCA-element	430	439	cis-acting element involved in salicylic acid responsiveness
Populus trichocarpa	PNS90718	POPTR_019G057800v3	PtCHI6	IV	OG3	G-box	152	158	cis-acting regulatory element involved in light responsiveness
Populus trichocarpa	PNS90718	POPTR_019G057800v3	PtCHI6	IV	OG3	ATCT-motif	1484	1493	part of a conserved DNA module involved in light responsiveness
Populus trichocarpa	PNS92694	POPTR_018G048500v3	PtCHI5	III	OG2	TCA-element	573	582	cis-acting element involved in salicylic acid responsiveness
Populus trichocarpa	PNS92694	POPTR_018G048500v3	PtCHI5	III	OG2	G-box	1634	1640	cis-acting regulatory element involved in light responsiveness
Populus trichocarpa	PNS92694	POPTR_018G048500v3	PtCHI5	III	OG2	Box II	919	928	part of a light responsive element
Populus trichocarpa	PNS92694	POPTR_018G048500v3	PtCHI5	III	OG2	MRE	239	246	MYB binding site involved in light responsiveness
Populus trichocarpa	PNS92694	POPTR_018G048500v3	PtCHI5	III	OG2	ARE	550	556	cis-acting regulatory element essential for the anaerobic induction
Populus trichocarpa	PNS92694	POPTR_018G048500v3	PtCHI5	III	OG2	ARE	603	609	cis-acting regulatory element essential for the anaerobic induction
Populus trichocarpa	PNS92694	POPTR_018G048500v3	PtCHI5	III	OG2	ABRE	1634	1639	cis-acting element involved in the abscisic acid responsiveness
Populus trichocarpa	PNS92694	POPTR_018G048500v3	PtCHI5	III	OG2	chs-CMA1a	1591	1599	part of a light responsive element
Populus trichocarpa	PNS92694	POPTR_018G048500v3	PtCHI5	III	OG2	AE-box	135	143	part of a module for light response
Populus trichocarpa	PNS92694	POPTR_018G048500v3	PtCHI5	III	OG2	AE-box	1952	1960	part of a module for light response
Populus trichocarpa	PNS92694	POPTR_018G048500v3	PtCHI5	III	OG2	GT1-motif	349	355	light responsive element
Populus trichocarpa	PNS92694	POPTR_018G048500v3	PtCHI5	III	OG2	AT1-motif	1264	1277	part of a light responsive module
Populus trichocarpa	PNS92694	POPTR_018G048500v3	PtCHI5	III	OG2	O2-site	1190	1198	cis-acting regulatory element involved in zein metabolism regulation
Populus trichocarpa	PNS92694	POPTR_018G048500v3	PtCHI5	III	OG2	TGA-element	405	411	auxin-responsive element
Populus trichocarpa	PNS92694	POPTR_018G048500v3	PtCHI5	III	OG2	Box 4	808	814	part of a conserved DNA module involved in light responsiveness
Populus trichocarpa	PNS92694	POPTR_018G048500v3	PtCHI5	III	OG2	Box 4	1235	1241	part of a conserved DNA module involved in light responsiveness
Populus trichocarpa	PNS92694	POPTR_018G048500v3	PtCHI5	III	OG2	Box 4	1287	1293	part of a conserved DNA module involved in light responsiveness
Populus trichocarpa	PNS92694	POPTR_018G048500v3	PtCHI5	III	OG2	Box 4	1692	1698	part of a conserved DNA module involved in light responsiveness
Populus trichocarpa	PNS92694	POPTR_018G048500v3	PtCHI5	III	OG2	TCT-motif	1041	1047	part of a light responsive element
Populus trichocarpa	PNT12708	POPTR_011G101800v3	PtCHI4	III	OG4	Box 4	668	674	part of a conserved DNA module involved in light responsiveness
Populus trichocarpa	PNT12708	POPTR_011G101800v3	PtCHI4	III	OG4	Box 4	1531	1537	part of a conserved DNA module involved in light responsiveness
Populus trichocarpa	PNT12708	POPTR_011G101800v3	PtCHI4	III	OG4	Box 4	1714	1720	part of a conserved DNA module involved in light responsiveness
Populus trichocarpa	PNT12708	POPTR_011G101800v3	PtCHI4	III	OG4	L-box	1985	1993	part of a light responsive element
Populus trichocarpa	PNT12708	POPTR_011G101800v3	PtCHI4	III	OG4	P-box	3	10	gibberellin-responsive element
Populus trichocarpa	PNT12708	POPTR_011G101800v3	PtCHI4	III	OG4	P-box	1440	1447	gibberellin-responsive element
Populus trichocarpa	PNT12708	POPTR_011G101800v3	PtCHI4	III	OG4	G-box	945	951	cis-acting regulatory element involved in light responsiveness
Populus trichocarpa	PNT12708	POPTR_011G101800v3	PtCHI4	III	OG4	chs-CMA1a	1239	1247	part of a light responsive element
Populus trichocarpa	PNT12708	POPTR_011G101800v3	PtCHI4	III	OG4	AE-box	474	482	part of a module for light response
Populus trichocarpa	PNT12708	POPTR_011G101800v3	PtCHI4	III	OG4	GT1-motif	369	376	light responsive element
Populus trichocarpa	PNT12708	POPTR_011G101800v3	PtCHI4	III	OG4	LTR	1954	1960	cis-acting element involved in low-temperature responsiveness
Populus trichocarpa	PNT12708	POPTR_011G101800v3	PtCHI4	III	OG4	TGA-element	1357	1363	auxin-responsive element
Populus trichocarpa	PNT12708	POPTR_011G101800v3	PtCHI4	III	OG4	ARE	8	14	cis-acting regulatory element essential for the anaerobic induction
Populus trichocarpa	PNT12708	POPTR_011G101800v3	PtCHI4	III	OG4	ARE	518	524	cis-acting regulatory element essential for the anaerobic induction
Populus trichocarpa	PNT12708	POPTR_011G101800v3	PtCHI4	III	OG4	ARE	700	706	cis-acting regulatory element essential for the anaerobic induction
Populus trichocarpa	PNT12708	POPTR_011G101800v3	PtCHI4	III	OG4	ARE	881	887	cis-acting regulatory element essential for the anaerobic induction
Populus trichocarpa	PNT12708	POPTR_011G101800v3	PtCHI4	III	OG4	ARE	1336	1342	cis-acting regulatory element essential for the anaerobic induction
Populus trichocarpa	PNT12708	POPTR_011G101800v3	PtCHI4	III	OG4	ARE	1950	1956	cis-acting regulatory element essential for the anaerobic induction
Populus trichocarpa	PNT12708	POPTR_011G101800v3	PtCHI4	III	OG4	ABRE	366	373	cis-acting element involved in the abscisic acid responsiveness
Populus trichocarpa	PNT12708	POPTR_011G101800v3	PtCHI4	III	OG4	ABRE	376	383	cis-acting element involved in the abscisic acid responsiveness
Populus trichocarpa	PNT12708	POPTR_011G101800v3	PtCHI4	III	OG4	ABRE	396	403	cis-acting element involved in the abscisic acid responsiveness
Populus trichocarpa	PNT12708	POPTR_011G101800v3	PtCHI4	III	OG4	ABRE	412	419	cis-acting element involved in the abscisic acid responsiveness
Populus trichocarpa	PNT12708	POPTR_011G101800v3	PtCHI4	III	OG4	ABRE	451	458	cis-acting element involved in the abscisic acid responsiveness
Populus trichocarpa	PNT12708	POPTR_011G101800v3	PtCHI4	III	OG4	ABRE	945	951	cis-acting element involved in the abscisic acid responsiveness
Populus trichocarpa	PNT12708	POPTR_011G101800v3	PtCHI4	III	OG4	ABRE	946	951	cis-acting element involved in the abscisic acid responsiveness
Populus trichocarpa	PNT12708	POPTR_011G101800v3	PtCHI4	III	OG4	ABRE	1048	1056	cis-acting element involved in the abscisic acid responsiveness
Populus trichocarpa	PNT12708	POPTR_011G101800v3	PtCHI4	III	OG4	ABRE	1049	1054	cis-acting element involved in the abscisic acid responsiveness
Populus trichocarpa	PNT12708	POPTR_011G101800v3	PtCHI4	III	OG4	TATC-box	188	195	cis-acting element involved in gibberellin-responsiveness
Populus trichocarpa	PNT12708	POPTR_011G101800v3	PtCHI4	III	OG4	TATC-box	254	261	cis-acting element involved in gibberellin-responsiveness
Populus trichocarpa	PNT12708	POPTR_011G101800v3	PtCHI4	III	OG4	ACE	1046	1056	cis-acting element involved in light responsiveness
Populus trichocarpa	PNT12708	POPTR_011G101800v3	PtCHI4	III	OG4	AAAC-motif	1130	1141	light responsive element
Populus trichocarpa	PNT12708	POPTR_011G101800v3	PtCHI4	III	OG4	G-box	944	952	cis-acting regulatory element involved in light responsiveness
Populus trichocarpa	PNT12708	POPTR_011G101800v3	PtCHI4	III	OG4	G-box	945	951	cis-acting regulatory element involved in light responsiveness
Populus trichocarpa	PNT12708	POPTR_011G101800v3	PtCHI4	III	OG4	G-box	1048	1054	cis-acting regulatory element involved in light responsiveness
Populus trichocarpa	PNT17879	POPTR_010G213000v3	PtCHI3	I	OG1	ABRE	1810	1816	cis-acting element involved in the abscisic acid responsiveness
Populus trichocarpa	PNT17879	POPTR_010G213000v3	PtCHI3	I	OG1	ABRE	1811	1816	cis-acting element involved in the abscisic acid responsiveness
Populus trichocarpa	PNT17879	POPTR_010G213000v3	PtCHI3	I	OG1	ARE	228	234	cis-acting regulatory element essential for the anaerobic induction
Populus trichocarpa	PNT17879	POPTR_010G213000v3	PtCHI3	I	OG1	ARE	491	497	cis-acting regulatory element essential for the anaerobic induction
Populus trichocarpa	PNT17879	POPTR_010G213000v3	PtCHI3	I	OG1	ARE	509	515	cis-acting regulatory element essential for the anaerobic induction
Populus trichocarpa	PNT17879	POPTR_010G213000v3	PtCHI3	I	OG1	ARE	581	587	cis-acting regulatory element essential for the anaerobic induction
Populus trichocarpa	PNT17879	POPTR_010G213000v3	PtCHI3	I	OG1	ARE	616	622	cis-acting regulatory element essential for the anaerobic induction
Populus trichocarpa	PNT17879	POPTR_010G213000v3	PtCHI3	I	OG1	ARE	630	636	cis-acting regulatory element essential for the anaerobic induction
Populus trichocarpa	PNT17879	POPTR_010G213000v3	PtCHI3	I	OG1	ARE	650	656	cis-acting regulatory element essential for the anaerobic induction
Populus trichocarpa	PNT17879	POPTR_010G213000v3	PtCHI3	I	OG1	ARE	737	743	cis-acting regulatory element essential for the anaerobic induction
Populus trichocarpa	PNT17879	POPTR_010G213000v3	PtCHI3	I	OG1	ARE	742	748	cis-acting regulatory element essential for the anaerobic induction
Populus trichocarpa	PNT17879	POPTR_010G213000v3	PtCHI3	I	OG1	ARE	817	823	cis-acting regulatory element essential for the anaerobic induction
Populus trichocarpa	PNT17879	POPTR_010G213000v3	PtCHI3	I	OG1	chs-CMA2c	1806	1818	part of a light responsive element
Populus trichocarpa	PNT17879	POPTR_010G213000v3	PtCHI3	I	OG1	G-box	1810	1816	cis-acting regulatory element involved in light responsiveness
Populus trichocarpa	PNT17879	POPTR_010G213000v3	PtCHI3	I	OG1	TCA-element	1560	1569	cis-acting element involved in salicylic acid responsiveness
Populus trichocarpa	PNT17879	POPTR_010G213000v3	PtCHI3	I	OG1	CGTCA-motif	1983	1988	cis-acting regulatory element involved in the MeJA-responsiveness
Populus trichocarpa	PNT17879	POPTR_010G213000v3	PtCHI3	I	OG1	TC-rich repeats	503	512	cis-acting element involved in defense and stress responsiveness
Populus trichocarpa	PNT17879	POPTR_010G213000v3	PtCHI3	I	OG1	CAT-box	1592	1598	cis-acting regulatory element related to meristem expression
Populus trichocarpa	PNT17879	POPTR_010G213000v3	PtCHI3	I	OG1	Box 4	1397	1403	part of a conserved DNA module involved in light responsiveness
Populus trichocarpa	PNT17879	POPTR_010G213000v3	PtCHI3	I	OG1	Box 4	1427	1433	part of a conserved DNA module involved in light responsiveness
Populus trichocarpa	PNT17879	POPTR_010G213000v3	PtCHI3	I	OG1	Box 4	1687	1693	part of a conserved DNA module involved in light responsiveness
Populus trichocarpa	PNT17879	POPTR_010G213000v3	PtCHI3	I	OG1	TGACG-motif	1983	1988	cis-acting regulatory element involved in the MeJA-responsiveness
Populus trichocarpa	PNT17879	POPTR_010G213000v3	PtCHI3	I	OG1	LTR	600	606	cis-acting element involved in low-temperature responsiveness
Populus trichocarpa	PNT17879	POPTR_010G213000v3	PtCHI3	I	OG1	LTR	769	775	cis-acting element involved in low-temperature responsiveness
Populus trichocarpa	PNT17879	POPTR_010G213000v3	PtCHI3	I	OG1	LTR	830	836	cis-acting element involved in low-temperature responsiveness
Populus trichocarpa	PNT17879	POPTR_010G213000v3	PtCHI3	I	OG1	LTR	1053	1059	cis-acting element involved in low-temperature responsiveness
Populus trichocarpa	PNT17879	POPTR_010G213000v3	PtCHI3	I	OG1	MBS	1880	1886	MYB binding site involved in drought-inducibility
Populus trichocarpa	PNT17879	POPTR_010G213000v3	PtCHI3	I	OG1	MBS	1979	1985	MYB binding site involved in drought-inducibility
Populus trichocarpa	PNT17879	POPTR_010G213000v3	PtCHI3	I	OG1	TCCC-motif	464	471	part of a light responsive element
Populus trichocarpa	PNT17879	POPTR_010G213000v3	PtCHI3	I	OG1	TCCC-motif	965	972	part of a light responsive element
Populus trichocarpa	PNT17879	POPTR_010G213000v3	PtCHI3	I	OG1	G-box	1810	1816	cis-acting regulatory element involved in light responsiveness
Populus trichocarpa	PNT32991	POPTR_006G219600v3	PtCHI2	III	OG2	G-box	809	815	cis-acting regulatory element involved in light responsiveness
Populus trichocarpa	PNT32991	POPTR_006G219600v3	PtCHI2	III	OG2	AE-box	817	825	part of a module for light response
Populus trichocarpa	PNT32991	POPTR_006G219600v3	PtCHI2	III	OG2	GT1-motif	119	125	light responsive element
Populus trichocarpa	PNT32991	POPTR_006G219600v3	PtCHI2	III	OG2	GT1-motif	462	468	light responsive element
Populus trichocarpa	PNT32991	POPTR_006G219600v3	PtCHI2	III	OG2	LTR	1942	1948	cis-acting element involved in low-temperature responsiveness
Populus trichocarpa	PNT32991	POPTR_006G219600v3	PtCHI2	III	OG2	AT1-motif	989	1002	part of a light responsive module
Populus trichocarpa	PNT32991	POPTR_006G219600v3	PtCHI2	III	OG2	TGACG-motif	211	216	cis-acting regulatory element involved in the MeJA-responsiveness
Populus trichocarpa	PNT32991	POPTR_006G219600v3	PtCHI2	III	OG2	TGACG-motif	622	627	cis-acting regulatory element involved in the MeJA-responsiveness
Populus trichocarpa	PNT32991	POPTR_006G219600v3	PtCHI2	III	OG2	circadian	1035	1044	cis-acting regulatory element involved in circadian control
Populus trichocarpa	PNT32991	POPTR_006G219600v3	PtCHI2	III	OG2	MBSI	112	122.5	MYB binding site involved in flavonoid biosynthetic genes regulation
Populus trichocarpa	PNT32991	POPTR_006G219600v3	PtCHI2	III	OG2	MBSI	1102	1112.5	MYB binding site involved in flavonoid biosynthetic genes regulation
Populus trichocarpa	PNT32991	POPTR_006G219600v3	PtCHI2	III	OG2	Box 4	570	576	part of a conserved DNA module involved in light responsiveness
Populus trichocarpa	PNT32991	POPTR_006G219600v3	PtCHI2	III	OG2	Box 4	908	914	part of a conserved DNA module involved in light responsiveness
Populus trichocarpa	PNT32991	POPTR_006G219600v3	PtCHI2	III	OG2	Box 4	1171	1177	part of a conserved DNA module involved in light responsiveness
Populus trichocarpa	PNT32991	POPTR_006G219600v3	PtCHI2	III	OG2	Box 4	1312	1318	part of a conserved DNA module involved in light responsiveness
Populus trichocarpa	PNT32991	POPTR_006G219600v3	PtCHI2	III	OG2	Box 4	1983	1989	part of a conserved DNA module involved in light responsiveness
Populus trichocarpa	PNT32991	POPTR_006G219600v3	PtCHI2	III	OG2	CGTCA-motif	211	216	cis-acting regulatory element involved in the MeJA-responsiveness
Populus trichocarpa	PNT32991	POPTR_006G219600v3	PtCHI2	III	OG2	CGTCA-motif	622	627	cis-acting regulatory element involved in the MeJA-responsiveness
Populus trichocarpa	PNT32991	POPTR_006G219600v3	PtCHI2	III	OG2	TCA-element	111	120	cis-acting element involved in salicylic acid responsiveness
Populus trichocarpa	PNT32991	POPTR_006G219600v3	PtCHI2	III	OG2	ARE	635	641	cis-acting regulatory element essential for the anaerobic induction
Populus trichocarpa	PNT32991	POPTR_006G219600v3	PtCHI2	III	OG2	ARE	1263	1269	cis-acting regulatory element essential for the anaerobic induction
Populus trichocarpa	PNT32991	POPTR_006G219600v3	PtCHI2	III	OG2	ARE	1565	1571	cis-acting regulatory element essential for the anaerobic induction
Populus trichocarpa	PNT32991	POPTR_006G219600v3	PtCHI2	III	OG2	ABRE	809	814	cis-acting element involved in the abscisic acid responsiveness
Populus trichocarpa	PNT47925	POPTR_002G052200v3	PtCHI1	III	OG5	RY-element	1197	1205	cis-acting regulatory element involved in seed-specific regulation
Populus trichocarpa	PNT47925	POPTR_002G052200v3	PtCHI1	III	OG5	RY-element	1201	1209	cis-acting regulatory element involved in seed-specific regulation
Populus trichocarpa	PNT47925	POPTR_002G052200v3	PtCHI1	III	OG5	G-box	1950	1956	cis-acting regulatory element involved in light responsiveness
Populus trichocarpa	PNT47925	POPTR_002G052200v3	PtCHI1	III	OG5	MRE	418	425	MYB binding site involved in light responsiveness
Populus trichocarpa	PNT47925	POPTR_002G052200v3	PtCHI1	III	OG5	ARE	1566	1572	cis-acting regulatory element essential for the anaerobic induction
Populus trichocarpa	PNT47925	POPTR_002G052200v3	PtCHI1	III	OG5	ARE	1923	1929	cis-acting regulatory element essential for the anaerobic induction
Populus trichocarpa	PNT47925	POPTR_002G052200v3	PtCHI1	III	OG5	Sp1	482	488	light responsive element
Populus trichocarpa	PNT47925	POPTR_002G052200v3	PtCHI1	III	OG5	ABRE	1940	1945	cis-acting element involved in the abscisic acid responsiveness
Populus trichocarpa	PNT47925	POPTR_002G052200v3	PtCHI1	III	OG5	ABRE	1950	1956	cis-acting element involved in the abscisic acid responsiveness
Populus trichocarpa	PNT47925	POPTR_002G052200v3	PtCHI1	III	OG5	ABRE	1951	1956	cis-acting element involved in the abscisic acid responsiveness
Populus trichocarpa	PNT47925	POPTR_002G052200v3	PtCHI1	III	OG5	G-box	1939	1945	cis-acting regulatory element involved in light responsiveness
Populus trichocarpa	PNT47925	POPTR_002G052200v3	PtCHI1	III	OG5	G-box	1950	1956	cis-acting regulatory element involved in light responsiveness
Populus trichocarpa	PNT47925	POPTR_002G052200v3	PtCHI1	III	OG5	GT1-motif	1688	1694	light responsive element
Populus trichocarpa	PNT47925	POPTR_002G052200v3	PtCHI1	III	OG5	Box 4	341	347	part of a conserved DNA module involved in light responsiveness
Populus trichocarpa	PNT47925	POPTR_002G052200v3	PtCHI1	III	OG5	Box 4	385	391	part of a conserved DNA module involved in light responsiveness
Populus trichocarpa	PNT47925	POPTR_002G052200v3	PtCHI1	III	OG5	3-AF1 binding site	1154	1164	light responsive element
Populus trichocarpa	PNT47925	POPTR_002G052200v3	PtCHI1	III	OG5	CAT-box	1955	1961	cis-acting regulatory element related to meristem expression
Populus trichocarpa	PNT47925	POPTR_002G052200v3	PtCHI1	III	OG5	GATA-motif	272	282	part of a light responsive element
Populus trichocarpa	PNT47925	POPTR_002G052200v3	PtCHI1	III	OG5	L-box	529	539	part of a light responsive element
Populus trichocarpa	PNT47925	POPTR_002G052200v3	PtCHI1	III	OG5	TCT-motif	214	220	part of a light responsive element
Populus trichocarpa	PNT47925	POPTR_002G052200v3	PtCHI1	III	OG5	TCT-motif	1042	1048	part of a light responsive element
Chlamydomonas reinhardtii	PNW75204	CHLRE_12g517100v5	CrCHI3	III	OG4	G-box	64	70	cis-acting regulatory element involved in light responsiveness
Chlamydomonas reinhardtii	PNW75204	CHLRE_12g517100v5	CrCHI3	III	OG4	G-box	262	273	cis-acting regulatory element involved in light responsiveness
Chlamydomonas reinhardtii	PNW75204	CHLRE_12g517100v5	CrCHI3	III	OG4	G-box	265	271	cis-acting regulatory element involved in light responsiveness
Chlamydomonas reinhardtii	PNW75204	CHLRE_12g517100v5	CrCHI3	III	OG4	G-box	348	354	cis-acting regulatory element involved in light responsiveness
Chlamydomonas reinhardtii	PNW75204	CHLRE_12g517100v5	CrCHI3	III	OG4	G-box	1235	1241	cis-acting regulatory element involved in light responsiveness
Chlamydomonas reinhardtii	PNW75204	CHLRE_12g517100v5	CrCHI3	III	OG4	G-box	1306	1312	cis-acting regulatory element involved in light responsiveness
Chlamydomonas reinhardtii	PNW75204	CHLRE_12g517100v5	CrCHI3	III	OG4	G-box	1462	1468	cis-acting regulatory element involved in light responsiveness
Chlamydomonas reinhardtii	PNW75204	CHLRE_12g517100v5	CrCHI3	III	OG4	G-box	1715	1721	cis-acting regulatory element involved in light responsiveness
Chlamydomonas reinhardtii	PNW75204	CHLRE_12g517100v5	CrCHI3	III	OG4	G-box	1869	1875	cis-acting regulatory element involved in light responsiveness
Chlamydomonas reinhardtii	PNW75204	CHLRE_12g517100v5	CrCHI3	III	OG4	ABRE	65	70	cis-acting element involved in the abscisic acid responsiveness
Chlamydomonas reinhardtii	PNW75204	CHLRE_12g517100v5	CrCHI3	III	OG4	ABRE	263	272	cis-acting element involved in the abscisic acid responsiveness
Chlamydomonas reinhardtii	PNW75204	CHLRE_12g517100v5	CrCHI3	III	OG4	ABRE	265	271	cis-acting element involved in the abscisic acid responsiveness
Chlamydomonas reinhardtii	PNW75204	CHLRE_12g517100v5	CrCHI3	III	OG4	ABRE	266	271	cis-acting element involved in the abscisic acid responsiveness
Chlamydomonas reinhardtii	PNW75204	CHLRE_12g517100v5	CrCHI3	III	OG4	ABRE	1235	1240	cis-acting element involved in the abscisic acid responsiveness
Chlamydomonas reinhardtii	PNW75204	CHLRE_12g517100v5	CrCHI3	III	OG4	ABRE	1462	1468	cis-acting element involved in the abscisic acid responsiveness
Chlamydomonas reinhardtii	PNW75204	CHLRE_12g517100v5	CrCHI3	III	OG4	ABRE	1463	1468	cis-acting element involved in the abscisic acid responsiveness
Chlamydomonas reinhardtii	PNW75204	CHLRE_12g517100v5	CrCHI3	III	OG4	ABRE	1616	1621	cis-acting element involved in the abscisic acid responsiveness
Chlamydomonas reinhardtii	PNW75204	CHLRE_12g517100v5	CrCHI3	III	OG4	ABRE	1867	1876	cis-acting element involved in the abscisic acid responsiveness
Chlamydomonas reinhardtii	PNW75204	CHLRE_12g517100v5	CrCHI3	III	OG4	ABRE	1869	1874	cis-acting element involved in the abscisic acid responsiveness
Chlamydomonas reinhardtii	PNW75204	CHLRE_12g517100v5	CrCHI3	III	OG4	GT1-motif	1550	1556	light responsive element
Chlamydomonas reinhardtii	PNW75204	CHLRE_12g517100v5	CrCHI3	III	OG4	O2-site	345	354	cis-acting regulatory element involved in zein metabolism regulation
Chlamydomonas reinhardtii	PNW75204	CHLRE_12g517100v5	CrCHI3	III	OG4	G-box	265	271	cis-acting regulatory element involved in light responsiveness
Chlamydomonas reinhardtii	PNW75204	CHLRE_12g517100v5	CrCHI3	III	OG4	G-box	1462	1468	cis-acting regulatory element involved in light responsiveness
Chlamydomonas reinhardtii	PNW75204	CHLRE_12g517100v5	CrCHI3	III	OG4	G-box	1616	1622	cis-acting regulatory element involved in light responsiveness
Chlamydomonas reinhardtii	PNW75204	CHLRE_12g517100v5	CrCHI3	III	OG4	L-box	601	610	part of a light responsive element
Chlamydomonas reinhardtii	PNW75204	CHLRE_12g517100v5	CrCHI3	III	OG4	L-box	1250	1259	part of a light responsive element
Chlamydomonas reinhardtii	PNW75204	CHLRE_12g517100v5	CrCHI3	III	OG4	CAT-box	1129	1135	cis-acting regulatory element related to meristem expression
Chlamydomonas reinhardtii	PNW75204	CHLRE_12g517100v5	CrCHI3	III	OG4	P-box	1440	1447	gibberellin-responsive element
Chlamydomonas reinhardtii	PNW75204	CHLRE_12g517100v5	CrCHI3	III	OG4	TGACG-motif	129	134	cis-acting regulatory element involved in the MeJA-responsiveness
Chlamydomonas reinhardtii	PNW75204	CHLRE_12g517100v5	CrCHI3	III	OG4	TGACG-motif	961	966	cis-acting regulatory element involved in the MeJA-responsiveness
Chlamydomonas reinhardtii	PNW75204	CHLRE_12g517100v5	CrCHI3	III	OG4	TGACG-motif	1621	1626	cis-acting regulatory element involved in the MeJA-responsiveness
Chlamydomonas reinhardtii	PNW75204	CHLRE_12g517100v5	CrCHI3	III	OG4	TGACG-motif	1927	1932	cis-acting regulatory element involved in the MeJA-responsiveness
Chlamydomonas reinhardtii	PNW75204	CHLRE_12g517100v5	CrCHI3	III	OG4	CGTCA-motif	129	134	cis-acting regulatory element involved in the MeJA-responsiveness
Chlamydomonas reinhardtii	PNW75204	CHLRE_12g517100v5	CrCHI3	III	OG4	CGTCA-motif	961	966	cis-acting regulatory element involved in the MeJA-responsiveness
Chlamydomonas reinhardtii	PNW75204	CHLRE_12g517100v5	CrCHI3	III	OG4	CGTCA-motif	1621	1626	cis-acting regulatory element involved in the MeJA-responsiveness
Chlamydomonas reinhardtii	PNW75204	CHLRE_12g517100v5	CrCHI3	III	OG4	CGTCA-motif	1927	1932	cis-acting regulatory element involved in the MeJA-responsiveness
Chlamydomonas reinhardtii	PNW75204	CHLRE_12g517100v5	CrCHI3	III	OG4	AuxRR-core	895	902	cis-acting regulatory element involved in auxin responsiveness
Chlamydomonas reinhardtii	PNW75204	CHLRE_12g517100v5	CrCHI3	III	OG4	AuxRR-core	1467	1474	cis-acting regulatory element involved in auxin responsiveness
Chlamydomonas reinhardtii	PNW75204	CHLRE_12g517100v5	CrCHI3	III	OG4	Sp1	79	85	light responsive element
Chlamydomonas reinhardtii	PNW75204	CHLRE_12g517100v5	CrCHI3	III	OG4	Sp1	83	89	light responsive element
Chlamydomonas reinhardtii	PNW75204	CHLRE_12g517100v5	CrCHI3	III	OG4	Sp1	284	290	light responsive element
Chlamydomonas reinhardtii	PNW75204	CHLRE_12g517100v5	CrCHI3	III	OG4	Sp1	793	799	light responsive element
Chlamydomonas reinhardtii	PNW75204	CHLRE_12g517100v5	CrCHI3	III	OG4	Sp1	1050	1056	light responsive element
Chlamydomonas reinhardtii	PNW75204	CHLRE_12g517100v5	CrCHI3	III	OG4	Sp1	1200	1206	light responsive element
Chlamydomonas reinhardtii	PNW75204	CHLRE_12g517100v5	CrCHI3	III	OG4	Sp1	1376	1382	light responsive element
Chlamydomonas reinhardtii	PNW75204	CHLRE_12g517100v5	CrCHI3	III	OG4	Sp1	1515	1521	light responsive element
Chlamydomonas reinhardtii	PNW75204	CHLRE_12g517100v5	CrCHI3	III	OG4	GC-motif	1046	1052	enhancer-like element involved in anoxic specific inducibility
Chlamydomonas reinhardtii	PNW75204	CHLRE_12g517100v5	CrCHI3	III	OG4	TGA-element	763	769	auxin-responsive element
Chlamydomonas reinhardtii	PNW75204	CHLRE_12g517100v5	CrCHI3	III	OG4	TCT-motif	1855	1861	part of a light responsive element
Chlamydomonas reinhardtii	PNW75204	CHLRE_12g517100v5	CrCHI3	III	OG4	Pc-CMA2c	738	747	part of a light responsive element
Chlamydomonas reinhardtii	PNW75204	CHLRE_12g517100v5	CrCHI3	III	OG4	GTGGC-motif	287	297	part of a light responsive element
Chlamydomonas reinhardtii	PNW77676	CHLRE_10g446800v5	CrCHI2	Outgroup	OG2	CAT-box	179	185	cis-acting regulatory element related to meristem expression
Chlamydomonas reinhardtii	PNW77676	CHLRE_10g446800v5	CrCHI2	Outgroup	OG2	TGACG-motif	382	387	cis-acting regulatory element involved in the MeJA-responsiveness
Chlamydomonas reinhardtii	PNW77676	CHLRE_10g446800v5	CrCHI2	Outgroup	OG2	TGACG-motif	1248	1253	cis-acting regulatory element involved in the MeJA-responsiveness
Chlamydomonas reinhardtii	PNW77676	CHLRE_10g446800v5	CrCHI2	Outgroup	OG2	TGACG-motif	1419	1424	cis-acting regulatory element involved in the MeJA-responsiveness
Chlamydomonas reinhardtii	PNW77676	CHLRE_10g446800v5	CrCHI2	Outgroup	OG2	O2-site	1628	1637	cis-acting regulatory element involved in zein metabolism regulation
Chlamydomonas reinhardtii	PNW77676	CHLRE_10g446800v5	CrCHI2	Outgroup	OG2	O2-site	1951	1960	cis-acting regulatory element involved in zein metabolism regulation
Chlamydomonas reinhardtii	PNW77676	CHLRE_10g446800v5	CrCHI2	Outgroup	OG2	GCN4_motif	283	290	cis-regulatory element involved in endosperm expression
Chlamydomonas reinhardtii	PNW77676	CHLRE_10g446800v5	CrCHI2	Outgroup	OG2	TGA-element	1782	1788	auxin-responsive element
Chlamydomonas reinhardtii	PNW77676	CHLRE_10g446800v5	CrCHI2	Outgroup	OG2	TGA-element	1794	1800	auxin-responsive element
Chlamydomonas reinhardtii	PNW77676	CHLRE_10g446800v5	CrCHI2	Outgroup	OG2	GC-motif	1915	1921	enhancer-like element involved in anoxic specific inducibility
Chlamydomonas reinhardtii	PNW77676	CHLRE_10g446800v5	CrCHI2	Outgroup	OG2	MBS	732	738	MYB binding site involved in drought-inducibility
Chlamydomonas reinhardtii	PNW77676	CHLRE_10g446800v5	CrCHI2	Outgroup	OG2	G-box	673	679	cis-acting regulatory element involved in light responsiveness
Chlamydomonas reinhardtii	PNW77676	CHLRE_10g446800v5	CrCHI2	Outgroup	OG2	G-box	1515	1521	cis-acting regulatory element involved in light responsiveness
Chlamydomonas reinhardtii	PNW77676	CHLRE_10g446800v5	CrCHI2	Outgroup	OG2	Sp1	21	27	light responsive element
Chlamydomonas reinhardtii	PNW77676	CHLRE_10g446800v5	CrCHI2	Outgroup	OG2	Sp1	214	220	light responsive element
Chlamydomonas reinhardtii	PNW77676	CHLRE_10g446800v5	CrCHI2	Outgroup	OG2	Sp1	1686	1692	light responsive element
Chlamydomonas reinhardtii	PNW77676	CHLRE_10g446800v5	CrCHI2	Outgroup	OG2	ABRE	61	66	cis-acting element involved in the abscisic acid responsiveness
Chlamydomonas reinhardtii	PNW77676	CHLRE_10g446800v5	CrCHI2	Outgroup	OG2	ABRE	143	148	cis-acting element involved in the abscisic acid responsiveness
Chlamydomonas reinhardtii	PNW77676	CHLRE_10g446800v5	CrCHI2	Outgroup	OG2	ABRE	435	444	cis-acting element involved in the abscisic acid responsiveness
Chlamydomonas reinhardtii	PNW77676	CHLRE_10g446800v5	CrCHI2	Outgroup	OG2	ABRE	673	679	cis-acting element involved in the abscisic acid responsiveness
Chlamydomonas reinhardtii	PNW77676	CHLRE_10g446800v5	CrCHI2	Outgroup	OG2	ABRE	674	679	cis-acting element involved in the abscisic acid responsiveness
Chlamydomonas reinhardtii	PNW77676	CHLRE_10g446800v5	CrCHI2	Outgroup	OG2	ABRE	687	692	cis-acting element involved in the abscisic acid responsiveness
Chlamydomonas reinhardtii	PNW77676	CHLRE_10g446800v5	CrCHI2	Outgroup	OG2	ABRE	1101	1106	cis-acting element involved in the abscisic acid responsiveness
Chlamydomonas reinhardtii	PNW77676	CHLRE_10g446800v5	CrCHI2	Outgroup	OG2	ABRE	1515	1521	cis-acting element involved in the abscisic acid responsiveness
Chlamydomonas reinhardtii	PNW77676	CHLRE_10g446800v5	CrCHI2	Outgroup	OG2	ABRE	1516	1521	cis-acting element involved in the abscisic acid responsiveness
Chlamydomonas reinhardtii	PNW77676	CHLRE_10g446800v5	CrCHI2	Outgroup	OG2	ABRE	1791	1796	cis-acting element involved in the abscisic acid responsiveness
Chlamydomonas reinhardtii	PNW77676	CHLRE_10g446800v5	CrCHI2	Outgroup	OG2	MRE	1760	1767	MYB binding site involved in light responsiveness
Chlamydomonas reinhardtii	PNW77676	CHLRE_10g446800v5	CrCHI2	Outgroup	OG2	G-box	60	66	cis-acting regulatory element involved in light responsiveness
Chlamydomonas reinhardtii	PNW77676	CHLRE_10g446800v5	CrCHI2	Outgroup	OG2	G-box	141	150	cis-acting regulatory element involved in light responsiveness
Chlamydomonas reinhardtii	PNW77676	CHLRE_10g446800v5	CrCHI2	Outgroup	OG2	G-box	143	149	cis-acting regulatory element involved in light responsiveness
Chlamydomonas reinhardtii	PNW77676	CHLRE_10g446800v5	CrCHI2	Outgroup	OG2	G-box	618	624	cis-acting regulatory element involved in light responsiveness
Chlamydomonas reinhardtii	PNW77676	CHLRE_10g446800v5	CrCHI2	Outgroup	OG2	G-box	673	679	cis-acting regulatory element involved in light responsiveness
Chlamydomonas reinhardtii	PNW77676	CHLRE_10g446800v5	CrCHI2	Outgroup	OG2	G-box	687	693	cis-acting regulatory element involved in light responsiveness
Chlamydomonas reinhardtii	PNW77676	CHLRE_10g446800v5	CrCHI2	Outgroup	OG2	G-box	889	895	cis-acting regulatory element involved in light responsiveness
Chlamydomonas reinhardtii	PNW77676	CHLRE_10g446800v5	CrCHI2	Outgroup	OG2	G-box	1100	1106	cis-acting regulatory element involved in light responsiveness
Chlamydomonas reinhardtii	PNW77676	CHLRE_10g446800v5	CrCHI2	Outgroup	OG2	G-box	1515	1521	cis-acting regulatory element involved in light responsiveness
Chlamydomonas reinhardtii	PNW77676	CHLRE_10g446800v5	CrCHI2	Outgroup	OG2	G-box	1791	1797	cis-acting regulatory element involved in light responsiveness
Chlamydomonas reinhardtii	PNW77676	CHLRE_10g446800v5	CrCHI2	Outgroup	OG2	CGTCA-motif	382	387	cis-acting regulatory element involved in the MeJA-responsiveness
Chlamydomonas reinhardtii	PNW77676	CHLRE_10g446800v5	CrCHI2	Outgroup	OG2	CGTCA-motif	1248	1253	cis-acting regulatory element involved in the MeJA-responsiveness
Chlamydomonas reinhardtii	PNW77676	CHLRE_10g446800v5	CrCHI2	Outgroup	OG2	CGTCA-motif	1419	1424	cis-acting regulatory element involved in the MeJA-responsiveness
Chlamydomonas reinhardtii	PNW77676	CHLRE_10g446800v5	CrCHI2	Outgroup	OG2	TCA-element	1956	1965	cis-acting element involved in salicylic acid responsiveness
Chlamydomonas reinhardtii	PNW87933	CHLRE_01g007600v5	CrCHI1	III	OG2	ABRE	264	269	cis-acting element involved in the abscisic acid responsiveness
Chlamydomonas reinhardtii	PNW87933	CHLRE_01g007600v5	CrCHI1	III	OG2	ABRE	1615	1622	cis-acting element involved in the abscisic acid responsiveness
Chlamydomonas reinhardtii	PNW87933	CHLRE_01g007600v5	CrCHI1	III	OG2	Sp1	134	140	light responsive element
Chlamydomonas reinhardtii	PNW87933	CHLRE_01g007600v5	CrCHI1	III	OG2	Sp1	590	596	light responsive element
Chlamydomonas reinhardtii	PNW87933	CHLRE_01g007600v5	CrCHI1	III	OG2	Sp1	594	600	light responsive element
Chlamydomonas reinhardtii	PNW87933	CHLRE_01g007600v5	CrCHI1	III	OG2	Sp1	598	604	light responsive element
Chlamydomonas reinhardtii	PNW87933	CHLRE_01g007600v5	CrCHI1	III	OG2	Sp1	751	757	light responsive element
Chlamydomonas reinhardtii	PNW87933	CHLRE_01g007600v5	CrCHI1	III	OG2	Sp1	1412	1418	light responsive element
Chlamydomonas reinhardtii	PNW87933	CHLRE_01g007600v5	CrCHI1	III	OG2	Sp1	1669	1675	light responsive element
Chlamydomonas reinhardtii	PNW87933	CHLRE_01g007600v5	CrCHI1	III	OG2	Sp1	1728	1734	light responsive element
Chlamydomonas reinhardtii	PNW87933	CHLRE_01g007600v5	CrCHI1	III	OG2	Sp1	1769	1775	light responsive element
Chlamydomonas reinhardtii	PNW87933	CHLRE_01g007600v5	CrCHI1	III	OG2	Sp1	1773	1779	light responsive element
Chlamydomonas reinhardtii	PNW87933	CHLRE_01g007600v5	CrCHI1	III	OG2	G-box	263	269	cis-acting regulatory element involved in light responsiveness
Chlamydomonas reinhardtii	PNW87933	CHLRE_01g007600v5	CrCHI1	III	OG2	G-box	1940	1946	cis-acting regulatory element involved in light responsiveness
Chlamydomonas reinhardtii	PNW87933	CHLRE_01g007600v5	CrCHI1	III	OG2	CGTCA-motif	103	108	cis-acting regulatory element involved in the MeJA-responsiveness
Chlamydomonas reinhardtii	PNW87933	CHLRE_01g007600v5	CrCHI1	III	OG2	CGTCA-motif	262	267	cis-acting regulatory element involved in the MeJA-responsiveness
Chlamydomonas reinhardtii	PNW87933	CHLRE_01g007600v5	CrCHI1	III	OG2	CGTCA-motif	1241	1246	cis-acting regulatory element involved in the MeJA-responsiveness
Chlamydomonas reinhardtii	PNW87933	CHLRE_01g007600v5	CrCHI1	III	OG2	CGTCA-motif	1427	1432	cis-acting regulatory element involved in the MeJA-responsiveness
Chlamydomonas reinhardtii	PNW87933	CHLRE_01g007600v5	CrCHI1	III	OG2	CGTCA-motif	1875	1880	cis-acting regulatory element involved in the MeJA-responsiveness
Chlamydomonas reinhardtii	PNW87933	CHLRE_01g007600v5	CrCHI1	III	OG2	TGACG-motif	103	108	cis-acting regulatory element involved in the MeJA-responsiveness
Chlamydomonas reinhardtii	PNW87933	CHLRE_01g007600v5	CrCHI1	III	OG2	TGACG-motif	262	267	cis-acting regulatory element involved in the MeJA-responsiveness
Chlamydomonas reinhardtii	PNW87933	CHLRE_01g007600v5	CrCHI1	III	OG2	TGACG-motif	1241	1246	cis-acting regulatory element involved in the MeJA-responsiveness
Chlamydomonas reinhardtii	PNW87933	CHLRE_01g007600v5	CrCHI1	III	OG2	TGACG-motif	1427	1432	cis-acting regulatory element involved in the MeJA-responsiveness
Chlamydomonas reinhardtii	PNW87933	CHLRE_01g007600v5	CrCHI1	III	OG2	TGACG-motif	1875	1880	cis-acting regulatory element involved in the MeJA-responsiveness
Chlamydomonas reinhardtii	PNW87933	CHLRE_01g007600v5	CrCHI1	III	OG2	CAT-box	641	647	cis-acting regulatory element related to meristem expression
Chlamydomonas reinhardtii	PNW87933	CHLRE_01g007600v5	CrCHI1	III	OG2	CAT-box	647	653	cis-acting regulatory element related to meristem expression
Chlamydomonas reinhardtii	PNW87933	CHLRE_01g007600v5	CrCHI1	III	OG2	CAT-box	662	668	cis-acting regulatory element related to meristem expression
Chlamydomonas reinhardtii	PNW87933	CHLRE_01g007600v5	CrCHI1	III	OG2	CAT-box	783	789	cis-acting regulatory element related to meristem expression
Chlamydomonas reinhardtii	PNW87933	CHLRE_01g007600v5	CrCHI1	III	OG2	CAT-box	1013	1019	cis-acting regulatory element related to meristem expression
Chlamydomonas reinhardtii	PNW87933	CHLRE_01g007600v5	CrCHI1	III	OG2	AE-box	363	371	part of a module for light response
Chlamydomonas reinhardtii	PNW87933	CHLRE_01g007600v5	CrCHI1	III	OG2	GC-motif	114	120	enhancer-like element involved in anoxic specific inducibility
Chlamydomonas reinhardtii	PNW87933	CHLRE_01g007600v5	CrCHI1	III	OG2	GC-motif	523	529	enhancer-like element involved in anoxic specific inducibility
Chlamydomonas reinhardtii	PNW87933	CHLRE_01g007600v5	CrCHI1	III	OG2	GC-motif	601	607	enhancer-like element involved in anoxic specific inducibility
Chlamydomonas reinhardtii	PNW87933	CHLRE_01g007600v5	CrCHI1	III	OG2	GC-motif	754	760	enhancer-like element involved in anoxic specific inducibility
Chlamydomonas reinhardtii	PNW87933	CHLRE_01g007600v5	CrCHI1	III	OG2	GC-motif	943	949	enhancer-like element involved in anoxic specific inducibility
Chlamydomonas reinhardtii	PNW87933	CHLRE_01g007600v5	CrCHI1	III	OG2	GC-motif	952	958	enhancer-like element involved in anoxic specific inducibility
Chlamydomonas reinhardtii	PNW87933	CHLRE_01g007600v5	CrCHI1	III	OG2	GC-motif	1005	1011	enhancer-like element involved in anoxic specific inducibility
Chlamydomonas reinhardtii	PNW87933	CHLRE_01g007600v5	CrCHI1	III	OG2	GC-motif	1129	1135	enhancer-like element involved in anoxic specific inducibility
Chlamydomonas reinhardtii	PNW87933	CHLRE_01g007600v5	CrCHI1	III	OG2	GC-motif	1827	1833	enhancer-like element involved in anoxic specific inducibility
Chlamydomonas reinhardtii	PNW87933	CHLRE_01g007600v5	CrCHI1	III	OG2	MBS	1406	1412	MYB binding site involved in drought-inducibility
Physcomitrella patens	Pp3c10_20100V3.1	Pp3c10_20100	PpCHI3	III	OG4	HD-Zip 1	206	214.5	element involved in differentiation of the palisade mesophyll cells
Physcomitrella patens	Pp3c10_20100V3.1	Pp3c10_20100	PpCHI3	III	OG4	O2-site	1650	1659	cis-acting regulatory element involved in zein metabolism regulation
Physcomitrella patens	Pp3c10_20100V3.1	Pp3c10_20100	PpCHI3	III	OG4	O2-site	1896	1905	cis-acting regulatory element involved in zein metabolism regulation
Physcomitrella patens	Pp3c10_20100V3.1	Pp3c10_20100	PpCHI3	III	OG4	MBS	615	621	MYB binding site involved in drought-inducibility
Physcomitrella patens	Pp3c10_20100V3.1	Pp3c10_20100	PpCHI3	III	OG4	GT1-motif	1563	1569	light responsive element
Physcomitrella patens	Pp3c10_20100V3.1	Pp3c10_20100	PpCHI3	III	OG4	3-AF1 binding site	1533	1543	light responsive element
Physcomitrella patens	Pp3c10_20100V3.1	Pp3c10_20100	PpCHI3	III	OG4	Box 4	232	238	part of a conserved DNA module involved in light responsiveness
Physcomitrella patens	Pp3c10_20100V3.1	Pp3c10_20100	PpCHI3	III	OG4	Box 4	1342	1348	part of a conserved DNA module involved in light responsiveness
Physcomitrella patens	Pp3c10_20100V3.1	Pp3c10_20100	PpCHI3	III	OG4	Box 4	1446	1452	part of a conserved DNA module involved in light responsiveness
Physcomitrella patens	Pp3c10_20100V3.1	Pp3c10_20100	PpCHI3	III	OG4	TCT-motif	166	172	part of a light responsive element
Physcomitrella patens	Pp3c10_20100V3.1	Pp3c10_20100	PpCHI3	III	OG4	TCT-motif	731	737	part of a light responsive element
Physcomitrella patens	Pp3c10_20100V3.1	Pp3c10_20100	PpCHI3	III	OG4	TCT-motif	1110	1116	part of a light responsive element
Physcomitrella patens	Pp3c10_20100V3.1	Pp3c10_20100	PpCHI3	III	OG4	P-box	777	784	gibberellin-responsive element
Physcomitrella patens	Pp3c10_20100V3.1	Pp3c10_20100	PpCHI3	III	OG4	TCA-element	64	73	cis-acting element involved in salicylic acid responsiveness
Physcomitrella patens	Pp3c10_20100V3.1	Pp3c10_20100	PpCHI3	III	OG4	ARE	1963	1969	cis-acting regulatory element essential for the anaerobic induction
Physcomitrella patens	Pp3c10_20100V3.1	Pp3c10_20100	PpCHI3	III	OG4	MRE	59	66	MYB binding site involved in light responsiveness
Physcomitrella patens	Pp3c11_25580V3.1	Pp3c11_25580	PpCHI4	III	OG5	TCT-motif	18	24	part of a light responsive element
Physcomitrella patens	Pp3c11_25580V3.1	Pp3c11_25580	PpCHI4	III	OG5	GATA-motif	221	231	part of a light responsive element
Physcomitrella patens	Pp3c11_25580V3.1	Pp3c11_25580	PpCHI4	III	OG5	GATA-motif	1425	1432	part of a light responsive element
Physcomitrella patens	Pp3c11_25580V3.1	Pp3c11_25580	PpCHI4	III	OG5	Box 4	247	253	part of a conserved DNA module involved in light responsiveness
Physcomitrella patens	Pp3c11_25580V3.1	Pp3c11_25580	PpCHI4	III	OG5	Box 4	283	289	part of a conserved DNA module involved in light responsiveness
Physcomitrella patens	Pp3c11_25580V3.1	Pp3c11_25580	PpCHI4	III	OG5	Box 4	419	425	part of a conserved DNA module involved in light responsiveness
Physcomitrella patens	Pp3c11_25580V3.1	Pp3c11_25580	PpCHI4	III	OG5	Box 4	639	645	part of a conserved DNA module involved in light responsiveness
Physcomitrella patens	Pp3c11_25580V3.1	Pp3c11_25580	PpCHI4	III	OG5	Box 4	813	819	part of a conserved DNA module involved in light responsiveness
Physcomitrella patens	Pp3c11_25580V3.1	Pp3c11_25580	PpCHI4	III	OG5	O2-site	562	570	cis-acting regulatory element involved in zein metabolism regulation
Physcomitrella patens	Pp3c11_25580V3.1	Pp3c11_25580	PpCHI4	III	OG5	O2-site	1732	1741	cis-acting regulatory element involved in zein metabolism regulation
Physcomitrella patens	Pp3c11_25580V3.1	Pp3c11_25580	PpCHI4	III	OG5	LTR	1941	1947	cis-acting element involved in low-temperature responsiveness
Physcomitrella patens	Pp3c11_25580V3.1	Pp3c11_25580	PpCHI4	III	OG5	ATCT-motif	222	231	part of a conserved DNA module involved in light responsiveness
Physcomitrella patens	Pp3c11_25580V3.1	Pp3c11_25580	PpCHI4	III	OG5	NON-box	1862	1871	cis-acting regulatory element related to meristem specific activation
Physcomitrella patens	Pp3c11_25580V3.1	Pp3c11_25580	PpCHI4	III	OG5	Gap-box	41	50.5	part of a light responsive element
Physcomitrella patens	Pp3c11_25580V3.1	Pp3c11_25580	PpCHI4	III	OG5	Gap-box	549	558.5	part of a light responsive element
Physcomitrella patens	Pp3c11_25580V3.1	Pp3c11_25580	PpCHI4	III	OG5	AuxRR-core	430	437	cis-acting regulatory element involved in auxin responsiveness
Physcomitrella patens	Pp3c18_4460V3.1	Pp3c18_4460	PpCHI5	III	OG6	TGACG-motif	334	339	cis-acting regulatory element involved in the MeJA-responsiveness
Physcomitrella patens	Pp3c18_4460V3.1	Pp3c18_4460	PpCHI5	III	OG6	TGACG-motif	1082	1087	cis-acting regulatory element involved in the MeJA-responsiveness
Physcomitrella patens	Pp3c18_4460V3.1	Pp3c18_4460	PpCHI5	III	OG6	circadian	1165	1174	cis-acting regulatory element involved in circadian control
Physcomitrella patens	Pp3c18_4460V3.1	Pp3c18_4460	PpCHI5	III	OG6	Box 4	937	943	part of a conserved DNA module involved in light responsiveness
Physcomitrella patens	Pp3c18_4460V3.1	Pp3c18_4460	PpCHI5	III	OG6	Box 4	1297	1303	part of a conserved DNA module involved in light responsiveness
Physcomitrella patens	Pp3c18_4460V3.1	Pp3c18_4460	PpCHI5	III	OG6	Box 4	1451	1457	part of a conserved DNA module involved in light responsiveness
Physcomitrella patens	Pp3c18_4460V3.1	Pp3c18_4460	PpCHI5	III	OG6	ATC-motif	47	55	part of a conserved DNA module involved in light responsiveness
Physcomitrella patens	Pp3c18_4460V3.1	Pp3c18_4460	PpCHI5	III	OG6	TCT-motif	182	188	part of a light responsive element
Physcomitrella patens	Pp3c18_4460V3.1	Pp3c18_4460	PpCHI5	III	OG6	CAT-box	308	314	cis-acting regulatory element related to meristem expression
Physcomitrella patens	Pp3c18_4460V3.1	Pp3c18_4460	PpCHI5	III	OG6	CAT-box	424	430	cis-acting regulatory element related to meristem expression
Physcomitrella patens	Pp3c18_4460V3.1	Pp3c18_4460	PpCHI5	III	OG6	G-box	1945	1951	cis-acting regulatory element involved in light responsiveness
Physcomitrella patens	Pp3c18_4460V3.1	Pp3c18_4460	PpCHI5	III	OG6	GC-motif	361	367	enhancer-like element involved in anoxic specific inducibility
Physcomitrella patens	Pp3c18_4460V3.1	Pp3c18_4460	PpCHI5	III	OG6	GT1-motif	438	444	light responsive element
Physcomitrella patens	Pp3c18_4460V3.1	Pp3c18_4460	PpCHI5	III	OG6	MBS	38	44	MYB binding site involved in drought-inducibility
Physcomitrella patens	Pp3c18_4460V3.1	Pp3c18_4460	PpCHI5	III	OG6	MBS	1737	1743	MYB binding site involved in drought-inducibility
Physcomitrella patens	Pp3c18_4460V3.1	Pp3c18_4460	PpCHI5	III	OG6	LTR	964	970	cis-acting element involved in low-temperature responsiveness
Physcomitrella patens	Pp3c18_4460V3.1	Pp3c18_4460	PpCHI5	III	OG6	ARE	13	19	cis-acting regulatory element essential for the anaerobic induction
Physcomitrella patens	Pp3c18_4460V3.1	Pp3c18_4460	PpCHI5	III	OG6	ARE	286	292	cis-acting regulatory element essential for the anaerobic induction
Physcomitrella patens	Pp3c18_4460V3.1	Pp3c18_4460	PpCHI5	III	OG6	ARE	484	490	cis-acting regulatory element essential for the anaerobic induction
Physcomitrella patens	Pp3c18_4460V3.1	Pp3c18_4460	PpCHI5	III	OG6	ABRE	1117	1122	cis-acting element involved in the abscisic acid responsiveness
Physcomitrella patens	Pp3c18_4460V3.1	Pp3c18_4460	PpCHI5	III	OG6	ABRE	1928	1933	cis-acting element involved in the abscisic acid responsiveness
Physcomitrella patens	Pp3c18_4460V3.1	Pp3c18_4460	PpCHI5	III	OG6	ABRE	1945	1951	cis-acting element involved in the abscisic acid responsiveness
Physcomitrella patens	Pp3c18_4460V3.1	Pp3c18_4460	PpCHI5	III	OG6	ABRE	1946	1951	cis-acting element involved in the abscisic acid responsiveness
Physcomitrella patens	Pp3c18_4460V3.1	Pp3c18_4460	PpCHI5	III	OG6	ACE	342	351	cis-acting element involved in light responsiveness
Physcomitrella patens	Pp3c18_4460V3.1	Pp3c18_4460	PpCHI5	III	OG6	ACE	1658	1667	cis-acting element involved in light responsiveness
Physcomitrella patens	Pp3c18_4460V3.1	Pp3c18_4460	PpCHI5	III	OG6	Box II	1943	1952	part of a light responsive element
Physcomitrella patens	Pp3c18_4460V3.1	Pp3c18_4460	PpCHI5	III	OG6	G-box	1117	1123	cis-acting regulatory element involved in light responsiveness
Physcomitrella patens	Pp3c18_4460V3.1	Pp3c18_4460	PpCHI5	III	OG6	G-box	1928	1934	cis-acting regulatory element involved in light responsiveness
Physcomitrella patens	Pp3c18_4460V3.1	Pp3c18_4460	PpCHI5	III	OG6	G-box	1943	1952	cis-acting regulatory element involved in light responsiveness
Physcomitrella patens	Pp3c18_4460V3.1	Pp3c18_4460	PpCHI5	III	OG6	G-box	1945	1951	cis-acting regulatory element involved in light responsiveness
Physcomitrella patens	Pp3c18_4460V3.1	Pp3c18_4460	PpCHI5	III	OG6	CGTCA-motif	334	339	cis-acting regulatory element involved in the MeJA-responsiveness
Physcomitrella patens	Pp3c18_4460V3.1	Pp3c18_4460	PpCHI5	III	OG6	CGTCA-motif	1082	1087	cis-acting regulatory element involved in the MeJA-responsiveness
Physcomitrella patens	Pp3c18_4460V3.1	Pp3c18_4460	PpCHI5	III	OG6	TCA-element	655	664	cis-acting element involved in salicylic acid responsiveness
Physcomitrella patens	Pp3c18_4460V3.1	Pp3c18_4460	PpCHI5	III	OG6	Gap-box	1706	1715.5	part of a light responsive element
Physcomitrella patens	Pp3c1_6310V3.1	Pp3c1_6310	PpCHI1	IV	OG3	TCCC-motif	219	226	part of a light responsive element
Physcomitrella patens	Pp3c1_6310V3.1	Pp3c1_6310	PpCHI1	IV	OG3	TCCC-motif	816	823	part of a light responsive element
Physcomitrella patens	Pp3c1_6310V3.1	Pp3c1_6310	PpCHI1	IV	OG3	G-box	1400	1406	cis-acting regulatory element involved in light responsiveness
Physcomitrella patens	Pp3c1_6310V3.1	Pp3c1_6310	PpCHI1	IV	OG3	AE-box	1449	1457	part of a module for light response
Physcomitrella patens	Pp3c1_6310V3.1	Pp3c1_6310	PpCHI1	IV	OG3	AE-box	1740	1748	part of a module for light response
Physcomitrella patens	Pp3c1_6310V3.1	Pp3c1_6310	PpCHI1	IV	OG3	MBS	950	956	MYB binding site involved in drought-inducibility
Physcomitrella patens	Pp3c1_6310V3.1	Pp3c1_6310	PpCHI1	IV	OG3	TGACG-motif	907	912	cis-acting regulatory element involved in the MeJA-responsiveness
Physcomitrella patens	Pp3c1_6310V3.1	Pp3c1_6310	PpCHI1	IV	OG3	TGACG-motif	1118	1123	cis-acting regulatory element involved in the MeJA-responsiveness
Physcomitrella patens	Pp3c1_6310V3.1	Pp3c1_6310	PpCHI1	IV	OG3	TGACG-motif	1172	1177	cis-acting regulatory element involved in the MeJA-responsiveness
Physcomitrella patens	Pp3c1_6310V3.1	Pp3c1_6310	PpCHI1	IV	OG3	GATA-motif	774	783	part of a light responsive element
Physcomitrella patens	Pp3c1_6310V3.1	Pp3c1_6310	PpCHI1	IV	OG3	P-box	915	922	gibberellin-responsive element
Physcomitrella patens	Pp3c1_6310V3.1	Pp3c1_6310	PpCHI1	IV	OG3	TC-rich repeats	565	574	cis-acting element involved in defense and stress responsiveness
Physcomitrella patens	Pp3c1_6310V3.1	Pp3c1_6310	PpCHI1	IV	OG3	CGTCA-motif	907	912	cis-acting regulatory element involved in the MeJA-responsiveness
Physcomitrella patens	Pp3c1_6310V3.1	Pp3c1_6310	PpCHI1	IV	OG3	CGTCA-motif	1118	1123	cis-acting regulatory element involved in the MeJA-responsiveness
Physcomitrella patens	Pp3c1_6310V3.1	Pp3c1_6310	PpCHI1	IV	OG3	CGTCA-motif	1172	1177	cis-acting regulatory element involved in the MeJA-responsiveness
Physcomitrella patens	Pp3c1_6310V3.1	Pp3c1_6310	PpCHI1	IV	OG3	G-box	905	911	cis-acting regulatory element involved in light responsiveness
Physcomitrella patens	Pp3c1_6310V3.1	Pp3c1_6310	PpCHI1	IV	OG3	G-box	1031	1037	cis-acting regulatory element involved in light responsiveness
Physcomitrella patens	Pp3c1_6310V3.1	Pp3c1_6310	PpCHI1	IV	OG3	G-box	1363	1369	cis-acting regulatory element involved in light responsiveness
Physcomitrella patens	Pp3c1_6310V3.1	Pp3c1_6310	PpCHI1	IV	OG3	G-box	1918	1924	cis-acting regulatory element involved in light responsiveness
Physcomitrella patens	Pp3c1_6310V3.1	Pp3c1_6310	PpCHI1	IV	OG3	ARE	1182	1188	cis-acting regulatory element essential for the anaerobic induction
Physcomitrella patens	Pp3c1_6310V3.1	Pp3c1_6310	PpCHI1	IV	OG3	ABRE	905	910	cis-acting element involved in the abscisic acid responsiveness
Physcomitrella patens	Pp3c1_6310V3.1	Pp3c1_6310	PpCHI1	IV	OG3	ABRE	935	944	cis-acting element involved in the abscisic acid responsiveness
Physcomitrella patens	Pp3c1_6310V3.1	Pp3c1_6310	PpCHI1	IV	OG3	ABRE	1400	1405	cis-acting element involved in the abscisic acid responsiveness
Physcomitrella patens	Pp3c21_9340V3.1	Pp3c21_9340	PpCHI6	III	OG2	GATA-motif	222	232	part of a light responsive element
Physcomitrella patens	Pp3c21_9340V3.1	Pp3c21_9340	PpCHI6	III	OG2	TCT-motif	732	738	part of a light responsive element
Physcomitrella patens	Pp3c21_9340V3.1	Pp3c21_9340	PpCHI6	III	OG2	TCT-motif	1109	1115	part of a light responsive element
Physcomitrella patens	Pp3c21_9340V3.1	Pp3c21_9340	PpCHI6	III	OG2	Box 4	466	472	part of a conserved DNA module involved in light responsiveness
Physcomitrella patens	Pp3c21_9340V3.1	Pp3c21_9340	PpCHI6	III	OG2	Box 4	772	778	part of a conserved DNA module involved in light responsiveness
Physcomitrella patens	Pp3c21_9340V3.1	Pp3c21_9340	PpCHI6	III	OG2	Box 4	1689	1695	part of a conserved DNA module involved in light responsiveness
Physcomitrella patens	Pp3c21_9340V3.1	Pp3c21_9340	PpCHI6	III	OG2	MBS	1470	1476	MYB binding site involved in drought-inducibility
Physcomitrella patens	Pp3c21_9340V3.1	Pp3c21_9340	PpCHI6	III	OG2	MBS	1654	1660	MYB binding site involved in drought-inducibility
Physcomitrella patens	Pp3c21_9340V3.1	Pp3c21_9340	PpCHI6	III	OG2	MBS	1868	1874	MYB binding site involved in drought-inducibility
Physcomitrella patens	Pp3c21_9340V3.1	Pp3c21_9340	PpCHI6	III	OG2	MBS	1895	1901	MYB binding site involved in drought-inducibility
Physcomitrella patens	Pp3c21_9340V3.1	Pp3c21_9340	PpCHI6	III	OG2	GCN4_motif	486	493	cis-regulatory element involved in endosperm expression
Physcomitrella patens	Pp3c21_9340V3.1	Pp3c21_9340	PpCHI6	III	OG2	LAMP-element	532	540	part of a light responsive element
Physcomitrella patens	Pp3c21_9340V3.1	Pp3c21_9340	PpCHI6	III	OG2	LAMP-element	604	612	part of a light responsive element
Physcomitrella patens	Pp3c21_9340V3.1	Pp3c21_9340	PpCHI6	III	OG2	HD-Zip 1	1619	1627.5	element involved in differentiation of the palisade mesophyll cells
Physcomitrella patens	Pp3c21_9340V3.1	Pp3c21_9340	PpCHI6	III	OG2	GARE-motif	333	340	gibberellin-responsive element
Physcomitrella patens	Pp3c21_9340V3.1	Pp3c21_9340	PpCHI6	III	OG2	GARE-motif	872	879	gibberellin-responsive element
Physcomitrella patens	Pp3c21_9340V3.1	Pp3c21_9340	PpCHI6	III	OG2	G-box	1854	1860	cis-acting regulatory element involved in light responsiveness
Physcomitrella patens	Pp3c21_9340V3.1	Pp3c21_9340	PpCHI6	III	OG2	L-box	1875	1885	part of a light responsive element
Physcomitrella patens	Pp3c21_9340V3.1	Pp3c21_9340	PpCHI6	III	OG2	Sp1	1972	1978	light responsive element
Physcomitrella patens	Pp3c21_9340V3.1	Pp3c21_9340	PpCHI6	III	OG2	ABRE	682	687	cis-acting element involved in the abscisic acid responsiveness
Physcomitrella patens	Pp3c21_9340V3.1	Pp3c21_9340	PpCHI6	III	OG2	ABRE	1854	1860	cis-acting element involved in the abscisic acid responsiveness
Physcomitrella patens	Pp3c21_9340V3.1	Pp3c21_9340	PpCHI6	III	OG2	ABRE	1855	1860	cis-acting element involved in the abscisic acid responsiveness
Physcomitrella patens	Pp3c21_9340V3.1	Pp3c21_9340	PpCHI6	III	OG2	ARE	1186	1192	cis-acting regulatory element essential for the anaerobic induction
Physcomitrella patens	Pp3c21_9340V3.1	Pp3c21_9340	PpCHI6	III	OG2	ARE	1615	1621	cis-acting regulatory element essential for the anaerobic induction
Physcomitrella patens	Pp3c21_9340V3.1	Pp3c21_9340	PpCHI6	III	OG2	Box II	1852	1861	part of a light responsive element
Physcomitrella patens	Pp3c21_9340V3.1	Pp3c21_9340	PpCHI6	III	OG2	G-box	681	687	cis-acting regulatory element involved in light responsiveness
Physcomitrella patens	Pp3c21_9340V3.1	Pp3c21_9340	PpCHI6	III	OG2	G-box	1851	1863	cis-acting regulatory element involved in light responsiveness
Physcomitrella patens	Pp3c21_9340V3.1	Pp3c21_9340	PpCHI6	III	OG2	G-box	1852	1862	cis-acting regulatory element involved in light responsiveness
Physcomitrella patens	Pp3c21_9340V3.1	Pp3c21_9340	PpCHI6	III	OG2	G-box	1854	1860	cis-acting regulatory element involved in light responsiveness
Physcomitrella patens	Pp3c26_4040V3.1	Pp3c26_4040	PpCHI7	IV	OG3	ABRE	429	434	cis-acting element involved in the abscisic acid responsiveness
Physcomitrella patens	Pp3c26_4040V3.1	Pp3c26_4040	PpCHI7	IV	OG3	ABRE	1713	1719	cis-acting element involved in the abscisic acid responsiveness
Physcomitrella patens	Pp3c26_4040V3.1	Pp3c26_4040	PpCHI7	IV	OG3	ABRE	1714	1719	cis-acting element involved in the abscisic acid responsiveness
Physcomitrella patens	Pp3c26_4040V3.1	Pp3c26_4040	PpCHI7	IV	OG3	ARE	417	423	cis-acting regulatory element essential for the anaerobic induction
Physcomitrella patens	Pp3c26_4040V3.1	Pp3c26_4040	PpCHI7	IV	OG3	ARE	1940	1946	cis-acting regulatory element essential for the anaerobic induction
Physcomitrella patens	Pp3c26_4040V3.1	Pp3c26_4040	PpCHI7	IV	OG3	TCA-element	1090	1099	cis-acting element involved in salicylic acid responsiveness
Physcomitrella patens	Pp3c26_4040V3.1	Pp3c26_4040	PpCHI7	IV	OG3	CGTCA-motif	729	734	cis-acting regulatory element involved in the MeJA-responsiveness
Physcomitrella patens	Pp3c26_4040V3.1	Pp3c26_4040	PpCHI7	IV	OG3	G-box	428	434	cis-acting regulatory element involved in light responsiveness
Physcomitrella patens	Pp3c26_4040V3.1	Pp3c26_4040	PpCHI7	IV	OG3	G-box	1712	1720	cis-acting regulatory element involved in light responsiveness
Physcomitrella patens	Pp3c26_4040V3.1	Pp3c26_4040	PpCHI7	IV	OG3	G-box	1713	1719	cis-acting regulatory element involved in light responsiveness
Physcomitrella patens	Pp3c26_4040V3.1	Pp3c26_4040	PpCHI7	IV	OG3	AuxRR-core	1098	1105	cis-acting regulatory element involved in auxin responsiveness
Physcomitrella patens	Pp3c26_4040V3.1	Pp3c26_4040	PpCHI7	IV	OG3	GATA-motif	1338	1348	part of a light responsive element
Physcomitrella patens	Pp3c26_4040V3.1	Pp3c26_4040	PpCHI7	IV	OG3	GATA-motif	1500	1510	part of a light responsive element
Physcomitrella patens	Pp3c26_4040V3.1	Pp3c26_4040	PpCHI7	IV	OG3	TCT-motif	1340	1346	part of a light responsive element
Physcomitrella patens	Pp3c26_4040V3.1	Pp3c26_4040	PpCHI7	IV	OG3	P-box	1345	1352	gibberellin-responsive element
Physcomitrella patens	Pp3c26_4040V3.1	Pp3c26_4040	PpCHI7	IV	OG3	TGACG-motif	729	734	cis-acting regulatory element involved in the MeJA-responsiveness
Physcomitrella patens	Pp3c26_4040V3.1	Pp3c26_4040	PpCHI7	IV	OG3	chs-CMA2b	1782	1793	part of a light responsive element
Physcomitrella patens	Pp3c26_4040V3.1	Pp3c26_4040	PpCHI7	IV	OG3	GT1-motif	102	108	light responsive element
Physcomitrella patens	Pp3c26_4040V3.1	Pp3c26_4040	PpCHI7	IV	OG3	GT1-motif	1226	1233	light responsive element
Physcomitrella patens	Pp3c26_4040V3.1	Pp3c26_4040	PpCHI7	IV	OG3	GT1-motif	1227	1233	light responsive element
Physcomitrella patens	Pp3c26_4040V3.1	Pp3c26_4040	PpCHI7	IV	OG3	G-box	1713	1719	cis-acting regulatory element involved in light responsiveness
Physcomitrella patens	Pp3c26_4040V3.1	Pp3c26_4040	PpCHI7	IV	OG3	TCCC-motif	1674	1681	part of a light responsive element
Physcomitrella patens	Pp3c26_4040V3.1	Pp3c26_4040	PpCHI7	IV	OG3	AE-box	1545	1553	part of a module for light response
Physcomitrella patens	Pp3c4_25770V3.1	Pp3c4_25770	PpCHI2	IV	OG3	G-box	1905	1911	cis-acting regulatory element involved in light responsiveness
Physcomitrella patens	Pp3c4_25770V3.1	Pp3c4_25770	PpCHI2	IV	OG3	CGTCA-motif	1684	1689	cis-acting regulatory element involved in the MeJA-responsiveness
Physcomitrella patens	Pp3c4_25770V3.1	Pp3c4_25770	PpCHI2	IV	OG3	TCA-element	199	208	cis-acting element involved in salicylic acid responsiveness
Physcomitrella patens	Pp3c4_25770V3.1	Pp3c4_25770	PpCHI2	IV	OG3	ABRE	1462	1467	cis-acting element involved in the abscisic acid responsiveness
Physcomitrella patens	Pp3c4_25770V3.1	Pp3c4_25770	PpCHI2	IV	OG3	ARE	116	122	cis-acting regulatory element essential for the anaerobic induction
Physcomitrella patens	Pp3c4_25770V3.1	Pp3c4_25770	PpCHI2	IV	OG3	ARE	223	229	cis-acting regulatory element essential for the anaerobic induction
Physcomitrella patens	Pp3c4_25770V3.1	Pp3c4_25770	PpCHI2	IV	OG3	ARE	964	970	cis-acting regulatory element essential for the anaerobic induction
Physcomitrella patens	Pp3c4_25770V3.1	Pp3c4_25770	PpCHI2	IV	OG3	ARE	1289	1295	cis-acting regulatory element essential for the anaerobic induction
Physcomitrella patens	Pp3c4_25770V3.1	Pp3c4_25770	PpCHI2	IV	OG3	LAMP-element	722	730	part of a light responsive element
Physcomitrella patens	Pp3c4_25770V3.1	Pp3c4_25770	PpCHI2	IV	OG3	O2-site	141	150	cis-acting regulatory element involved in zein metabolism regulation
Physcomitrella patens	Pp3c4_25770V3.1	Pp3c4_25770	PpCHI2	IV	OG3	TGA-element	1757	1763	auxin-responsive element
Physcomitrella patens	Pp3c4_25770V3.1	Pp3c4_25770	PpCHI2	IV	OG3	GC-motif	866	872	enhancer-like element involved in anoxic specific inducibility
Physcomitrella patens	Pp3c4_25770V3.1	Pp3c4_25770	PpCHI2	IV	OG3	MBS	70	76	MYB binding site involved in drought-inducibility
Physcomitrella patens	Pp3c4_25770V3.1	Pp3c4_25770	PpCHI2	IV	OG3	MBS	893	899	MYB binding site involved in drought-inducibility
Physcomitrella patens	Pp3c4_25770V3.1	Pp3c4_25770	PpCHI2	IV	OG3	MBS	1489	1495	MYB binding site involved in drought-inducibility
Physcomitrella patens	Pp3c4_25770V3.1	Pp3c4_25770	PpCHI2	IV	OG3	MBS	1888	1894	MYB binding site involved in drought-inducibility
Physcomitrella patens	Pp3c4_25770V3.1	Pp3c4_25770	PpCHI2	IV	OG3	TCCC-motif	1508	1515	part of a light responsive element
Physcomitrella patens	Pp3c4_25770V3.1	Pp3c4_25770	PpCHI2	IV	OG3	G-box	1462	1468	cis-acting regulatory element involved in light responsiveness
Physcomitrella patens	Pp3c4_25770V3.1	Pp3c4_25770	PpCHI2	IV	OG3	CAT-box	172	178	cis-acting regulatory element related to meristem expression
Physcomitrella patens	Pp3c4_25770V3.1	Pp3c4_25770	PpCHI2	IV	OG3	CAT-box	407	413	cis-acting regulatory element related to meristem expression
Physcomitrella patens	Pp3c4_25770V3.1	Pp3c4_25770	PpCHI2	IV	OG3	TGACG-motif	1684	1689	cis-acting regulatory element involved in the MeJA-responsiveness
Solanum lycopersicum	Solyc02g067870.3.1	Solyc02g067870.3	SlCHI1	III	OG7	ARE	1456	1462	cis-acting regulatory element essential for the anaerobic induction
Solanum lycopersicum	Solyc02g067870.3.1	Solyc02g067870.3	SlCHI1	III	OG7	ABRE	1231	1236	cis-acting element involved in the abscisic acid responsiveness
Solanum lycopersicum	Solyc02g067870.3.1	Solyc02g067870.3	SlCHI1	III	OG7	RY-element	1830	1838	cis-acting regulatory element involved in seed-specific regulation
Solanum lycopersicum	Solyc02g067870.3.1	Solyc02g067870.3	SlCHI1	III	OG7	ACE	1073	1082	cis-acting element involved in light responsiveness
Solanum lycopersicum	Solyc02g067870.3.1	Solyc02g067870.3	SlCHI1	III	OG7	AuxRR-core	1858	1865	cis-acting regulatory element involved in auxin responsiveness
Solanum lycopersicum	Solyc02g067870.3.1	Solyc02g067870.3	SlCHI1	III	OG7	Box 4	429	435	part of a conserved DNA module involved in light responsiveness
Solanum lycopersicum	Solyc02g067870.3.1	Solyc02g067870.3	SlCHI1	III	OG7	Box 4	1547	1553	part of a conserved DNA module involved in light responsiveness
Solanum lycopersicum	Solyc02g067870.3.1	Solyc02g067870.3	SlCHI1	III	OG7	Box 4	1915	1921	part of a conserved DNA module involved in light responsiveness
Solanum lycopersicum	Solyc02g067870.3.1	Solyc02g067870.3	SlCHI1	III	OG7	GATA-motif	665	675	part of a light responsive element
Solanum lycopersicum	Solyc02g067870.3.1	Solyc02g067870.3	SlCHI1	III	OG7	P-box	973	980	gibberellin-responsive element
Solanum lycopersicum	Solyc02g067870.3.1	Solyc02g067870.3	SlCHI1	III	OG7	GARE-motif	1737	1744	gibberellin-responsive element
Solanum lycopersicum	Solyc02g067870.3.1	Solyc02g067870.3	SlCHI1	III	OG7	AE-box	37	45	part of a module for light response
Solanum lycopersicum	Solyc02g067870.3.1	Solyc02g067870.3	SlCHI1	III	OG7	G-box	1230	1236	cis-acting regulatory element involved in light responsiveness
Solanum lycopersicum	Solyc02g067870.3.1	Solyc02g067870.3	SlCHI1	III	OG7	MBS	241	247	MYB binding site involved in drought-inducibility
Solanum lycopersicum	Solyc02g067870.3.1	Solyc02g067870.3	SlCHI1	III	OG7	MBS	1717	1723	MYB binding site involved in drought-inducibility
Solanum lycopersicum	Solyc02g067870.3.1	Solyc02g067870.3	SlCHI1	III	OG7	GT1-motif	534	540	light responsive element
Solanum lycopersicum	Solyc02g067870.3.1	Solyc02g067870.3	SlCHI1	III	OG7	GT1-motif	1958	1965	light responsive element
Solanum lycopersicum	Solyc02g067870.3.1	Solyc02g067870.3	SlCHI1	III	OG7	GT1-motif	1959	1965	light responsive element
Solanum lycopersicum	Solyc02g067870.3.1	Solyc02g067870.3	SlCHI1	III	OG7	GA-motif	77	85	part of a light responsive element
Solanum lycopersicum	Solyc05g010310.3.1	Solyc05g010310.3	SlCHI2	I	OG1	TGACG-motif	311	316	cis-acting regulatory element involved in the MeJA-responsiveness
Solanum lycopersicum	Solyc05g010310.3.1	Solyc05g010310.3	SlCHI2	I	OG1	Box 4	936	942	part of a conserved DNA module involved in light responsiveness
Solanum lycopersicum	Solyc05g010310.3.1	Solyc05g010310.3	SlCHI2	I	OG1	GATA-motif	1615	1624	part of a light responsive element
Solanum lycopersicum	Solyc05g010310.3.1	Solyc05g010310.3	SlCHI2	I	OG1	L-box	1681	1689	part of a light responsive element
Solanum lycopersicum	Solyc05g010310.3.1	Solyc05g010310.3	SlCHI2	I	OG1	P-box	276	283	gibberellin-responsive element
Solanum lycopersicum	Solyc05g010310.3.1	Solyc05g010310.3	SlCHI2	I	OG1	TCCC-motif	888	895	part of a light responsive element
Solanum lycopersicum	Solyc05g010310.3.1	Solyc05g010310.3	SlCHI2	I	OG1	G-box	367	376	cis-acting regulatory element involved in light responsiveness
Solanum lycopersicum	Solyc05g010310.3.1	Solyc05g010310.3	SlCHI2	I	OG1	G-box	370	376	cis-acting regulatory element involved in light responsiveness
Solanum lycopersicum	Solyc05g010310.3.1	Solyc05g010310.3	SlCHI2	I	OG1	MBS	509	515	MYB binding site involved in drought-inducibility
Solanum lycopersicum	Solyc05g010310.3.1	Solyc05g010310.3	SlCHI2	I	OG1	MBS	1181	1187	MYB binding site involved in drought-inducibility
Solanum lycopersicum	Solyc05g010310.3.1	Solyc05g010310.3	SlCHI2	I	OG1	MBS	1190	1196	MYB binding site involved in drought-inducibility
Solanum lycopersicum	Solyc05g010310.3.1	Solyc05g010310.3	SlCHI2	I	OG1	MBS	1808	1814	MYB binding site involved in drought-inducibility
Solanum lycopersicum	Solyc05g010310.3.1	Solyc05g010310.3	SlCHI2	I	OG1	GT1-motif	904	910	light responsive element
Solanum lycopersicum	Solyc05g010310.3.1	Solyc05g010310.3	SlCHI2	I	OG1	GT1-motif	943	950	light responsive element
Solanum lycopersicum	Solyc05g010310.3.1	Solyc05g010310.3	SlCHI2	I	OG1	GT1-motif	1330	1336	light responsive element
Solanum lycopersicum	Solyc05g010310.3.1	Solyc05g010310.3	SlCHI2	I	OG1	GT1-motif	1617	1623	light responsive element
Solanum lycopersicum	Solyc05g010310.3.1	Solyc05g010310.3	SlCHI2	I	OG1	O2-site	917	926	cis-acting regulatory element involved in zein metabolism regulation
Solanum lycopersicum	Solyc05g010310.3.1	Solyc05g010310.3	SlCHI2	I	OG1	O2-site	1096	1105	cis-acting regulatory element involved in zein metabolism regulation
Solanum lycopersicum	Solyc05g010310.3.1	Solyc05g010310.3	SlCHI2	I	OG1	GC-motif	1546	1552	enhancer-like element involved in anoxic specific inducibility
Solanum lycopersicum	Solyc05g010310.3.1	Solyc05g010310.3	SlCHI2	I	OG1	TGA-element	1069	1075	auxin-responsive element
Solanum lycopersicum	Solyc05g010310.3.1	Solyc05g010310.3	SlCHI2	I	OG1	GA-motif	1683	1691	part of a light responsive element
Solanum lycopersicum	Solyc05g010310.3.1	Solyc05g010310.3	SlCHI2	I	OG1	MRE	38	45	MYB binding site involved in light responsiveness
Solanum lycopersicum	Solyc05g010310.3.1	Solyc05g010310.3	SlCHI2	I	OG1	ARE	97	103	cis-acting regulatory element essential for the anaerobic induction
Solanum lycopersicum	Solyc05g010310.3.1	Solyc05g010310.3	SlCHI2	I	OG1	ARE	228	234	cis-acting regulatory element essential for the anaerobic induction
Solanum lycopersicum	Solyc05g010310.3.1	Solyc05g010310.3	SlCHI2	I	OG1	ARE	1923	1929	cis-acting regulatory element essential for the anaerobic induction
Solanum lycopersicum	Solyc05g010310.3.1	Solyc05g010310.3	SlCHI2	I	OG1	ABRE	370	376	cis-acting element involved in the abscisic acid responsiveness
Solanum lycopersicum	Solyc05g010310.3.1	Solyc05g010310.3	SlCHI2	I	OG1	ABRE	371	376	cis-acting element involved in the abscisic acid responsiveness
Solanum lycopersicum	Solyc05g010310.3.1	Solyc05g010310.3	SlCHI2	I	OG1	ABRE	1740	1745	cis-acting element involved in the abscisic acid responsiveness
Solanum lycopersicum	Solyc05g010310.3.1	Solyc05g010310.3	SlCHI2	I	OG1	TC-rich repeats	355	364	cis-acting element involved in defense and stress responsiveness
Solanum lycopersicum	Solyc05g010310.3.1	Solyc05g010310.3	SlCHI2	I	OG1	CGTCA-motif	311	316	cis-acting regulatory element involved in the MeJA-responsiveness
Solanum lycopersicum	Solyc05g010310.3.1	Solyc05g010310.3	SlCHI2	I	OG1	G-box	370	376	cis-acting regulatory element involved in light responsiveness
Solanum lycopersicum	Solyc05g010310.3.1	Solyc05g010310.3	SlCHI2	I	OG1	G-box	1739	1745	cis-acting regulatory element involved in light responsiveness
Solanum lycopersicum	Solyc05g010310.3.1	Solyc05g010310.3	SlCHI2	I	OG1	Box II	1912	1921	part of a light responsive element
Solanum lycopersicum	Solyc05g010320.3.1	Solyc05g010320.3	SlCHI3	I	OG1	Box II	902	911	part of a light responsive element
Solanum lycopersicum	Solyc05g010320.3.1	Solyc05g010320.3	SlCHI3	I	OG1	G-box	1010	1016	cis-acting regulatory element involved in light responsiveness
Solanum lycopersicum	Solyc05g010320.3.1	Solyc05g010320.3	SlCHI3	I	OG1	G-box	1665	1673	cis-acting regulatory element involved in light responsiveness
Solanum lycopersicum	Solyc05g010320.3.1	Solyc05g010320.3	SlCHI3	I	OG1	G-box	1666	1672	cis-acting regulatory element involved in light responsiveness
Solanum lycopersicum	Solyc05g010320.3.1	Solyc05g010320.3	SlCHI3	I	OG1	G-box	1749	1757	cis-acting regulatory element involved in light responsiveness
Solanum lycopersicum	Solyc05g010320.3.1	Solyc05g010320.3	SlCHI3	I	OG1	G-box	1750	1756	cis-acting regulatory element involved in light responsiveness
Solanum lycopersicum	Solyc05g010320.3.1	Solyc05g010320.3	SlCHI3	I	OG1	CGTCA-motif	144	149	cis-acting regulatory element involved in the MeJA-responsiveness
Solanum lycopersicum	Solyc05g010320.3.1	Solyc05g010320.3	SlCHI3	I	OG1	TC-rich repeats	1000	1009	cis-acting element involved in defense and stress responsiveness
Solanum lycopersicum	Solyc05g010320.3.1	Solyc05g010320.3	SlCHI3	I	OG1	TC-rich repeats	1602	1611	cis-acting element involved in defense and stress responsiveness
Solanum lycopersicum	Solyc05g010320.3.1	Solyc05g010320.3	SlCHI3	I	OG1	ABRE	1010	1016	cis-acting element involved in the abscisic acid responsiveness
Solanum lycopersicum	Solyc05g010320.3.1	Solyc05g010320.3	SlCHI3	I	OG1	ABRE	1011	1016	cis-acting element involved in the abscisic acid responsiveness
Solanum lycopersicum	Solyc05g010320.3.1	Solyc05g010320.3	SlCHI3	I	OG1	ABRE	1666	1672	cis-acting element involved in the abscisic acid responsiveness
Solanum lycopersicum	Solyc05g010320.3.1	Solyc05g010320.3	SlCHI3	I	OG1	ABRE	1667	1672	cis-acting element involved in the abscisic acid responsiveness
Solanum lycopersicum	Solyc05g010320.3.1	Solyc05g010320.3	SlCHI3	I	OG1	ABRE	1750	1756	cis-acting element involved in the abscisic acid responsiveness
Solanum lycopersicum	Solyc05g010320.3.1	Solyc05g010320.3	SlCHI3	I	OG1	ABRE	1751	1756	cis-acting element involved in the abscisic acid responsiveness
Solanum lycopersicum	Solyc05g010320.3.1	Solyc05g010320.3	SlCHI3	I	OG1	MRE	1206	1213	MYB binding site involved in light responsiveness
Solanum lycopersicum	Solyc05g010320.3.1	Solyc05g010320.3	SlCHI3	I	OG1	GT1-motif	843	850	light responsive element
Solanum lycopersicum	Solyc05g010320.3.1	Solyc05g010320.3	SlCHI3	I	OG1	GT1-motif	844	850	light responsive element
Solanum lycopersicum	Solyc05g010320.3.1	Solyc05g010320.3	SlCHI3	I	OG1	G-box	1010	1016	cis-acting regulatory element involved in light responsiveness
Solanum lycopersicum	Solyc05g010320.3.1	Solyc05g010320.3	SlCHI3	I	OG1	G-box	1666	1672	cis-acting regulatory element involved in light responsiveness
Solanum lycopersicum	Solyc05g010320.3.1	Solyc05g010320.3	SlCHI3	I	OG1	G-box	1750	1756	cis-acting regulatory element involved in light responsiveness
Solanum lycopersicum	Solyc05g010320.3.1	Solyc05g010320.3	SlCHI3	I	OG1	TCT-motif	827	833	part of a light responsive element
Solanum lycopersicum	Solyc05g010320.3.1	Solyc05g010320.3	SlCHI3	I	OG1	Box 4	19	25	part of a conserved DNA module involved in light responsiveness
Solanum lycopersicum	Solyc05g010320.3.1	Solyc05g010320.3	SlCHI3	I	OG1	Box 4	190	196	part of a conserved DNA module involved in light responsiveness
Solanum lycopersicum	Solyc05g010320.3.1	Solyc05g010320.3	SlCHI3	I	OG1	Box 4	416	422	part of a conserved DNA module involved in light responsiveness
Solanum lycopersicum	Solyc05g010320.3.1	Solyc05g010320.3	SlCHI3	I	OG1	Box 4	729	735	part of a conserved DNA module involved in light responsiveness
Solanum lycopersicum	Solyc05g010320.3.1	Solyc05g010320.3	SlCHI3	I	OG1	TGACG-motif	144	149	cis-acting regulatory element involved in the MeJA-responsiveness
Solanum lycopersicum	Solyc05g052240.3.1	Solyc05g052240.3	SlCHI4	IV	OG3	TC-rich repeats	416	425	cis-acting element involved in defense and stress responsiveness
Solanum lycopersicum	Solyc05g052240.3.1	Solyc05g052240.3	SlCHI4	IV	OG3	TC-rich repeats	783	792	cis-acting element involved in defense and stress responsiveness
Solanum lycopersicum	Solyc05g052240.3.1	Solyc05g052240.3	SlCHI4	IV	OG3	CGTCA-motif	968	973	cis-acting regulatory element involved in the MeJA-responsiveness
[truncated: 1,180 more rows]

## Sheet: Table S7B
Table S7B .Statistical and categories of cis-acting elements from 122 CHI genes
Primary categories	numbers	Secondary categories	moitf	numbers
hormone respone	1075	salicylic acid responsiveness	TCA-element	62
		abscisic acid responsiveness	ABRE	413
		MeJA-responsiveness	CGTCA-motif	219
			TGACG-motif	217
		gibberellin-responsiveness	TATC-box	24
			GARE-motif	23
			P-box	38
		auxin responsiveness	TGA-element	57
			AuxRR-core	17
			TGA-box	4
			AuxRE	1
growth and development	185	zein metabolism	O2-site	50
		seed-specific regulation	RY-element	16
		circadian	circadian	22
		differentiation of the palisade mesophyll cells	HD-Zip 1	7
		cell cycle	MSA-like	6
		flavonoid	MBSI	8
		endosperm	GCN4_motif	17
			AACA_motif	5
		meristem	CAT-box	72
			NON-box	1
stress induction	495	anaerobic induction	ARE	220
		low-temperature responsiveness	LTR	73
		drought-inducibility	MBS	90
		defense and stress responsiveness	TC-rich repeats	46
		anoxic specific inducibility	GC-motif	61
		wound-responsive	WUN-motif	4
		dehydration, low-temp, salt stresses	DRE	1
light response	1403	light responsiveness	G-box	449
			ACE	24
			3-AF1 binding site	18
			Sp1	88
			GT1-motif	121
			AAAC-motif	2
			MRE	51
			ATCT-motif	19
			ATC-motif	5
			ACA-motif	3
			Box 4	203
			AE-box	47
			TCCC-motif	46
			TCT-motif	99
			L-box	51
			LAMP-element	12
			GA-motif	21
			Box II	15
			GATA-motif	75
			CAG-motif	1
			Gap-box	10
			GTGGC-motif	6
			Pc-CMA2c	2
			GATT-motif	2
			AT1-motif	9
			chs-Unit 1 m1	6
			chs-CMA1a	10
			chs-CMA2a	6
			chs-CMA2c	1
			chs-CMA2b	2
