# Supplementary figures and images for: Genome-Wide Classification and Evolutionary Analysis Reveal Diverged Patterns of Chalcone Isomerase in Plants
Source: MDPI journal article supplement (doi:10.3390/biom12070961), 2022-07-08

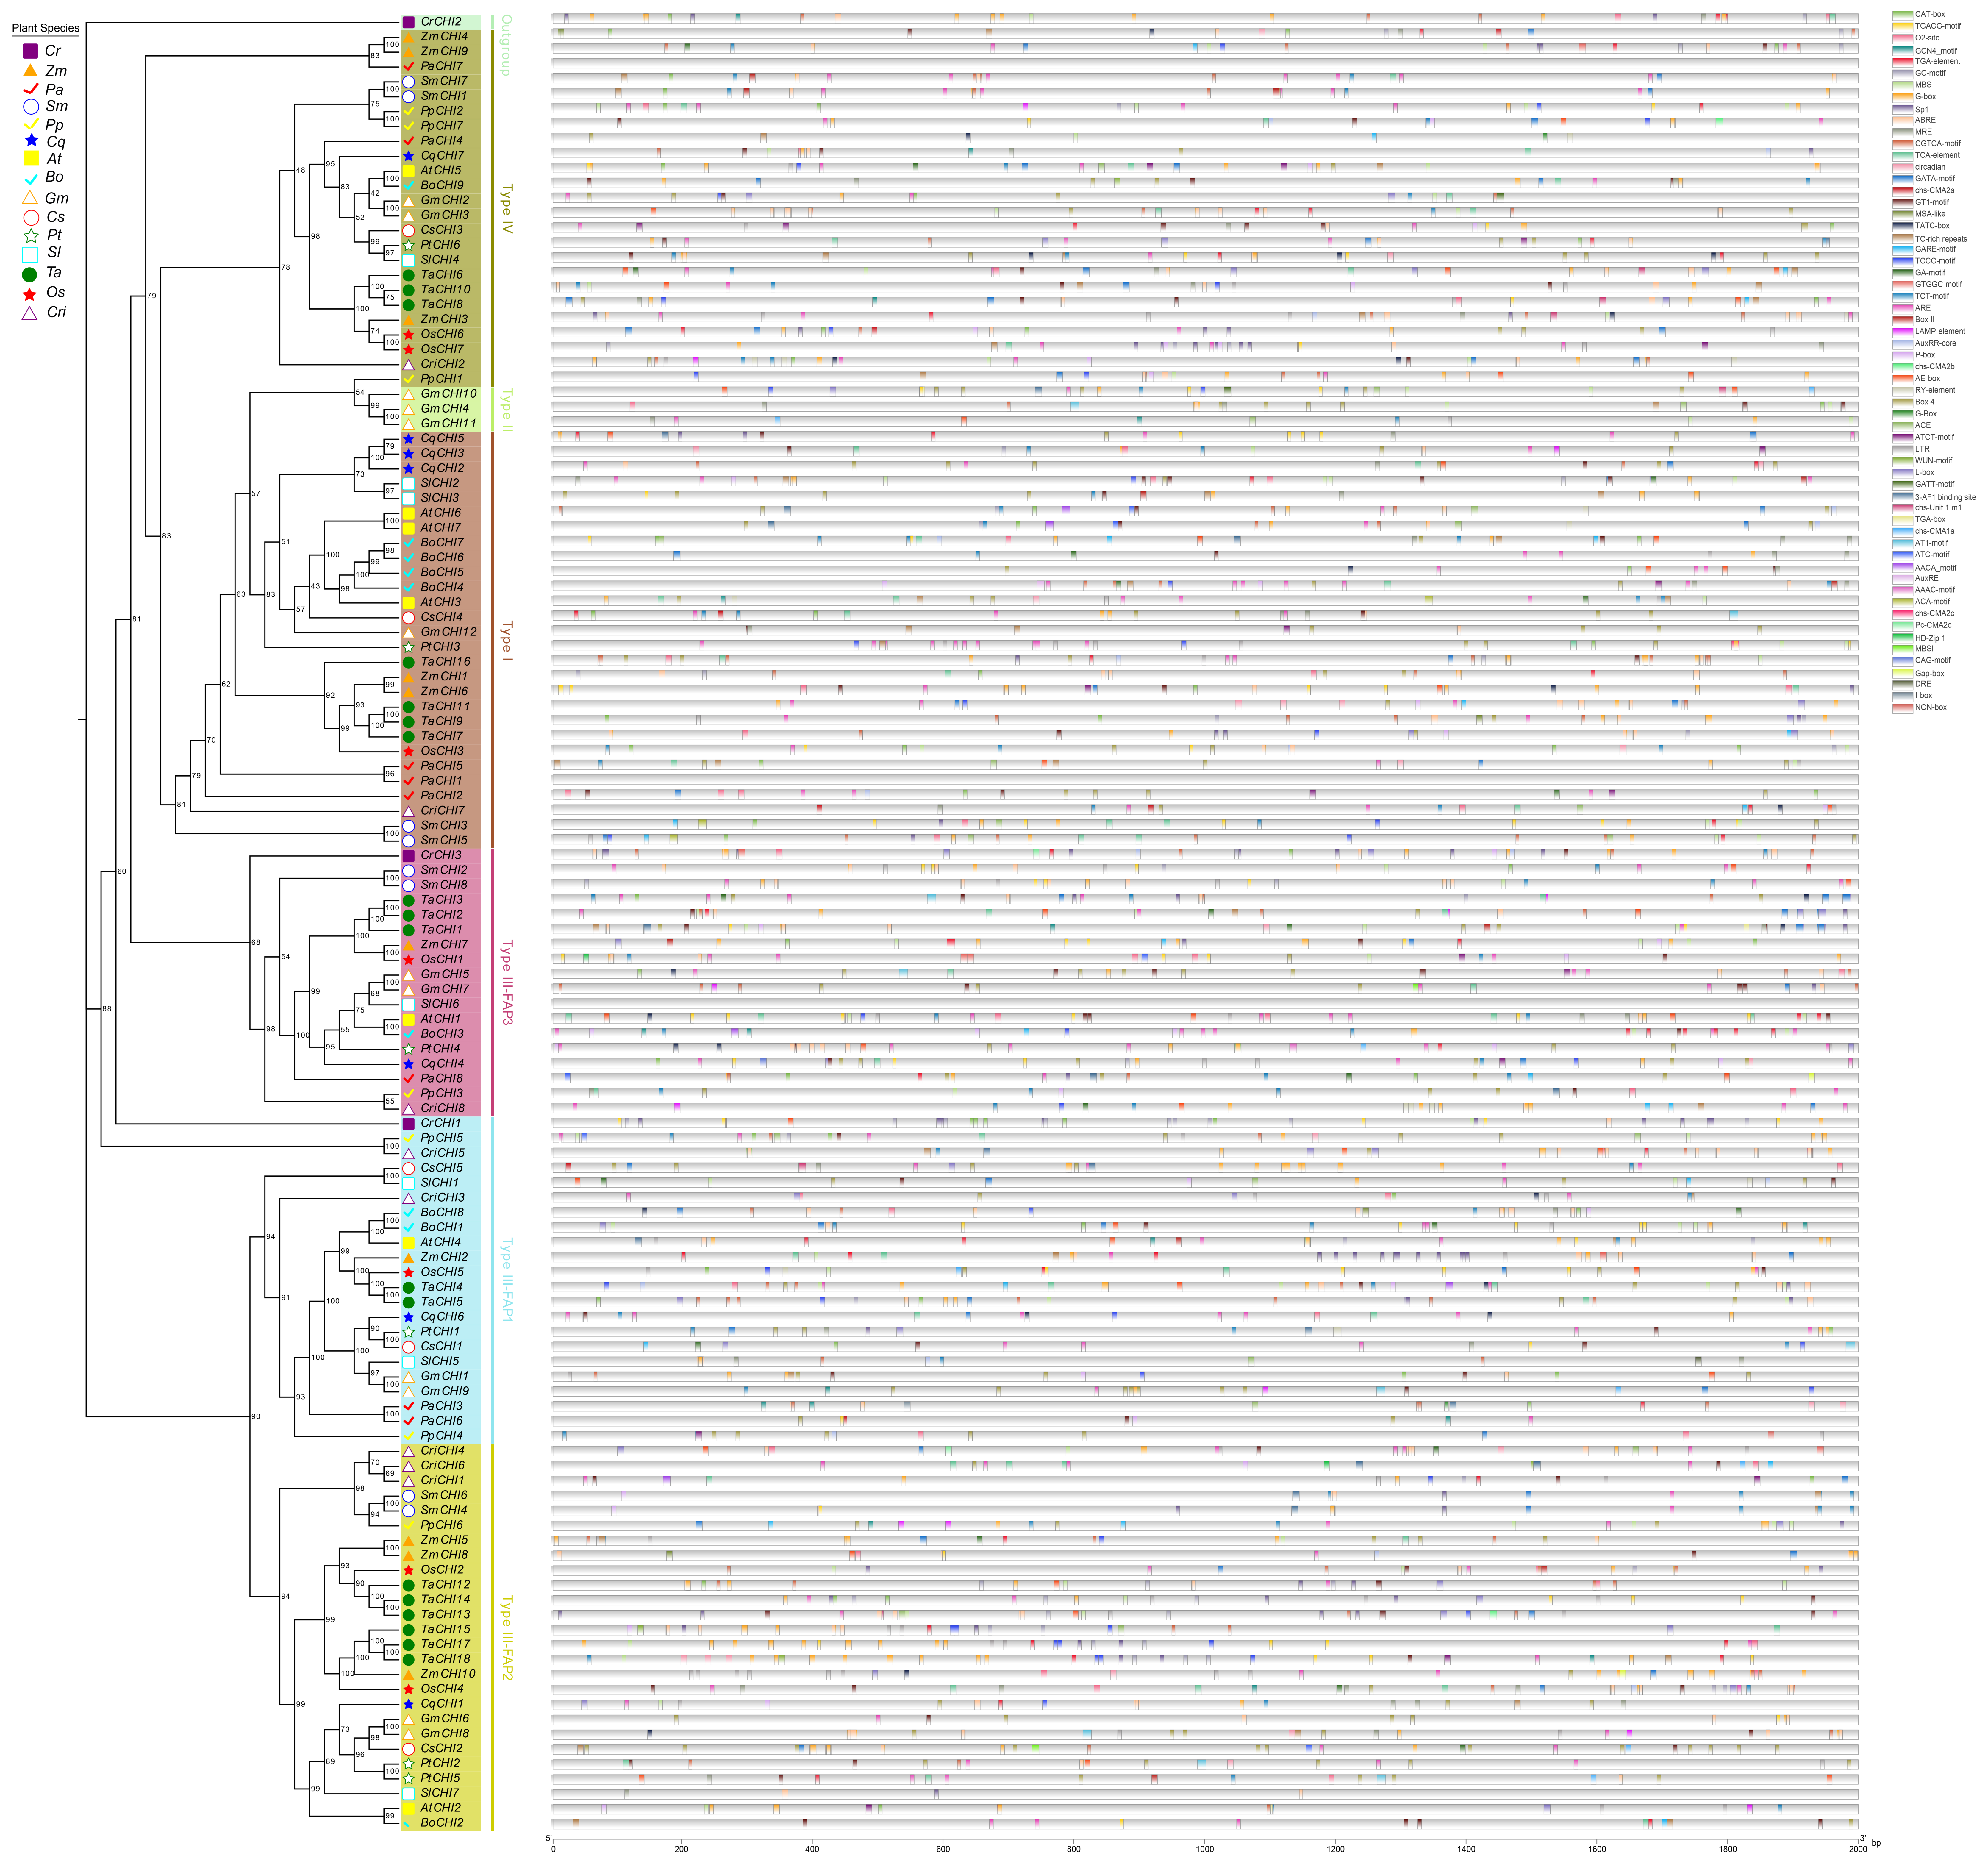

Supplement: s1 [file s1]

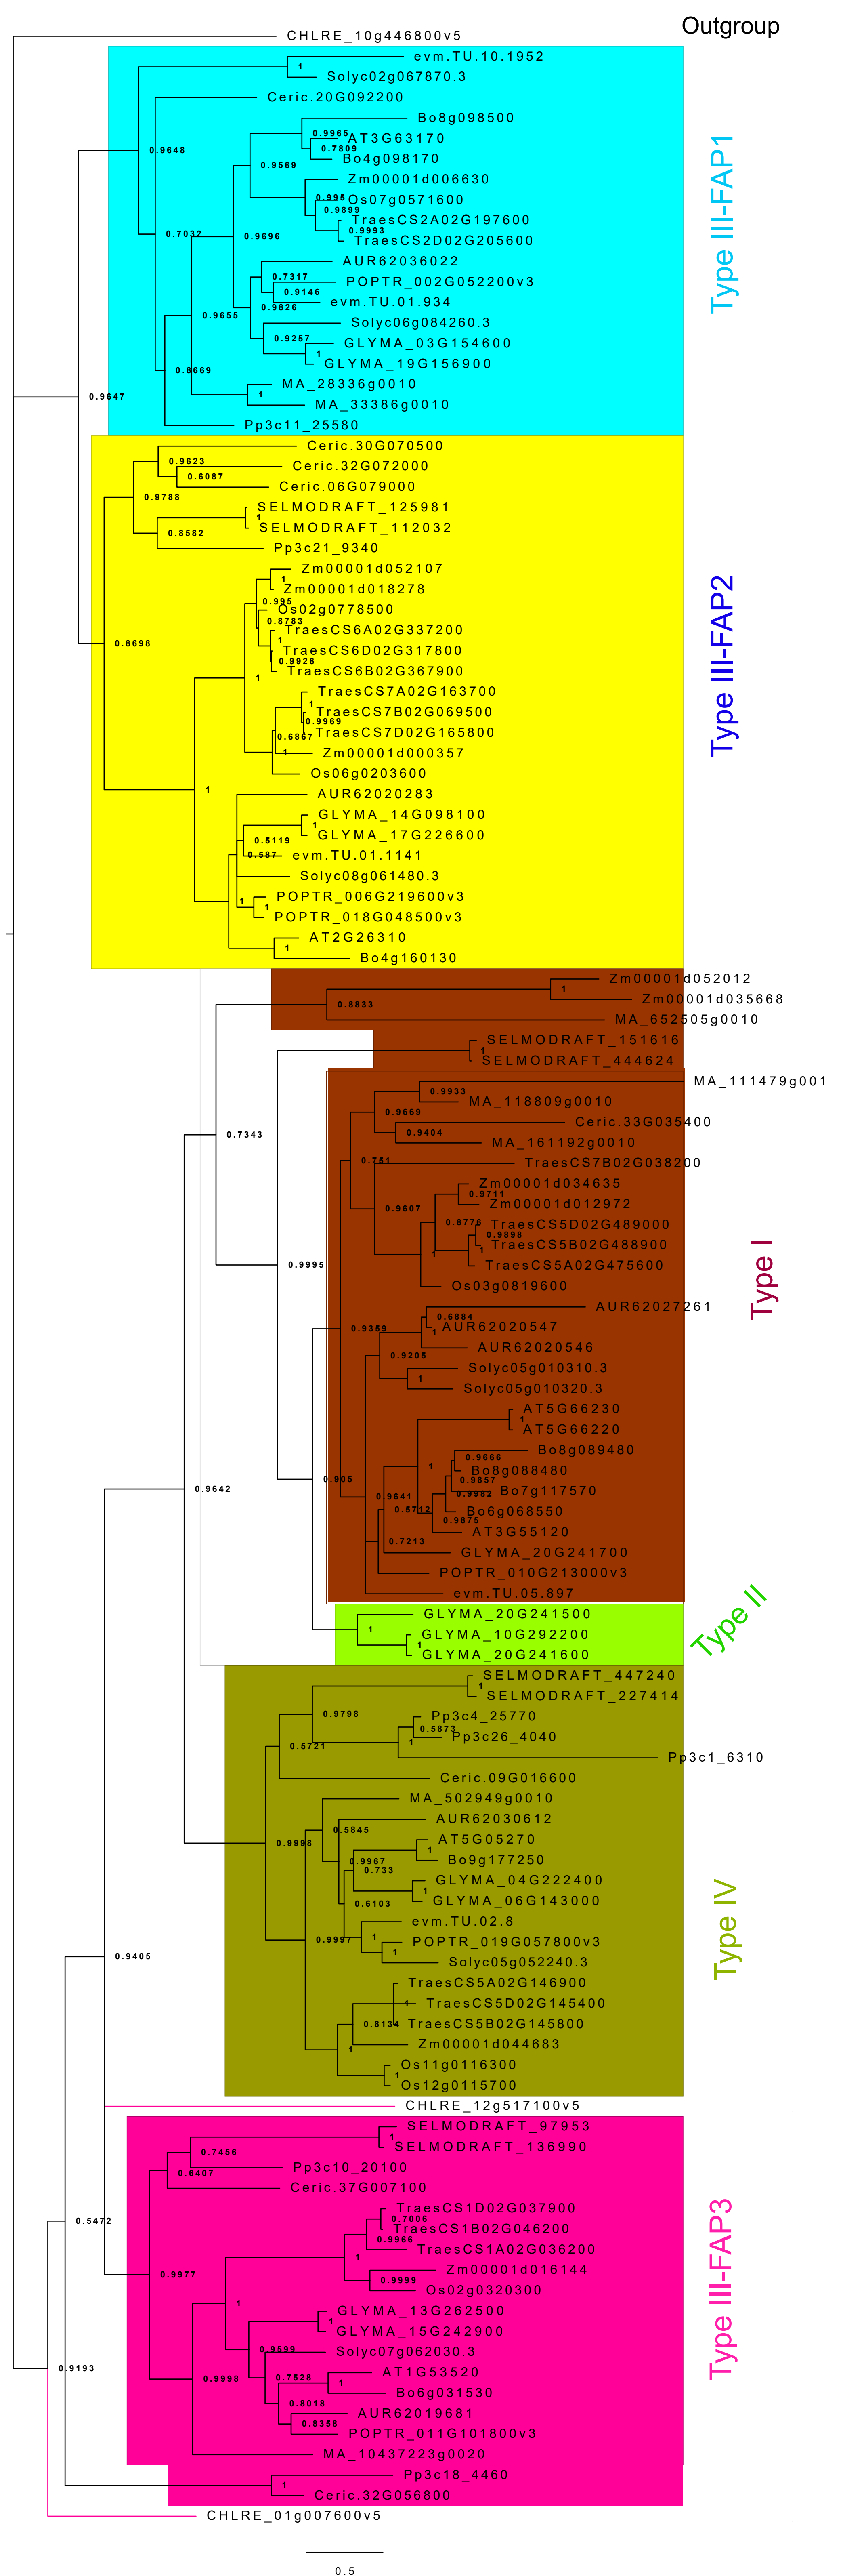

Supplement: s1 [file s1]
